# Supplementary material for: Visualization of pseudogenes in intracellular bacteria reveals the different tracks to gene destruction
Source: PubMed Central journal article supplement (PMC2374718; doi:10.1186/gb-2008-9-2-r42), 2008-02-26

- 1 Rickettsia prowazekii str. Madrid E, complete genome
- 2 Rickettsia typhi str. wilmington, complete genome
- 3 Rickettsia felis URRWXCal2, complete genome
- 4 Rickettsia akari str. Hartford chromosome, whole genome shotgun sequence
- 5 Rickettsia conorii str. Malish 7, complete genome
- 6 Rickettsia sibirica 246 rsib\_agnrcr, whole genome shotgun sequence
- 7 Rickettsia rickettsii chromosome, whole genome shotgun sequence

Reg\_id: 4

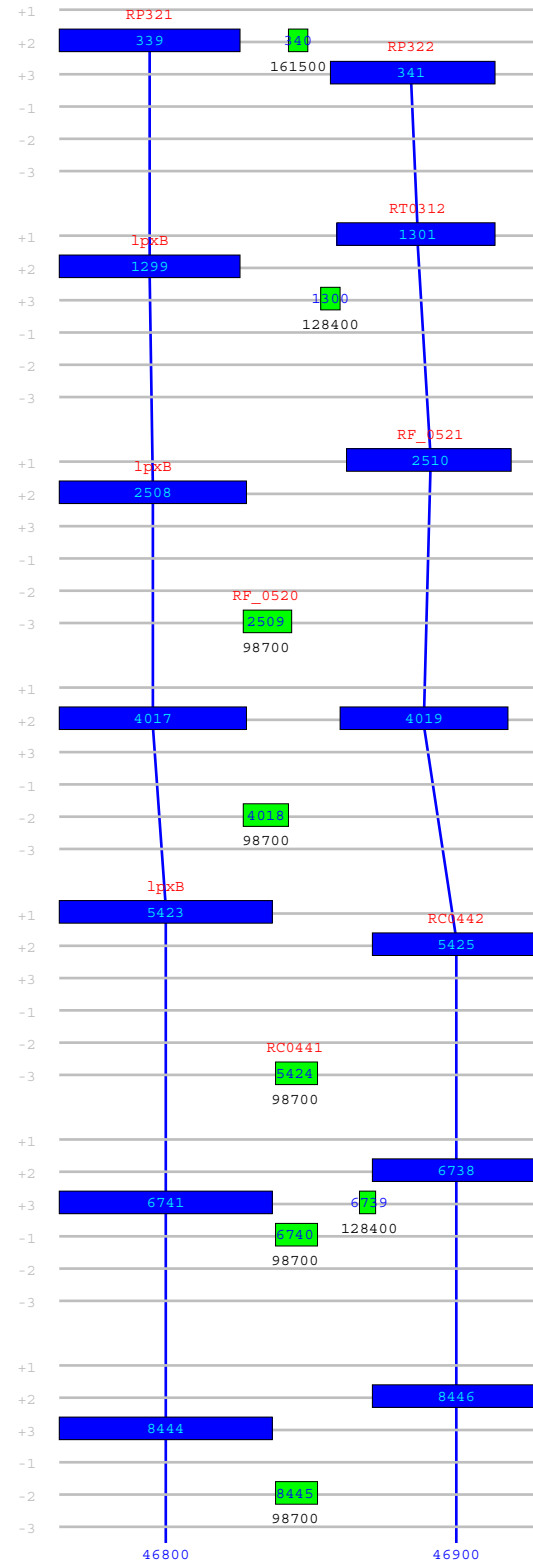

- 1 Rickettsia prowazekii str. Madrid E, complete genome
- 2 Rickettsia typhi str. wilmington, complete genome
- 3 Rickettsia felis URRWXCal2, complete genome
- 4 Rickettsia akari str. Hartford chromosome, whole genome shotgun sequence
- 5 Rickettsia conorii str. Malish 7, complete genome
- 6 Rickettsia sibirica 246 rsib\_agnrcr, whole genome shotgun sequence
- 7 Rickettsia rickettsii chromosome, whole genome shotgun sequence

Reg\_id: 5

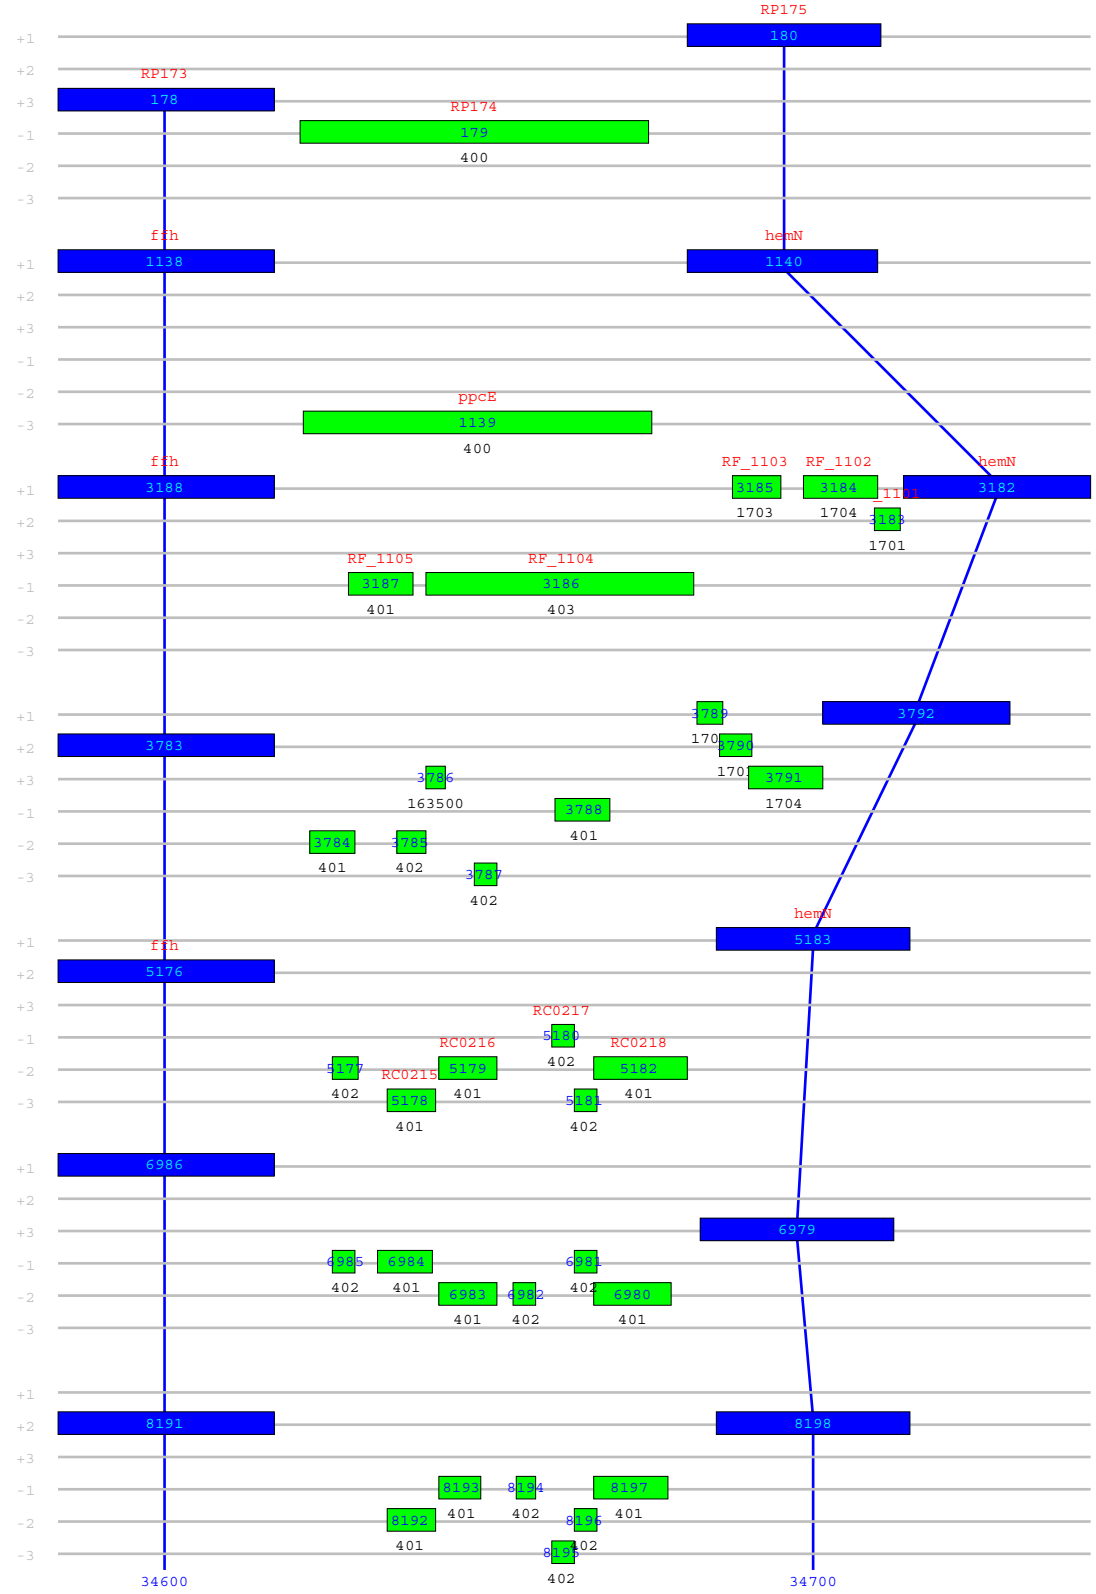

- 2 Rickettsia prowazekii str. Madrid E, complete genome
- 3 Rickettsia typhi str. wilmington, complete genome
- 4 Rickettsia felis URRWXCal2, complete genome
- 5 Rickettsia akari str. Hartford chromosome, whole genome shotgun sequence
- 6 Rickettsia conorii str. Malish 7, complete genome
- 7 Rickettsia sibirica 246 rsib\_agnrcrt, whole genome shotgun sequence

Reg\_id: 6

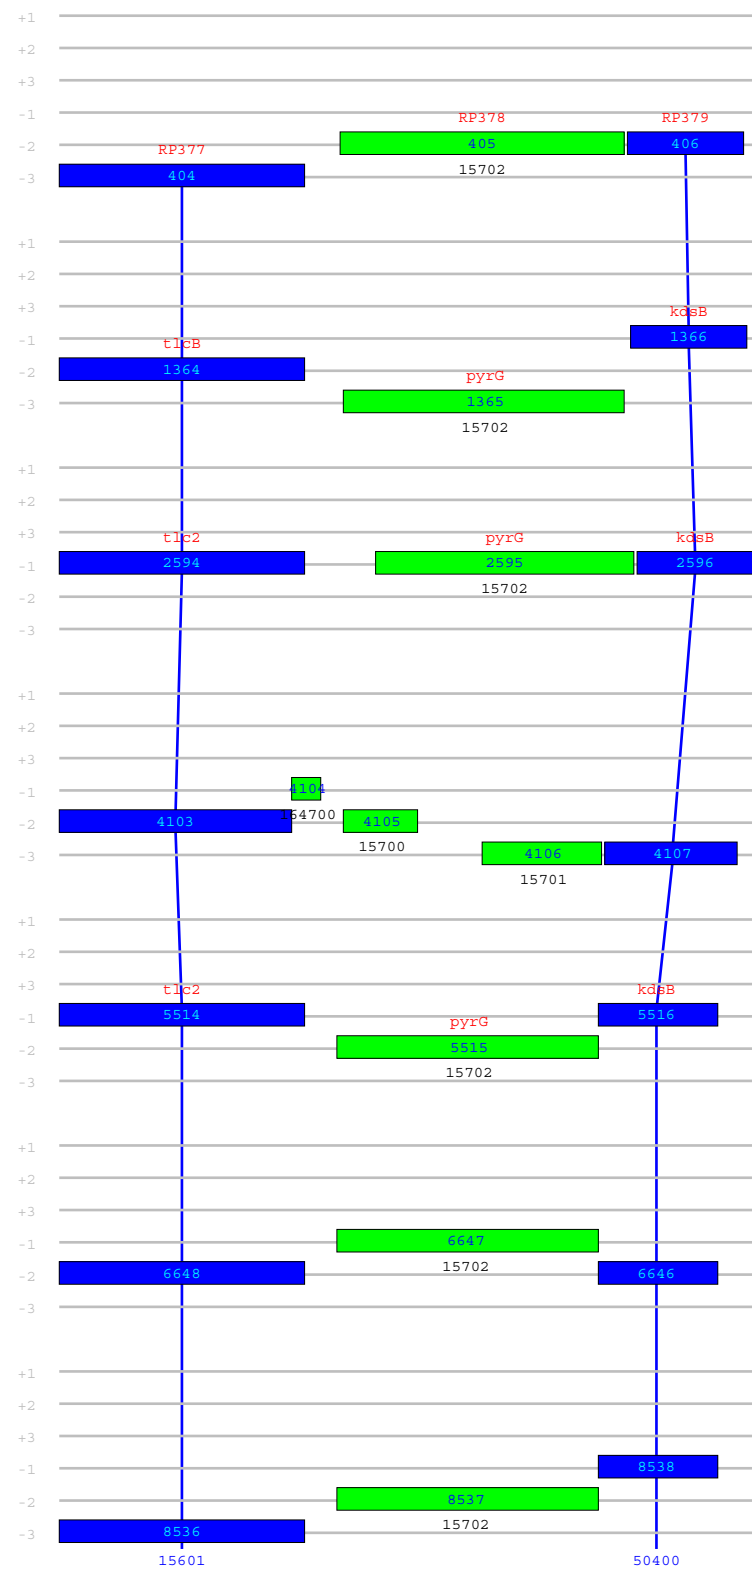

- 2 Rickettsia prowazekii str. Madrid E, complete genome
- 3 Rickettsia typhi str. wilmington, complete genome
- 3 Rickettsia felis URRWXCal2, complete genome
- 4 Rickettsia akari str. Hartford chromosome, whole genome shotgun sequence
- 5 Rickettsia conorii str. Malish 7, complete genome
- 6 Rickettsia sibirica 246 rsib\_agnrt, whole genome shotgun sequence
- 7 Rickettsia rickettsii chromosome, whole genome shotgun sequence

Reg\_id: 7

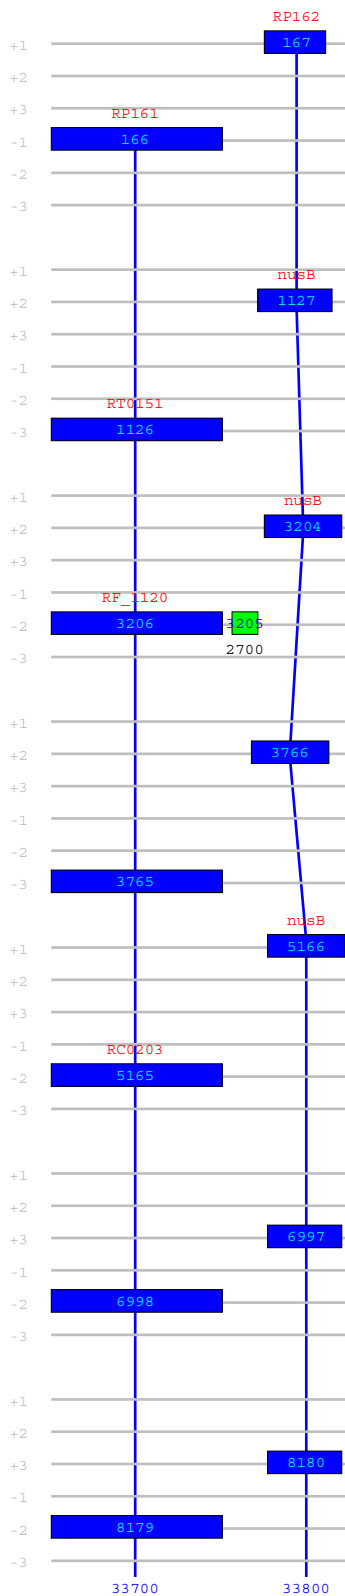

- 2 Rickettsia prowazekii str. Madrid E, complete genome
- 3 Rickettsia typhi str. wilmington, complete genome
- 3 Rickettsia felis URRWXCal2, complete genome
- 4 Rickettsia akari str. Hartford chromosome, whole genome shotgun sequence
- 5 Rickettsia conorii str. Malish 7, complete genome
- 6 Rickettsia sibirica 246 rsib\_agnrt, whole genome shotgun sequence
- 7 Rickettsia rickettsii chromosome, whole genome shotgun sequence

Reg\_id: 9

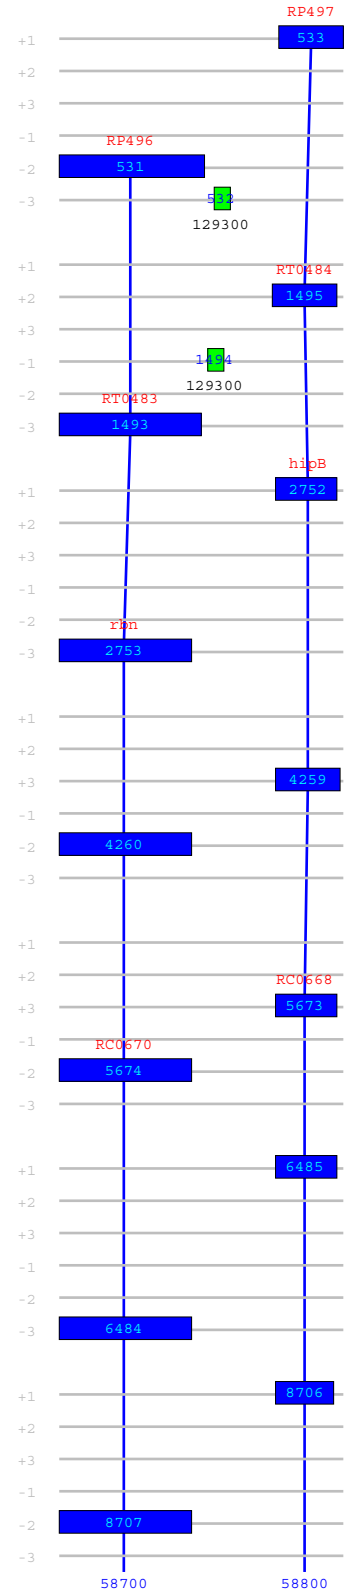

- 2 Rickettsia prowazekii str. Madrid E, complete genome
- 3 Rickettsia felis URRWXCal2, complete genome
- 4 Rickettsia akari str. Hartford chromosome, whole genome shotgun sequence
- 5 Rickettsia conorii str. Malish 7, complete genome
- 6 Rickettsia sibirica 246 rsib\_agnrcr, whole genome shotgun sequence
- 7 Rickettsia rickettsii chromosome, whole genome shotgun sequence

Reg\_id: 11

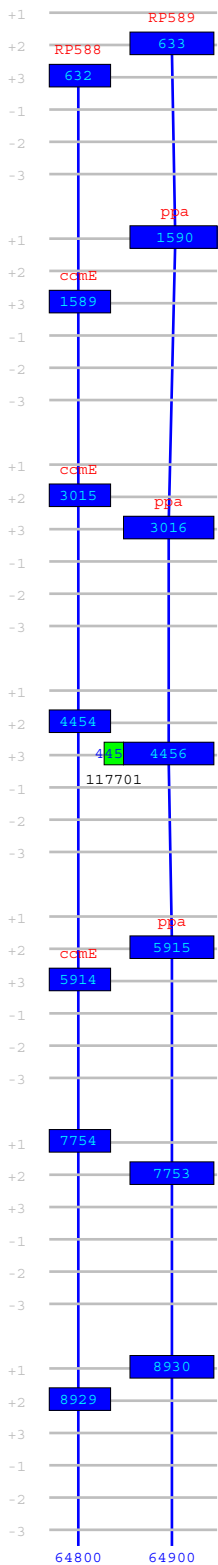

1 Rickettsia prowazekii str. Madrid E, complete genome  
 2 Rickettsia typhi str. wilmington, complete genome  
 3 Rickettsia felis URRWXCal2, complete genome  
 4 Rickettsia akari str. Hartford chromosome, whole genome shotgun sequence  
 5 Rickettsia conorii str. Malish 7, complete genome  
 6 Rickettsia sibirica 246 rsib\_agnrcrt, whole genome shotgun sequence  
 7 Rickettsia rickettsii chromosome, whole genome shotgun sequence

Reg\_id: 12

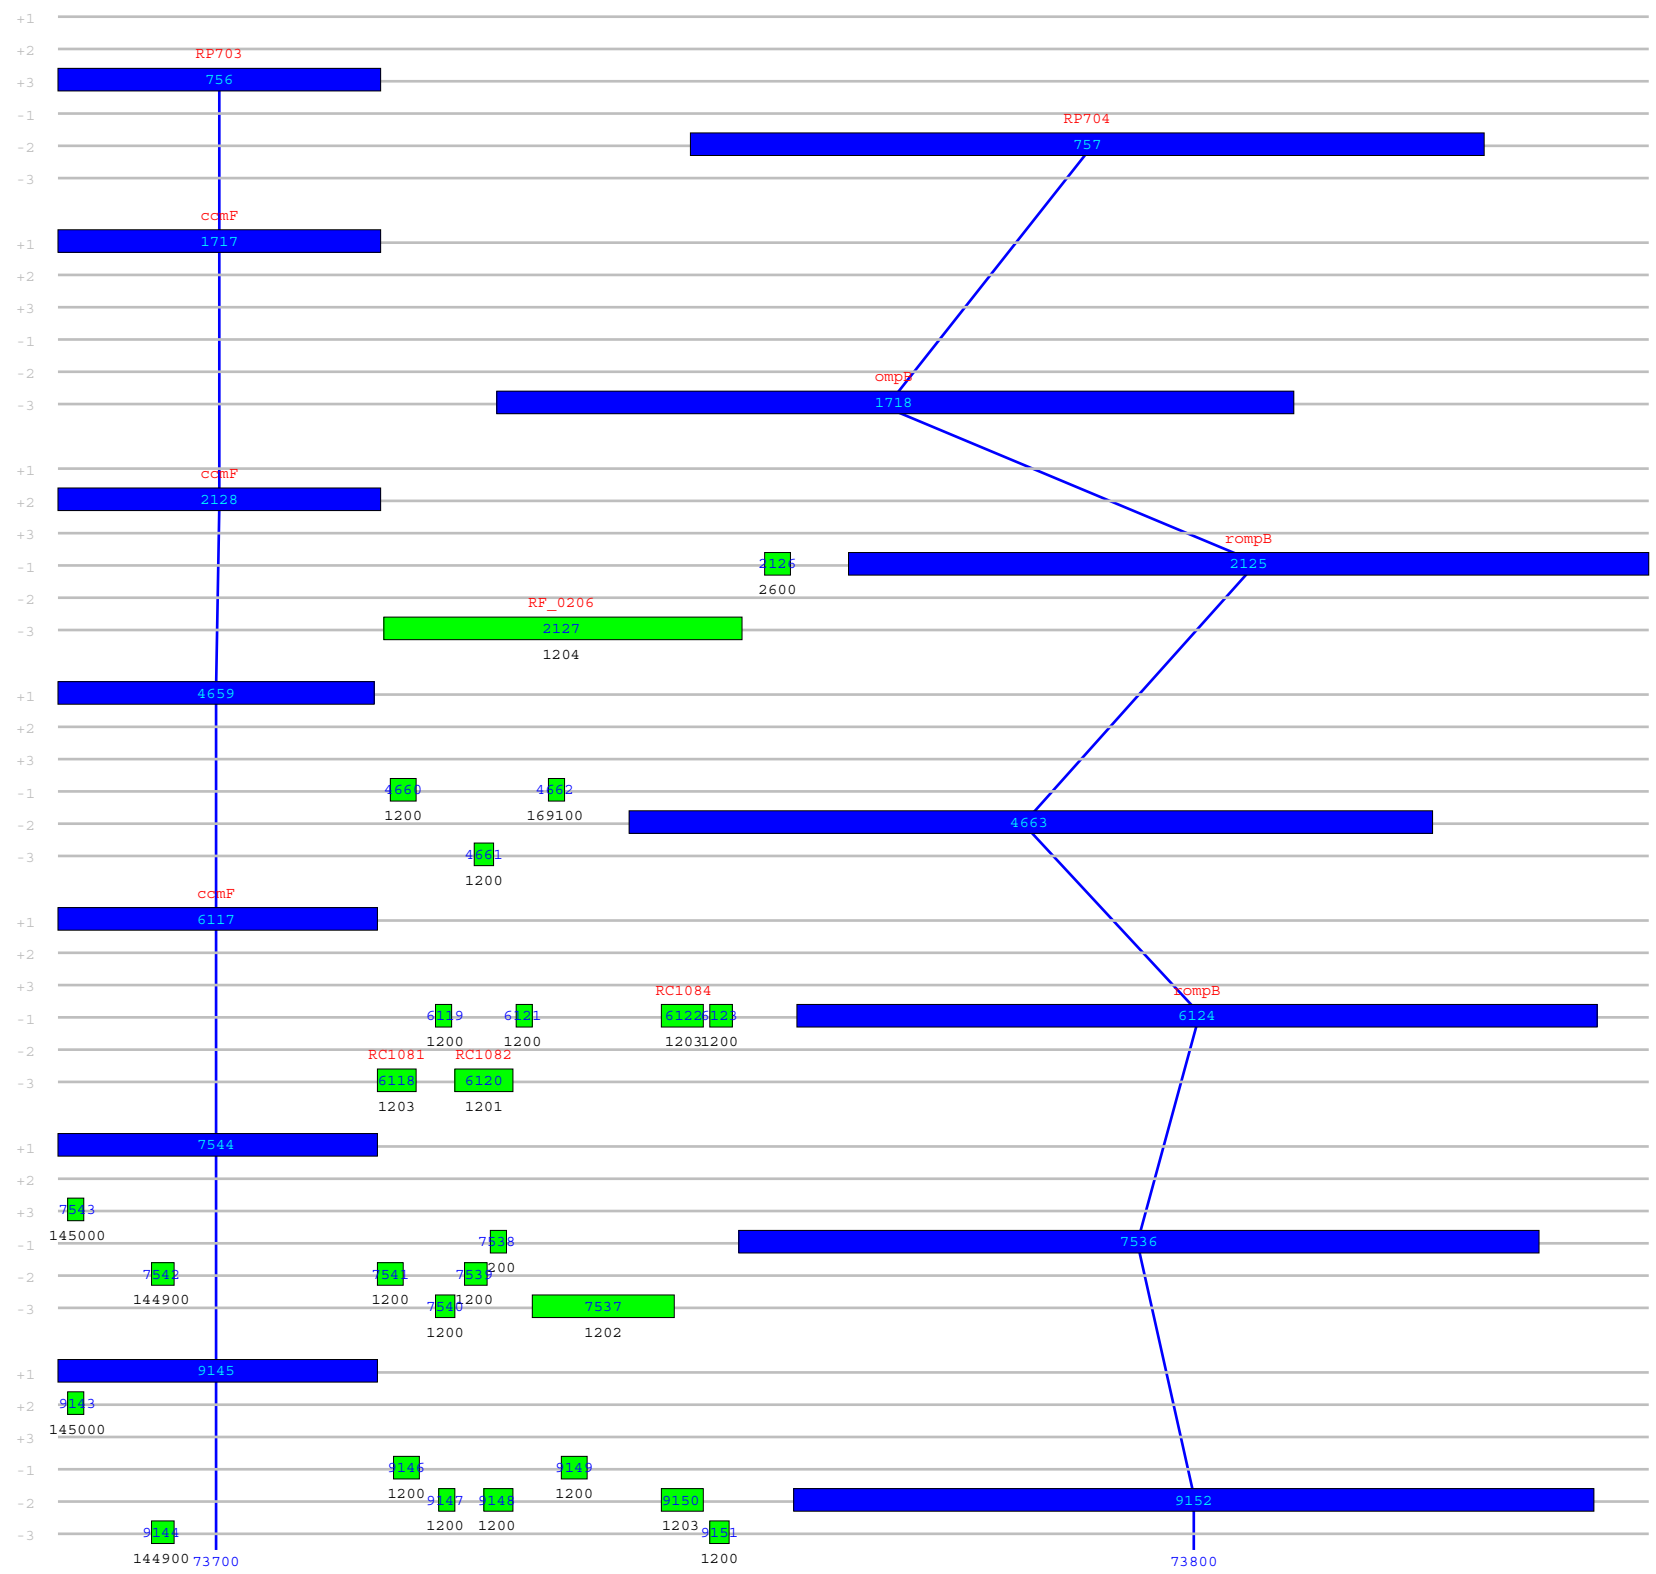

- 1 Rickettsia prowazekii str. Madrid E, complete genome
- 2 Rickettsia typhi str. wilmington, complete genome
- 3 Rickettsia felis URRWXCal2, complete genome
- 4 Rickettsia akari str. Hartford chromosome, whole genome shotgun sequence
- 5 Rickettsia conorii str. Malish 7, complete genome
- 6 Rickettsia sibirica 246 rsib\_agnrcr, whole genome shotgun sequence
- 7 Rickettsia rickettsii chromosome, whole genome shotgun sequence

Reg\_id: 13

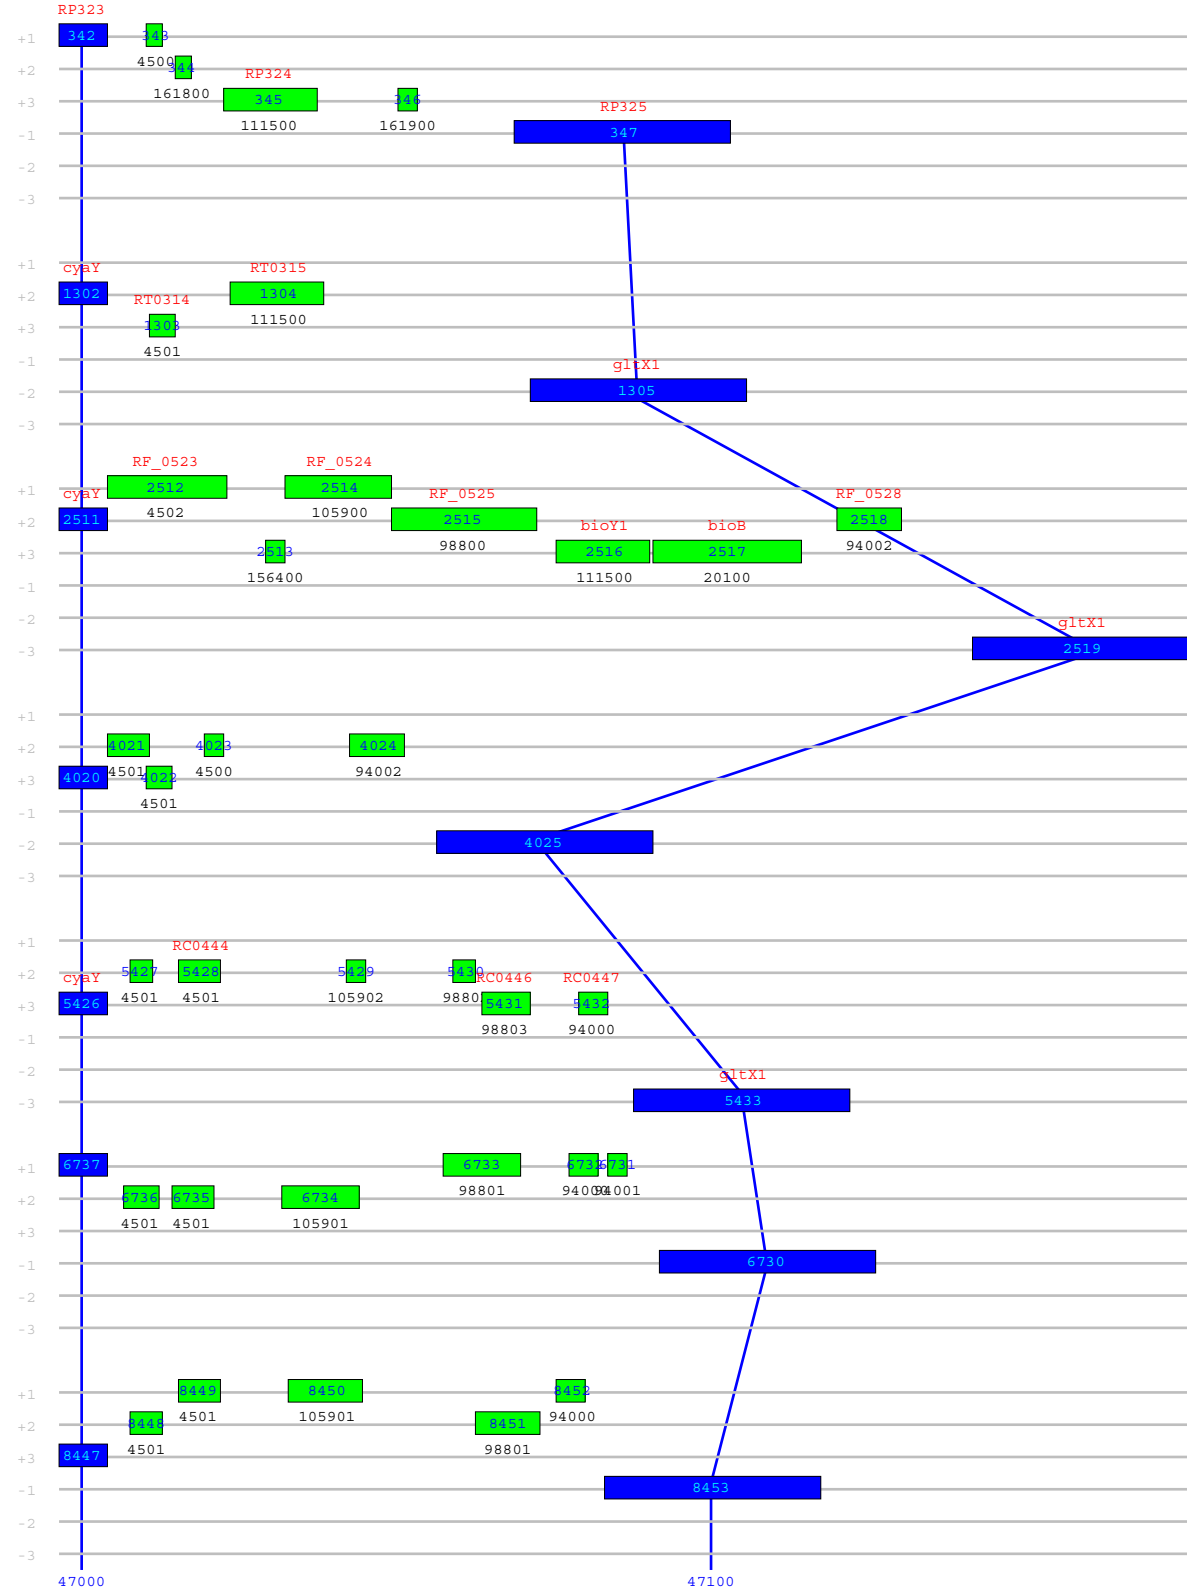



- 1 Rickettsia prowazekii str. Madrid E, complete genome
- 2 Rickettsia typhi str. wilmington, complete genome
- 3 Rickettsia felis URRWXCal2, complete genome
- 4 Rickettsia akari str. Hartford chromosome, whole genome shotgun sequence
- 5 Rickettsia conorii str. Malish 7, complete genome
- 6 Rickettsia sibirica 246 rsib\_agnrcr, whole genome shotgun sequence
- 7 Rickettsia rickettsii chromosome, whole genome shotgun sequence

Reg\_id: 14

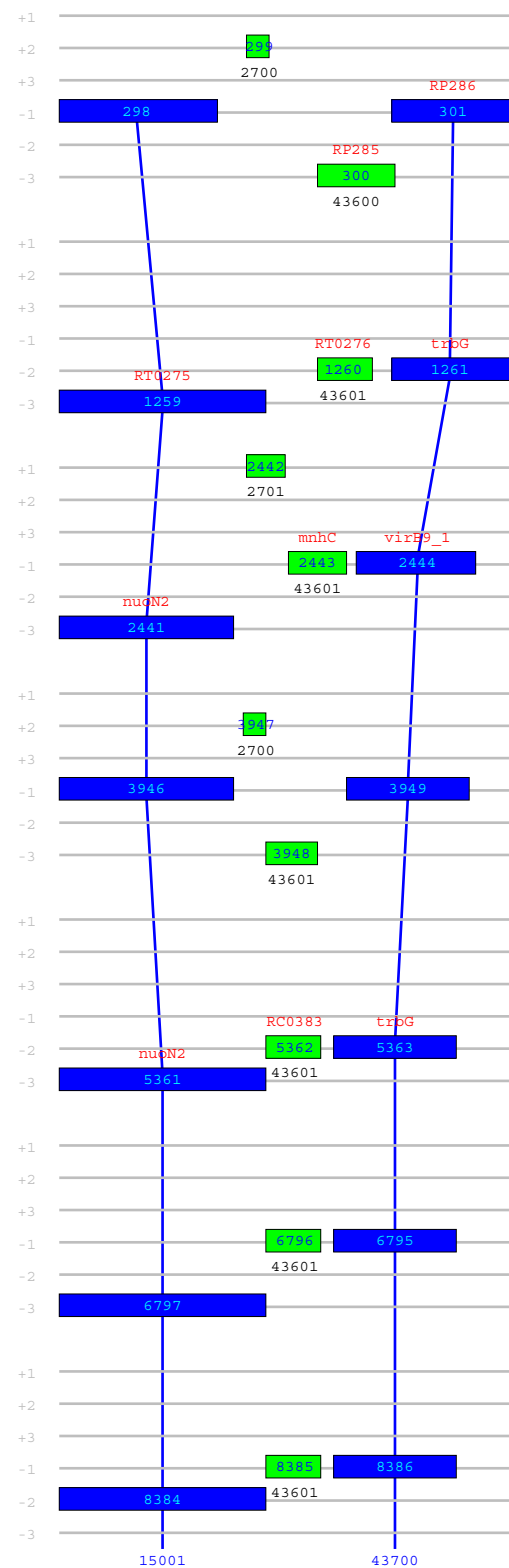

- 2 Rickettsia prowazekii str. Madrid E, complete genome
- 3 Rickettsia typhi str. wilmington, complete genome
- 4 Rickettsia felis URRWXCal2, complete genome
- 5 Rickettsia akari str. Hartford chromosome, whole genome shotgun sequence
- 6 Rickettsia conorii str. Malish 7, complete genome
- 7 Rickettsia sibirica 246 rsib\_agnrcr, whole genome shotgun sequence
- 8 Rickettsia rickettsii chromosome, whole genome shotgun sequence

Reg\_id: 17

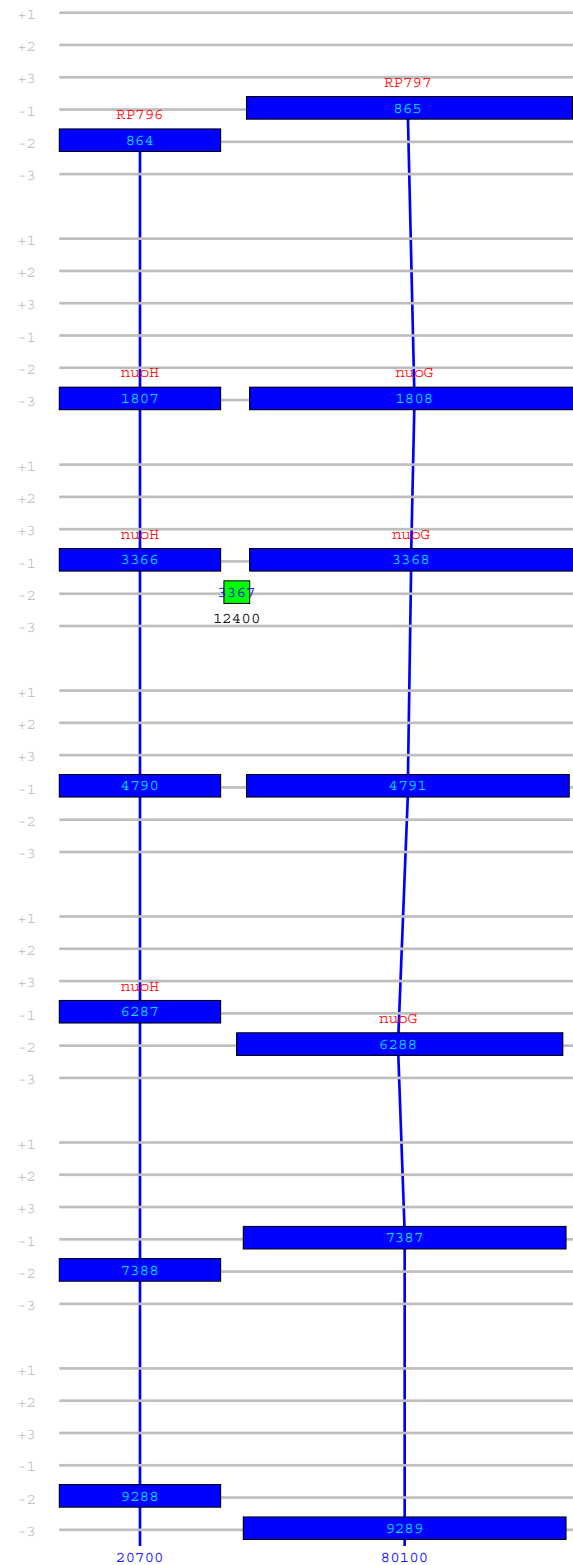

- 2 Rickettsia prowazekii str. Madrid E, complete genome
- 3 Rickettsia typhi str. wilmington, complete genome
- 4 Rickettsia felis URRWXCal2, complete genome
- 5 Rickettsia akari str. Hartford chromosome, whole genome shotgun sequence
- 6 Rickettsia conorii str. Malish 7, complete genome
- 7 Rickettsia sibirica 246 rsib\_agnrcr, whole genome shotgun sequence
- 8 Rickettsia rickettsii chromosome, whole genome shotgun sequence

Reg\_id: 18

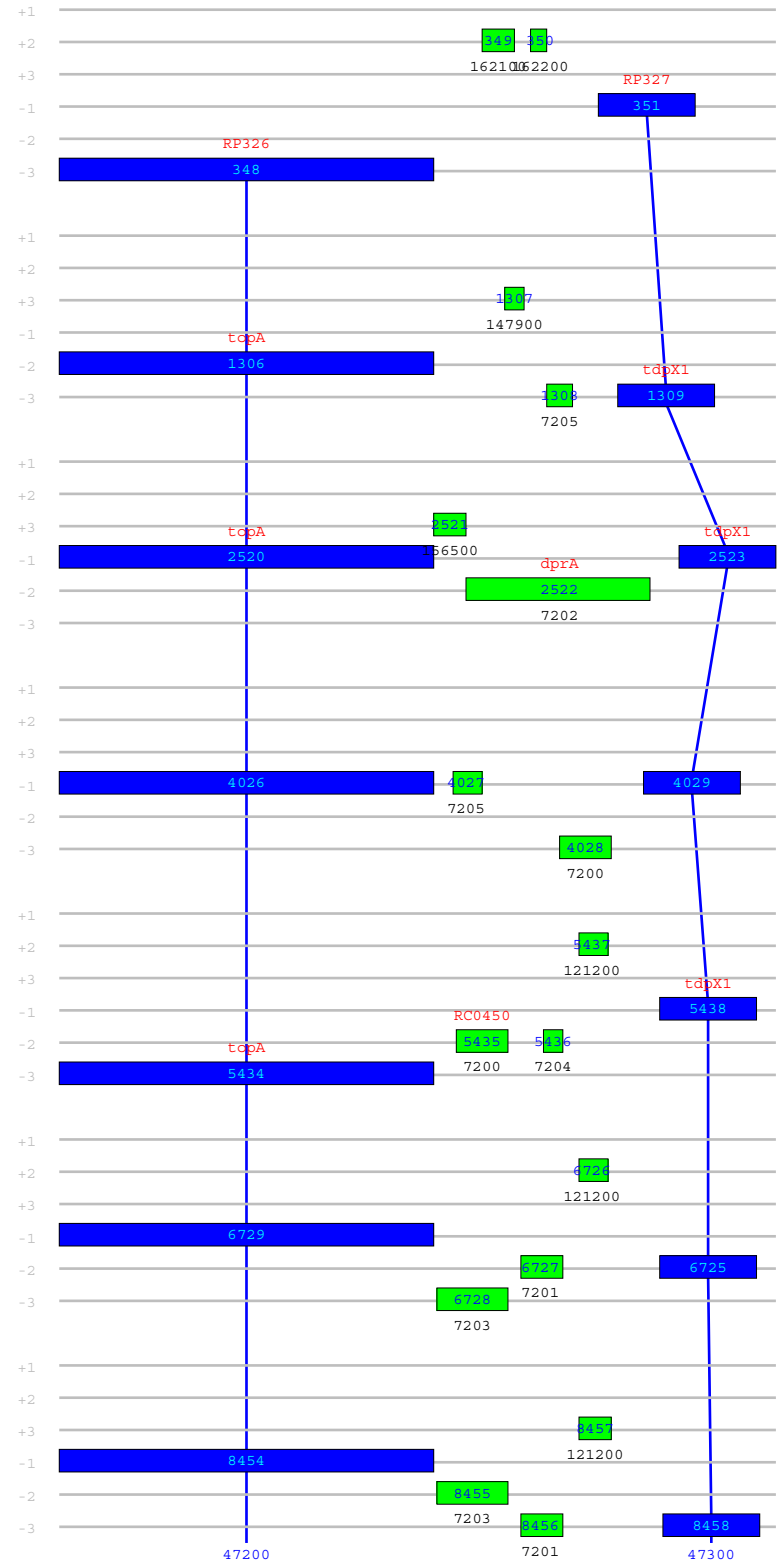

- 2 Rickettsia prowazekii str. Madrid E, complete genome
- 3 Rickettsia felis URRWXCal2, complete genome
- 4 Rickettsia akari str. Hartford chromosome, whole genome shotgun sequence
- 5 Rickettsia conorii str. Malish 7, complete genome
- 6 Rickettsia sibirica 246 rsib\_agnrcr, whole genome shotgun sequence
- 7 Rickettsia rickettsii chromosome, whole genome shotgun sequence

Reg\_id: 24

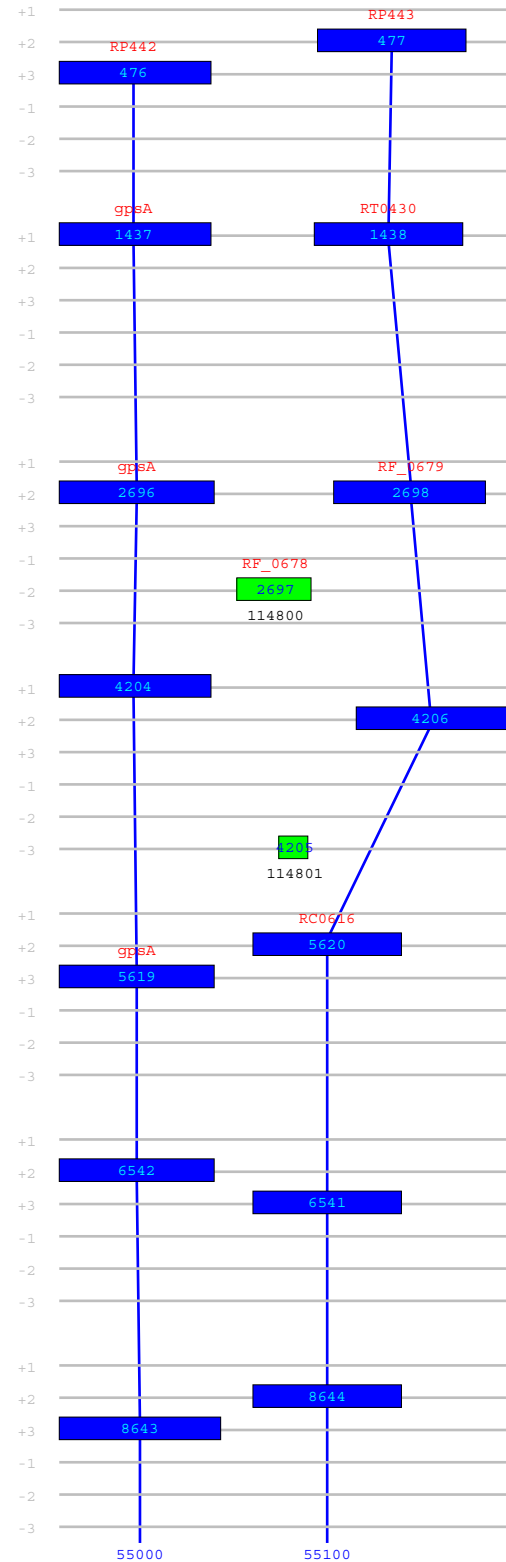

1 Rickettsia prowazekii str. Madrid E, complete genome  
 2 Rickettsia typhi str. wilmington, complete genome  
 3 Rickettsia felis URRWXCal2, complete genome  
 4 Rickettsia akari str. Hartford chromosome, whole genome shotgun sequence  
 5 Rickettsia conorii str. Malish 7, complete genome  
 6 Rickettsia sibirica 246 rsib\_agnrcr, whole genome shotgun sequence  
 7 Rickettsia rickettsii chromosome, whole genome shotgun sequence

Reg\_id: 25

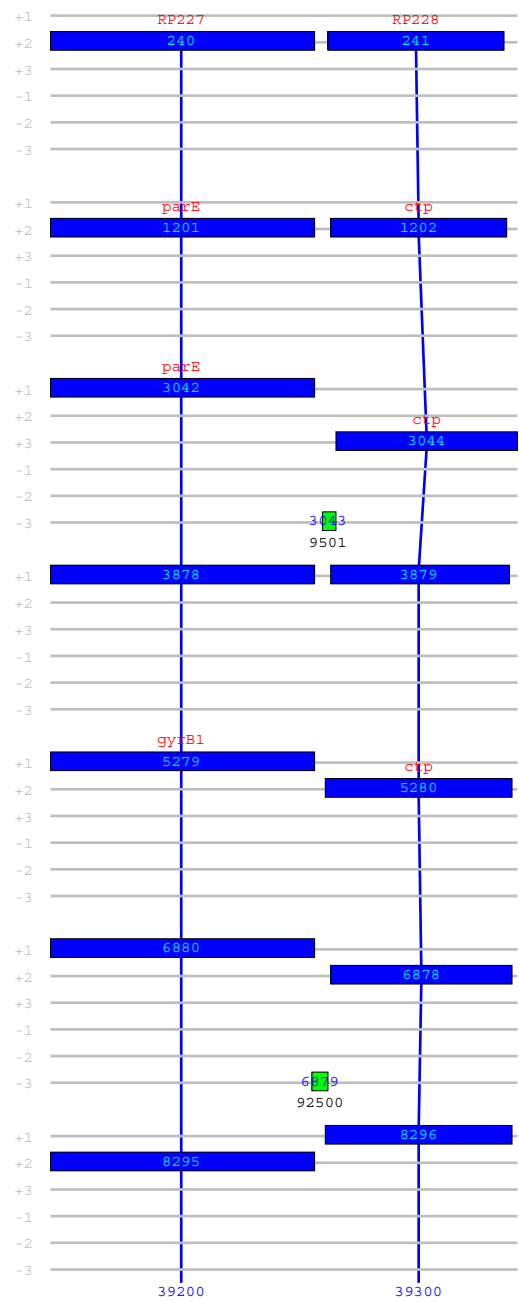

1 Rickettsia prowazekii str. Madrid E, complete genome  
 2 Rickettsia typhi str. wilmington, complete genome  
 3 Rickettsia felis URRWXCal2, complete genome  
 4 Rickettsia akari str. Hartford chromosome, whole genome shotgun sequence  
 5 Rickettsia conorii str. Malish 7, complete genome  
 6 Rickettsia sibirica 246 rsib\_agnrct, whole genome shotgun sequence  
 7 Rickettsia rickettsii chromosome, whole genome shotgun sequence

Reg\_id: 29

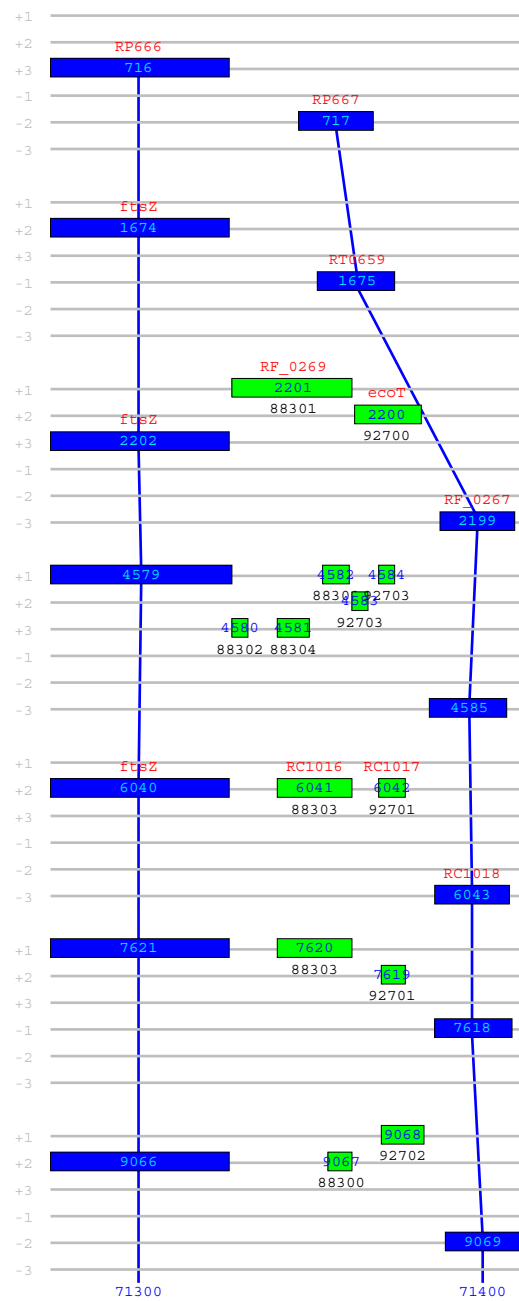

1 Rickettsia prowazekii str. Madrid E, complete genome  
 2 Rickettsia typhi str. wilmington, complete genome  
 3 Rickettsia felis URRWXCal2, complete genome  
 4 Rickettsia akari str. Hartford chromosome, whole genome shotgun sequence  
 5 Rickettsia conorii str. Malish 7, complete genome  
 6 Rickettsia sibirica 246 rsib\_agnrcr, whole genome shotgun sequence  
 7 Rickettsia rickettsii chromosome, whole genome shotgun sequence

Reg\_id: 31

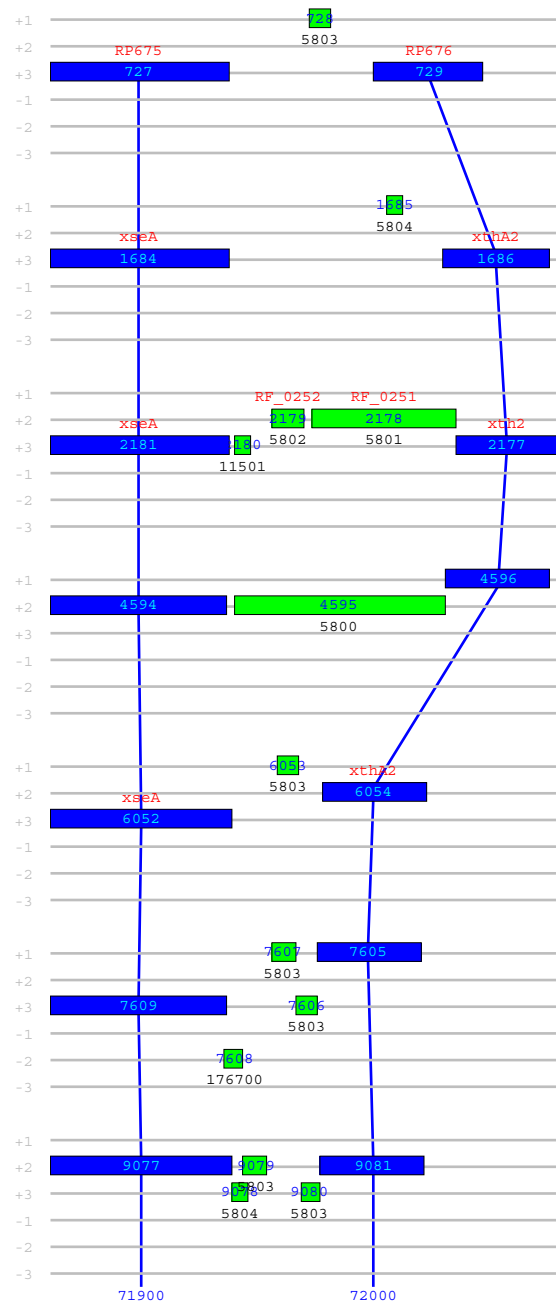

1 Rickettsia prowazekii str. Madrid E, complete genome  
 2 Rickettsia typhi str. wilmington, complete genome  
 3 Rickettsia felis URRWXCal2, complete genome  
 4 Rickettsia akari str. Hartford chromosome, whole genome shotgun sequence  
 5 Rickettsia conorii str. Malish 7, complete genome  
 6 Rickettsia sibirica 246 rsib\_agnrcr, whole genome shotgun sequence  
 7 Rickettsia rickettsii chromosome, whole genome shotgun sequence

Reg\_id: 32

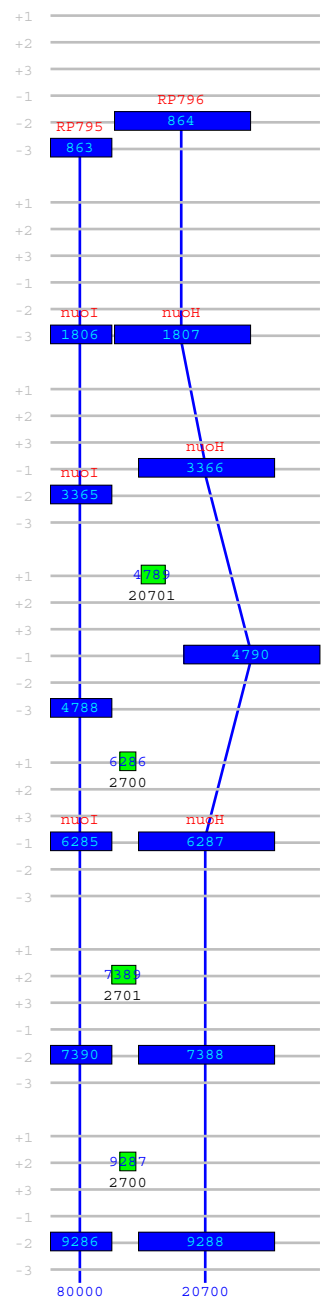



1 Rickettsia prowazekii str. Madrid E, complete genome  
 2 Rickettsia typhi str. wilmington, complete genome  
 3 Rickettsia felis URRWXCal2, complete genome  
 4 Rickettsia akari str. Hartford chromosome, whole genome shotgun sequence  
 5 Rickettsia conorii str. Malish 7, complete genome  
 6 Rickettsia sibirica 246 rsib\_agnrct, whole genome shotgun sequence  
 7 Rickettsia rickettsii chromosome, whole genome shotgun sequence

Reg\_id: 33

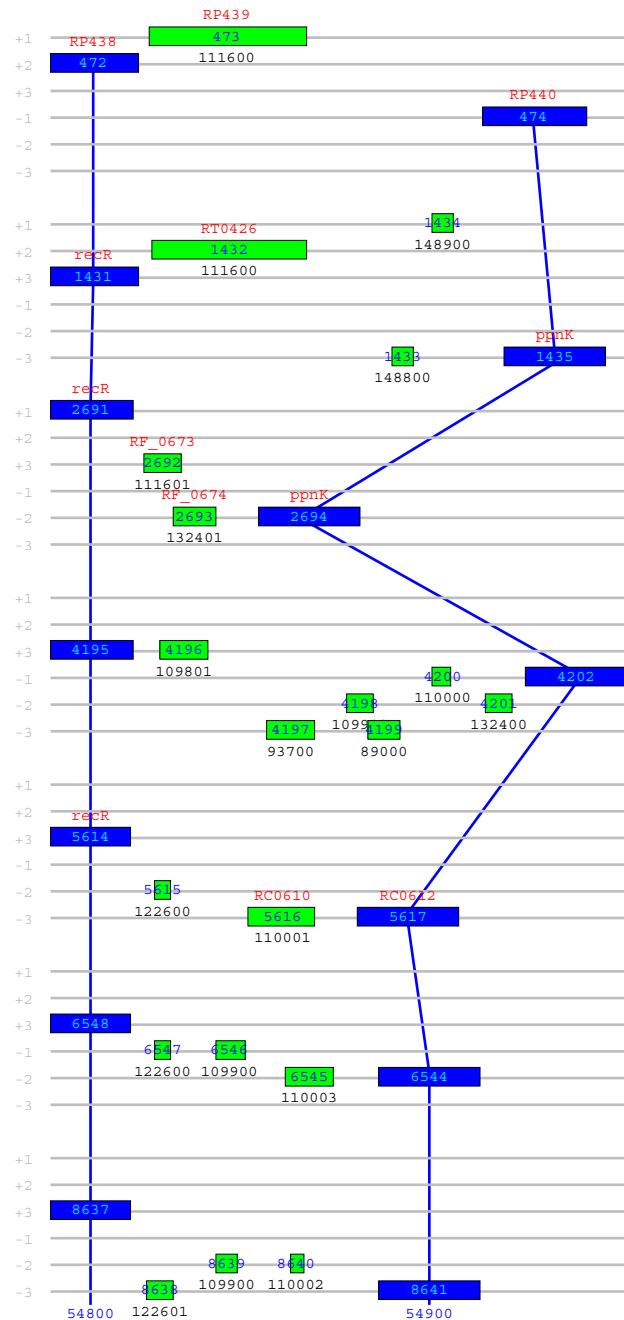

- 1 Rickettsia prowazekii str. Madrid E, complete genome
- 2 Rickettsia typhi str. wilmington, complete genome
- 3 Rickettsia felis URRWXCal2, complete genome
- 4 Rickettsia akari str. Hartford chromosome, whole genome shotgun sequence
- 5 Rickettsia conorii str. Malish 7, complete genome
- 6 Rickettsia sibirica 246 rsib\_agnrct, whole genome shotgun sequence
- 7 Rickettsia rickettsii chromosome, whole genome shotgun sequence

Reg\_id: 34

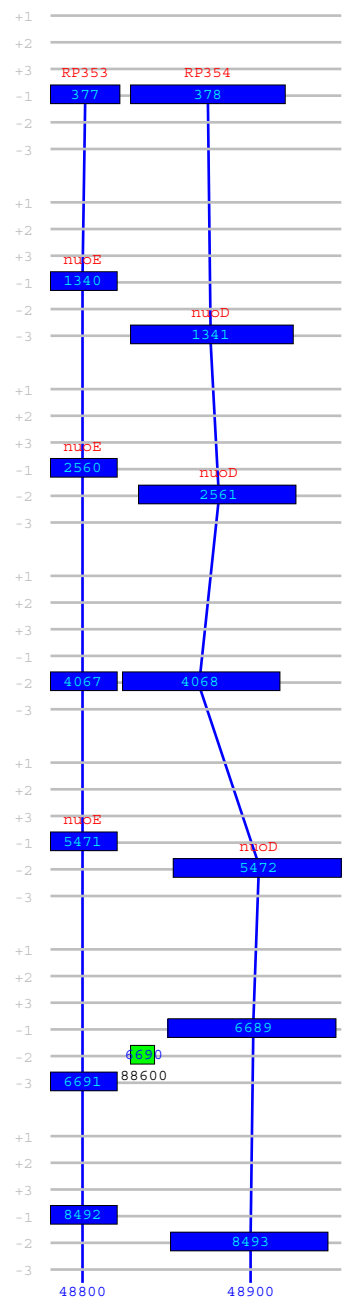

- 1 Rickettsia prowazekii str. Madrid E, complete genome
- 2 Rickettsia typhi str. wilmington, complete genome
- 3 Rickettsia felis URRWXCal2, complete genome
- 4 Rickettsia akari str. Hartford chromosome, whole genome shotgun sequence
- 5 Rickettsia conorii str. Malish 7, complete genome
- 6 Rickettsia sibirica 246 rsib\_agnrcr, whole genome shotgun sequence
- 7 Rickettsia rickettsii chromosome, whole genome shotgun sequence

Reg\_id: 36

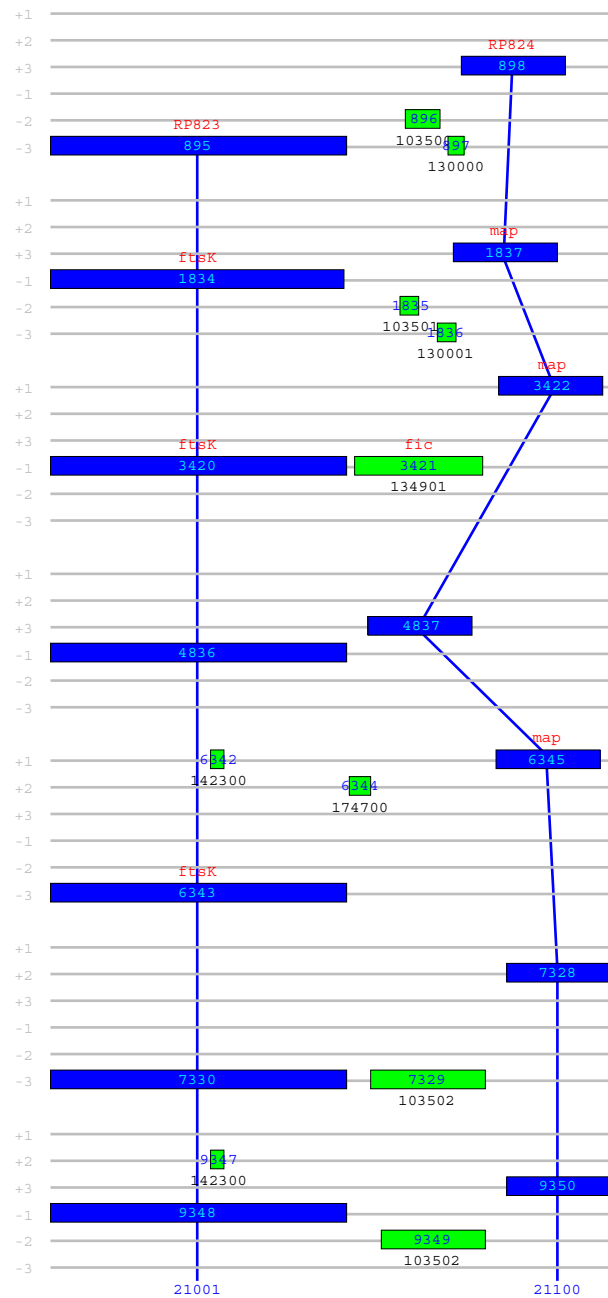

1 Rickettsia prowazekii str. Madrid E, complete genome  
 2 Rickettsia typhi str. wilmington, complete genome  
 3 Rickettsia felis URRWXCal2, complete genome  
 4 Rickettsia akari str. Hartford chromosome, whole genome shotgun sequence  
 5 Rickettsia conorii str. Malish 7, complete genome  
 6 Rickettsia sibirica 246 rsib\_agnrcr, whole genome shotgun sequence  
 7 Rickettsia rickettsii chromosome, whole genome shotgun sequence

Reg\_id: 38

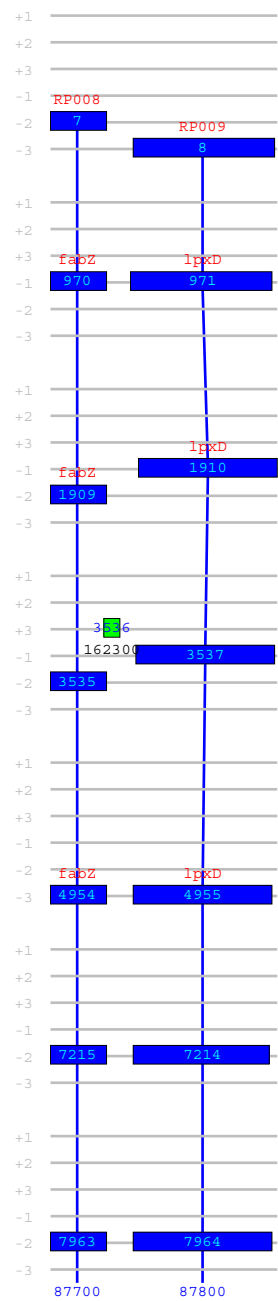

1 Rickettsia prowazekii str. Madrid E, complete genome  
 2 Rickettsia typhi str. wilmington, complete genome  
 3 Rickettsia felis URRWXCal2, complete genome  
 4 Rickettsia akari str. Hartford chromosome, whole genome shotgun sequence  
 5 Rickettsia conorii str. Malish 7, complete genome  
 6 Rickettsia sibirica 246 rsib agncrt, whole genome shotgun sequence  
 7 Rickettsia rickettsii chromosome, whole genome shotgun sequence

Reg\_id: 46

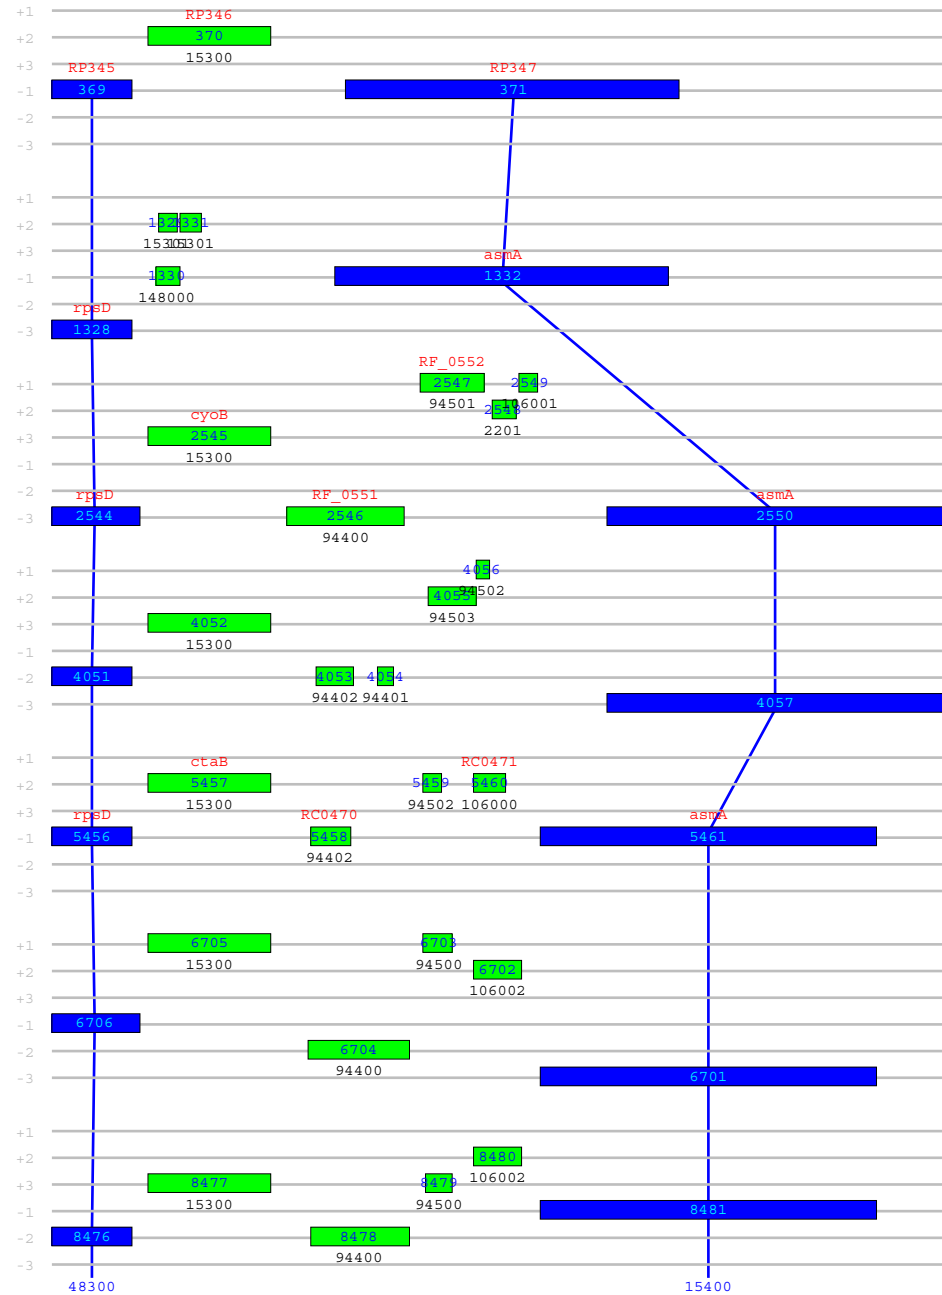

- 1 Rickettsia prowazekii str. Madrid E, complete genome
- 2 Rickettsia typhi str. wilmington, complete genome
- 3 Rickettsia felis URRWXCal2, complete genome
- 4 Rickettsia akari str. Hartford chromosome, whole genome shotgun sequence
- 5 Rickettsia conorii str. Malish 7, complete genome
- 6 Rickettsia sibirica 246 rsib\_agnrcr, whole genome shotgun sequence
- 7 Rickettsia rickettsii chromosome, whole genome shotgun sequence

Reg\_id: 48

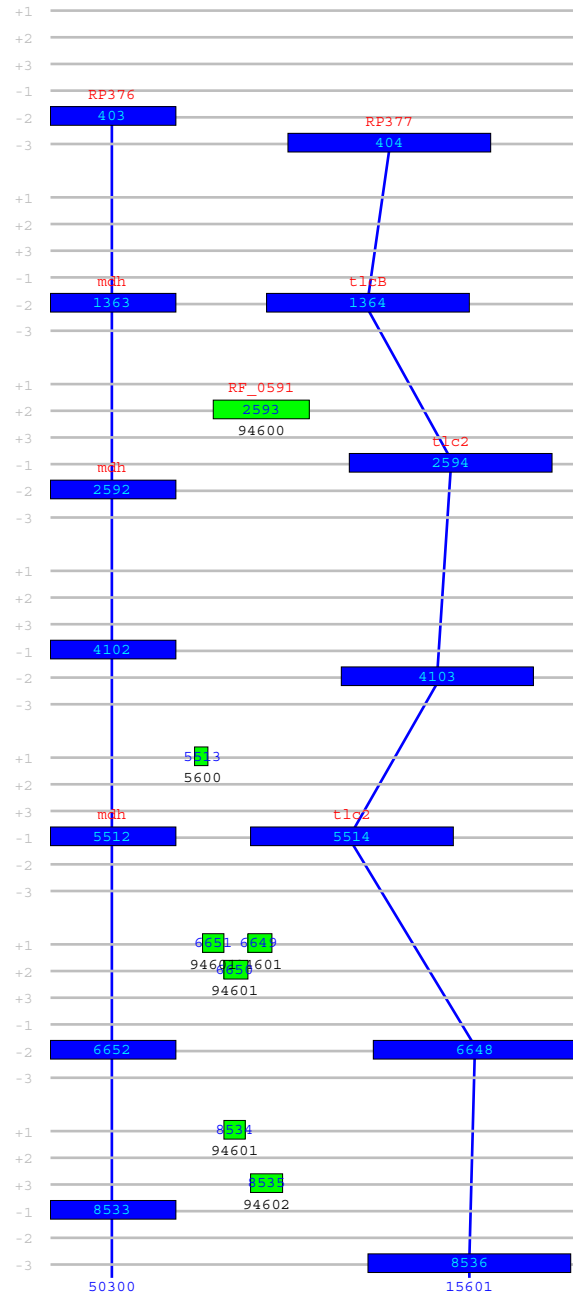

- 1 Rickettsia prowazekii str. Madrid E, complete genome
- 2 Rickettsia typhi str. wilmington, complete genome
- 3 Rickettsia felis URRWXCal2, complete genome
- 4 Rickettsia akari str. Hartford chromosome, whole genome shotgun sequence
- 5 Rickettsia conorii str. Malish 7, complete genome
- 6 Rickettsia sibirica 246 rsib\_agnrcr, whole genome shotgun sequence
- 7 Rickettsia rickettsii chromosome, whole genome shotgun sequence

Reg\_id: 49

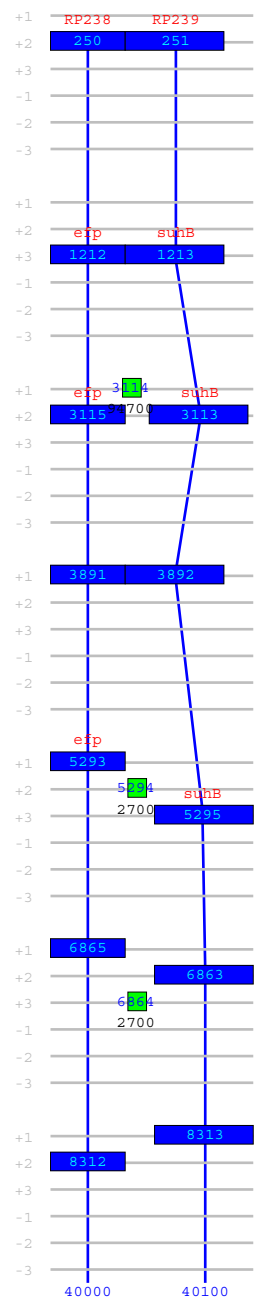

- 1 Rickettsia prowazekii str. Madrid E, complete genome
- 2 Rickettsia typhi str. wilmington, complete genome
- 3 Rickettsia felis URRWXCal2, complete genome
- 4 Rickettsia akari str. Hartford chromosome, whole genome shotgun sequence
- 5 Rickettsia conorii str. Malish 7, complete genome
- 6 Rickettsia sibirica 246 rsib\_agnrcr, whole genome shotgun sequence
- 7 Rickettsia rickettsii chromosome, whole genome shotgun sequence

Reg\_id: 50

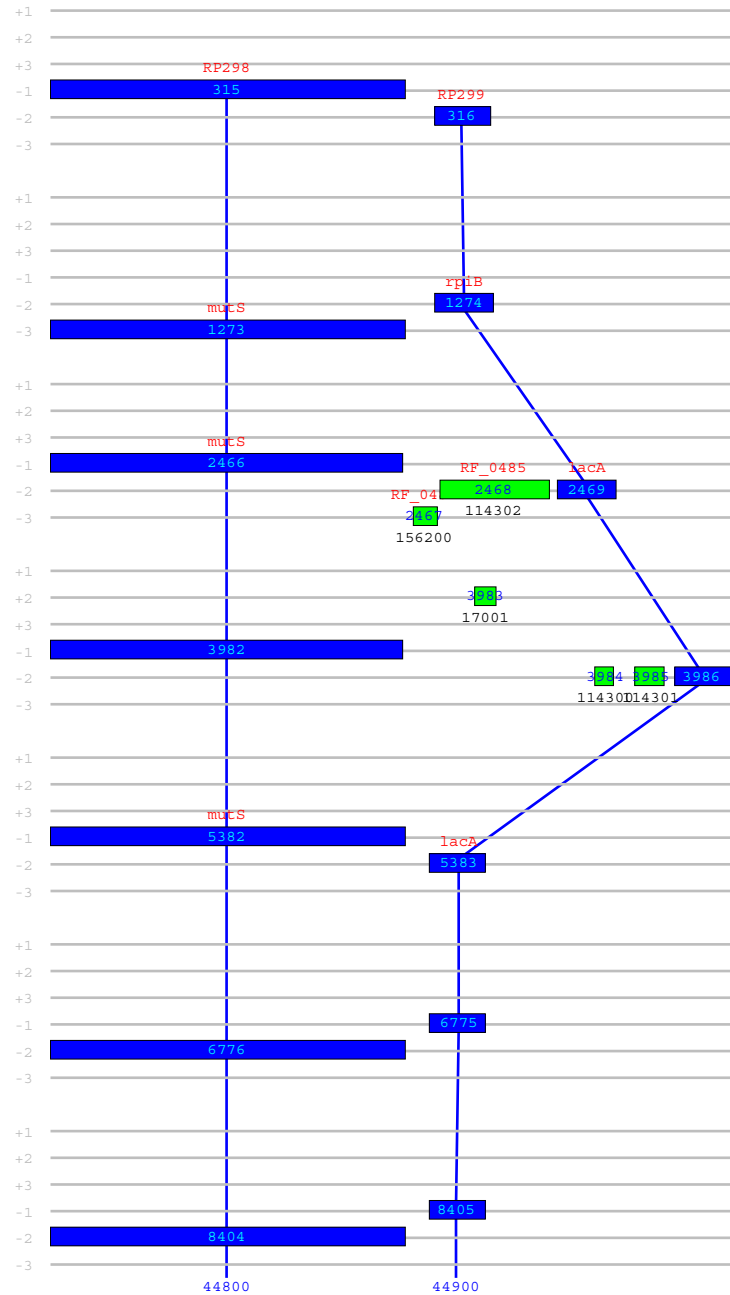



1 Rickettsia prowazekii str. Madrid E, complete genome  
 2 Rickettsia typhi str. wilmington, complete genome  
 3 Rickettsia felis URRWXCal2, complete genome  
 4 Rickettsia akari str. Hartford chromosome, whole genome shotgun sequence  
 5 Rickettsia conorii str. Malish 7, complete genome  
 6 Rickettsia sibirica 246 rsib\_agnrcr, whole genome shotgun sequence  
 7 Rickettsia rickettsii chromosome, whole genome shotgun sequence

Reg\_id: 51

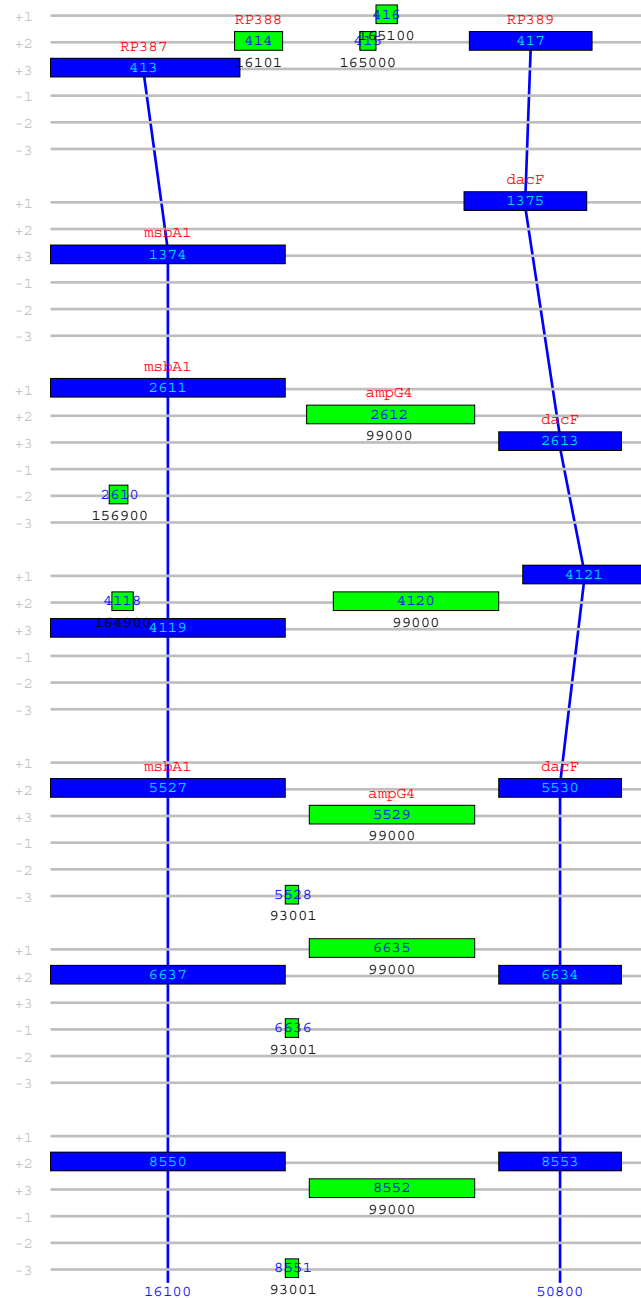

- 1 Rickettsia prowazekii str. Madrid E, complete genome
- 2 Rickettsia typhi str. wilmington, complete genome
- 3 Rickettsia felis URRWXCal2, complete genome
- 4 Rickettsia akari str. Hartford chromosome, whole genome shotgun sequence
- 5 Rickettsia conorii str. Malish 7, complete genome
- 6 Rickettsia sibirica 246 rsib\_agnrcr, whole genome shotgun sequence
- 7 Rickettsia rickettsii chromosome, whole genome shotgun sequence

Reg\_id: 53

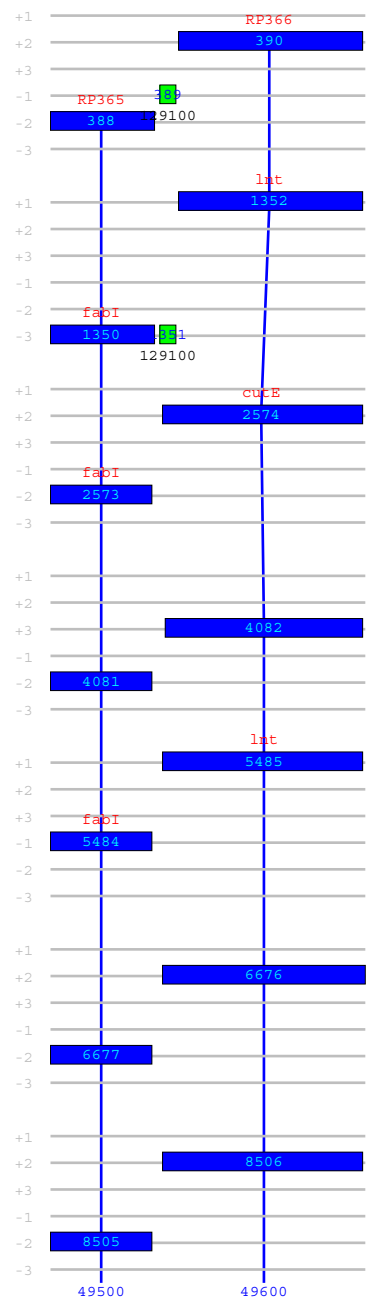

1 Rickettsia prowazekii str. Madrid E, complete genome  
 2 Rickettsia typhi str. wilmington, complete genome  
 3 Rickettsia felis URRWXCal2, complete genome  
 4 Rickettsia akari str. Hartford chromosome, whole genome shotgun sequence  
 5 Rickettsia conorii str. Malish 7, complete genome  
 6 Rickettsia sibirica 246 rsib\_agnrcrt, whole genome shotgun sequence  
 7 Rickettsia rickettsii chromosome, whole genome shotgun sequence

Reg\_id: 55

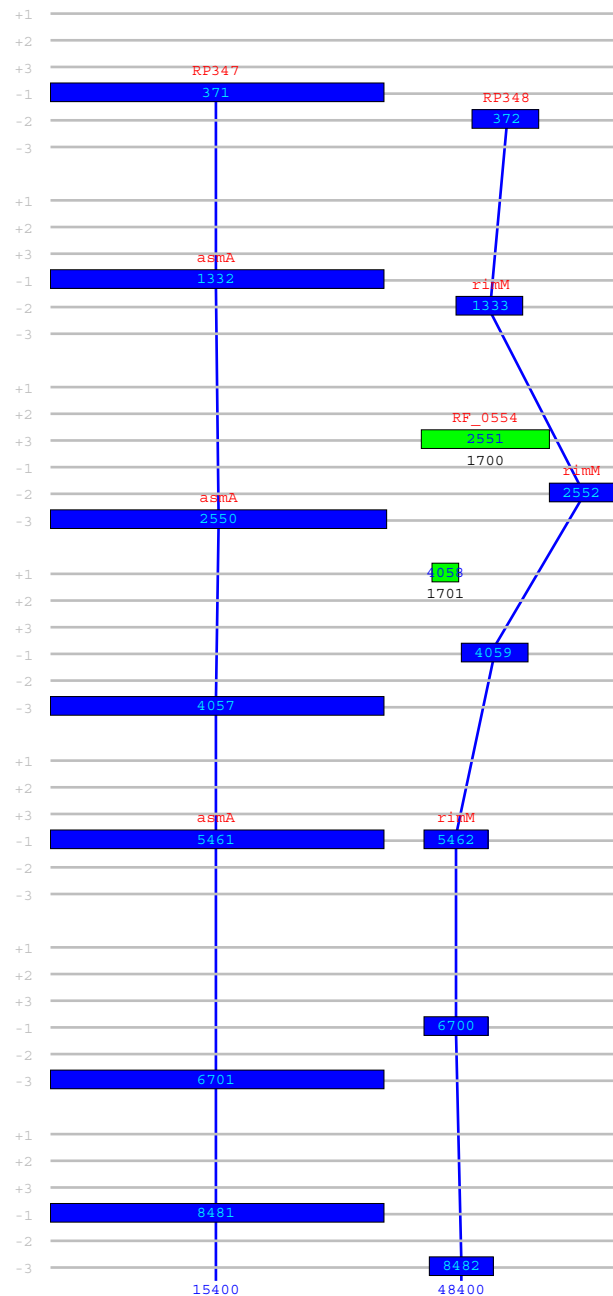

1 Rickettsia prowazekii str. Madrid E, complete genome  
 2 Rickettsia typhi str. wilmington, complete genome  
 3 Rickettsia felis URRWXCal2, complete genome  
 4 Rickettsia akari str. Hartford chromosome, whole genome shotgun sequence  
 5 Rickettsia conorii str. Malish 7, complete genome  
 6 Rickettsia sibirica 246 rsib\_agnrct, whole genome shotgun sequence  
 7 Rickettsia rickettsii chromosome, whole genome shotgun sequence

Reg\_id: 56

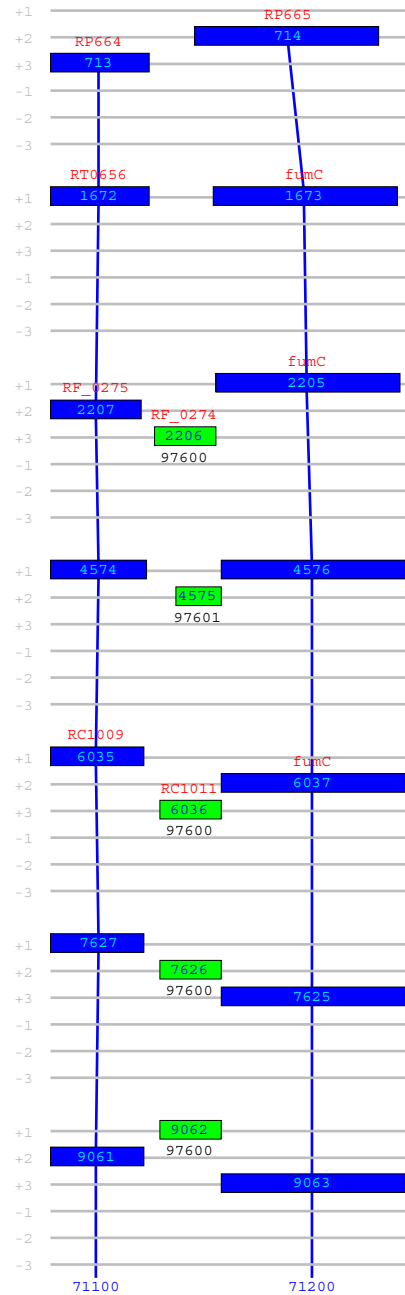

1 Rickettsia prowazekii str. Madrid E, complete genome  
 2 Rickettsia typhi str. wilmington, complete genome  
 3 Rickettsia felis URRWXCal2, complete genome  
 4 Rickettsia akari str. Hartford chromosome, whole genome shotgun sequence  
 5 Rickettsia conorii str. Malish 7, complete genome  
 6 Rickettsia sibirica 246 rsib\_agnrcr, whole genome shotgun sequence  
 7 Rickettsia rickettsii chromosome, whole genome shotgun sequence

Reg\_id: 57

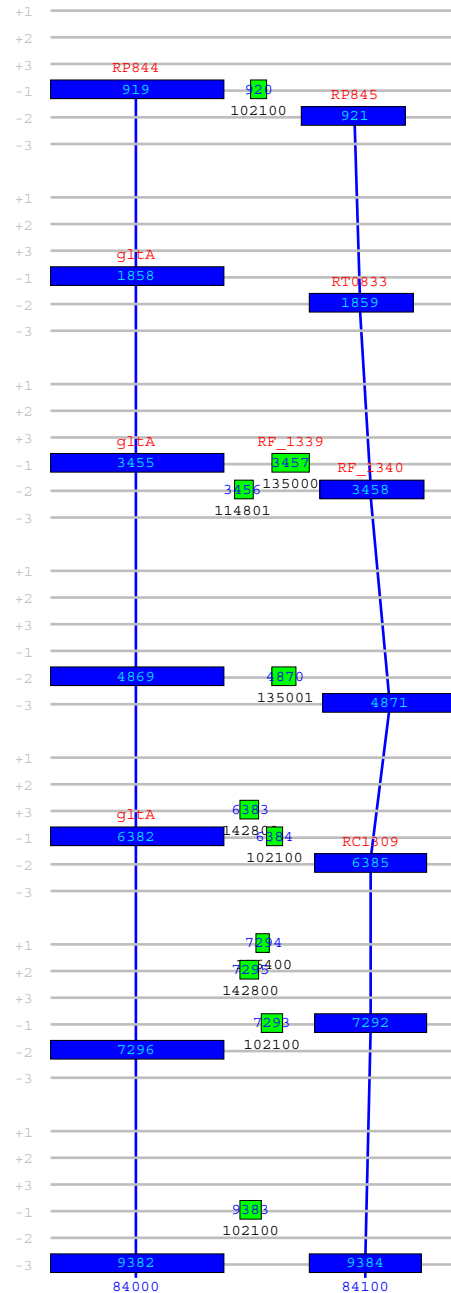

1 Rickettsia prowazekii str. Madrid E, complete genome  
 2 Rickettsia typhi str. wilmington, complete genome  
 3 Rickettsia felis URRWXCal2, complete genome  
 4 Rickettsia akari str. Hartford chromosome, whole genome shotgun sequence  
 5 Rickettsia conorii str. Malish 7, complete genome  
 6 Rickettsia sibirica 246 rsib\_agnrct, whole genome shotgun sequence  
 7 Rickettsia rickettsii chromosome, whole genome shotgun sequence

Reg\_id: 60

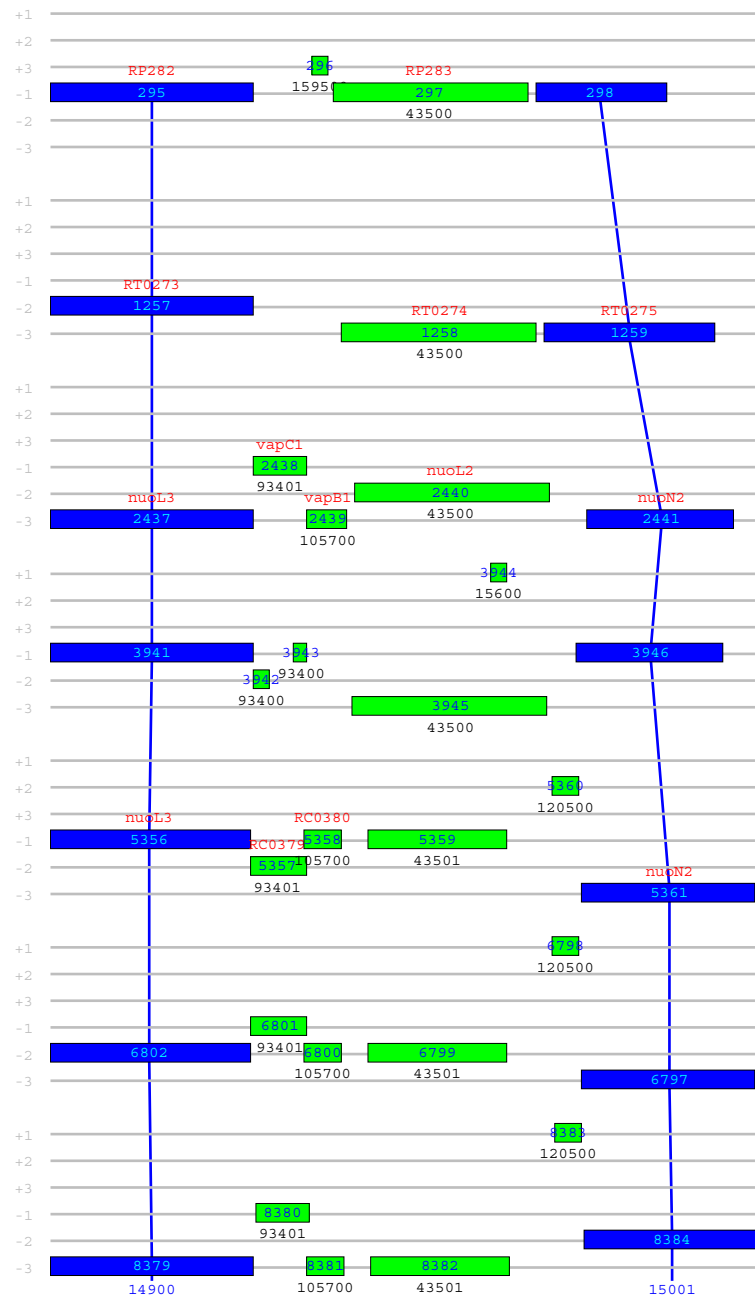

- 1 Rickettsia prowazekii str. Madrid E, complete genome
- 2 Rickettsia typhi str. wilmington, complete genome
- 3 Rickettsia felis URRWXCal2, complete genome
- 4 Rickettsia akari str. Hartford chromosome, whole genome shotgun sequence
- 5 Rickettsia conorii str. Malish 7, complete genome
- 6 Rickettsia sibirica 246 rsib\_agnrct, whole genome shotgun sequence
- 7 Rickettsia rickettsii chromosome, whole genome shotgun sequence

Reg\_id: 62

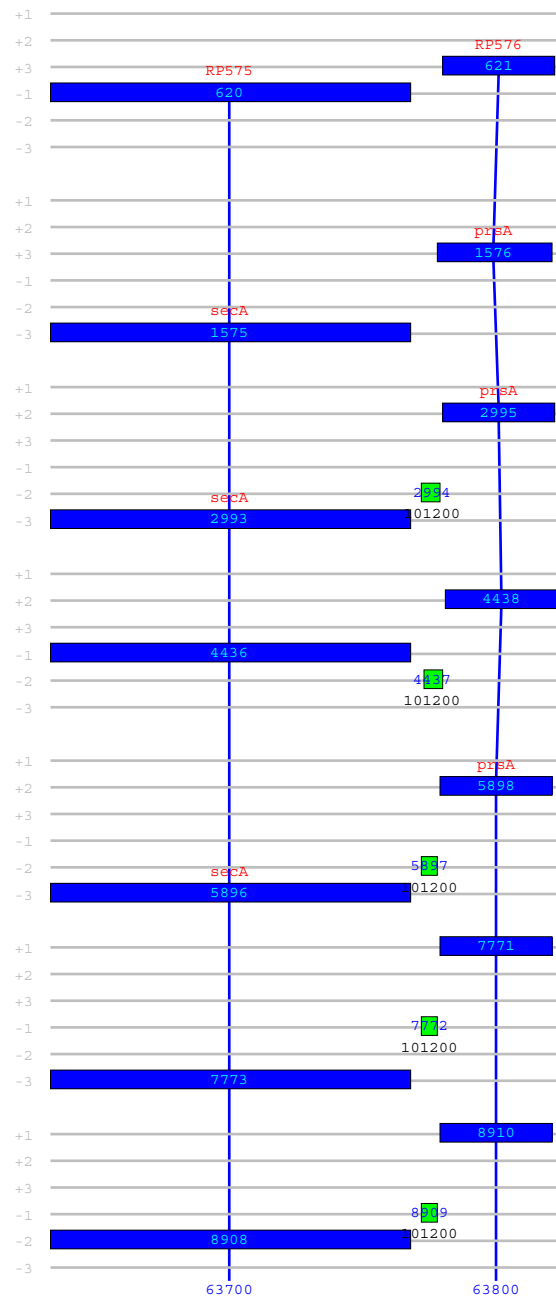

1 Rickettsia prowazekii str. Madrid E, complete genome  
 2 Rickettsia typhi str. wilmington, complete genome  
 3 Rickettsia felis URRWXCal2, complete genome  
 4 Rickettsia akari str. Hartford chromosome, whole genome shotgun sequence  
 5 Rickettsia conorii str. Malish 7, complete genome  
 6 Rickettsia sibirica 246 rsib agncrt, whole genome shotgun sequence  
 7 Rickettsia rickettsii chromosome, whole genome shotgun sequence

Reg\_id: 65

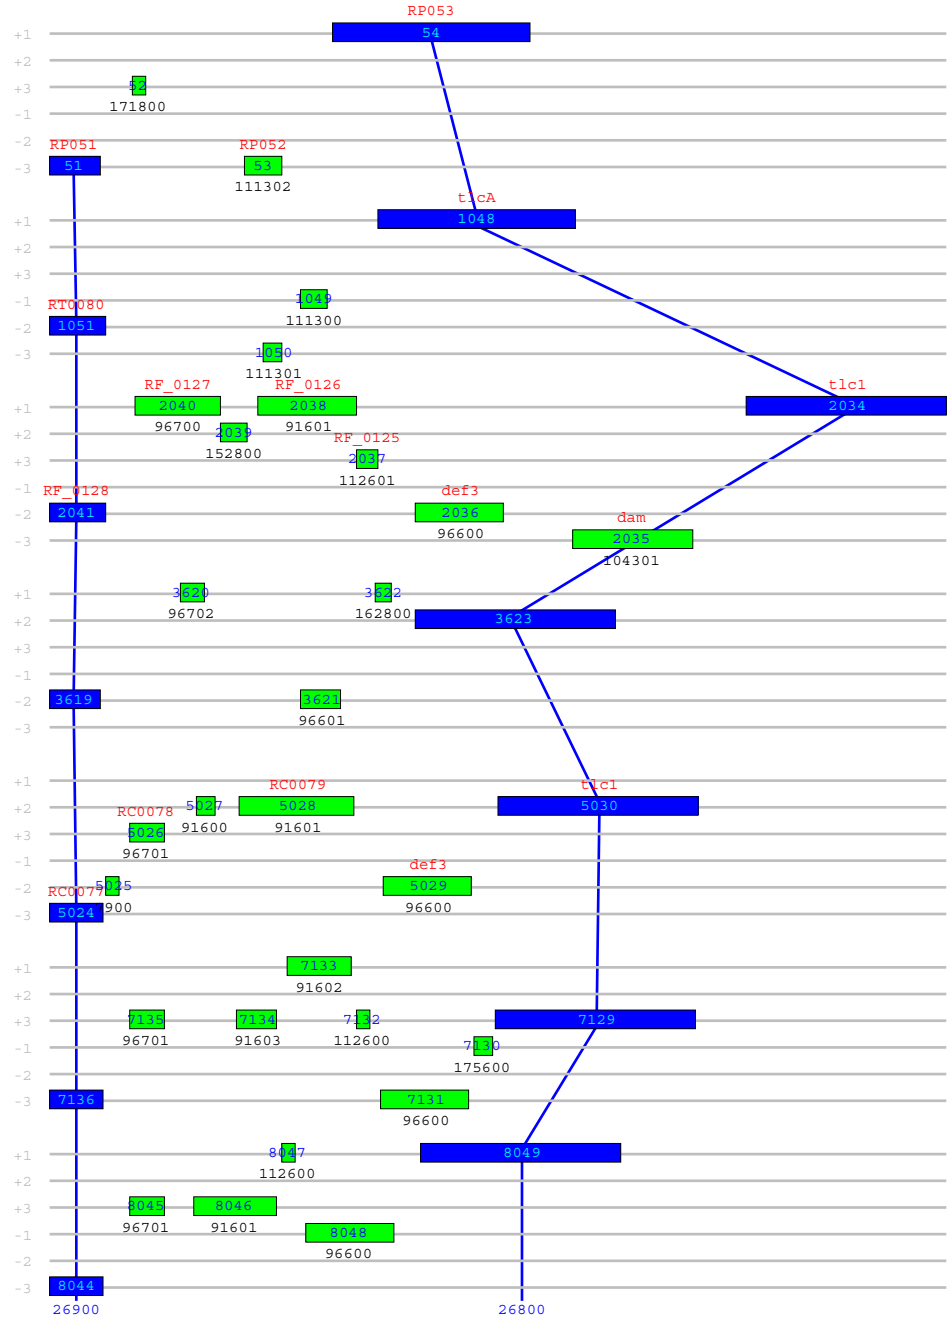



1 Rickettsia prowazekii str. Madrid E, complete genome  
 2 Rickettsia typhi str. wilmington, complete genome  
 3 Rickettsia felis URRWXCal2, complete genome  
 4 Rickettsia akari str. Hartford chromosome, whole genome shotgun sequence  
 5 Rickettsia conorii str. Malish 7, complete genome  
 6 Rickettsia sibirica 246 rsib\_agnrct, whole genome shotgun sequence  
 7 Rickettsia rickettsii chromosome, whole genome shotgun sequence

Reg\_id: 67

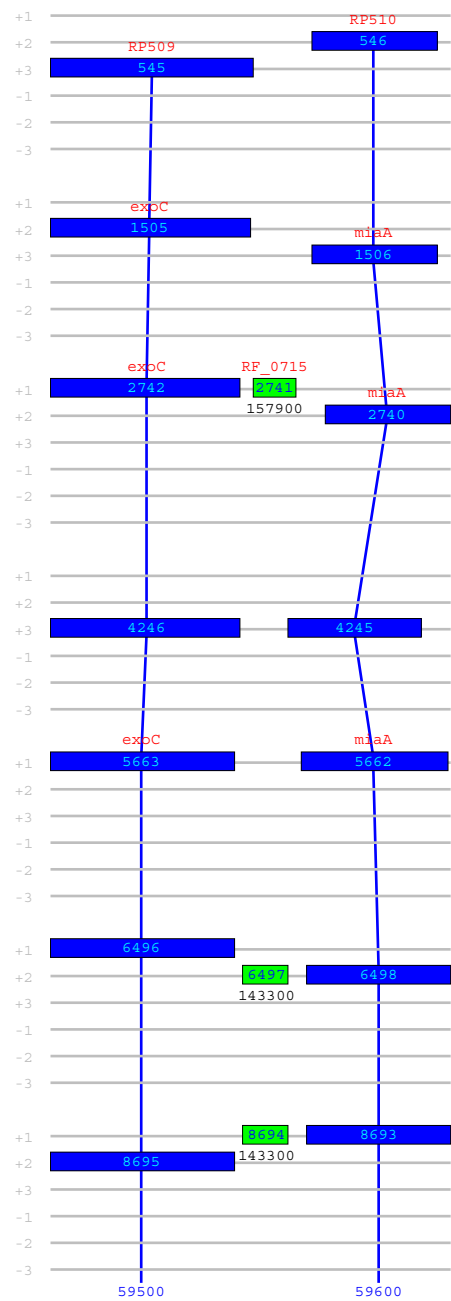

1 Rickettsia prowazekii str. Madrid E, complete genome  
 2 Rickettsia typhi str. wilmington, complete genome  
 3 Rickettsia felis URRWXCal2, complete genome  
 4 Rickettsia akari str. Hartford chromosome, whole genome shotgun sequence  
 5 Rickettsia conorii str. Malish 7, complete genome  
 6 Rickettsia sibirica 246 rsib\_agnrct, whole genome shotgun sequence  
 7 Rickettsia rickettsii chromosome, whole genome shotgun sequence

Reg\_id: 71

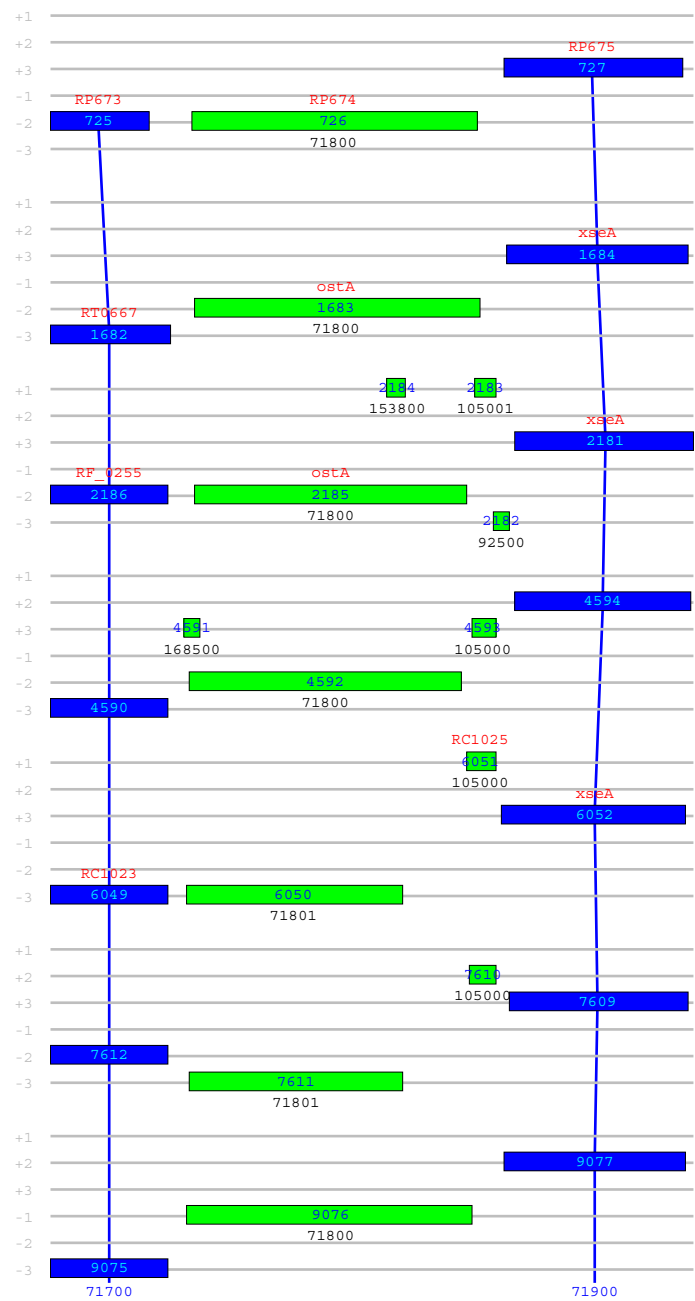

- 1 Rickettsia prowazekii str. Madrid E, complete genome
- 2 Rickettsia typhi str. wilmington, complete genome
- 3 Rickettsia felis URRWXCal2, complete genome
- 4 Rickettsia akari str. Hartford chromosome, whole genome shotgun sequence
- 5 Rickettsia conorii str. Malish 7, complete genome
- 6 Rickettsia sibirica 246 rsib\_agnrcrt, whole genome shotgun sequence
- 7 Rickettsia rickettsii chromosome, whole genome shotgun sequence

Reg\_id: 72

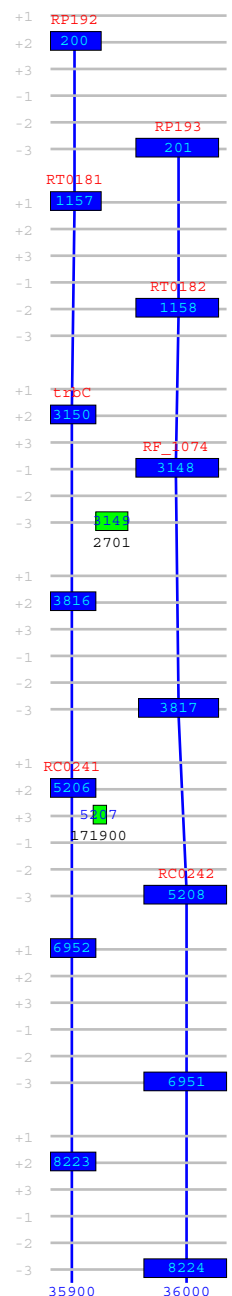

- 1 Rickettsia prowazekii str. Madrid E, complete genome
- 2 Rickettsia typhi str. wilmington, complete genome
- 3 Rickettsia felis URRWXCal2, complete genome
- 4 Rickettsia akarii str. Hartford chromosome, whole genome shotgun sequence
- 5 Rickettsia conorii str. Malish 7, complete genome
- 6 Rickettsia sibirica 246 rsib\_agnrcr, whole genome shotgun sequence
- 7 Rickettsia rickettsii chromosome, whole genome shotgun sequence

Reg\_id: 73

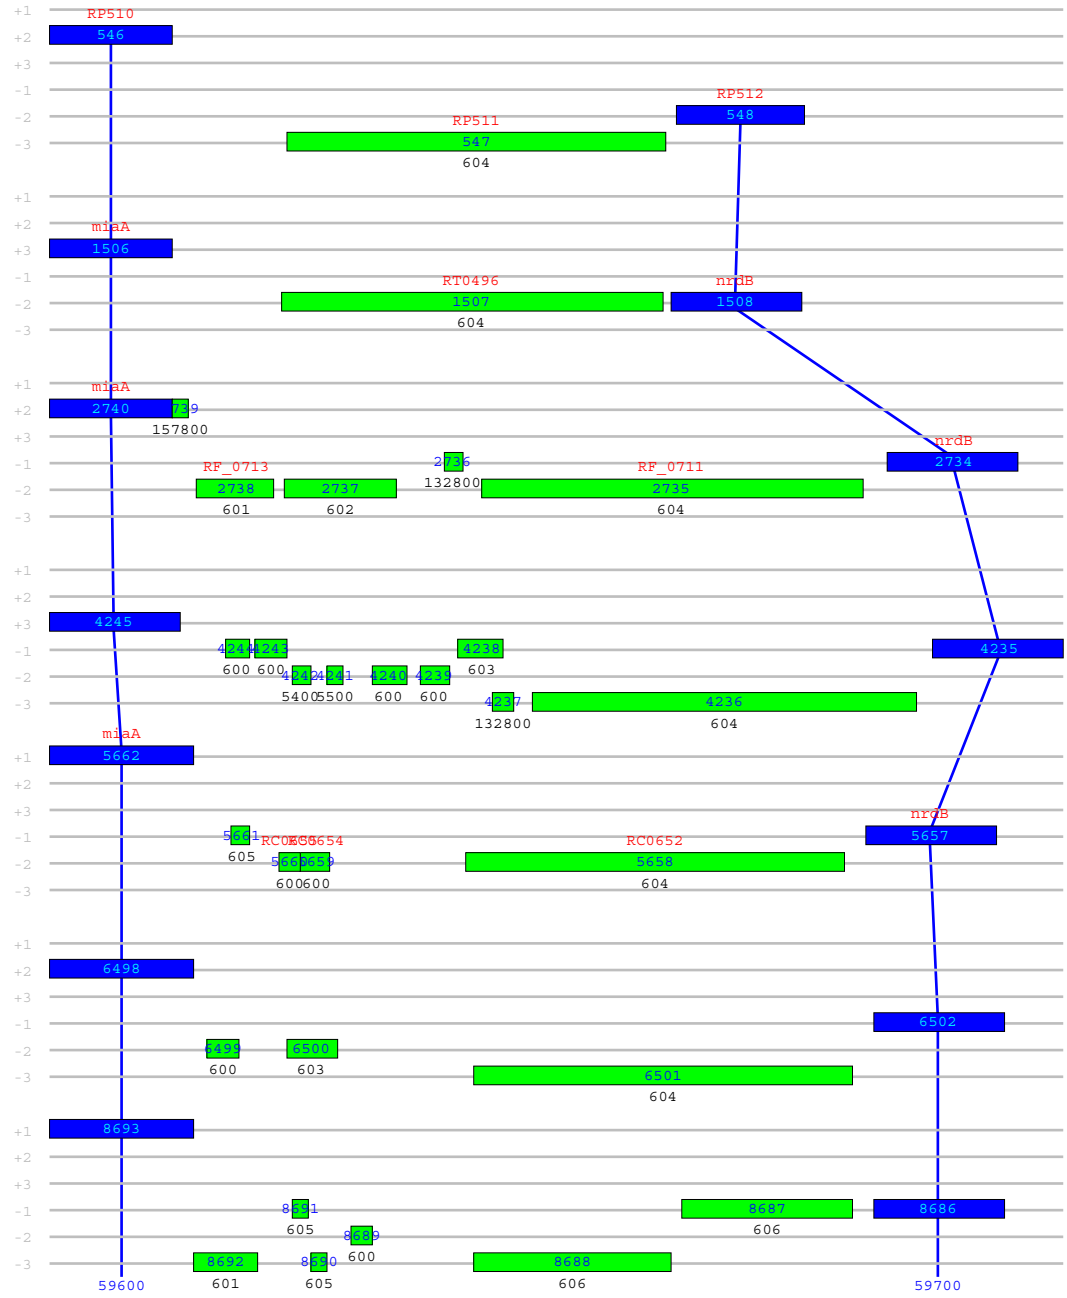

1 Rickettsia prowazekii str. Madrid E, complete genome  
 2 Rickettsia typhi str. wilmington, complete genome  
 3 Rickettsia felis URRWXCal2, complete genome  
 4 Rickettsia akari str. Hartford chromosome, whole genome shotgun sequence  
 5 Rickettsia conorii str. Malish 7, complete genome  
 6 Rickettsia sibirica 246 rsib\_agnrcr, whole genome shotgun sequence  
 7 Rickettsia rickettsii chromosome, whole genome shotgun sequence

Reg\_id: 75

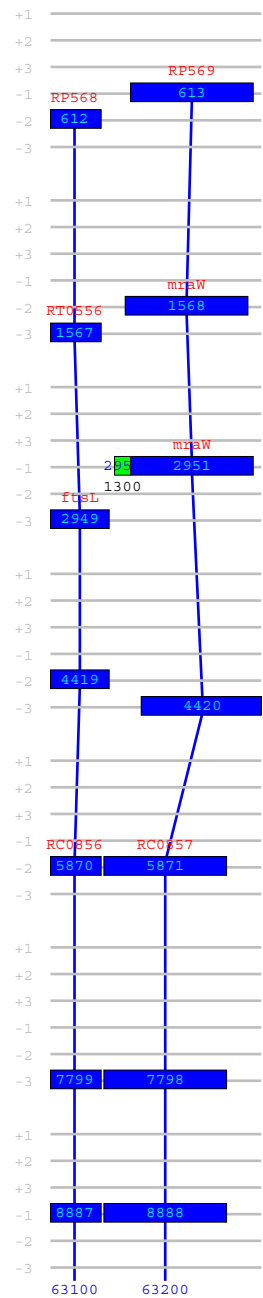

- 1 Rickettsia prowazekii str. Madrid E, complete genome
- 2 Rickettsia typhi str. wilmington, complete genome
- 3 Rickettsia felis URRWXCal2, complete genome
- 4 Rickettsia akari str. Hartford chromosome, whole genome shotgun sequence
- 5 Rickettsia conorii str. Malish 7, complete genome
- 6 Rickettsia sibirica 246 rsib\_agnrcr, whole genome shotgun sequence
- 7 Rickettsia rickettsii chromosome, whole genome shotgun sequence

Reg\_id: 76

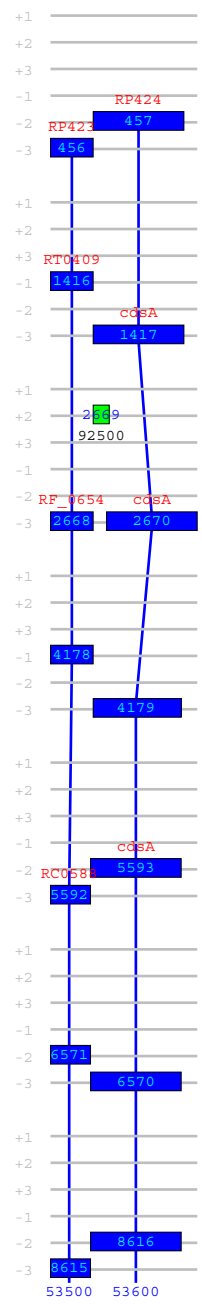

- 1 Rickettsia prowazekii str. Madrid E, complete genome
- 2 Rickettsia typhi str. wilmington, complete genome
- 3 Rickettsia felis URRWXCal2, complete genome
- 4 Rickettsia akari str. Hartford chromosome, whole genome shotgun sequence
- 5 Rickettsia conorii str. Malish 7, complete genome
- 6 Rickettsia sibirica 246 rsib\_agnrct, whole genome shotgun sequence
- 7 Rickettsia rickettsii chromosome, whole genome shotgun sequence

Reg\_id: 79

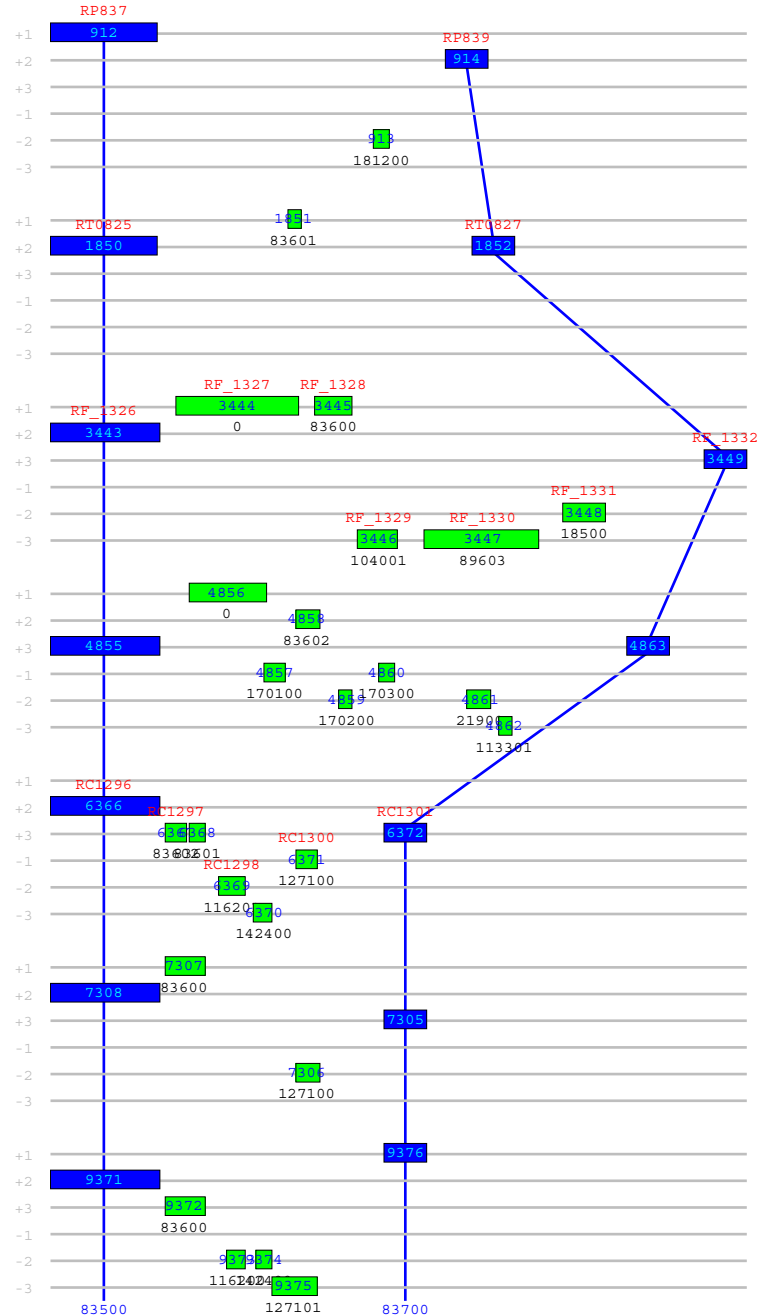

- 1 Rickettsia prowazekii str. Madrid E, complete genome
- 2 Rickettsia typhi str. wilmington, complete genome
- 3 Rickettsia felis URRWXCal2, complete genome
- 4 Rickettsia akari str. Hartford chromosome, whole genome shotgun sequence
- 5 Rickettsia conorii str. Malish 7, complete genome
- 6 Rickettsia sibirica 246 rsib\_agnrcr, whole genome shotgun sequence
- 7 Rickettsia rickettsii chromosome, whole genome shotgun sequence

Reg\_id: 80

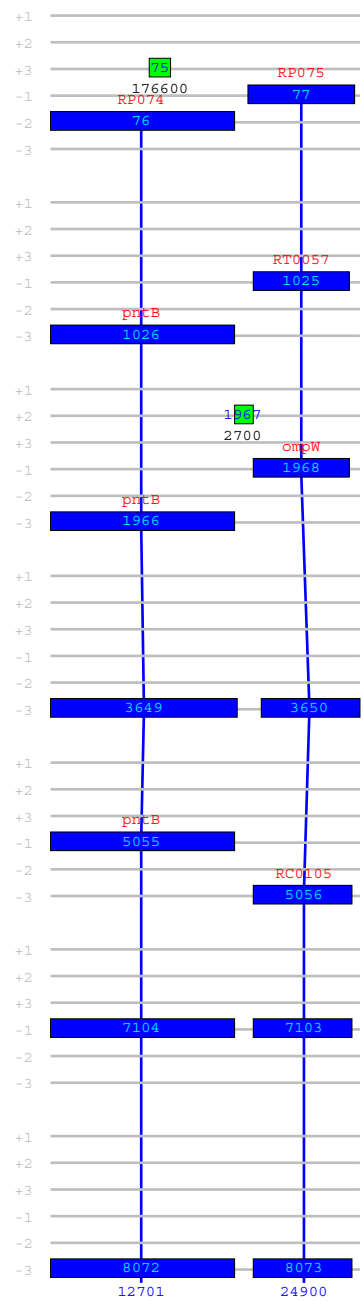



1 Rickettsia prowazekii str. Madrid E, complete genome  
 2 Rickettsia typhi str. wilmington, complete genome  
 3 Rickettsia felis URRWXCal2, complete genome  
 4 Rickettsia akari str. Hartford chromosome, whole genome shotgun sequence  
 5 Rickettsia conorii str. Malish 7, complete genome  
 6 Rickettsia sibirica 246 rsib\_agnrct, whole genome shotgun sequence  
 7 Rickettsia rickettsii chromosome, whole genome shotgun sequence

Reg\_id: 87

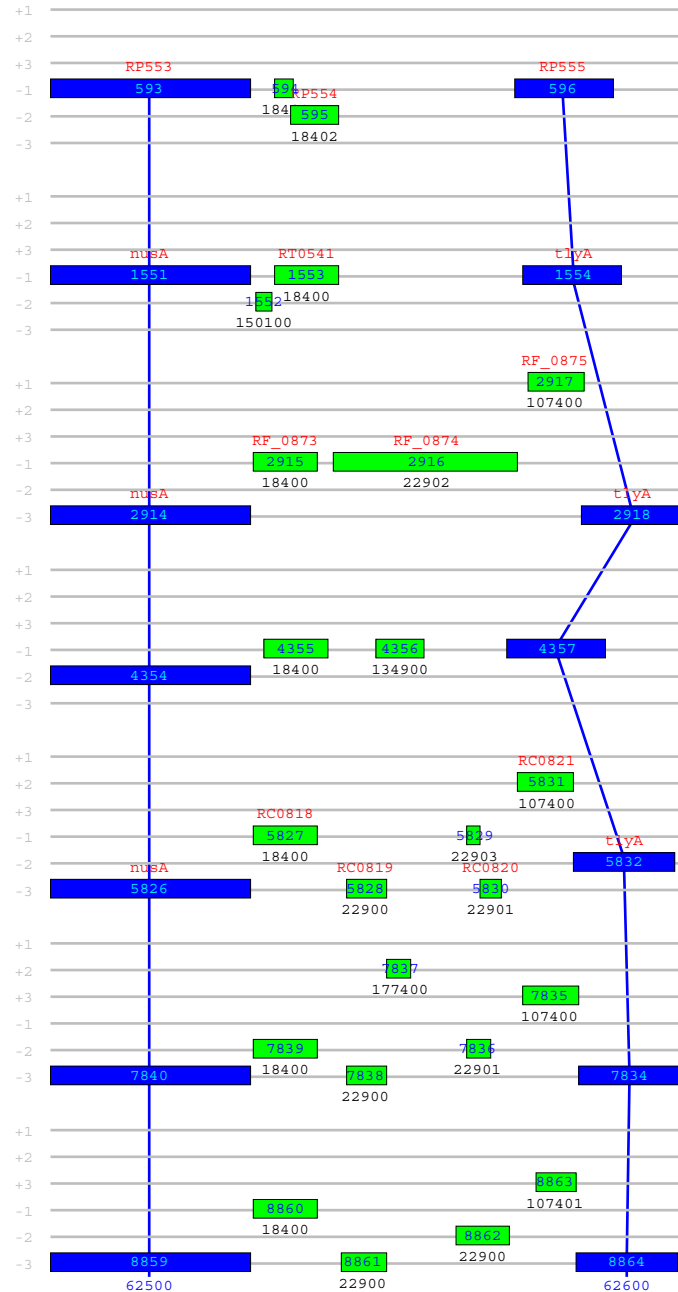

1 Rickettsia prowazekii str. Madrid E, complete genome  
 2 Rickettsia typhi str. wilmington, complete genome  
 3 Rickettsia felis URRWXCal2, complete genome  
 4 Rickettsia akari str. Hartford chromosome, whole genome shotgun sequence  
 5 Rickettsia conorii str. Malish 7, complete genome  
 6 Rickettsia sibirica 246 rsib\_agnrcr, whole genome shotgun sequence  
 7 Rickettsia rickettsii chromosome, whole genome shotgun sequence

Reg\_id: 91

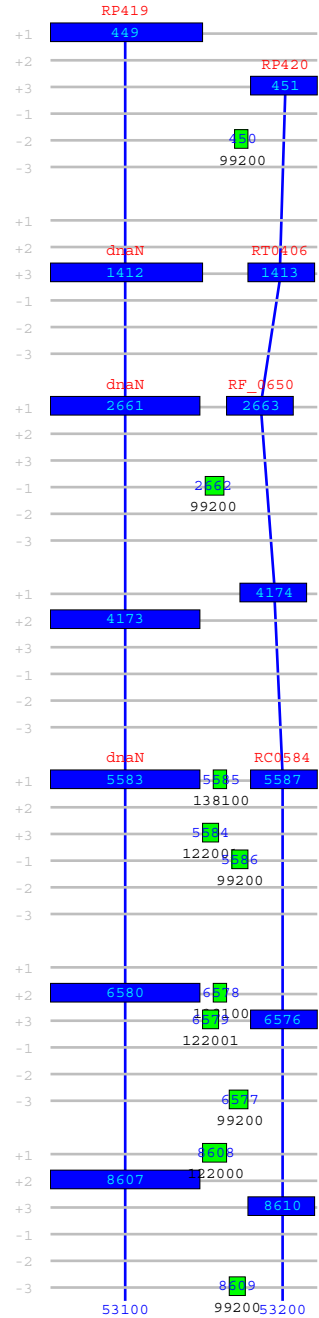

- 1 Rickettsia prowazekii str. Madrid E, complete genome
- 2 Rickettsia typhi str. wilmington, complete genome
- 3 Rickettsia felis URRWXCal2, complete genome
- 4 Rickettsia akari str. Hartford chromosome, whole genome shotgun sequence
- 5 Rickettsia conorii str. Malish 7, complete genome
- 6 Rickettsia sibirica 246 rsib\_agnrcr, whole genome shotgun sequence
- 7 Rickettsia rickettsii chromosome, whole genome shotgun sequence

Reg\_id: 92

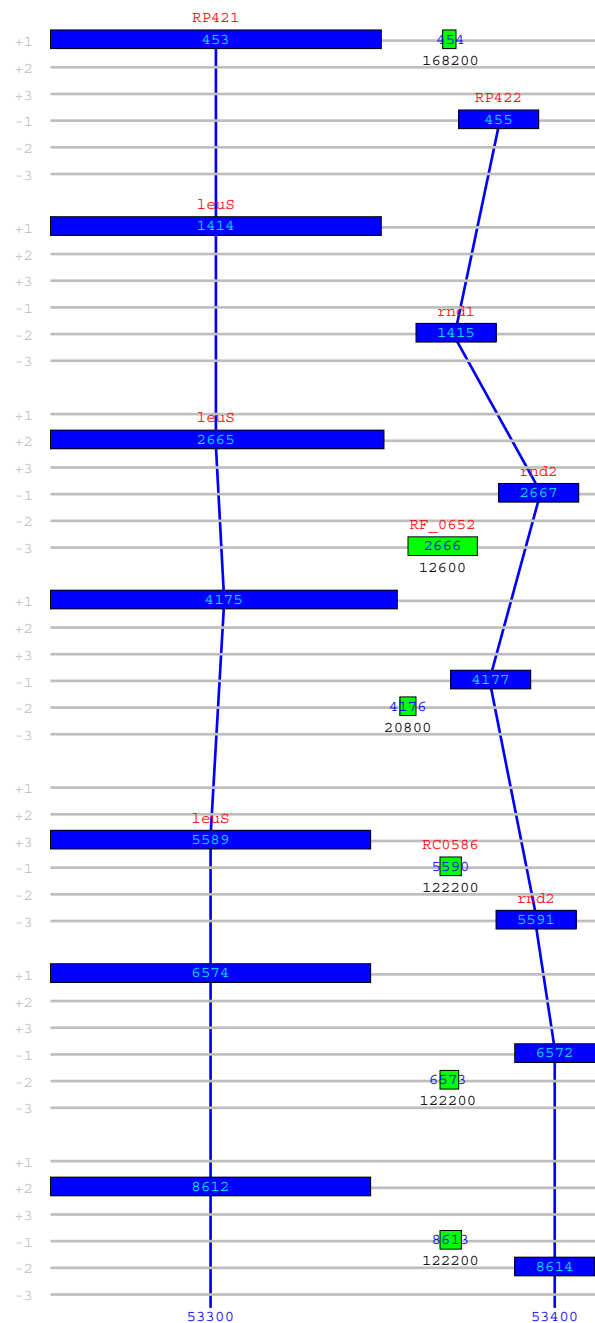

- 1 Rickettsia prowazekii str. Madrid E, complete genome
- 2 Rickettsia typhi str. wilmington, complete genome
- 3 Rickettsia felis URRWXCal2, complete genome
- 4 Rickettsia akari str. Hartford chromosome, whole genome shotgun sequence
- 5 Rickettsia conorii str. Malish 7, complete genome
- 6 Rickettsia sibirica 246 rsib\_agnrcr, whole genome shotgun sequence
- 7 Rickettsia rickettsii chromosome, whole genome shotgun sequence

Reg\_id: 93

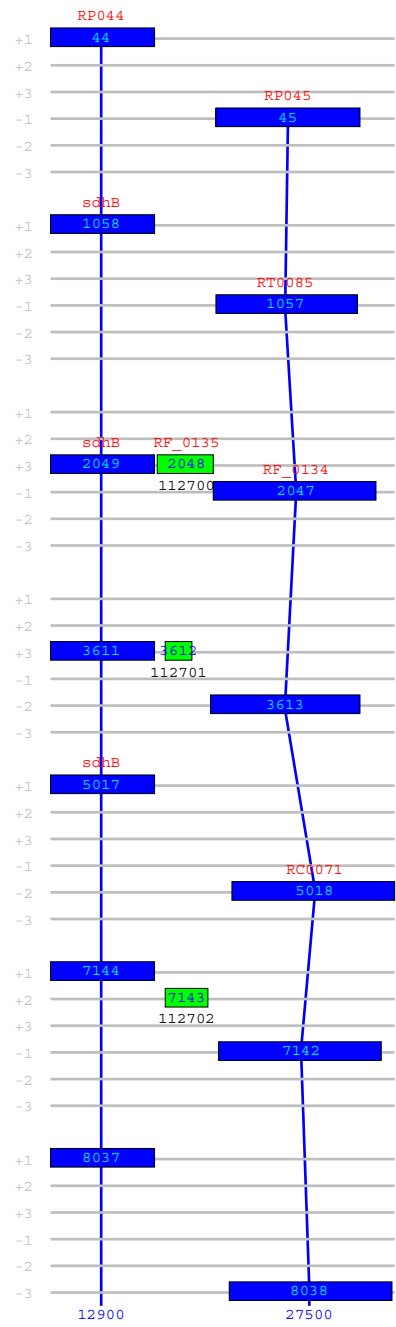

1 Rickettsia prowazekii str. Madrid E, complete genome  
 2 Rickettsia typhi str. wilmington, complete genome  
 3 Rickettsia felis URRWXCal2, complete genome  
 4 Rickettsia akari str. Hartford chromosome, whole genome shotgun sequence  
 5 Rickettsia conorii str. Malish 7, complete genome  
 6 Rickettsia sibirica 246 rsib\_agnrcr, whole genome shotgun sequence  
 7 Rickettsia rickettsii chromosome, whole genome shotgun sequence

Reg\_id: 95

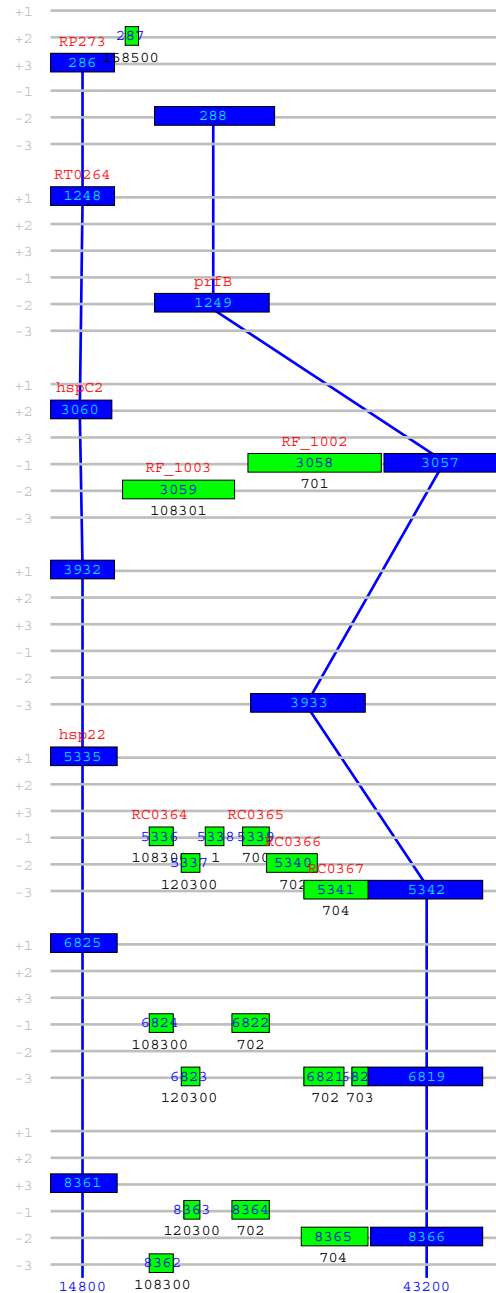

1 Rickettsia prowazekii str. Madrid E, complete genome  
 2 Rickettsia typhi str. wilmington, complete genome  
 3 Rickettsia felis URRWXCa2, complete genome  
 4 Rickettsia akari str. Hartford chromosome, whole genome shotgun sequence  
 5 Rickettsia conorii str. Malish 7, complete genome  
 6 Rickettsia sibirica 246 rsib\_agnrct, whole genome shotgun sequence  
 7 Rickettsia rickettsii chromosome, whole genome shotgun sequence

Reg\_id: 98

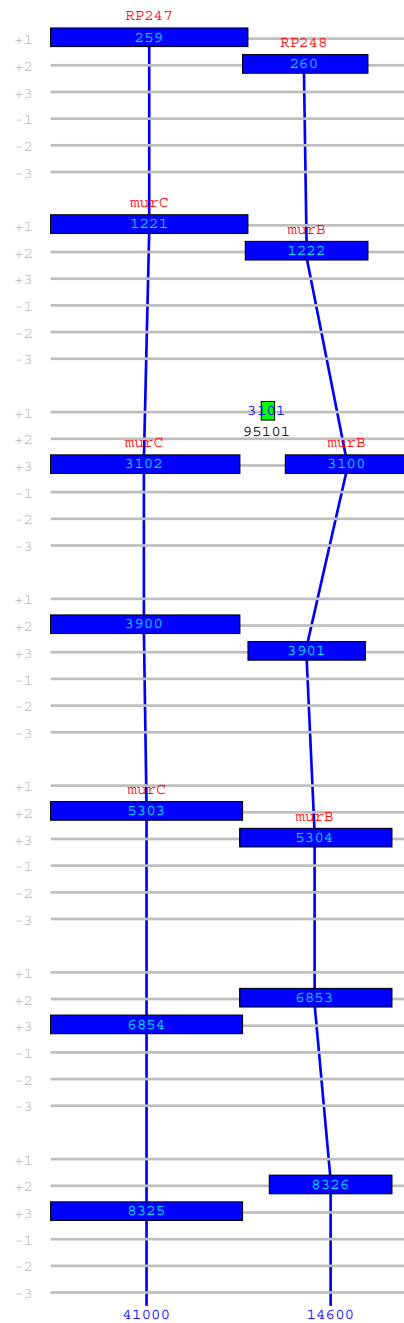

- 1 Rickettsia prowazekii str. Madrid E, complete genome
- 2 Rickettsia typhi str. wilmington, complete genome
- 3 Rickettsia felis URRWXCal2, complete genome
- 4 Rickettsia akari str. Hartford chromosome, whole genome shotgun sequence
- 5 Rickettsia conorii str. Malish 7, complete genome
- 6 Rickettsia sibirica 246 rsib\_agnrct, whole genome shotgun sequence
- 7 Rickettsia rickettsii chromosome, whole genome shotgun sequence

Reg\_id: 100

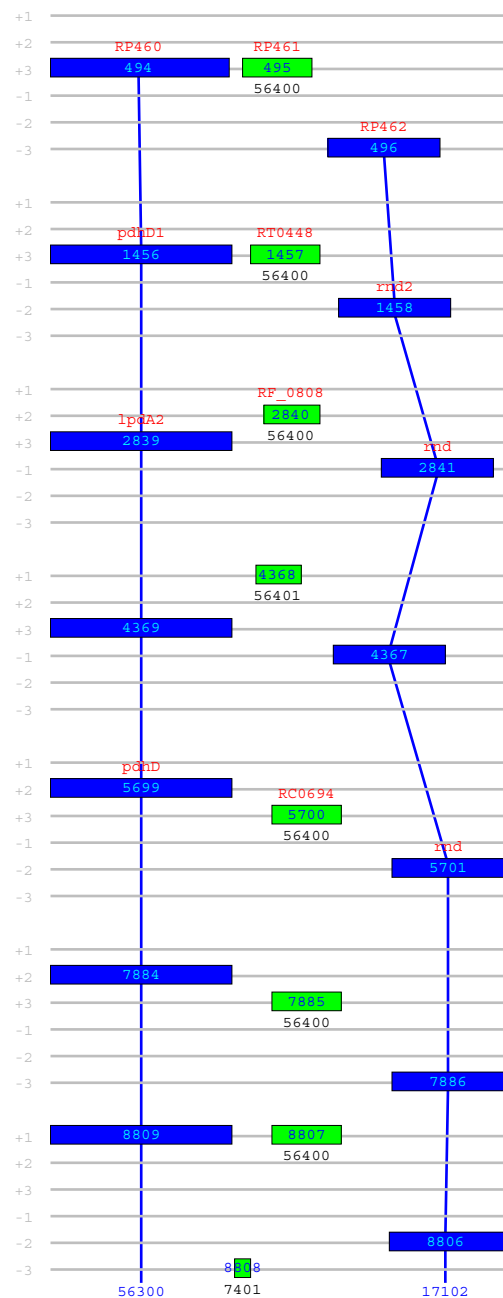

1 Rickettsia prowazekii str. Madrid E, complete genome  
 2 Rickettsia typhi str. wilmington, complete genome  
 3 Rickettsia felis URRWXCal2, complete genome  
 4 Rickettsia akari str. Hartford chromosome, whole genome shotgun sequence  
 5 Rickettsia conorii str. Malish 7, complete genome  
 6 Rickettsia sibirica 246 rsib\_agnrcrt, whole genome shotgun sequence  
 7 Rickettsia rickettsii chromosome, whole genome shotgun sequence

Reg\_id: 102

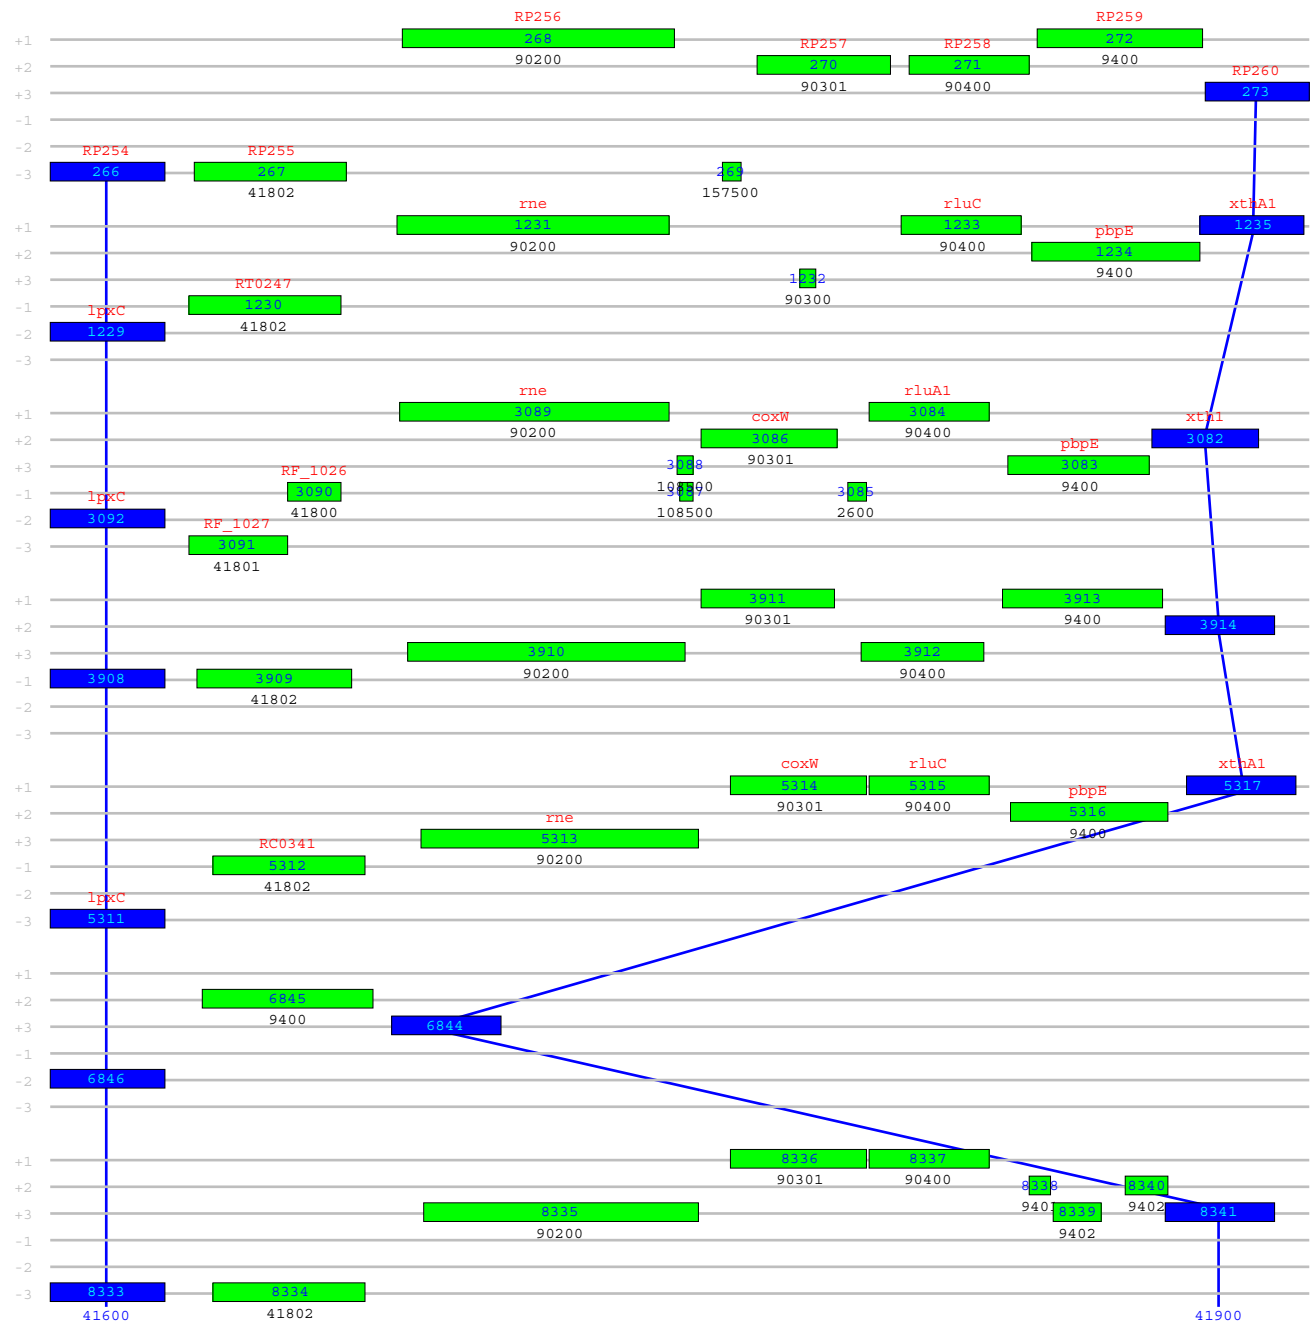



1 Rickettsia prowazekii str. Madrid E, complete genome  
 2 Rickettsia typhi str. wilmington, complete genome  
 3 Rickettsia felis URRWXCal2, complete genome  
 4 Rickettsia akari str. Hartford chromosome, whole genome shotgun sequence  
 5 Rickettsia conorii str. Malish 7, complete genome  
 6 Rickettsia sibirica 246 rsib\_agnrct, whole genome shotgun sequence  
 7 Rickettsia rickettsii chromosome, whole genome shotgun sequence

Reg\_id: 103

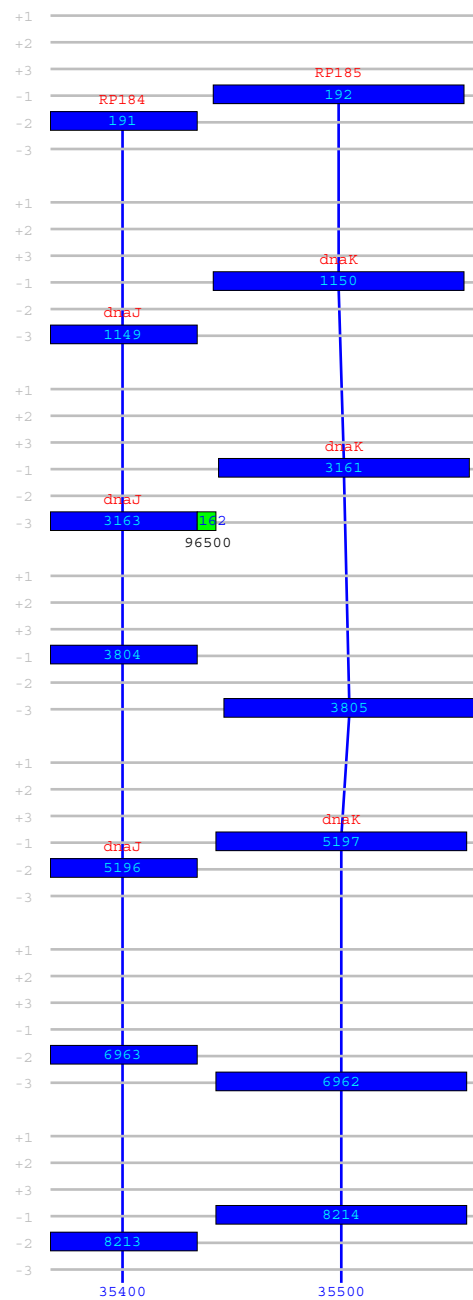

1 Rickettsia prowazekii str. Madrid E, complete genome  
 2 Rickettsia typhi str. wilmington, complete genome  
 3 Rickettsia felis URRWXCal2, complete genome  
 4 Rickettsia akari str. Hartford chromosome, whole genome shotgun sequence  
 5 Rickettsia conorii str. Malish 7, complete genome  
 6 Rickettsia sibirica 246 rsib\_agnrcrt, whole genome shotgun sequence  
 7 Rickettsia rickettsii chromosome, whole genome shotgun sequence

Reg\_id: 104

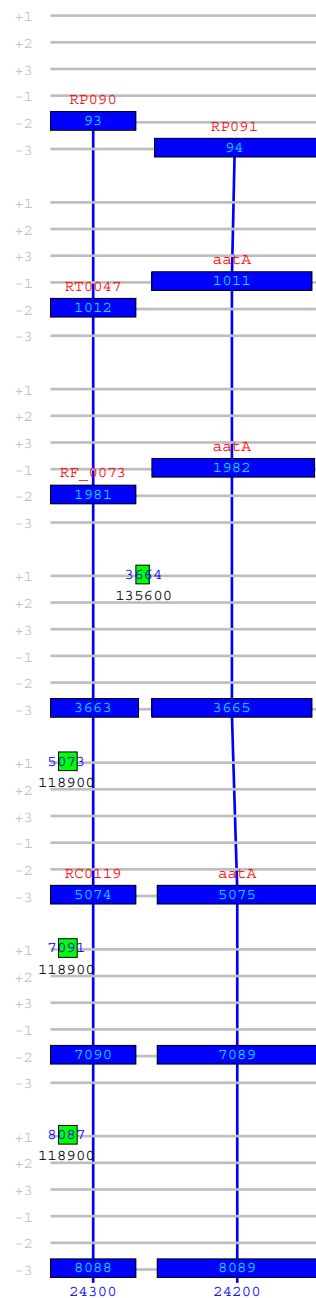

1 Rickettsia prowazekii str. Madrid E, complete genome  
 2 Rickettsia typhi str. wilmington, complete genome  
 3 Rickettsia felis URRWXCal2, complete genome  
 4 Rickettsia akari str. Hartford chromosome, whole genome shotgun sequence  
 5 Rickettsia conorii str. Malish 7, complete genome  
 6 Rickettsia sibirica 246 rsib\_agnrct, whole genome shotgun sequence  
 7 Rickettsia rickettsii chromosome, whole genome shotgun sequence

Reg\_id: 105

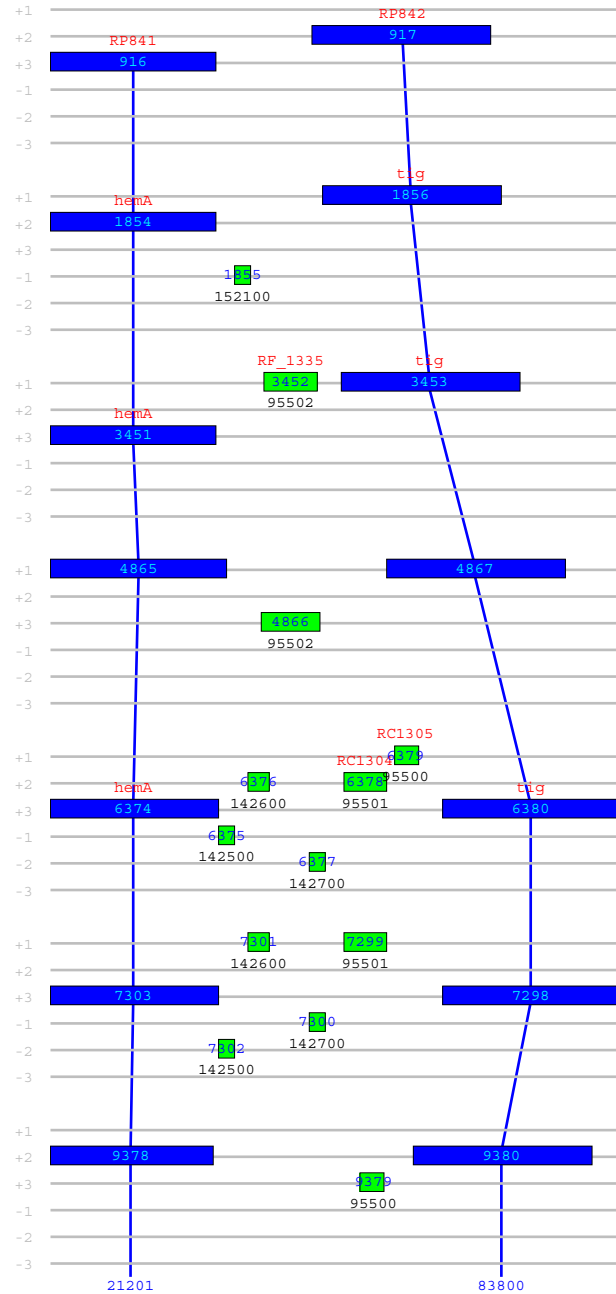

1 Rickettsia prowazekii str. Madrid E, complete genome  
 2 Rickettsia typhi str. wilmington, complete genome  
 3 Rickettsia felis URRWXCal2, complete genome  
 4 Rickettsia akari str. Hartford chromosome, whole genome shotgun sequence  
 5 Rickettsia conorii str. Malish 7, complete genome  
 6 Rickettsia sibirica 246 rsib agncrt, whole genome shotgun sequence  
 7 Rickettsia rickettsii chromosome, whole genome shotgun sequence

Reg\_id: 106

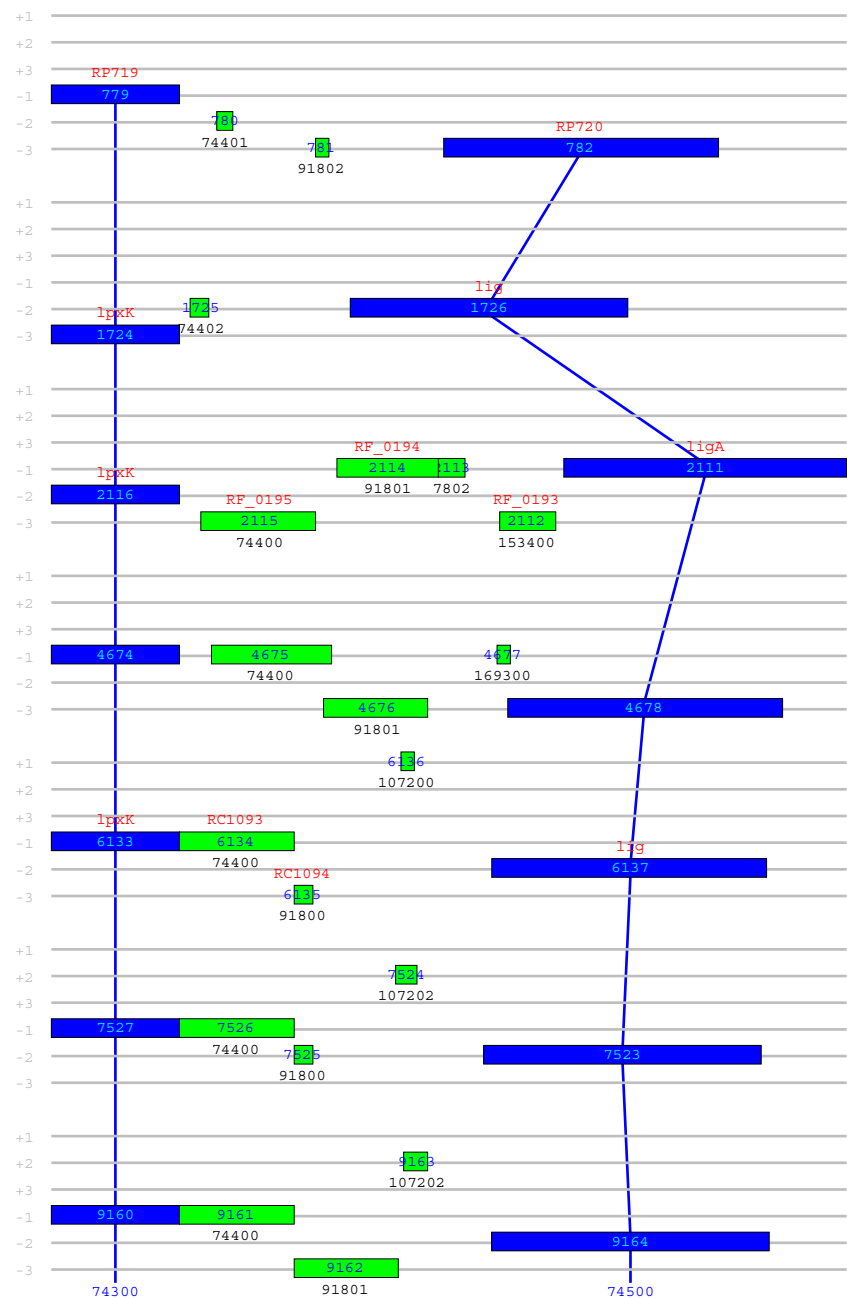

1 Rickettsia prowazekii str. Madrid E, complete genome  
 2 Rickettsia typhi str. wilmington, complete genome  
 3 Rickettsia felis URRWXCal2, complete genome  
 4 Rickettsia akari str. Hartford chromosome, whole genome shotgun sequence  
 5 Rickettsia conorii str. Malish 7, complete genome  
 6 Rickettsia sibirica 246 rsib\_agnrct, whole genome shotgun sequence  
 7 Rickettsia rickettsii chromosome, whole genome shotgun sequence

Reg\_id: 108

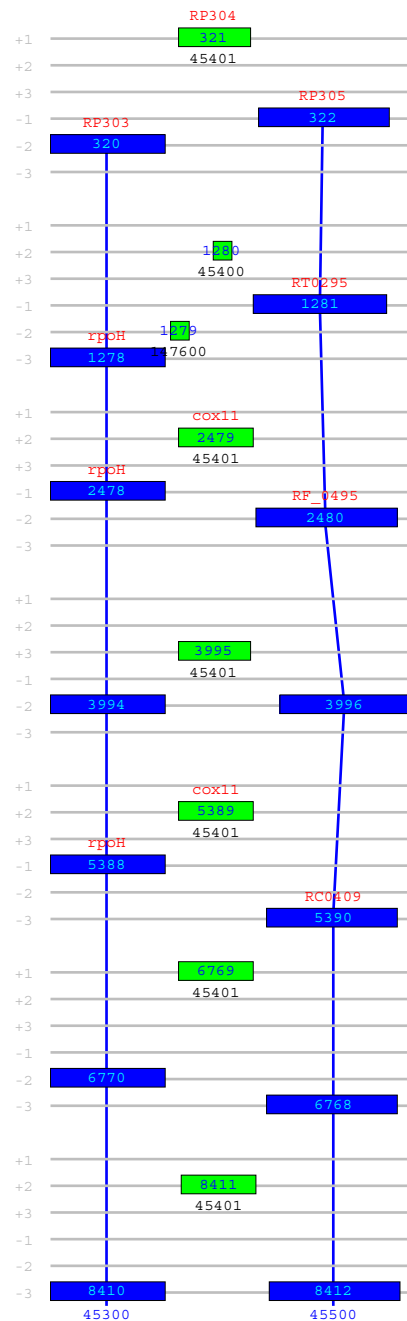

- 1 Rickettsia prowazekii str. Madrid E, complete genome
- 2 Rickettsia typhi str. wilmington, complete genome
- 3 Rickettsia felis URRWXCal2, complete genome
- 4 Rickettsia akari str. Hartford chromosome, whole genome shotgun sequence
- 5 Rickettsia conorii str. Malish 7, complete genome
- 6 Rickettsia sibirica 246 rsib\_agnrcr, whole genome shotgun sequence
- 7 Rickettsia rickettsii chromosome, whole genome shotgun sequence

Reg\_id: 110

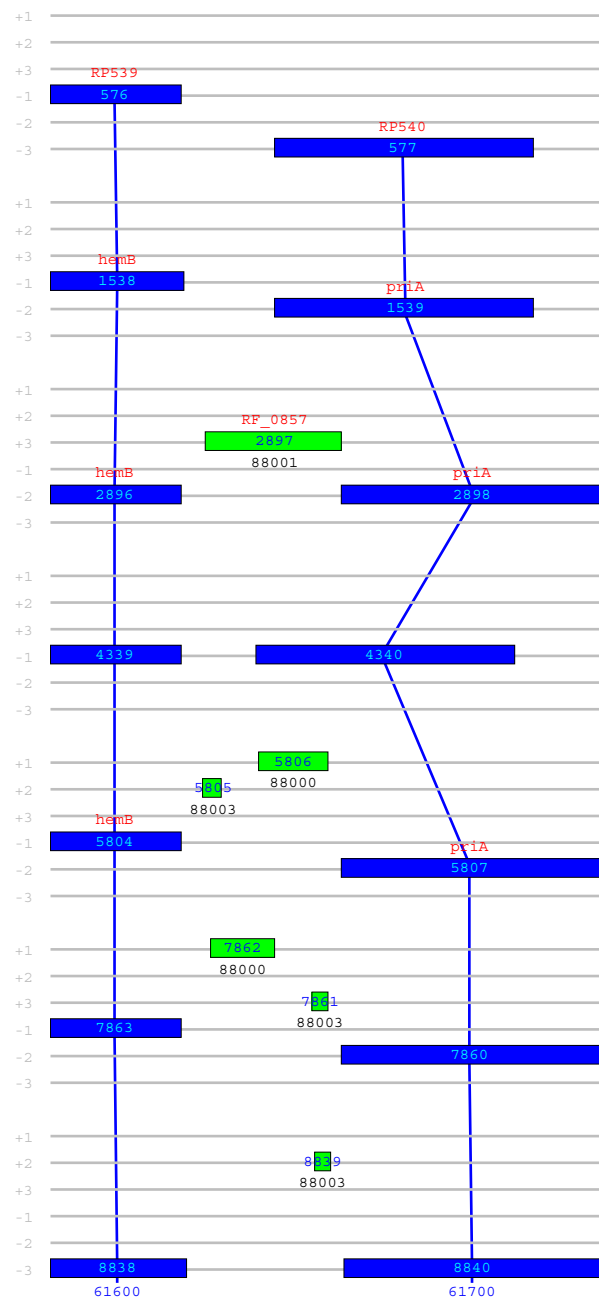

1 Rickettsia prowazekii str. Madrid E, complete genome  
 2 Rickettsia typhi str. wilmington, complete genome  
 3 Rickettsia felis URRWXCal2, complete genome  
 4 Rickettsia akari str. Hartford chromosome, whole genome shotgun sequence  
 5 Rickettsia conorii str. Malish 7, complete genome  
 6 Rickettsia sibirica 246 rsib\_agnrcr, whole genome shotgun sequence  
 7 Rickettsia rickettsii chromosome, whole genome shotgun sequence

Reg\_id: 113

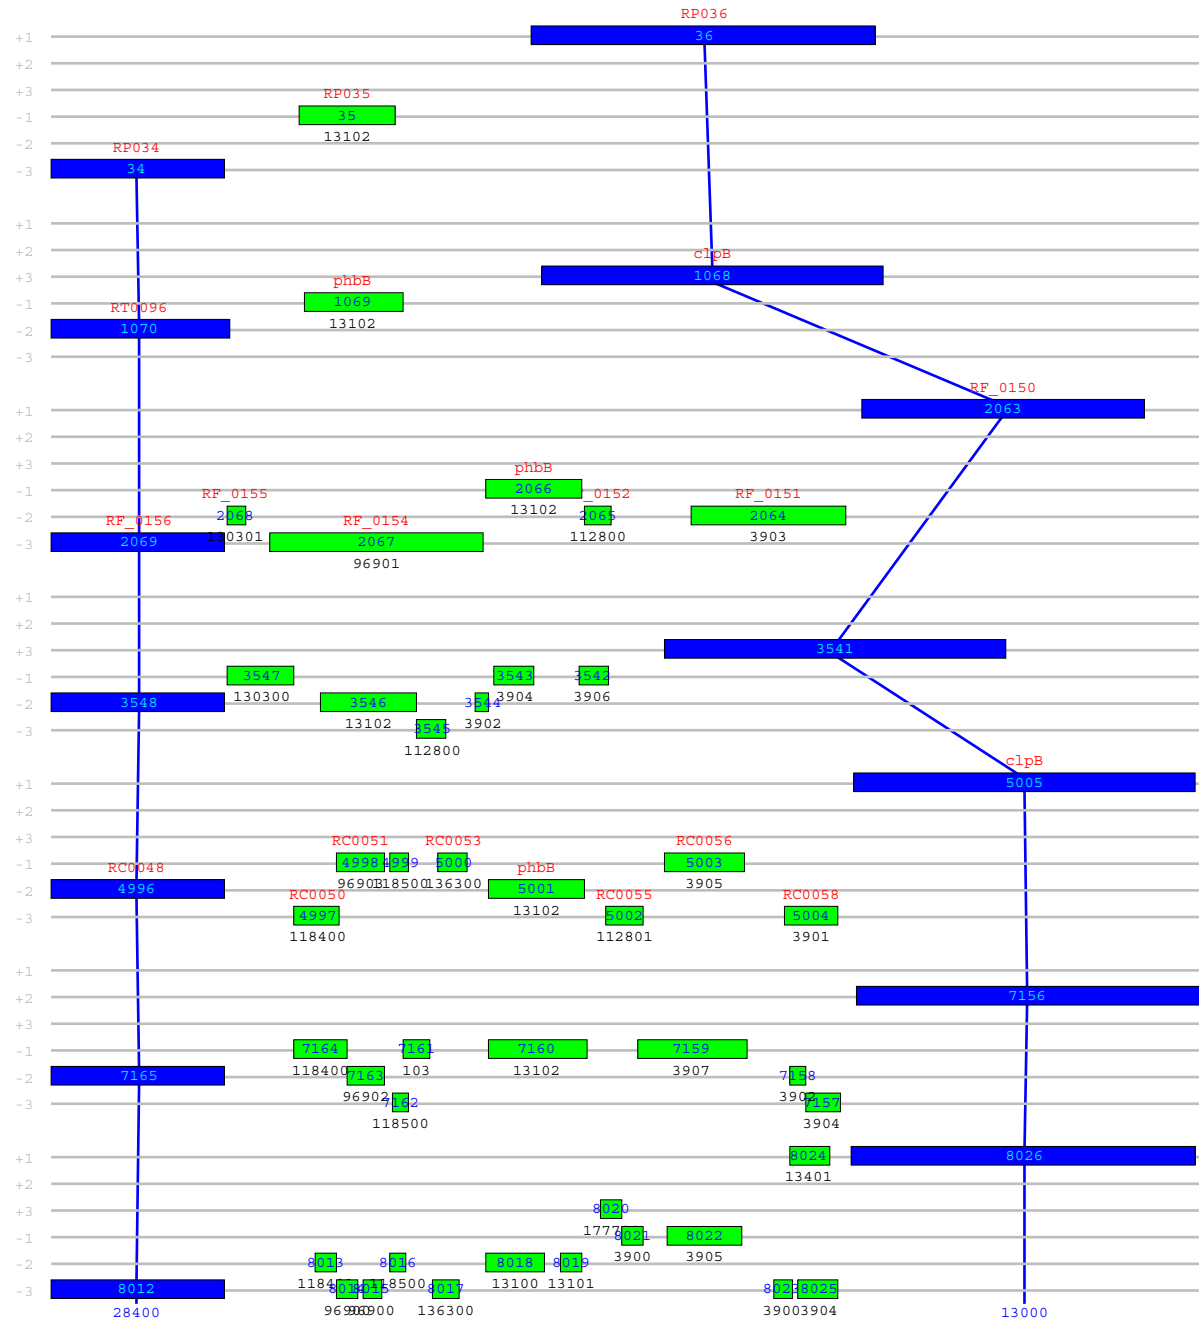

1 Rickettsia prowazekii str. Madrid E, complete genome  
 2 Rickettsia typhi str. wilmington, complete genome  
 3 Rickettsia felis URRWXCal2, complete genome  
 4 Rickettsia akari str. Hartford chromosome, whole genome shotgun sequence  
 5 Rickettsia conorii str. Malish 7, complete genome  
 6 Rickettsia sibirica 246 rsib\_agnrcr, whole genome shotgun sequence  
 7 Rickettsia rickettsii chromosome, whole genome shotgun sequence

Reg\_id: 115

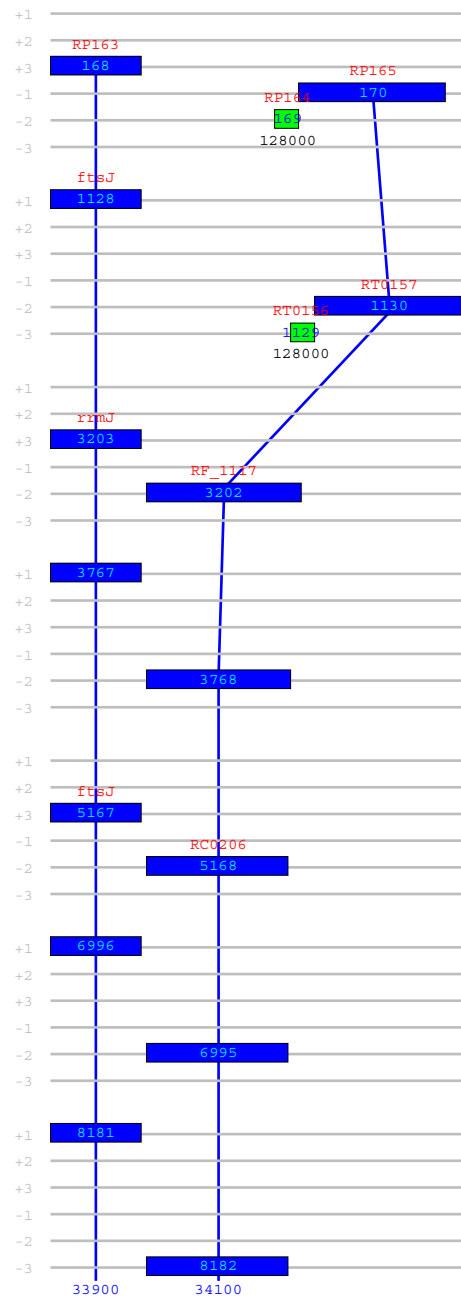



- 1 Rickettsia prowazekii str. Madrid E, complete genome
- 2 Rickettsia typhi str wilmington, complete genome
- 3 Rickettsia felis URRWXCal2, complete genome
- 4 Rickettsia akari str. Hartford chromosome, whole genome shotgun sequence
- 5 Rickettsia conorii str. Malish 7, complete genome
- 6 Rickettsia sibirica 246 rsib\_agnrcr, whole genome shotgun sequence
- 7 Rickettsia rickettsii chromosome, whole genome shotgun sequence

Reg\_id: 116

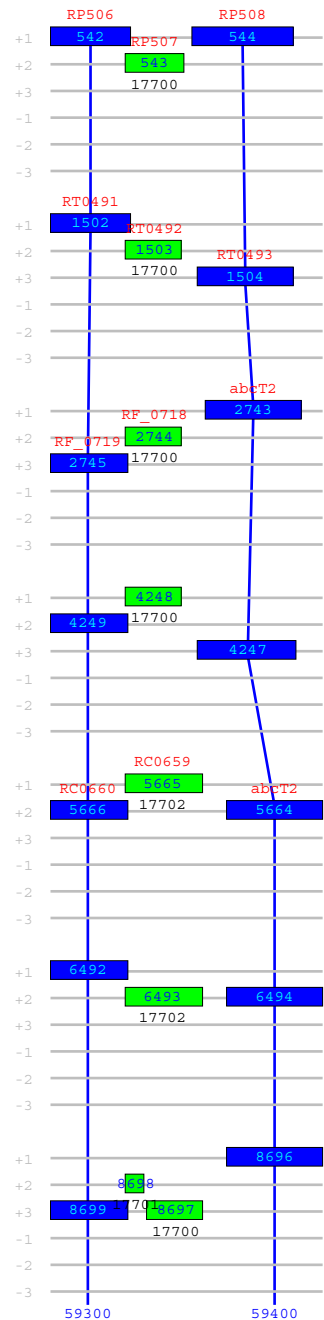

- 1 Rickettsia prowazekii str. Madrid E, complete genome
- 2 Rickettsia typhi str. wilmington, complete genome
- 3 Rickettsia felis URRWXCal2, complete genome
- 4 Rickettsia akari str. Hartford chromosome, whole genome shotgun sequence
- 5 Rickettsia conorii str. Malish 7, complete genome
- 6 Rickettsia sibirica 246 rsib\_agnrct, whole genome shotgun sequence
- 7 Rickettsia rickettsii chromosome, whole genome shotgun sequence

Reg\_id: 118

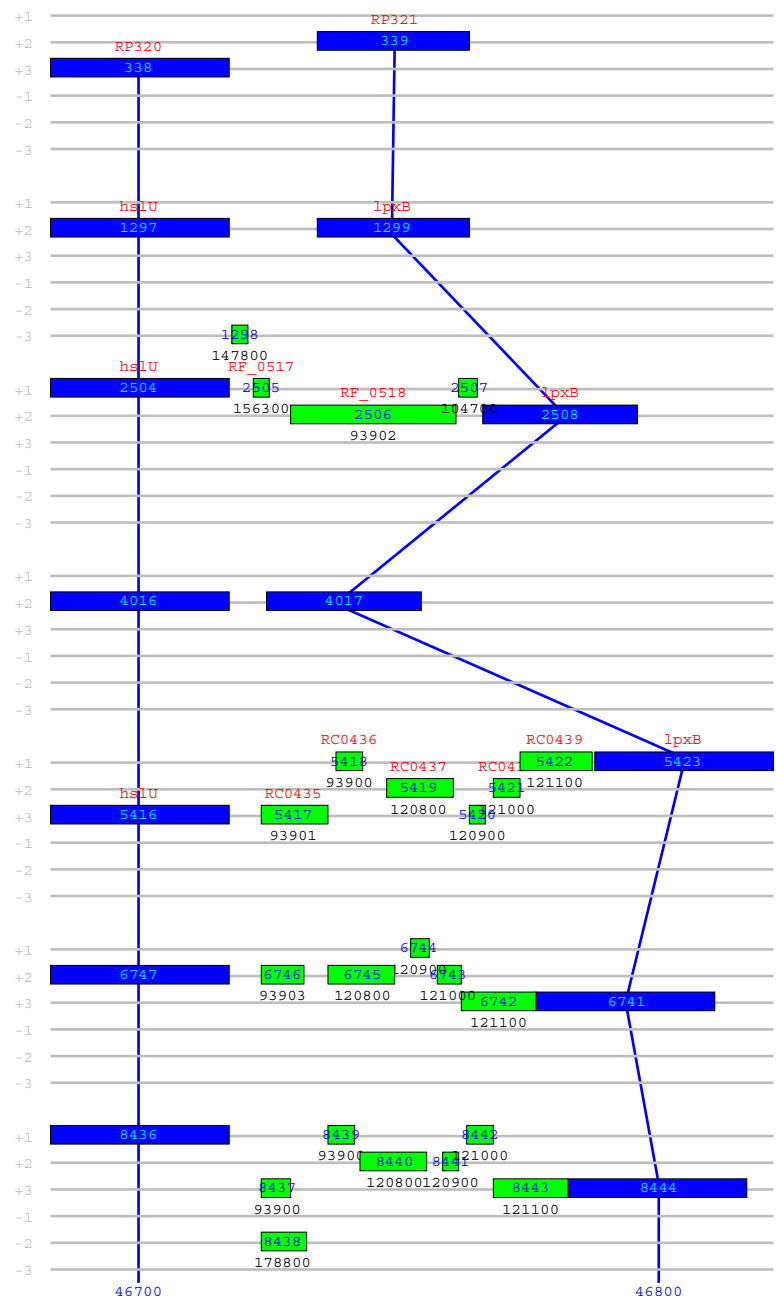

- 1 Rickettsia prowazekii str. Madrid E, complete genome
- 2 Rickettsia typhi str. wilmington, complete genome
- 3 Rickettsia felis URRWXCal2, complete genome
- 4 Rickettsia akari str. Hartford chromosome, whole genome shotgun sequence
- 5 Rickettsia conorii str. Malish 7, complete genome
- 6 Rickettsia sibirica 246 rsib\_agnrcr, whole genome shotgun sequence
- 7 Rickettsia rickettsii chromosome, whole genome shotgun sequence

Reg\_id: 119

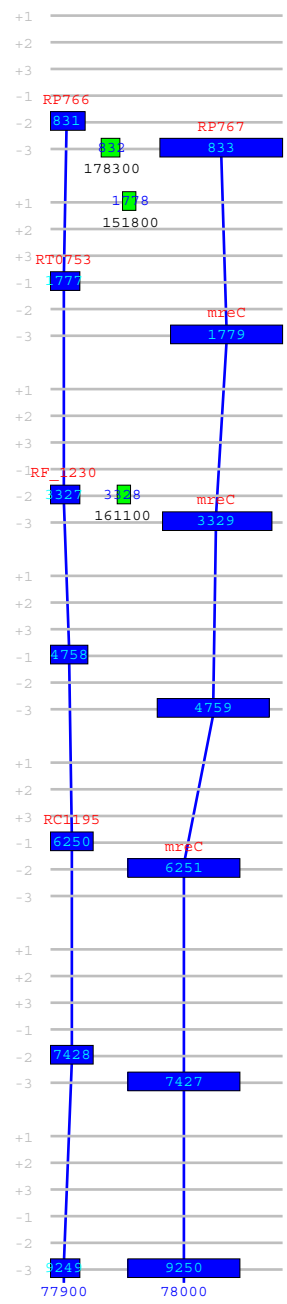

1 Rickettsia prowazekii str. Madrid E, complete genome  
 2 Rickettsia typhi str wilmington, complete genome  
 3 Rickettsia felis URRWXCal2, complete genome  
 4 Rickettsia akari str. Hartford chromosome, whole genome shotgun sequence  
 5 Rickettsia conorii str. Malish 7, complete genome  
 6 Rickettsia sibirica 246 rsib\_agnrcr, whole genome shotgun sequence  
 7 Rickettsia rickettsii chromosome, whole genome shotgun sequence

Reg\_id: 125

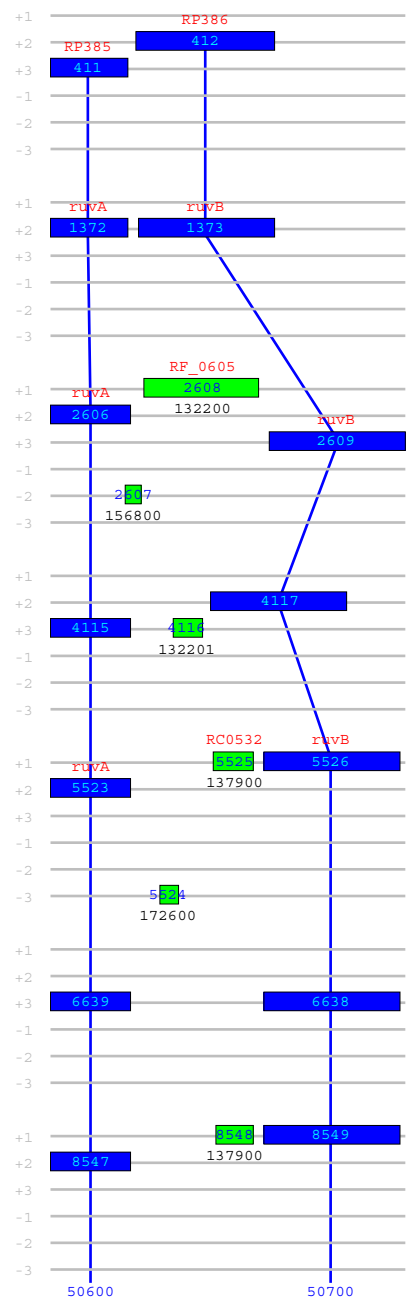

1 Rickettsia prowazekii str. Madrid E, complete genome  
 2 Rickettsia typhi str. wilmington, complete genome  
 3 Rickettsia felis URRWXCal2, complete genome  
 4 Rickettsia akari str. Hartford chromosome, whole genome shotgun sequence  
 5 Rickettsia conorii str. Malish 7, complete genome  
 6 Rickettsia sibirica 246 rsib\_agnrcr, whole genome shotgun sequence  
 7 Rickettsia rickettsii chromosome, whole genome shotgun sequence

Reg\_id: 126

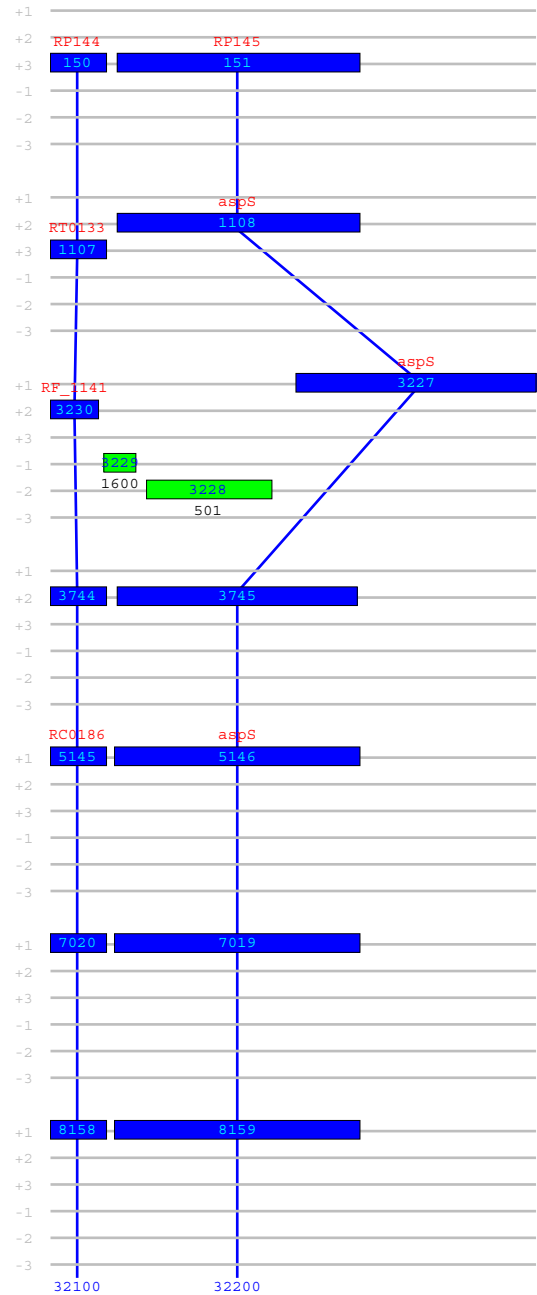

- 1 Rickettsia prowazekii str. Madrid E, complete genome
- 2 Rickettsia typhi str. wilmington, complete genome
- 3 Rickettsia felis URRWXCa2, complete genome
- 4 Rickettsia akari str. Hartford chromosome, whole genome shotgun sequence
- 5 Rickettsia conorii str. Malish 7, complete genome
- 6 Rickettsia sibirica 246 rsib\_agnrct, whole genome shotgun sequence
- 7 Rickettsia rickettsii chromosome, whole genome shotgun sequence

Reg\_id: 127

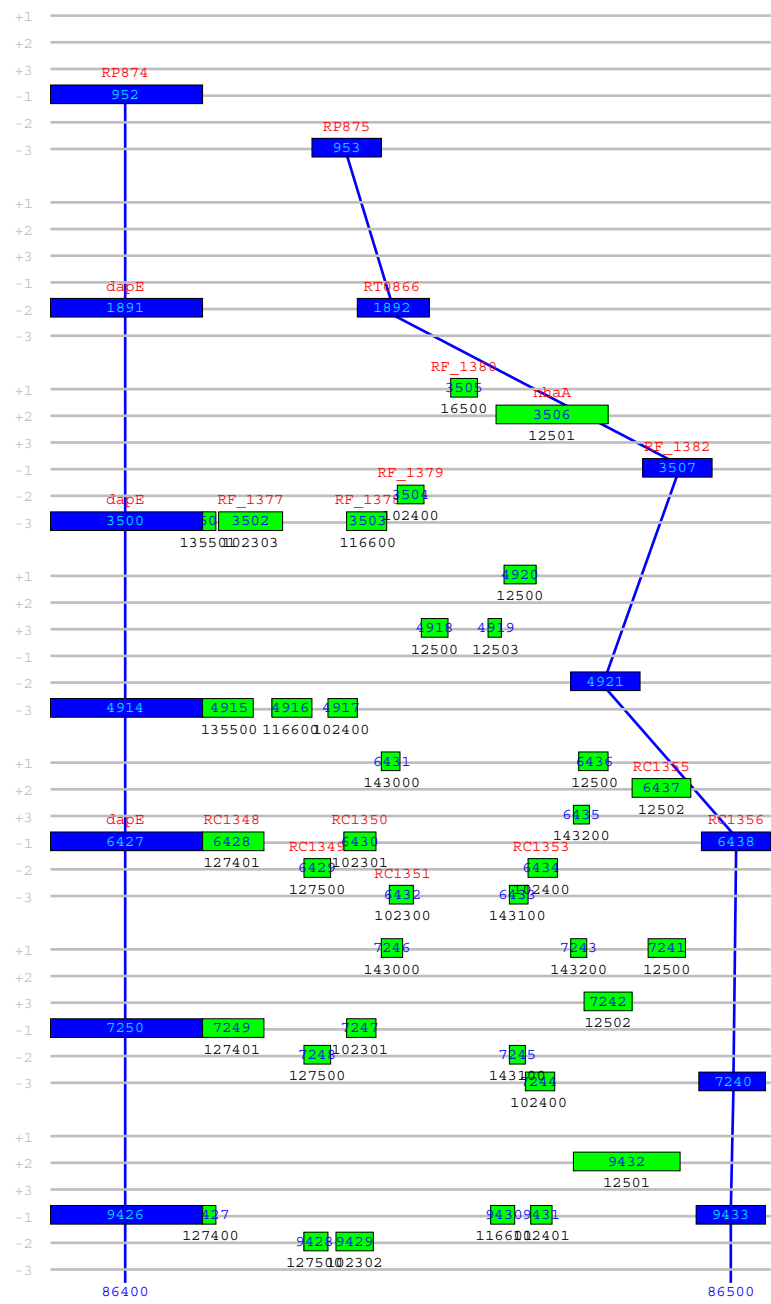

1 Rickettsia prowazekii str. Madrid E, complete genome  
 2 Rickettsia typhi str. wilmington, complete genome  
 3 Rickettsia felis URRWXCa12, complete genome  
 4 Rickettsia akari str. Hartford chromosome, whole genome shotgun sequence  
 5 Rickettsia conorii str. Malish 7, complete genome  
 6 Rickettsia sibirica 246 rsib\_agnrt, whole genome shotgun sequence  
 7 Rickettsia rickettsii chromosome, whole genome shotgun sequence

Reg\_id: 128

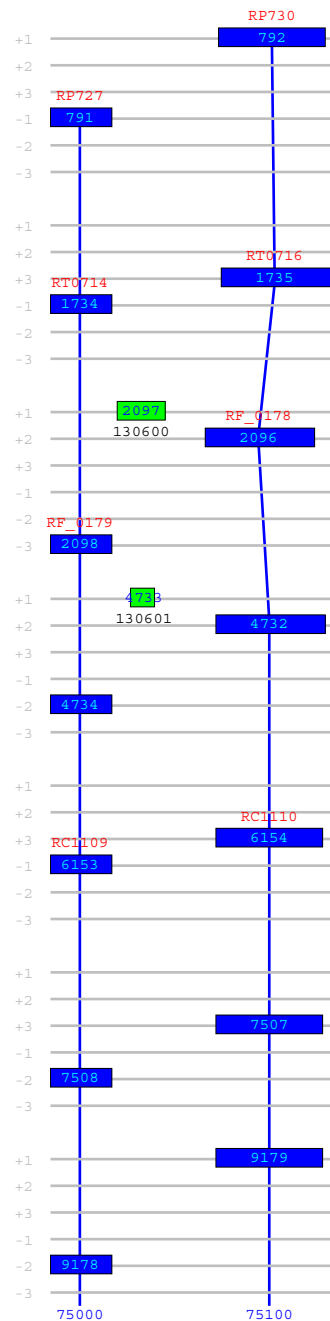

1 Rickettsia prowazekii str. Madrid E, complete genome  
 2 Rickettsia typhi str. wilmington, complete genome  
 3 Rickettsia felis URRWXCal2, complete genome  
 4 Rickettsia akari str. Hartford chromosome, whole genome shotgun sequence  
 5 Rickettsia conorii str. Malish 7, complete genome  
 6 Rickettsia sibirica 246 rsib\_agnrct, whole genome shotgun sequence  
 7 Rickettsia rickettsii chromosome, whole genome shotgun sequence

Reg\_id: 129

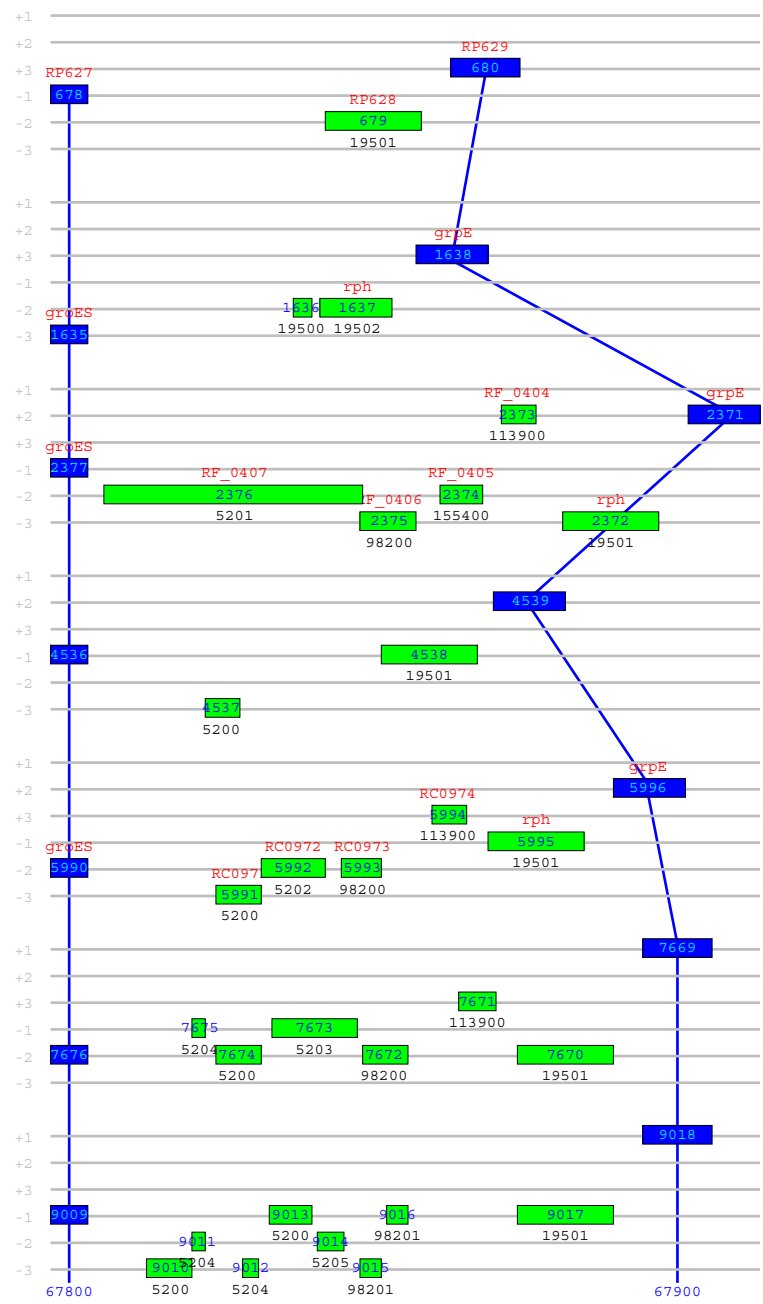



- 1 Rickettsia prowazekii str. Madrid E, complete genome
- 2 Rickettsia typhi str. wilmington, complete genome
- 3 Rickettsia felis URRWXCal2, complete genome
- 4 Rickettsia akari str. Hartford chromosome, whole genome shotgun sequence
- 5 Rickettsia conorii str. Malish 7, complete genome
- 6 Rickettsia sibirica 246 rsib agncrt, whole genome shotgun sequence
- 7 Rickettsia rickettsii chromosome, whole genome shotgun sequence

Reg\_id: 130

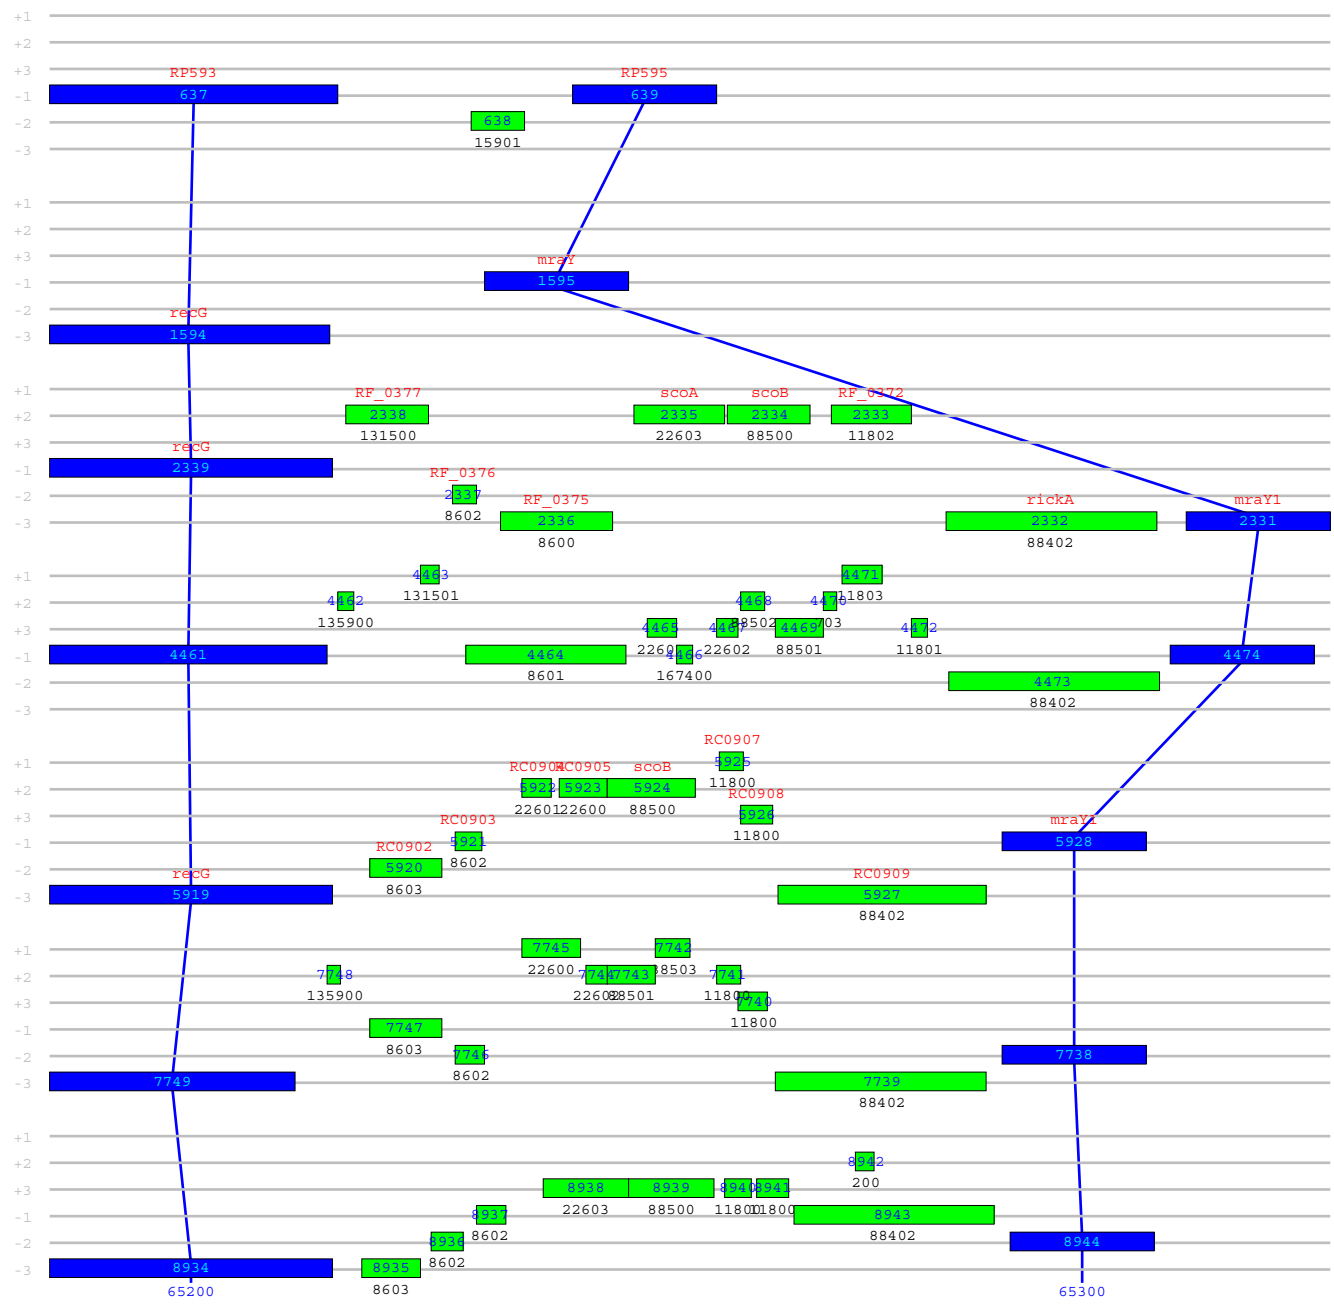

- 1 Rickettsia prowazekii str. Madrid E, complete genome
- 2 Rickettsia typhi str. wilmington, complete genome
- 3 Rickettsia felis URRWXCal2, complete genome
- 4 Rickettsia akari str. Hartford chromosome, whole genome shotgun sequence
- 5 Rickettsia conorii str. Malish 7, complete genome
- 6 Rickettsia sibirica 246 rsib\_agnrcr, whole genome shotgun sequence
- 7 Rickettsia rickettsii chromosome, whole genome shotgun sequence

Reg\_id: 131

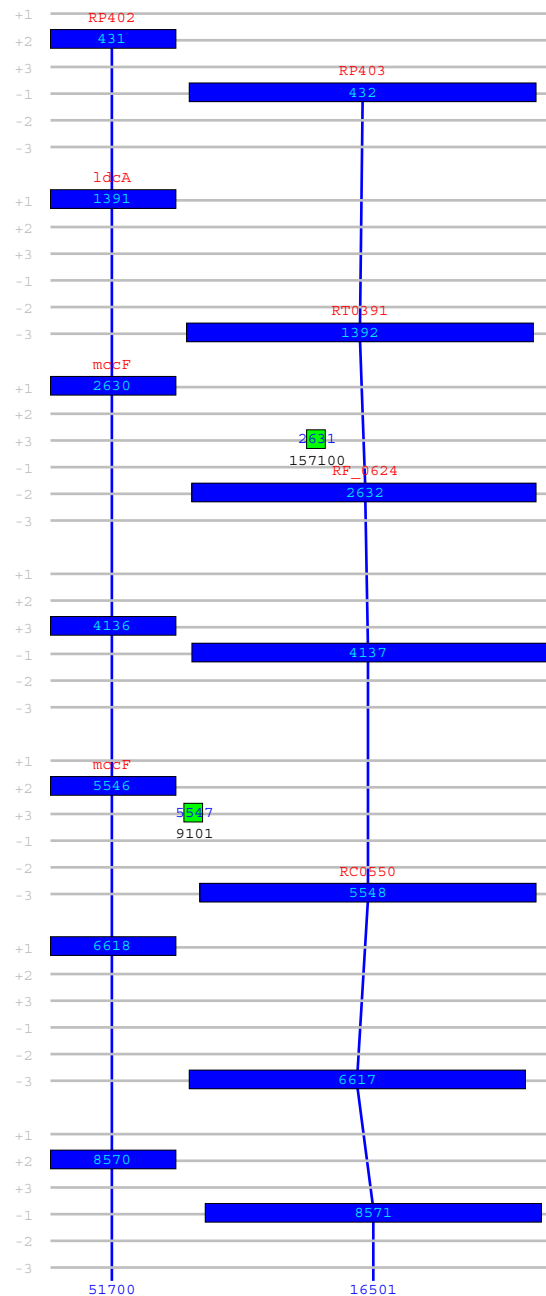

1 Rickettsia prowazekii str. Madrid E, complete genome  
 2 Rickettsia typhi str. wilmington, complete genome  
 3 Rickettsia felis URWXC2, complete genome  
 4 Rickettsia akari str. Hartford chromosome, whole genome shotgun sequence  
 5 Rickettsia conorii str. Malish 7, complete genome  
 6 Rickettsia sibirica 246 rsib agncrt, whole genome shotgun sequence  
 7 Rickettsia rickettsii chromosome, whole genome shotgun sequence

Reg\_id: 134

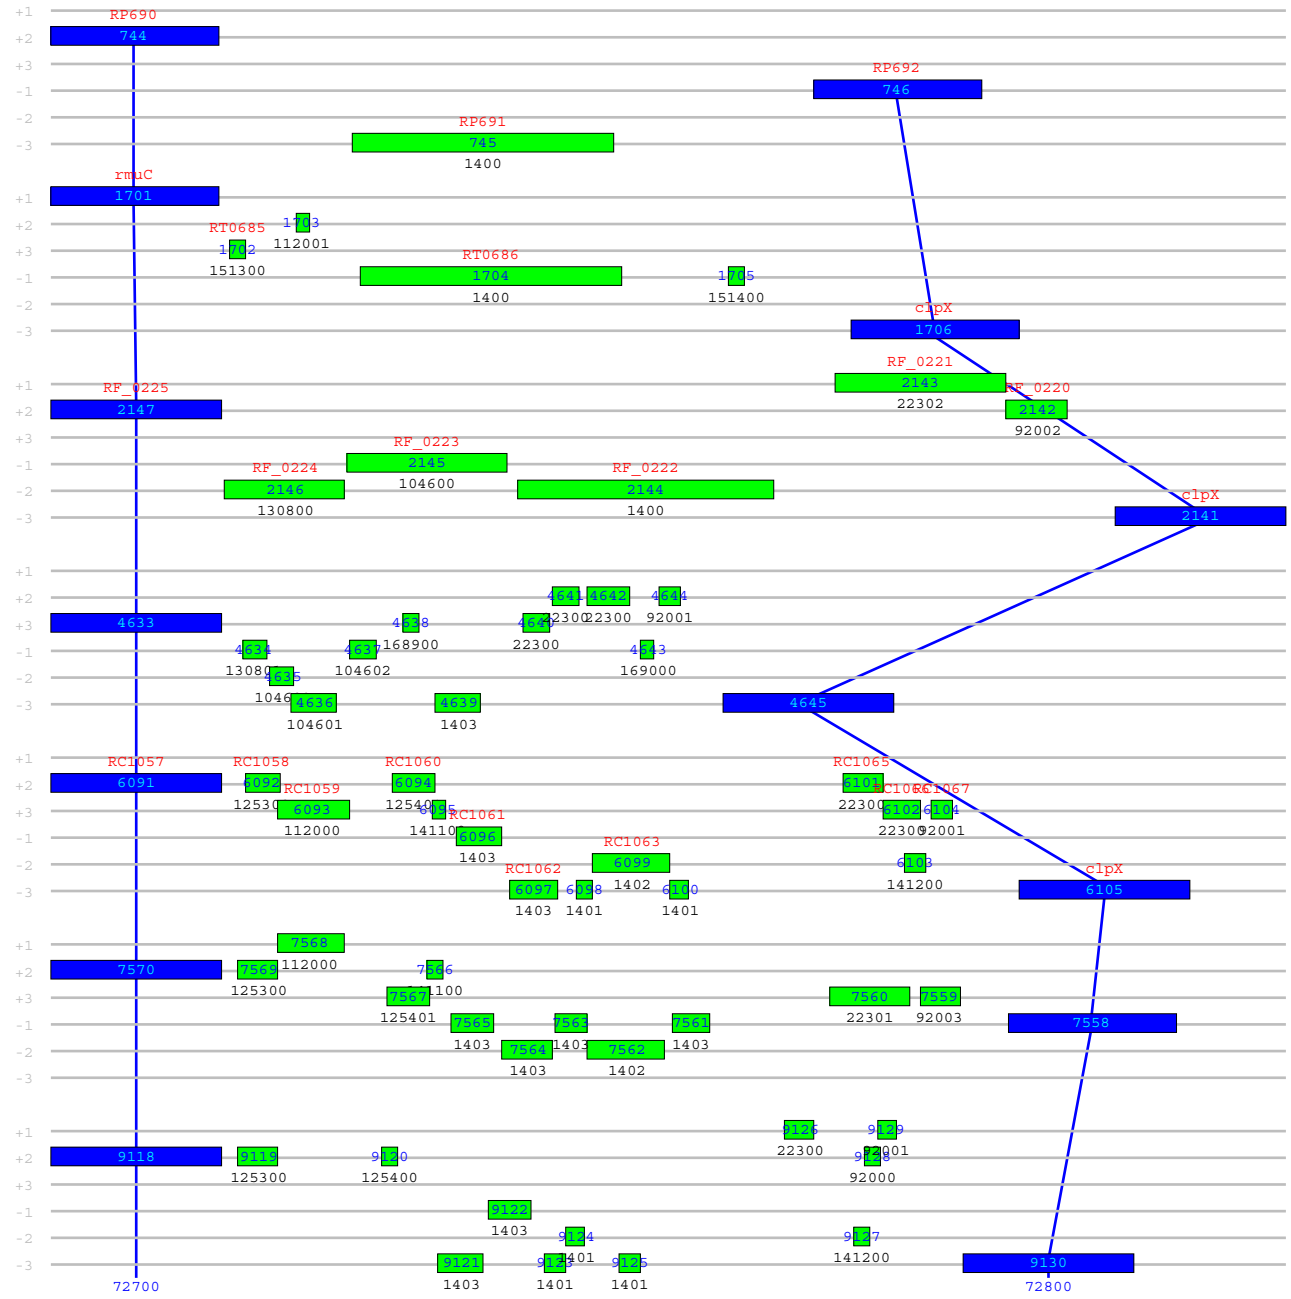

1 Rickettsia prowazekii str. Madrid E, complete genome  
 2 Rickettsia typhi str. wilmington, complete genome  
 3 Rickettsia felis URRWXCa12, complete genome  
 4 Rickettsia akari str. Hartford chromosome, whole genome shotgun sequence  
 5 Rickettsia conorii str. Malish 7, complete genome  
 6 Rickettsia sibirica 246 rsib\_agnrcr, whole genome shotgun sequence  
 7 Rickettsia rickettsii chromosome, whole genome shotgun sequence

Reg\_id: 136

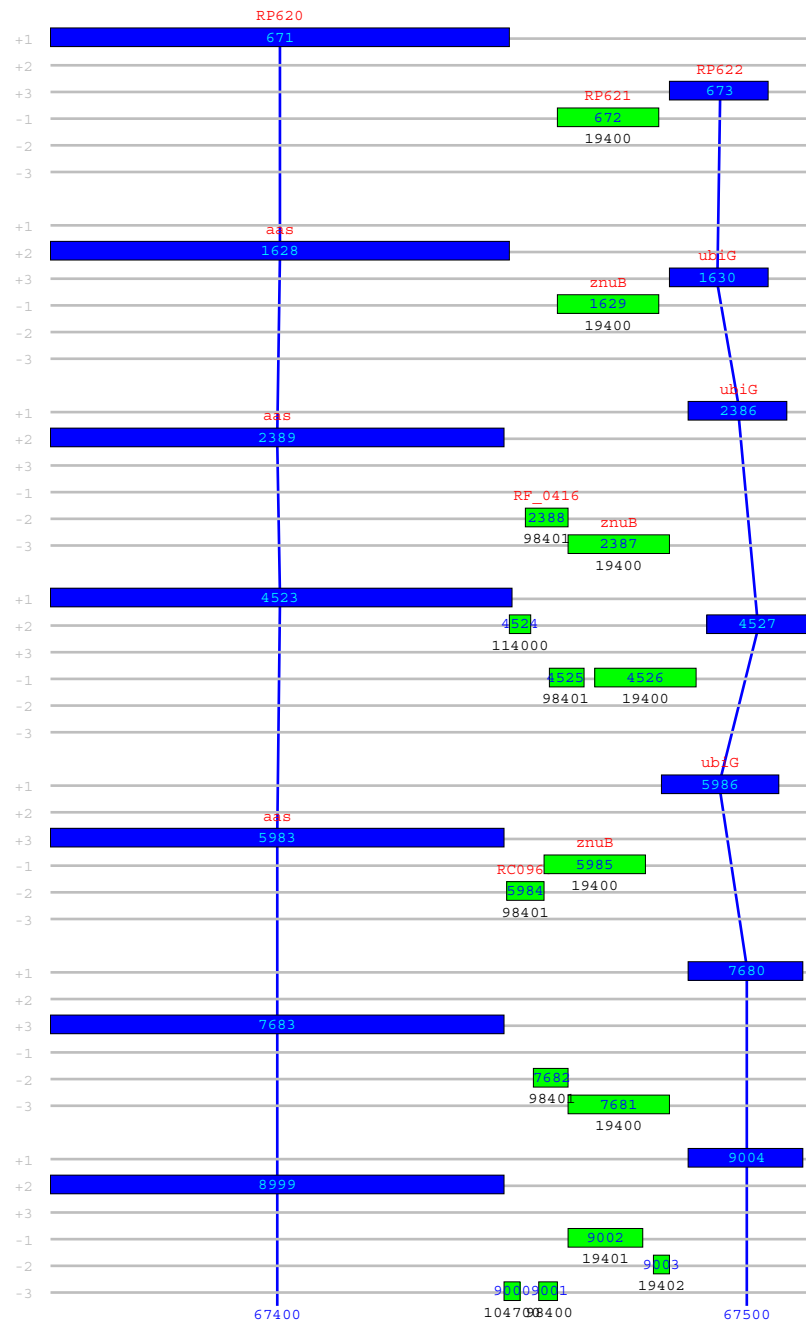

1 Rickettsia prowazekii str. Madrid E, complete genome  
 2 Rickettsia typhi str. wilmington, complete genome  
 3 Rickettsia felis URRWXCal2, complete genome  
 4 Rickettsia akari str. Hartford chromosome, whole genome shotgun sequence  
 5 Rickettsia conorii str. Malish 7, complete genome  
 6 Rickettsia sibirica 246 rsib\_agnrcr, whole genome shotgun sequence  
 7 Rickettsia rickettsii chromosome, whole genome shotgun sequence

Reg\_id: 137

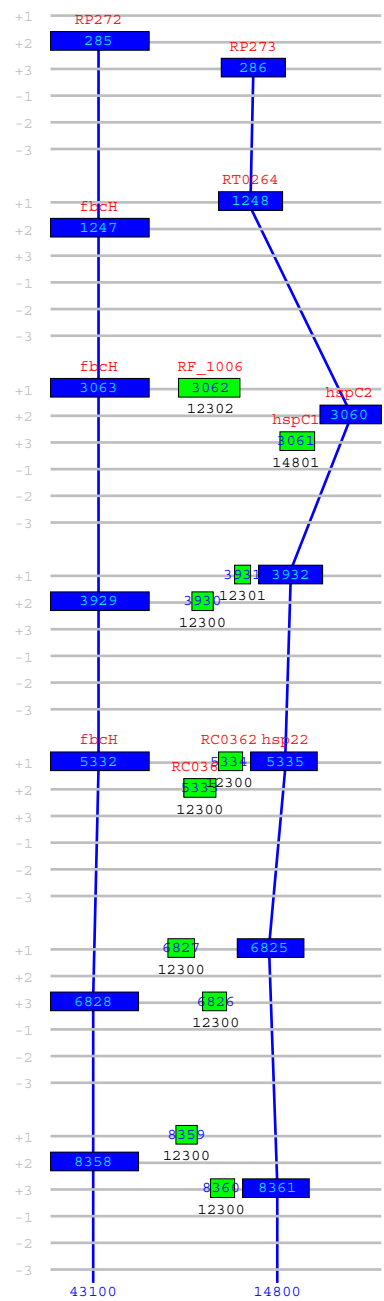

1 Rickettsia prowazekii str. Madrid E, complete genome  
 2 Rickettsia typhi str. wilmington, complete genome  
 3 Rickettsia felis URRWXCal2, complete genome  
 4 Rickettsia akari str. Hartford chromosome, whole genome shotgun sequence  
 5 Rickettsia conorii str. Malish 7, complete genome  
 6 Rickettsia sibirica 246 rsib\_agnrct, whole genome shotgun sequence  
 7 Rickettsia rickettsii chromosome, whole genome shotgun sequence

Reg\_id: 138

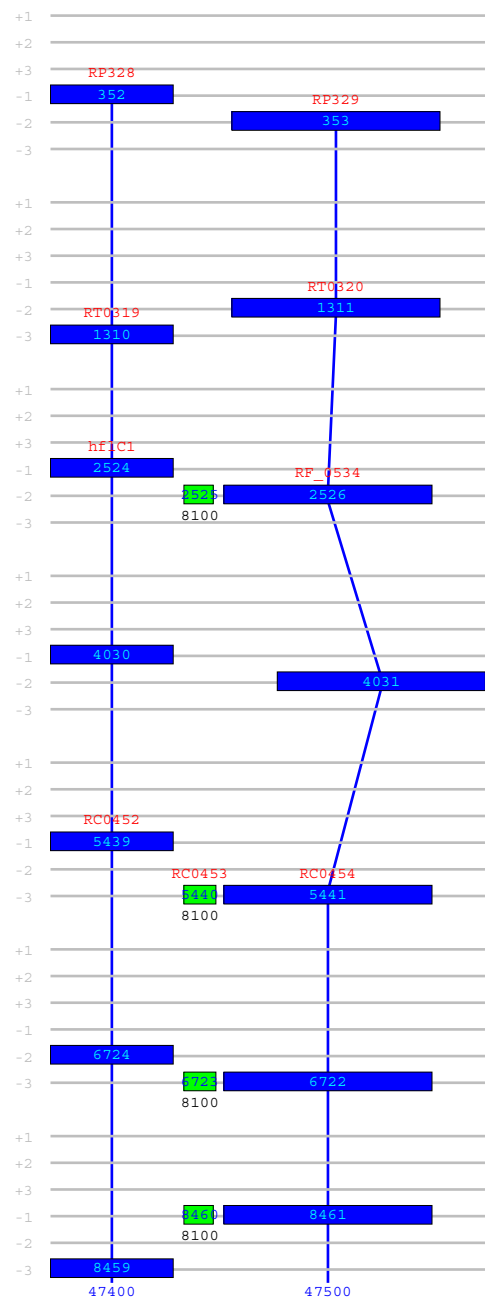

1 Rickettsia prowazekii str. Madrid E, complete genome  
 2 Rickettsia typhi str. wilmington, complete genome  
 3 Rickettsia felis URRWXCal2, complete genome  
 4 Rickettsia akari str. Hartford chromosome, whole genome shotgun sequence  
 5 Rickettsia conorii str. Malish 7, complete genome  
 6 Rickettsia sibirica 246 rsib\_agnrcr, whole genome shotgun sequence  
 7 Rickettsia rickettsii chromosome, whole genome shotgun sequence

Reg\_id: 139

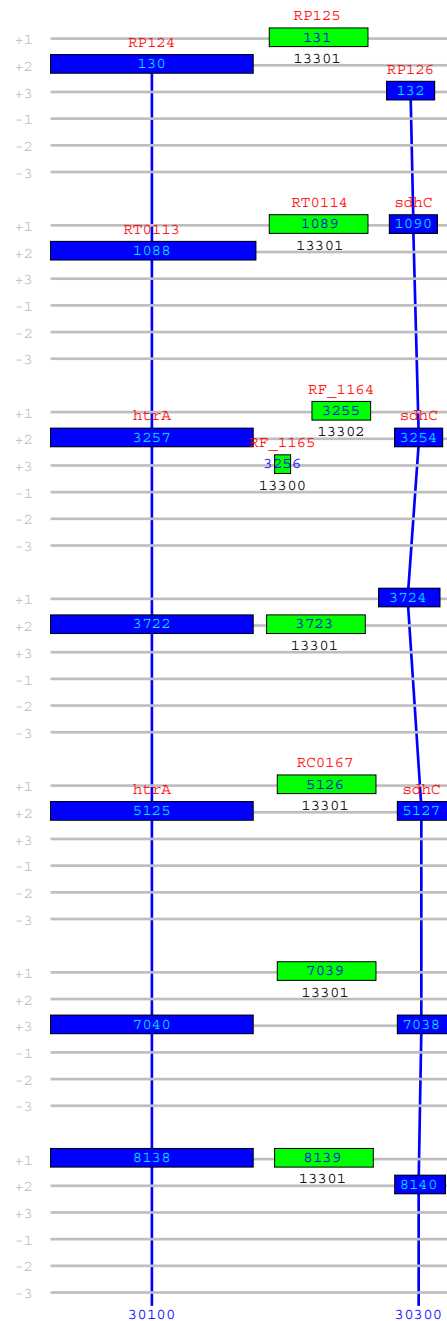

1 Rickettsia prowazekii str. Madrid E, complete genome  
 2 Rickettsia typhi str. wilmington, complete genome  
 3 Rickettsia felis URRWXCal2, complete genome  
 4 Rickettsia akari str. Hartford chromosome, whole genome shotgun sequence  
 5 Rickettsia conorii str. Malish 7, complete genome  
 6 Rickettsia sibirica 246 rsib\_agnrct, whole genome shotgun sequence  
 7 Rickettsia rickettsii chromosome, whole genome shotgun sequence

Reg\_id: 143

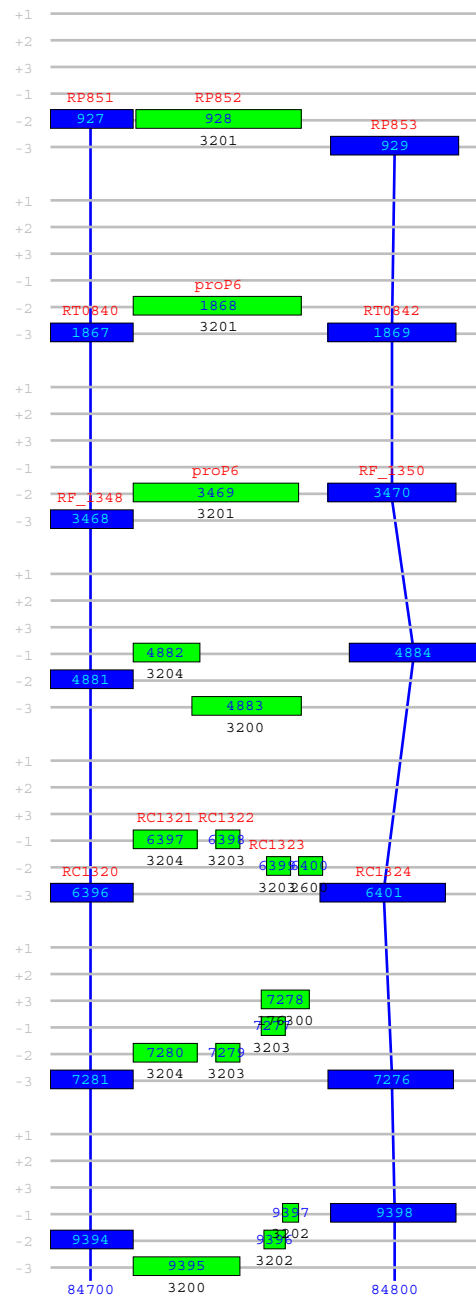



1 Rickettsia prowazekii str. Madrid E, complete genome  
 2 Rickettsia typhi str. wilmington, complete genome  
 3 Rickettsia felis URRWXCal2, complete genome  
 4 Rickettsia akari str. Hartford chromosome, whole genome shotgun sequence  
 5 Rickettsia conorii str. Malish 7, complete genome  
 6 Rickettsia sibirica 246 rsib\_agnrct, whole genome shotgun sequence  
 7 Rickettsia rickettsii chromosome, whole genome shotgun sequence

Reg\_id: 144

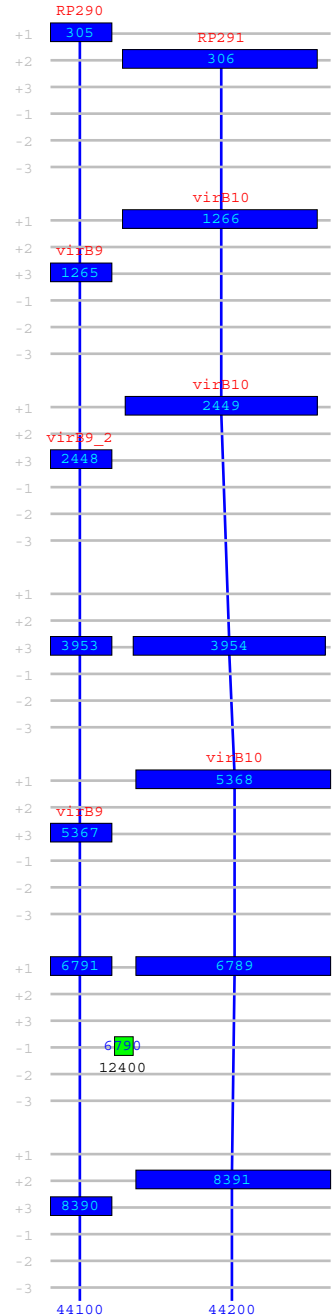

1 Rickettsia prowazekii str. Madrid E, complete genome  
 2 Rickettsia typhi str. wilmington, complete genome  
 3 Rickettsia felis URRWXCal2, complete genome  
 4 Rickettsia akari str. Hartford chromosome, whole genome shotgun sequence  
 5 Rickettsia conorii str. Malish 7, complete genome  
 6 Rickettsia sibirica 246 rsib\_agnrct, whole genome shotgun sequence  
 7 Rickettsia rickettsii chromosome, whole genome shotgun sequence

Reg\_id: 149

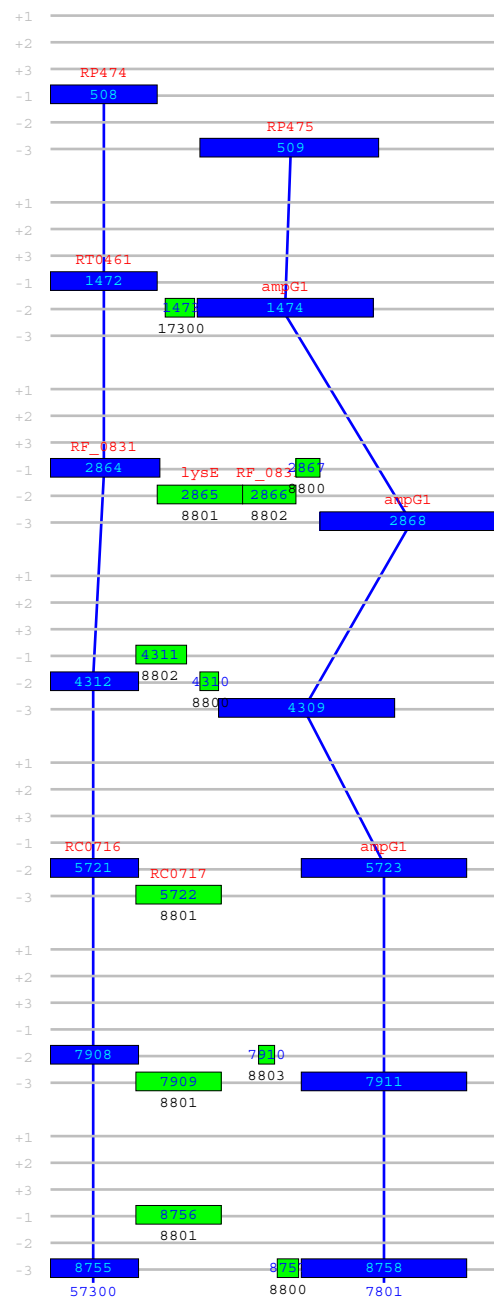

1 Rickettsia prowazekii str. Madrid E, complete genome  
2 Rickettsia typhi str. wilmington, complete genome  
3 Rickettsia felis URRWXCal2, complete genome  
4 Rickettsia akari str. Hartford chromosome, whole genome shotgun sequence  
5 Rickettsia conorii str. Malish 7, complete genome  
6 Rickettsia sibirica 246 rsib\_agnrcr, whole genome shotgun sequence  
7 Rickettsia rickettsii chromosome, whole genome shotgun sequence

Reg\_id: 151

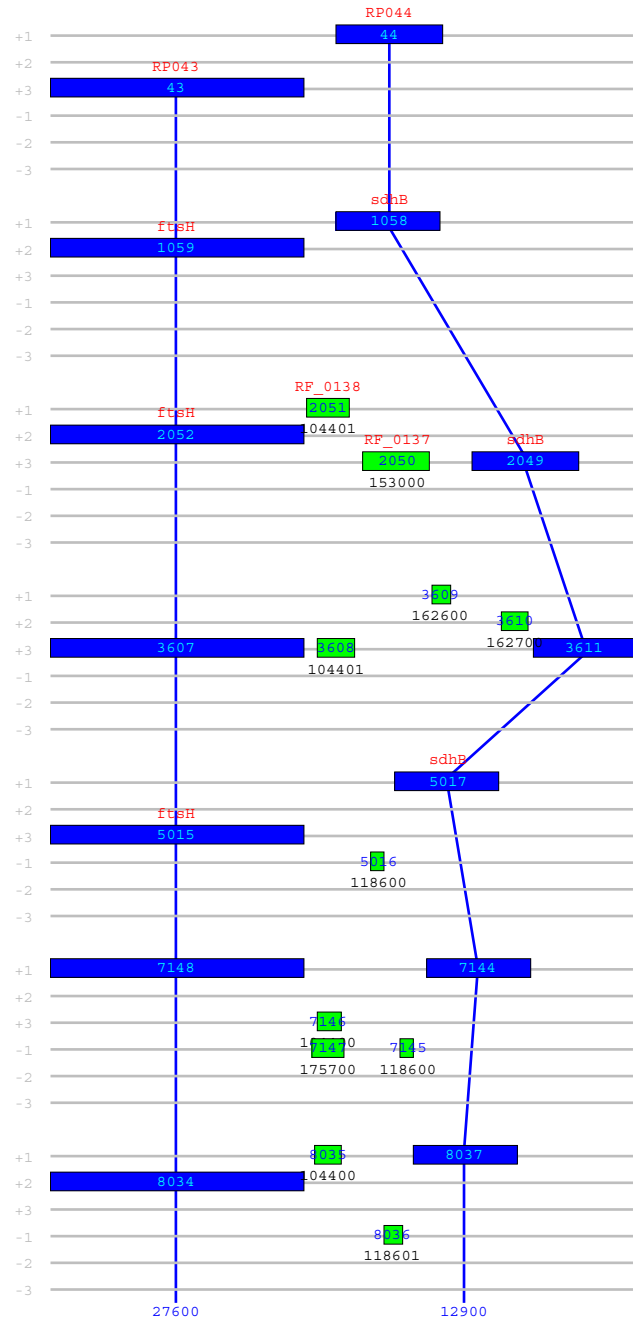

- 1 Rickettsia prowazekii str. Madrid E, complete genome
- 2 Rickettsia typhi str. Wilmington, complete genome
- 3 Rickettsia felis URRWXC2, complete genome
- 4 Rickettsia akari str. Hartford chromosome, whole genome shotgun sequence
- 5 Rickettsia conorii str. Malish 7, complete genome
- 6 Rickettsia sibirica 246 rsib agncrt, whole genome shotgun sequence
- 7 Rickettsia rickettsii chromosome, whole genome shotgun sequence

Reg\_id: 152

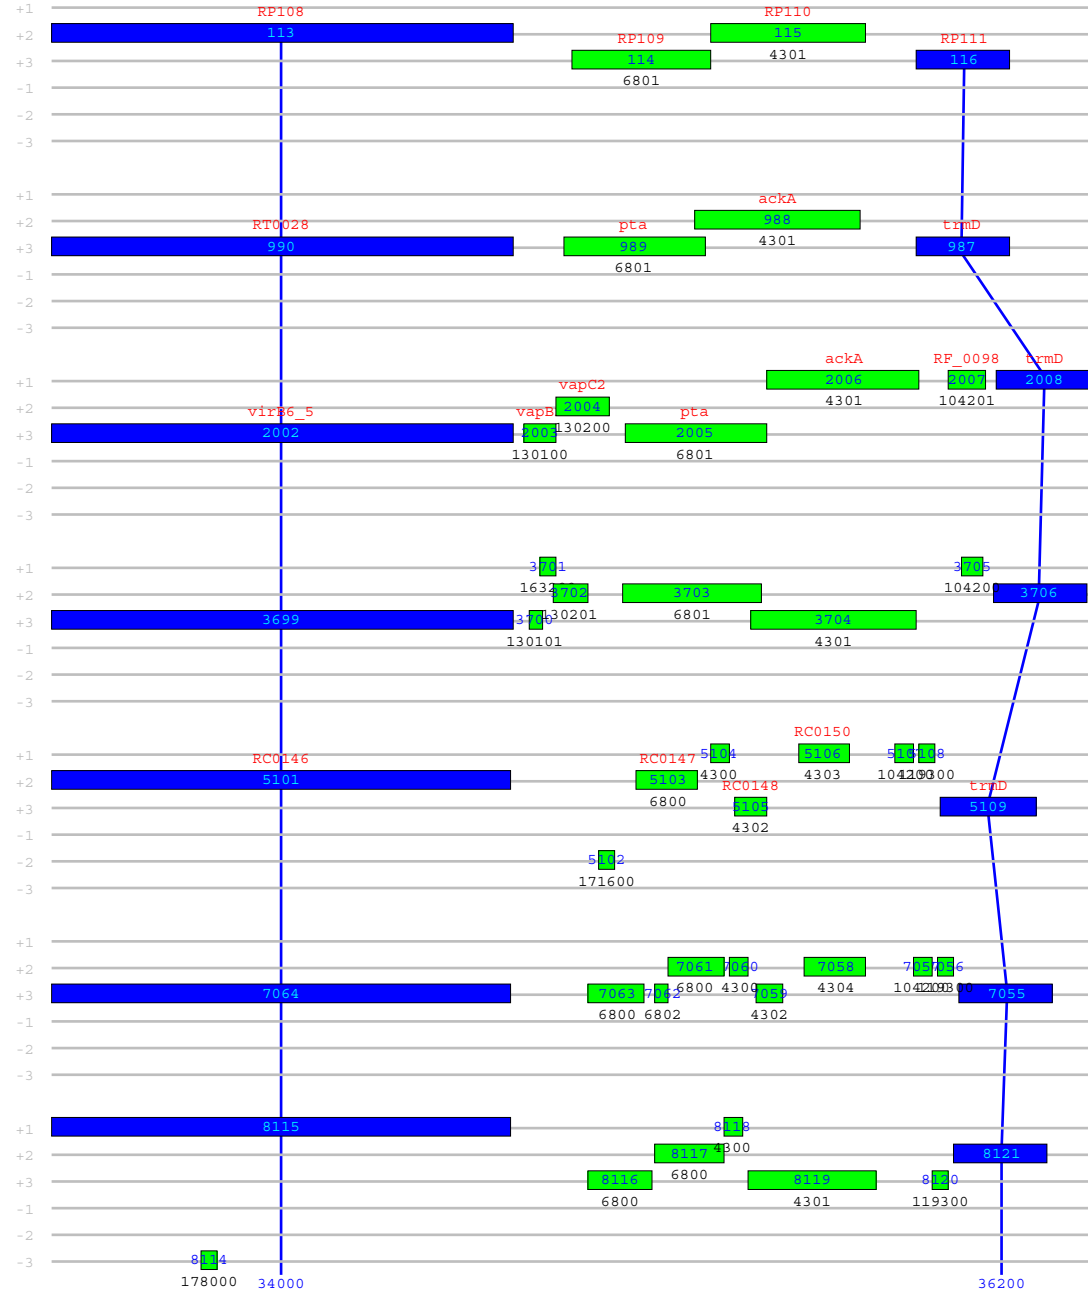

- 1 Rickettsia prowazekii str. Madrid E, complete genome
- 2 Rickettsia typhi str. wilmington, complete genome
- 3 Rickettsia felis URRWXcal2, complete genome
- 4 Rickettsia akari str. Hartford chromosome, whole genome shotgun sequence
- 5 Rickettsia conorii str. Malish 7, complete genome
- 6 Rickettsia sibirica 246 rsib\_agnrt, whole genome shotgun sequence
- 7 Rickettsia rickettsii chromosome, whole genome shotgun sequence

Reg\_id: 156

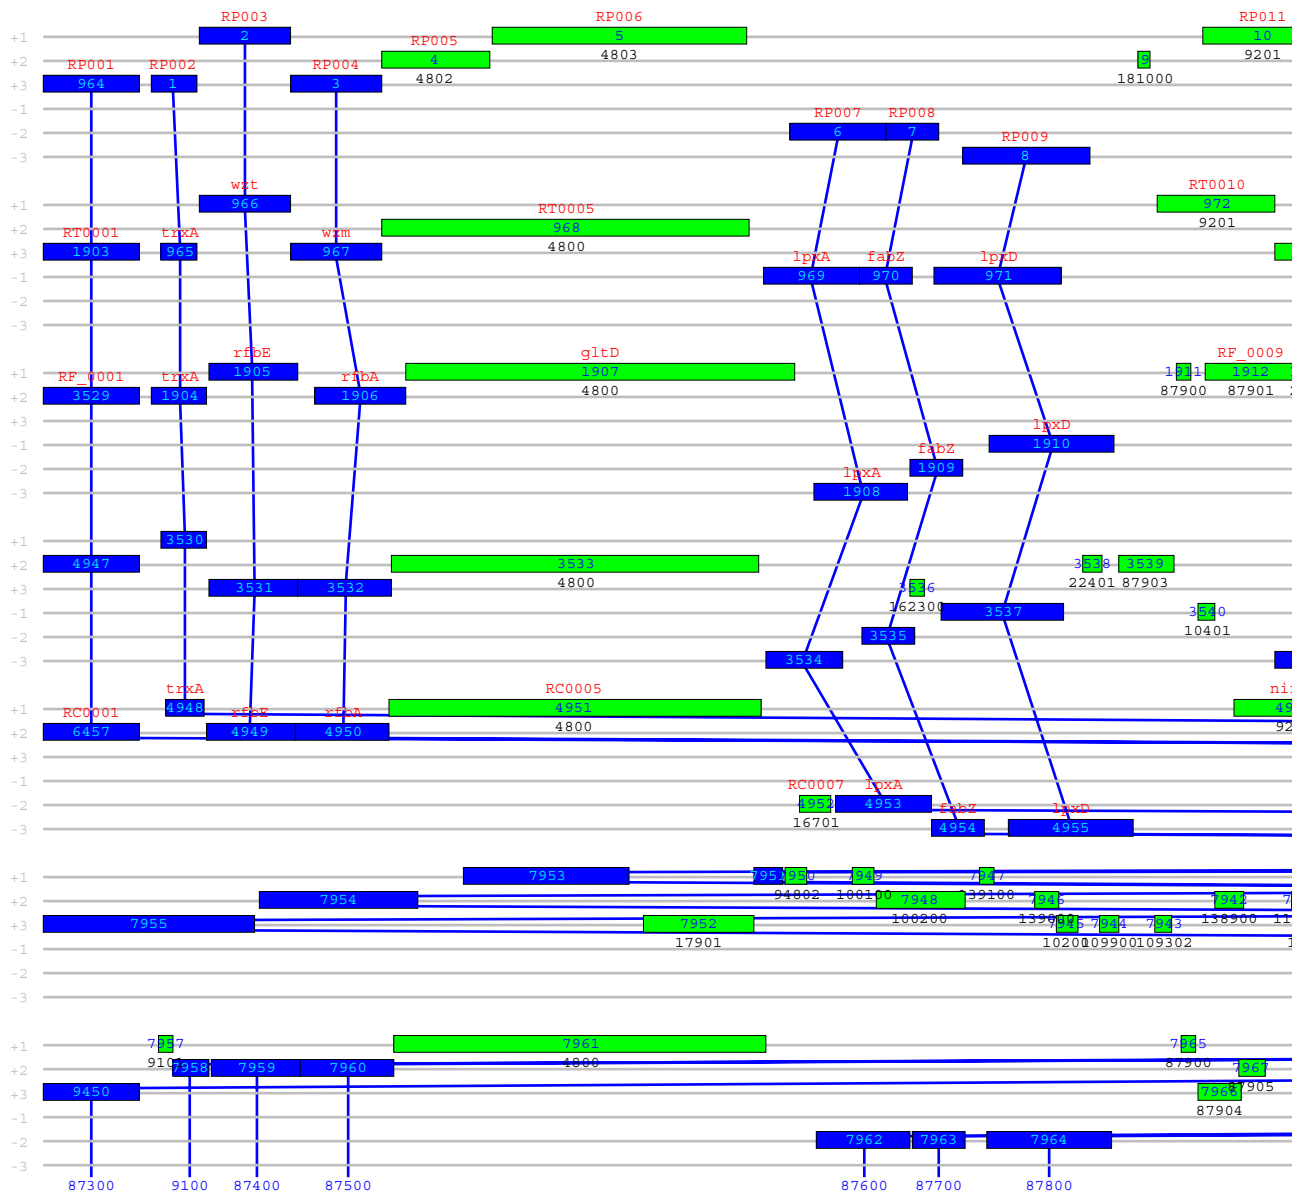

1 Rickettsia prowazekii str. Madrid E, complete genome  
 2 Rickettsia typhi str wilmington, complete genome  
 3 Rickettsia felis URRWXCal2, complete genome  
 4 Rickettsia akari str. Hartford chromosome, whole genome shotgun sequence  
 5 Rickettsia conorii str. Malish 7, complete genome  
 6 Rickettsia sibirica 246 rsib\_agnrcr, whole genome shotgun sequence  
 7 Rickettsia rickettsii chromosome, whole genome shotgun sequence

Reg\_id: 157

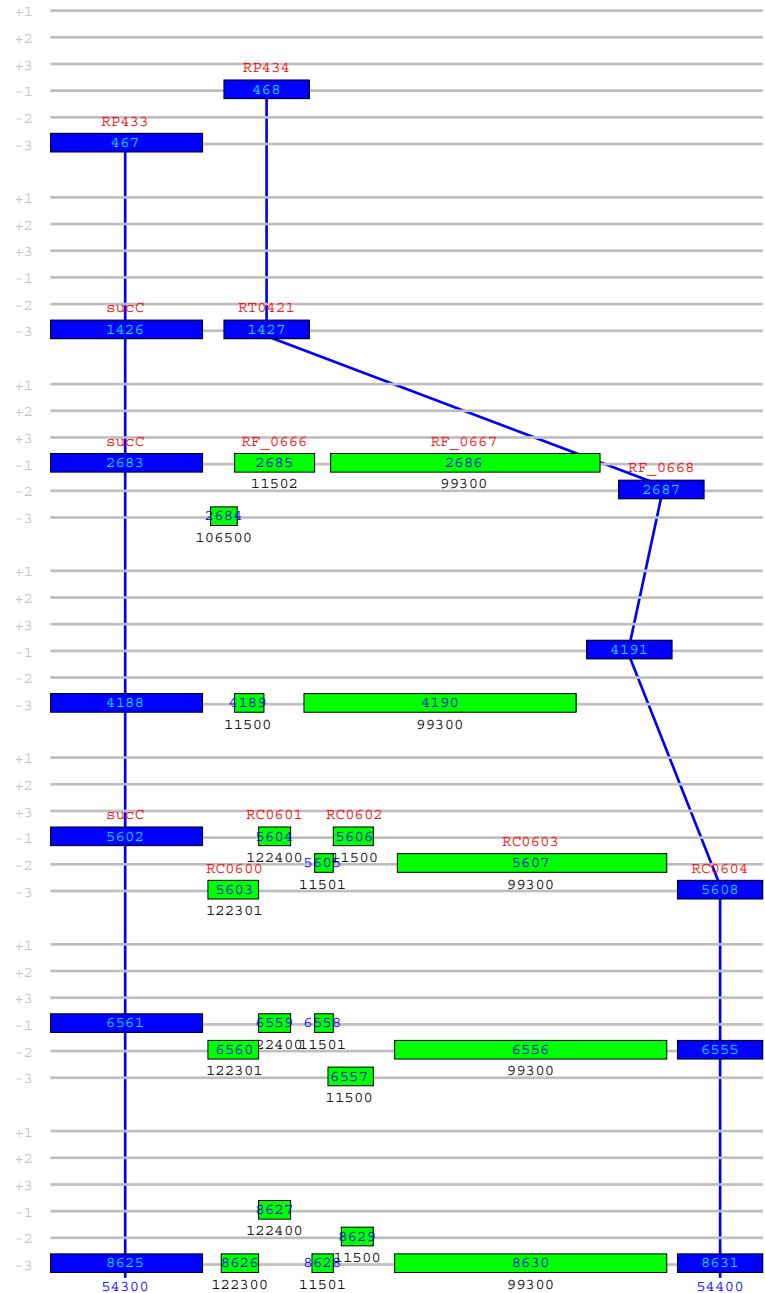

1 Rickettsia prowazekii str. Madrid E, complete genome  
 2 Rickettsia typhi str. wilmington, complete genome  
 3 Rickettsia felis URRWXCal2, complete genome  
 4 Rickettsia akari str. Hartford chromosome, whole genome shotgun sequence  
 5 Rickettsia conorii str. Malish 7, complete genome  
 6 Rickettsia sibirica 246 rsib\_agnrcr, whole genome shotgun sequence  
 7 Rickettsia rickettsii chromosome, whole genome shotgun sequence

Reg\_id: 160

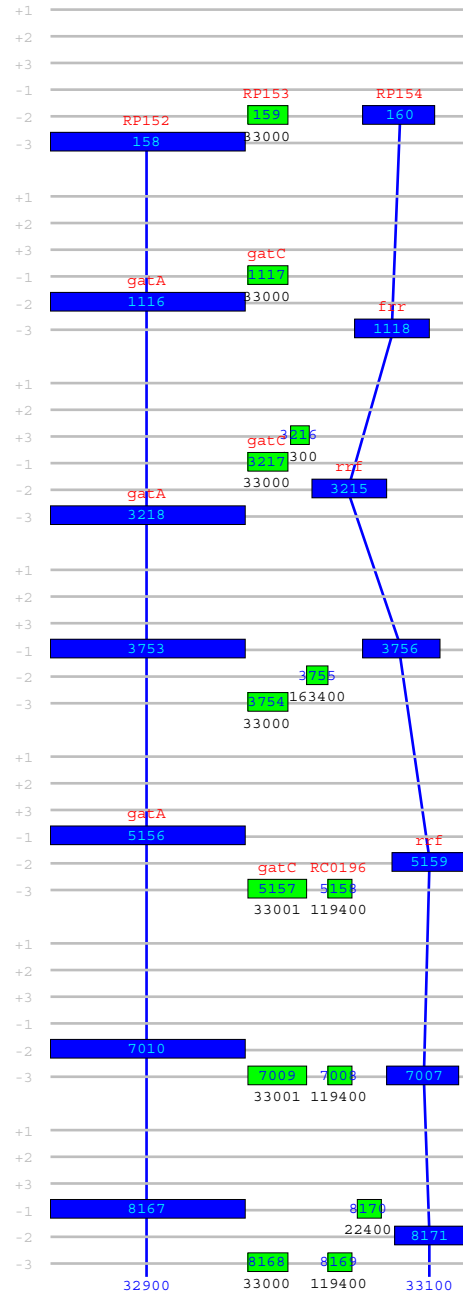

1 Rickettsia prowazekii str. Madrid E, complete genome  
 2 Rickettsia typhi str. wilmington, complete genome  
 3 Rickettsia felis URRWXCal2, complete genome  
 4 Rickettsia akari str. Hartford chromosome, whole genome shotgun sequence  
 5 Rickettsia conorii str. Malish 7, complete genome  
 6 Rickettsia sibirica 246 rsib\_agnrcrt, whole genome shotgun sequence  
 7 Rickettsia rickettsii chromosome, whole genome shotgun sequence

Reg\_id: 161

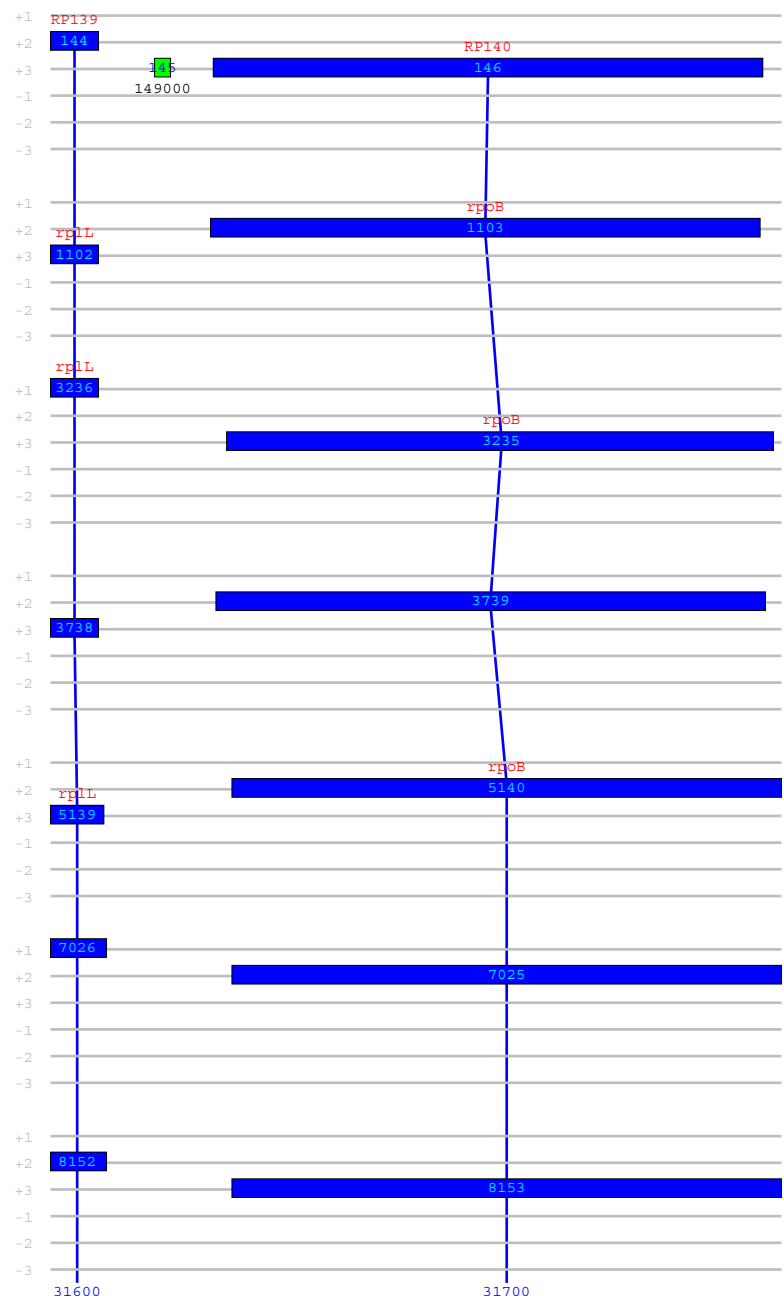



- 1 Rickettsia prowazekii str. Madrid E, complete genome
- 2 Rickettsia typhi str. wilmington, complete genome
- 3 Rickettsia felis URRWXCal2, complete genome
- 4 Rickettsia akari str. Hartford chromosome, whole genome shotgun sequence
- 5 Rickettsia conorii str. Malish 7, complete genome
- 6 Rickettsia sibirica 246 rsib\_agnrcr, whole genome shotgun sequence
- 7 Rickettsia rickettsii chromosome, whole genome shotgun sequence

Reg\_id: 162

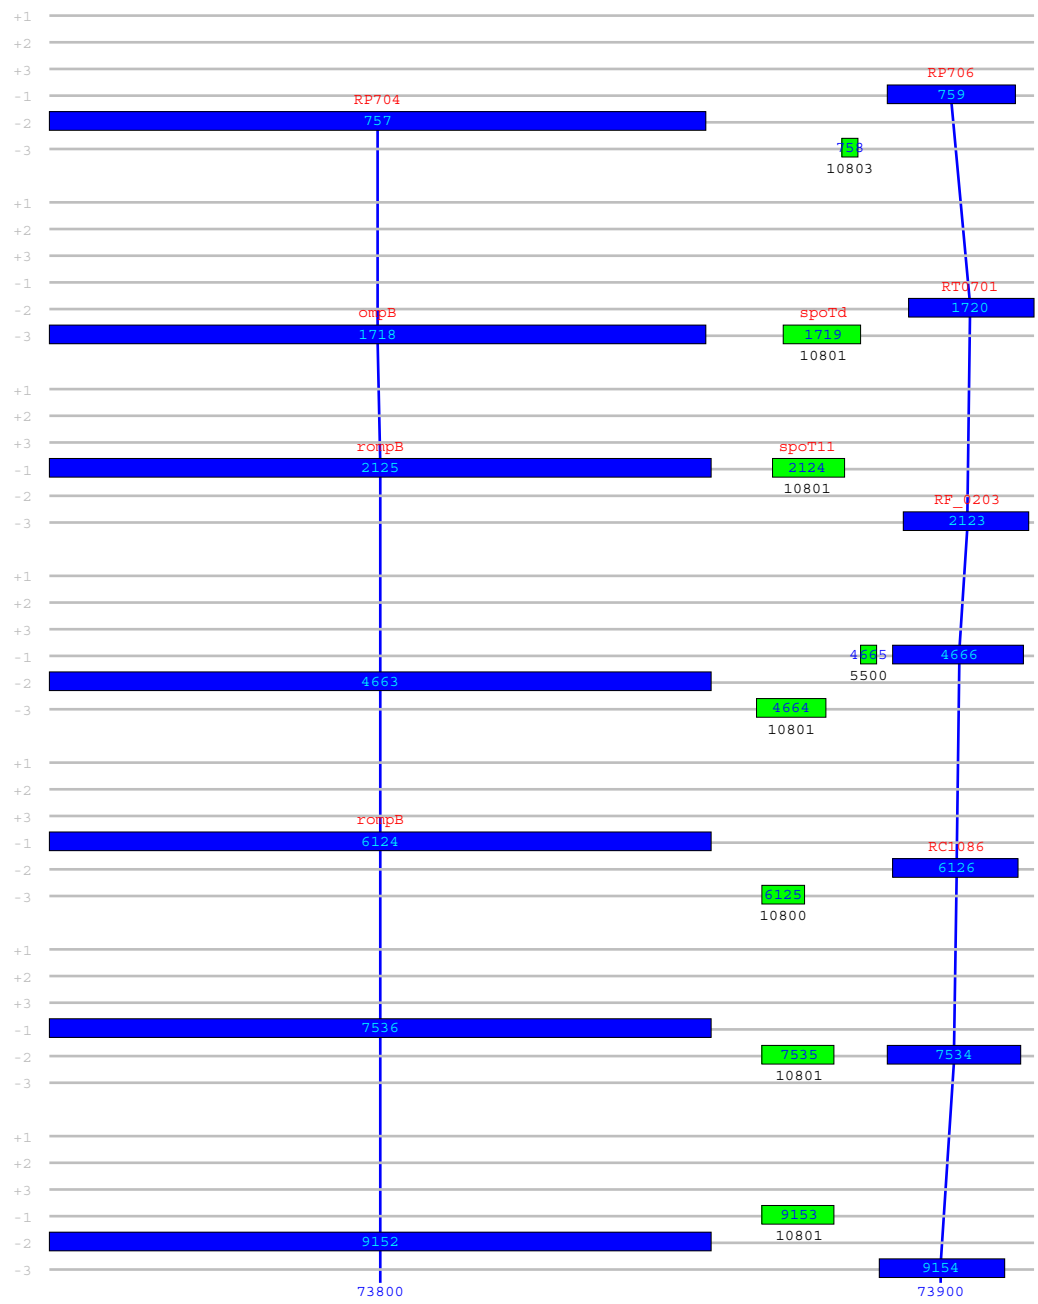

1 Rickettsia prowazekii str. Madrid E, complete genome  
 2 Rickettsia typhi str. wilmington, complete genome  
 3 Rickettsia felis URRWXCal2, complete genome  
 4 Rickettsia akari str. Hartford chromosome, whole genome shotgun sequence  
 5 Rickettsia conorii str. Malish 7, complete genome  
 6 Rickettsia sibirica 246 rsib\_agnrct, whole genome shotgun sequence  
 7 Rickettsia rickettsii chromosome, whole genome shotgun sequence

Reg\_id: 163

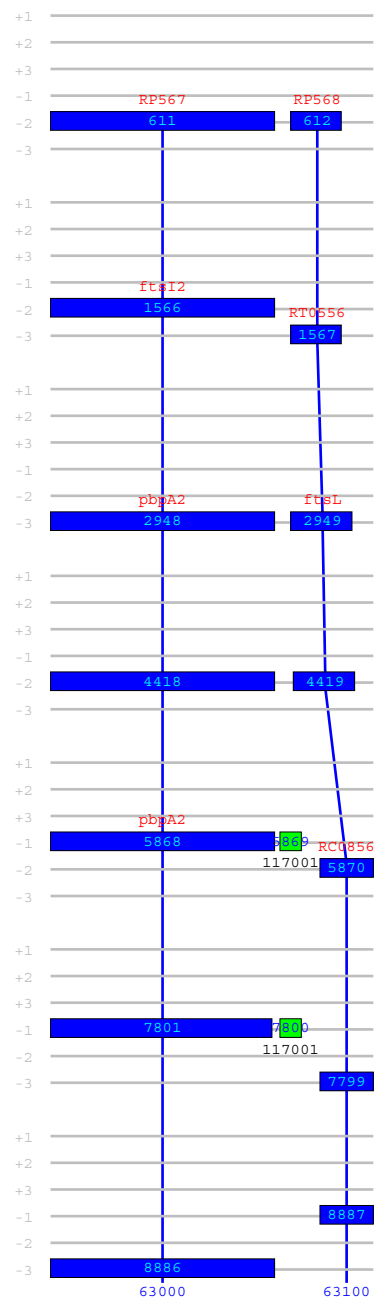

- 1 Rickettsia prowazekii str. Madrid E, complete genome
- 2 Rickettsia typhi str. wilmington, complete genome
- 3 Rickettsia felis URRWXCal2, complete genome
- 4 Rickettsia akari str. Hartford chromosome, whole genome shotgun sequence
- 5 Rickettsia conorii str. Malish 7, complete genome
- 6 Rickettsia sibirica 246 rsib\_agnrcr, whole genome shotgun sequence
- 7 Rickettsia rickettsii chromosome, whole genome shotgun sequence

Reg\_id: 164

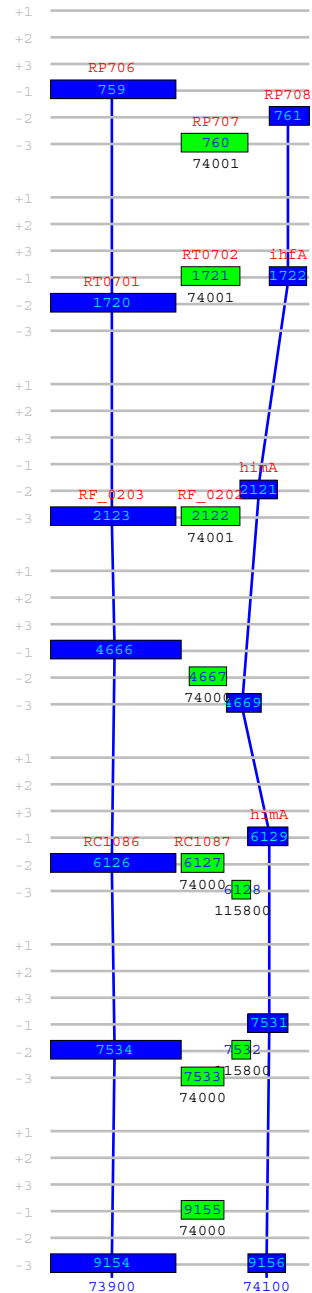

1 Rickettsia prowazekii str. Madrid E, complete genome  
 2 Rickettsia typhi str. wilmington, complete genome  
 3 Rickettsia felis URRWXCal2, complete genome  
 4 Rickettsia akari str. Hartford chromosome, whole genome shotgun sequence  
 5 Rickettsia conorii str. Malish 7, complete genome  
 6 Rickettsia sibirica 246 rsib\_agnrcr, whole genome shotgun sequence  
 7 Rickettsia rickettsii chromosome, whole genome shotgun sequence

Reg\_id: 166

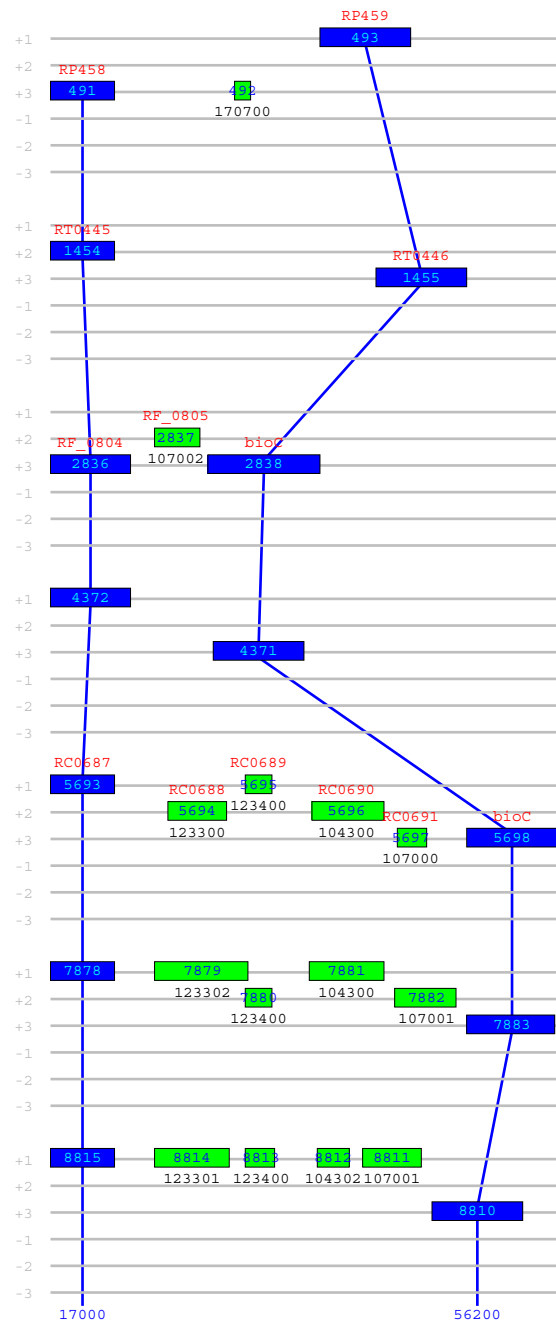

1 Rickettsia prowazekii str. Madrid E, complete genome  
 2 Rickettsia typhi str. wilmington, complete genome  
 3 Rickettsia felis URRWXCal2, complete genome  
 4 Rickettsia akari str. Hartford chromosome, whole genome shotgun sequence  
 5 Rickettsia conorii str. Malish 7, complete genome  
 6 Rickettsia sibirica 246 rsib\_agnrcr, whole genome shotgun sequence  
 7 Rickettsia rickettsii chromosome, whole genome shotgun sequence

Reg\_id: 168

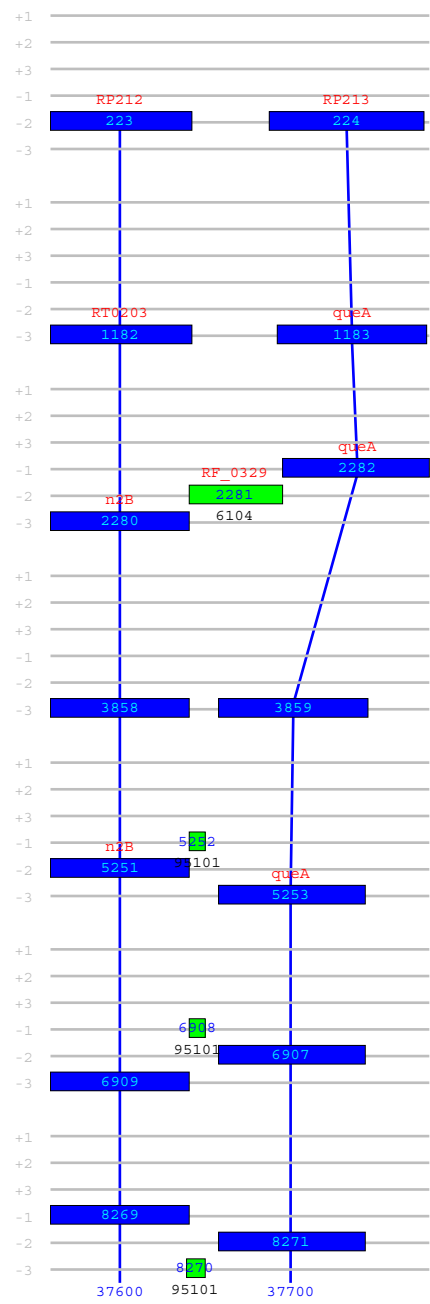

1 Rickettsia prowazekii str. Madrid E, complete genome  
 2 Rickettsia typhi str. wilmington, complete genome  
 3 Rickettsia felis URRWXCal2, complete genome  
 4 Rickettsia akari str. Hartford chromosome, whole genome shotgun sequence  
 5 Rickettsia conorii str. Malish 7, complete genome  
 6 Rickettsia sibirica 246 rsib\_agnrcr, whole genome shotgun sequence  
 7 Rickettsia rickettsii chromosome, whole genome shotgun sequence

Reg\_id: 169

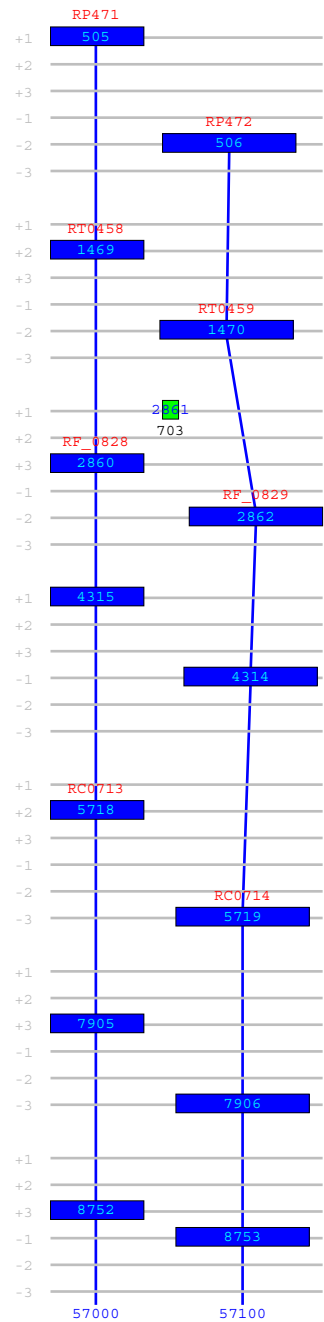



- 1 Rickettsia prowazekii str. Madrid E, complete genome
- 2 Rickettsia typhi str. wilmington, complete genome
- 3 Rickettsia felis URRWXCal2, complete genome
- 4 Rickettsia akari str. Hartford chromosome, whole genome shotgun sequence
- 5 Rickettsia conorii str. Malish 7, complete genome
- 6 Rickettsia sibirica 246 rsib\_agncrt, whole genome shotgun sequence
- 7 Rickettsia rickettsii chromosome, whole genome shotgun sequence

Reg\_id: 177

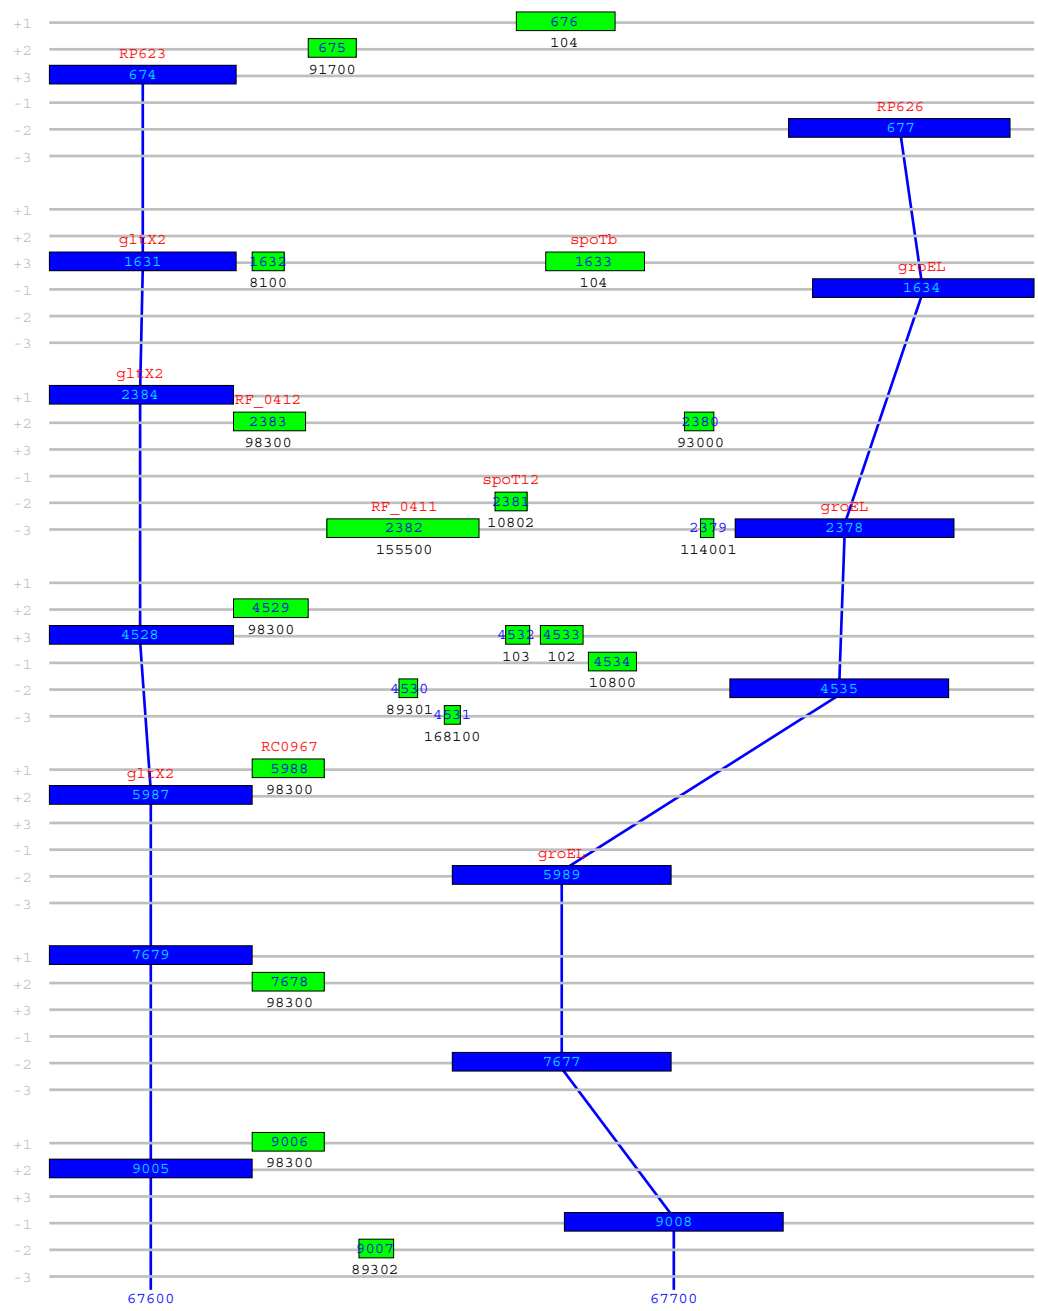



1 Rickettsia prowazekii str. Madrid E, complete genome  
 2 Rickettsia typhi str. wilmington, complete genome  
 3 Rickettsia felis URRWXCal2, complete genome  
 4 Rickettsia akari str. Hartford chromosome, whole genome shotgun sequence  
 5 Rickettsia conorii str. Malish 7, complete genome  
 6 Rickettsia sibirica 246 rsib\_agnrcr, whole genome shotgun sequence  
 7 Rickettsia rickettsii chromosome, whole genome shotgun sequence

Reg\_id: 181

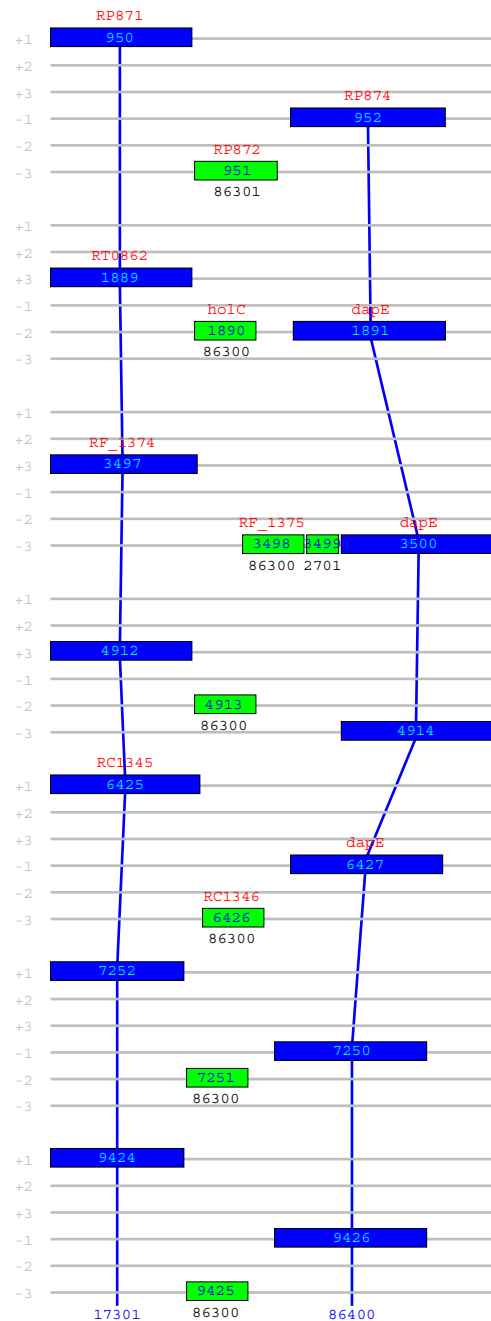

- 1 Rickettsia prowazekii str. Madrid E, complete genome
- 2 Rickettsia typhi str. wilmington, complete genome
- 3 Rickettsia felis URRWXCal2, complete genome
- 4 Rickettsia akari str. Hartford chromosome, whole genome shotgun sequence
- 5 Rickettsia conorii str. Malish 7, complete genome
- 6 Rickettsia sibirica 246 rsib\_agnrct, whole genome shotgun sequence
- 7 Rickettsia rickettsii chromosome, whole genome shotgun sequence

Reg\_id: 182

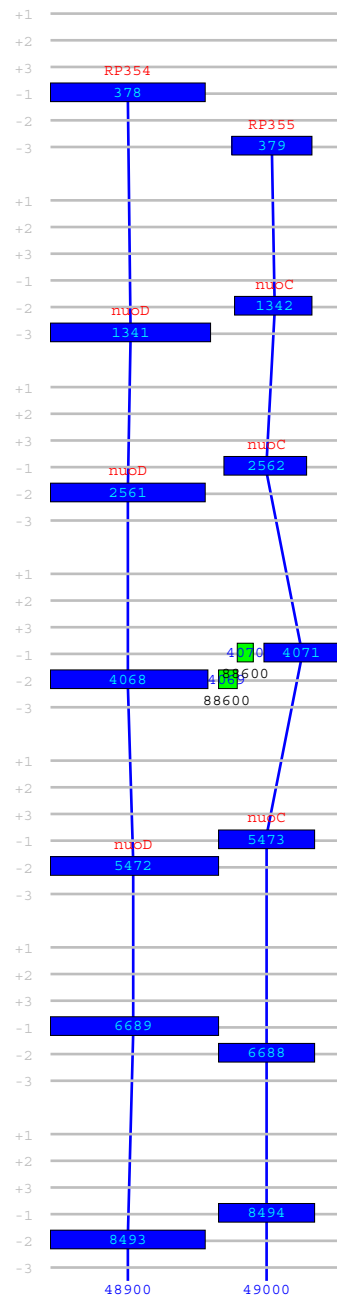

1 Rickettsia prowazekii str. Madrid E, complete genome  
 2 Rickettsia typhi str. wilmington, complete genome  
 3 Rickettsia felis URRWXCal2, complete genome  
 4 Rickettsia akari str. Hartford chromosome, whole genome shotgun sequence  
 5 Rickettsia conorii str. Malish 7, complete genome  
 6 Rickettsia sibirica 246 rsib\_agnrct, whole genome shotgun sequence  
 7 Rickettsia rickettsii chromosome, whole genome shotgun sequence

Reg\_id: 184

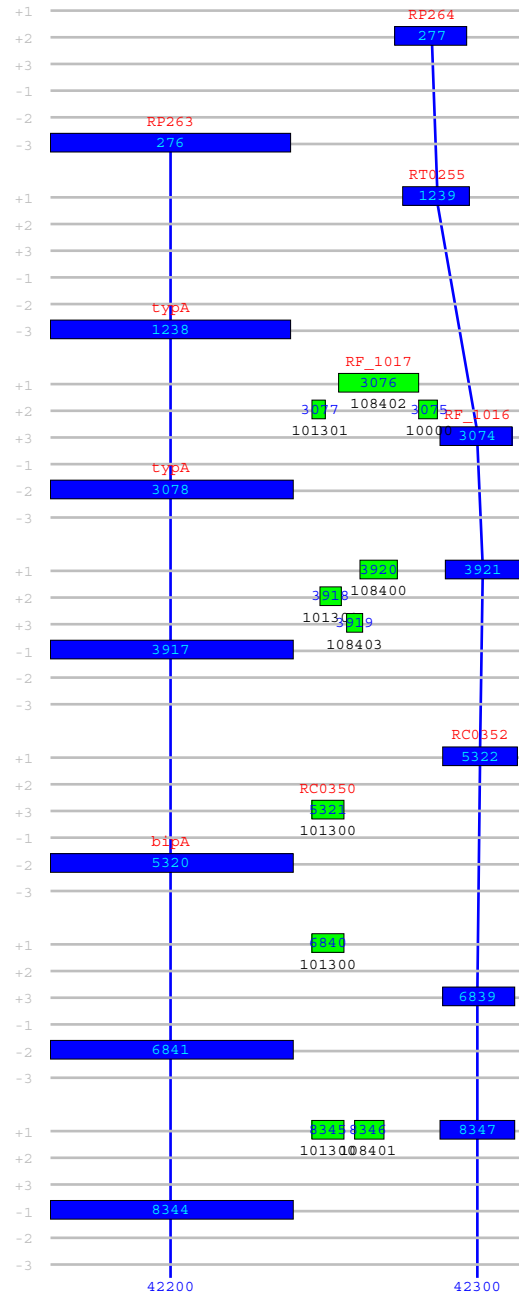

1 Rickettsia prowazekii str. Madrid E, complete genome  
 2 Rickettsia typhi str. wilmington, complete genome  
 3 Rickettsia felis URRWXCal2, complete genome  
 4 Rickettsia akari str. Hartford chromosome, whole genome shotgun sequence  
 5 Rickettsia conorii str. Malish 7, complete genome  
 6 Rickettsia sibirica 246 rsib\_agnrcr, whole genome shotgun sequence  
 7 Rickettsia rickettsii chromosome, whole genome shotgun sequence

Reg\_id: 186

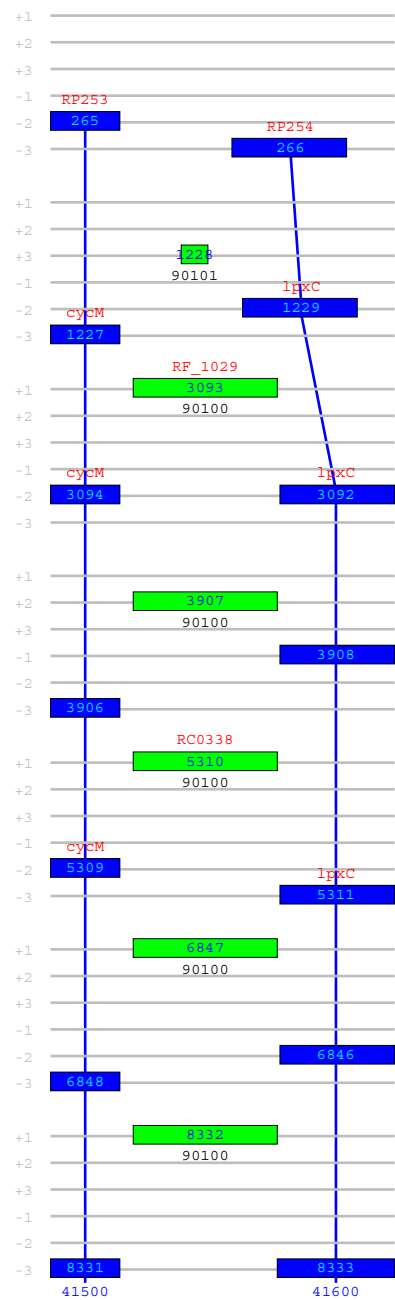

- 1 Rickettsia prowazekii str. Madrid E, complete genome
- 2 Rickettsia typhi str. wilmington, complete genome
- 3 Rickettsia felis URRWXCal2, complete genome
- 4 Rickettsia akari str. Hartford chromosome, whole genome shotgun sequence
- 5 Rickettsia conorii str. Malish 7, complete genome
- 6 Rickettsia sibirica 246 rsib\_agnrcr, whole genome shotgun sequence
- 7 Rickettsia rickettsii chromosome, whole genome shotgun sequence

Reg\_id: 187

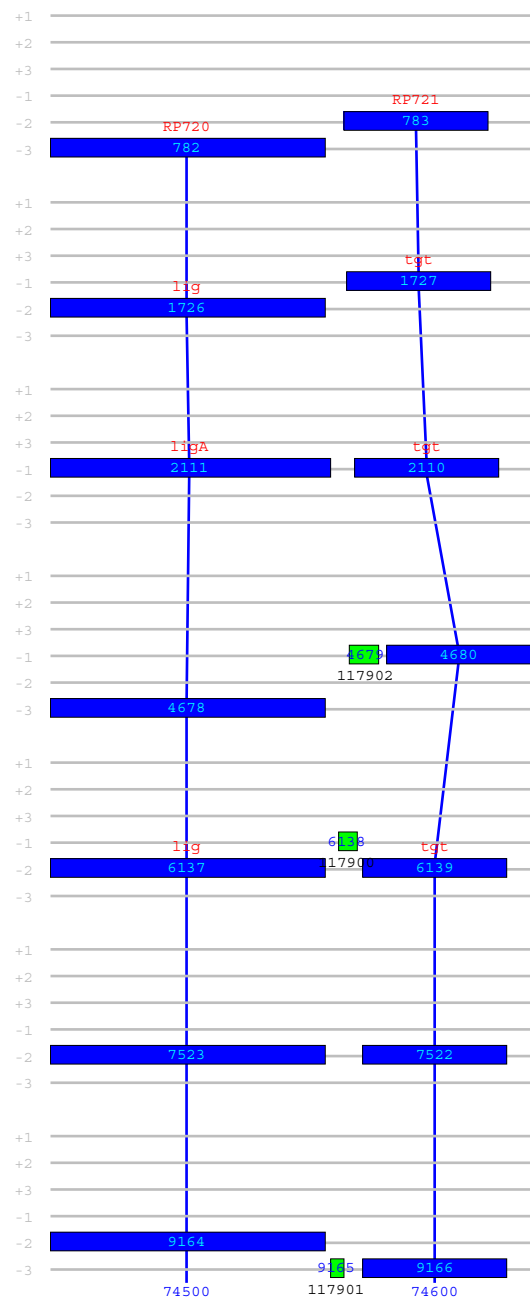

1 Rickettsia prowazekii str. Madrid E, complete genome  
 2 Rickettsia typhi str. wilmington, complete genome  
 3 Rickettsia felis URRWXCal2, complete genome  
 4 Rickettsia akari str. Hartford chromosome, whole genome shotgun sequence  
 5 Rickettsia conorii str. Malish 7, complete genome  
 6 Rickettsia sibirica 246 rsib\_agnrct, whole genome shotgun sequence  
 7 Rickettsia rickettsii chromosome, whole genome shotgun sequence

Reg\_id: 191

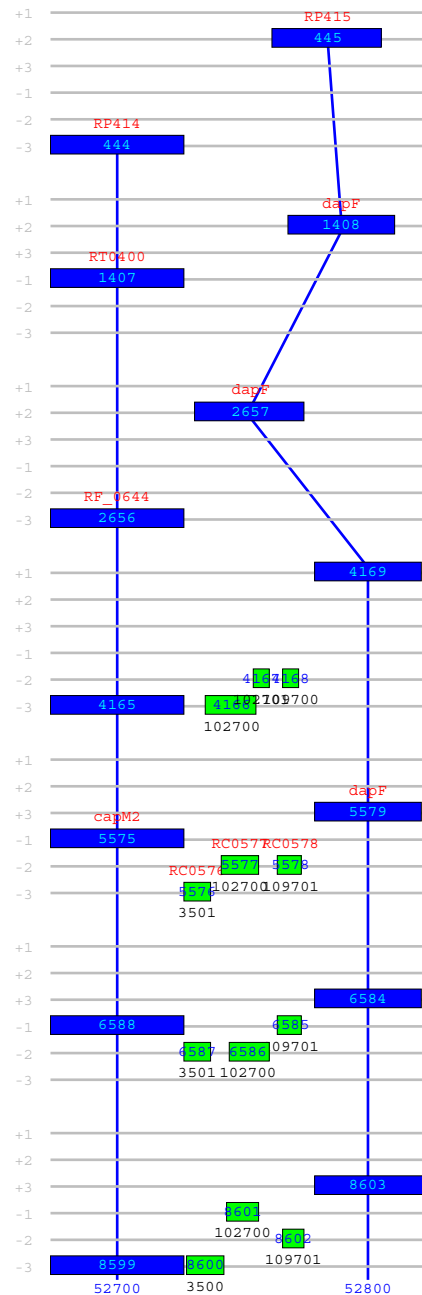

- 1 Rickettsia prowazekii str. Madrid E, complete genome
- 2 Rickettsia typhi str. wilmington, complete genome
- 3 Rickettsia felis URRWXCal2, complete genome
- 4 Rickettsia akari str. Hartford chromosome, whole genome shotgun sequence
- 5 Rickettsia conorii str. Malish 7, complete genome
- 6 Rickettsia sibirica 246 rsib\_agnrct, whole genome shotgun sequence
- 7 Rickettsia rickettsii chromosome, whole genome shotgun sequence

Reg\_id: 193

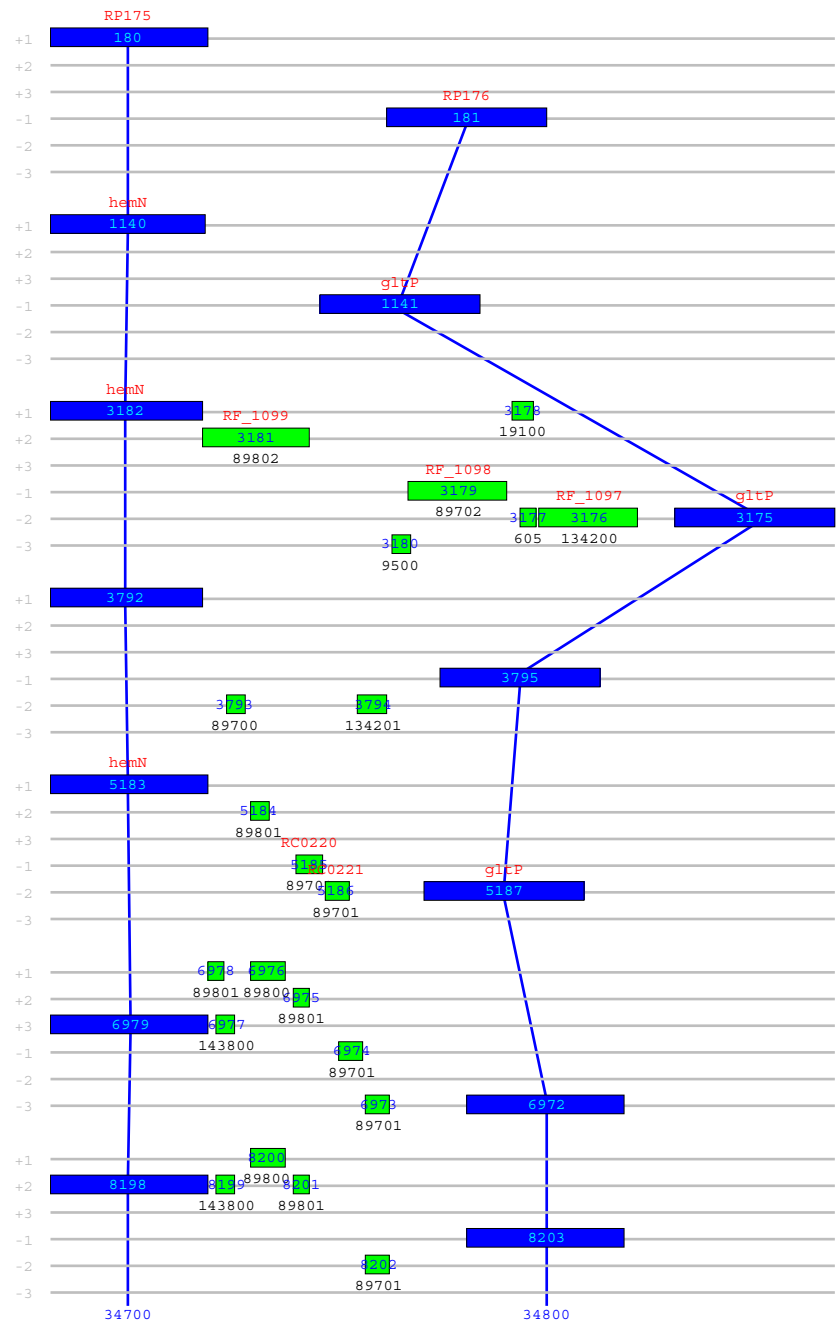

1 Rickettsia prowazekii str. Madrid E, complete genome  
 2 Rickettsia typhi str. wilmington, complete genome  
 3 Rickettsia felis URRWXCal2, complete genome  
 4 Rickettsia akari str. Hartford chromosome, whole genome shotgun sequence  
 5 Rickettsia conorii str. Malish 7, complete genome  
 6 Rickettsia sibirica 246 rsib\_agnrcr, whole genome shotgun sequence  
 7 Rickettsia rickettsii chromosome, whole genome shotgun sequence

Reg\_id: 196

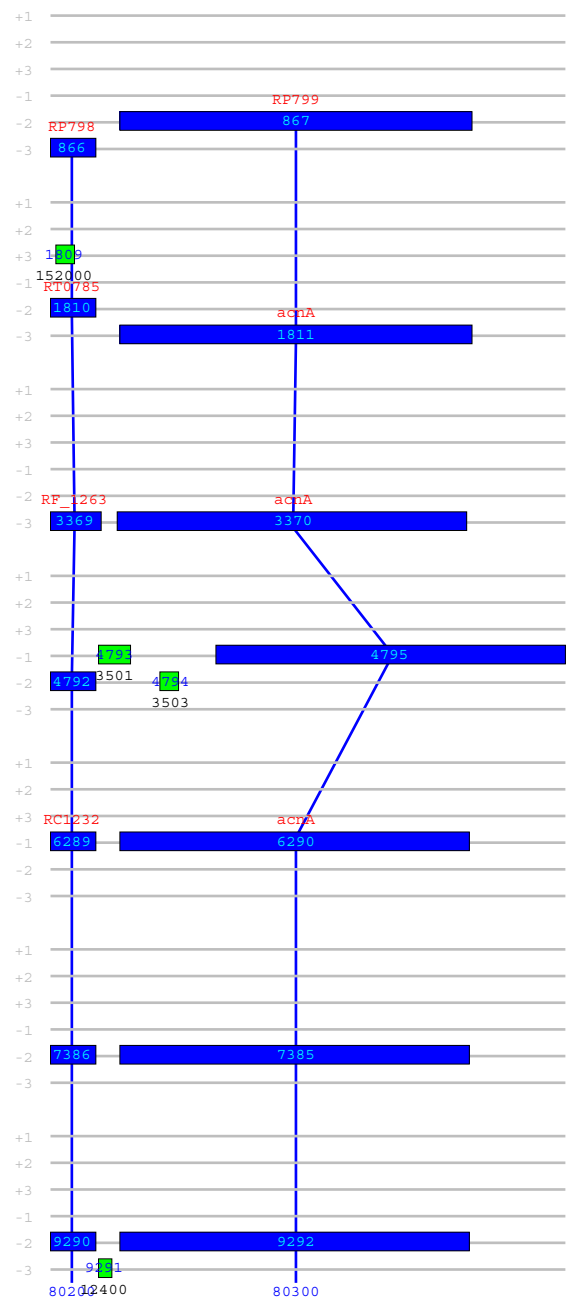



- 1 Rickettsia prowazekii str. Madrid E, complete genome
- 2 Rickettsia typhi str. wilmington, complete genome
- 3 Rickettsia felis URRWXCa2, complete genome
- 4 Rickettsia akari str. Hartford chromosome, whole genome shotgun sequence
- 5 Rickettsia conorii str. Malish 7, complete genome
- 6 Rickettsia sibirica 246 rsib\_agnrcr, whole genome shotgun sequence
- 7 Rickettsia rickettsii chromosome, whole genome shotgun sequence

Reg\_id: 197

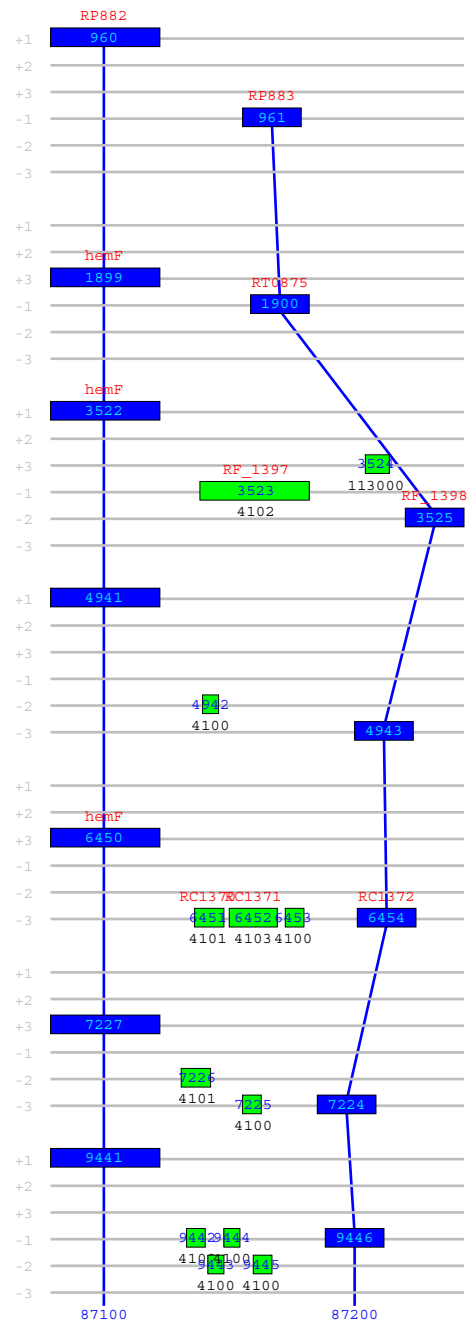

- 1 Rickettsia prowazekii str. Madrid E, complete genome
- 2 Rickettsia typhi str. wilmington, complete genome
- 3 Rickettsia felis URRWXCal2, complete genome
- 4 Rickettsia akari str. Hartford chromosome, whole genome shotgun sequence
- 5 Rickettsia conorii str. Malish 7, complete genome
- 6 Rickettsia sibirica 246 rsib\_agnrct, whole genome shotgun sequence
- 7 Rickettsia rickettsii chromosome, whole genome shotgun sequence

Reg\_id: 199

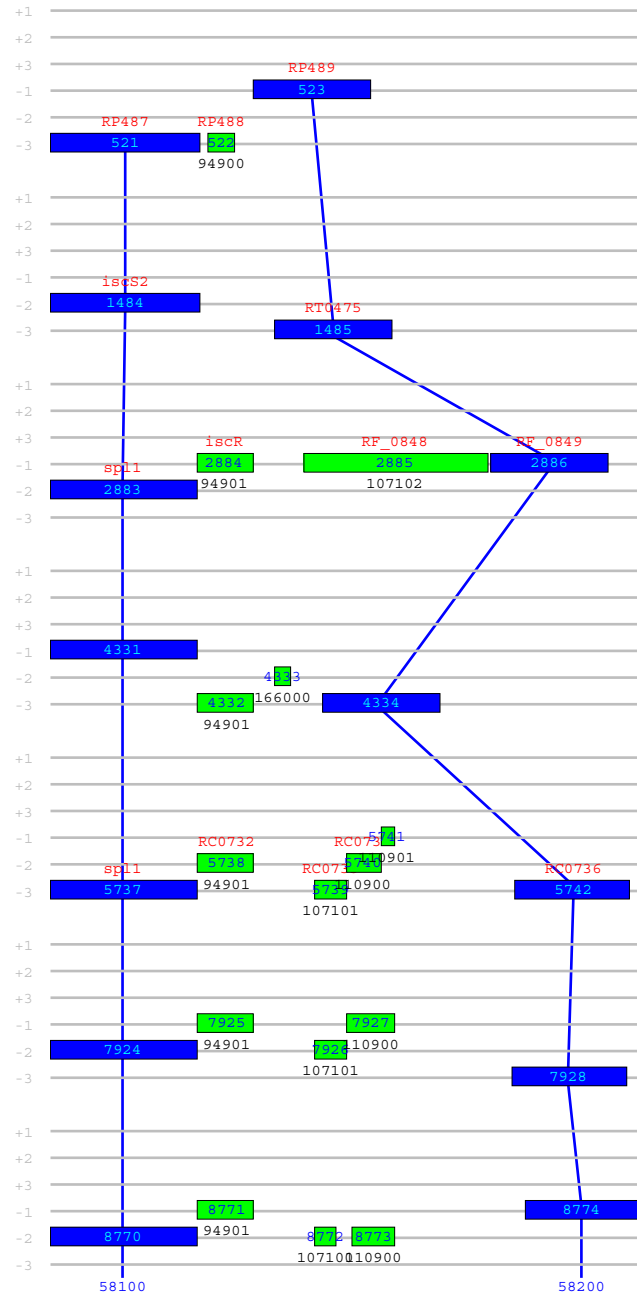

1 Rickettsia prowazekii str. Madrid E, complete genome  
 2 Rickettsia typhi str. wilmington, complete genome  
 3 Rickettsia felis URRWXCal2, complete genome  
 4 Rickettsia akari str. Hartford chromosome, whole genome shotgun sequence  
 5 Rickettsia conorii str. Malish 7, complete genome  
 6 Rickettsia sibirica 246 rsib\_agnrct, whole genome shotgun sequence  
 7 Rickettsia rickettsii chromosome, whole genome shotgun sequence

Reg\_id: 200

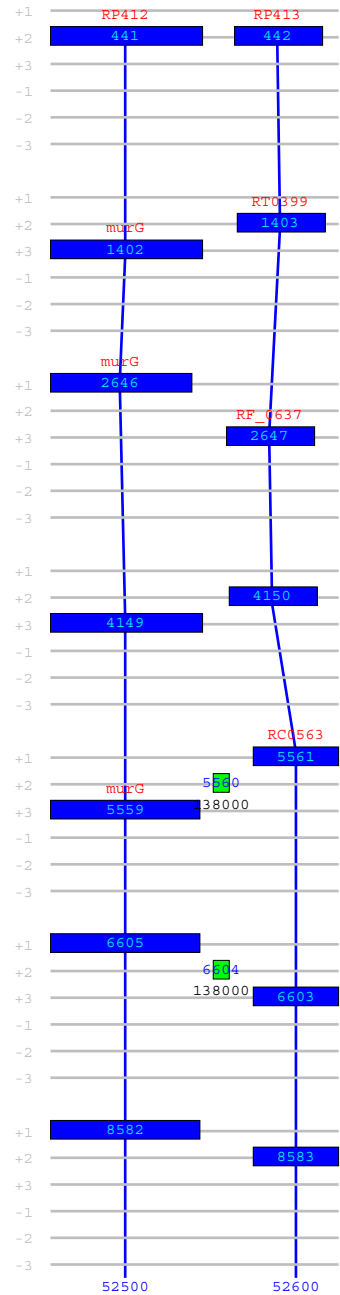

1 Rickettsia prowazekii str. Madrid E, complete genome  
 2 Rickettsia typhi str. wilmington, complete genome  
 3 Rickettsia felis URRWXCal2, complete genome  
 4 Rickettsia akari str. Hartford chromosome, whole genome shotgun sequence  
 5 Rickettsia conorii str. Malish 7, complete genome  
 6 Rickettsia sibirica 246 rsib\_agncrt, whole genome shotgun sequence  
 7 Rickettsia rickettsii chromosome, whole genome shotgun sequence

Reg\_id: 204

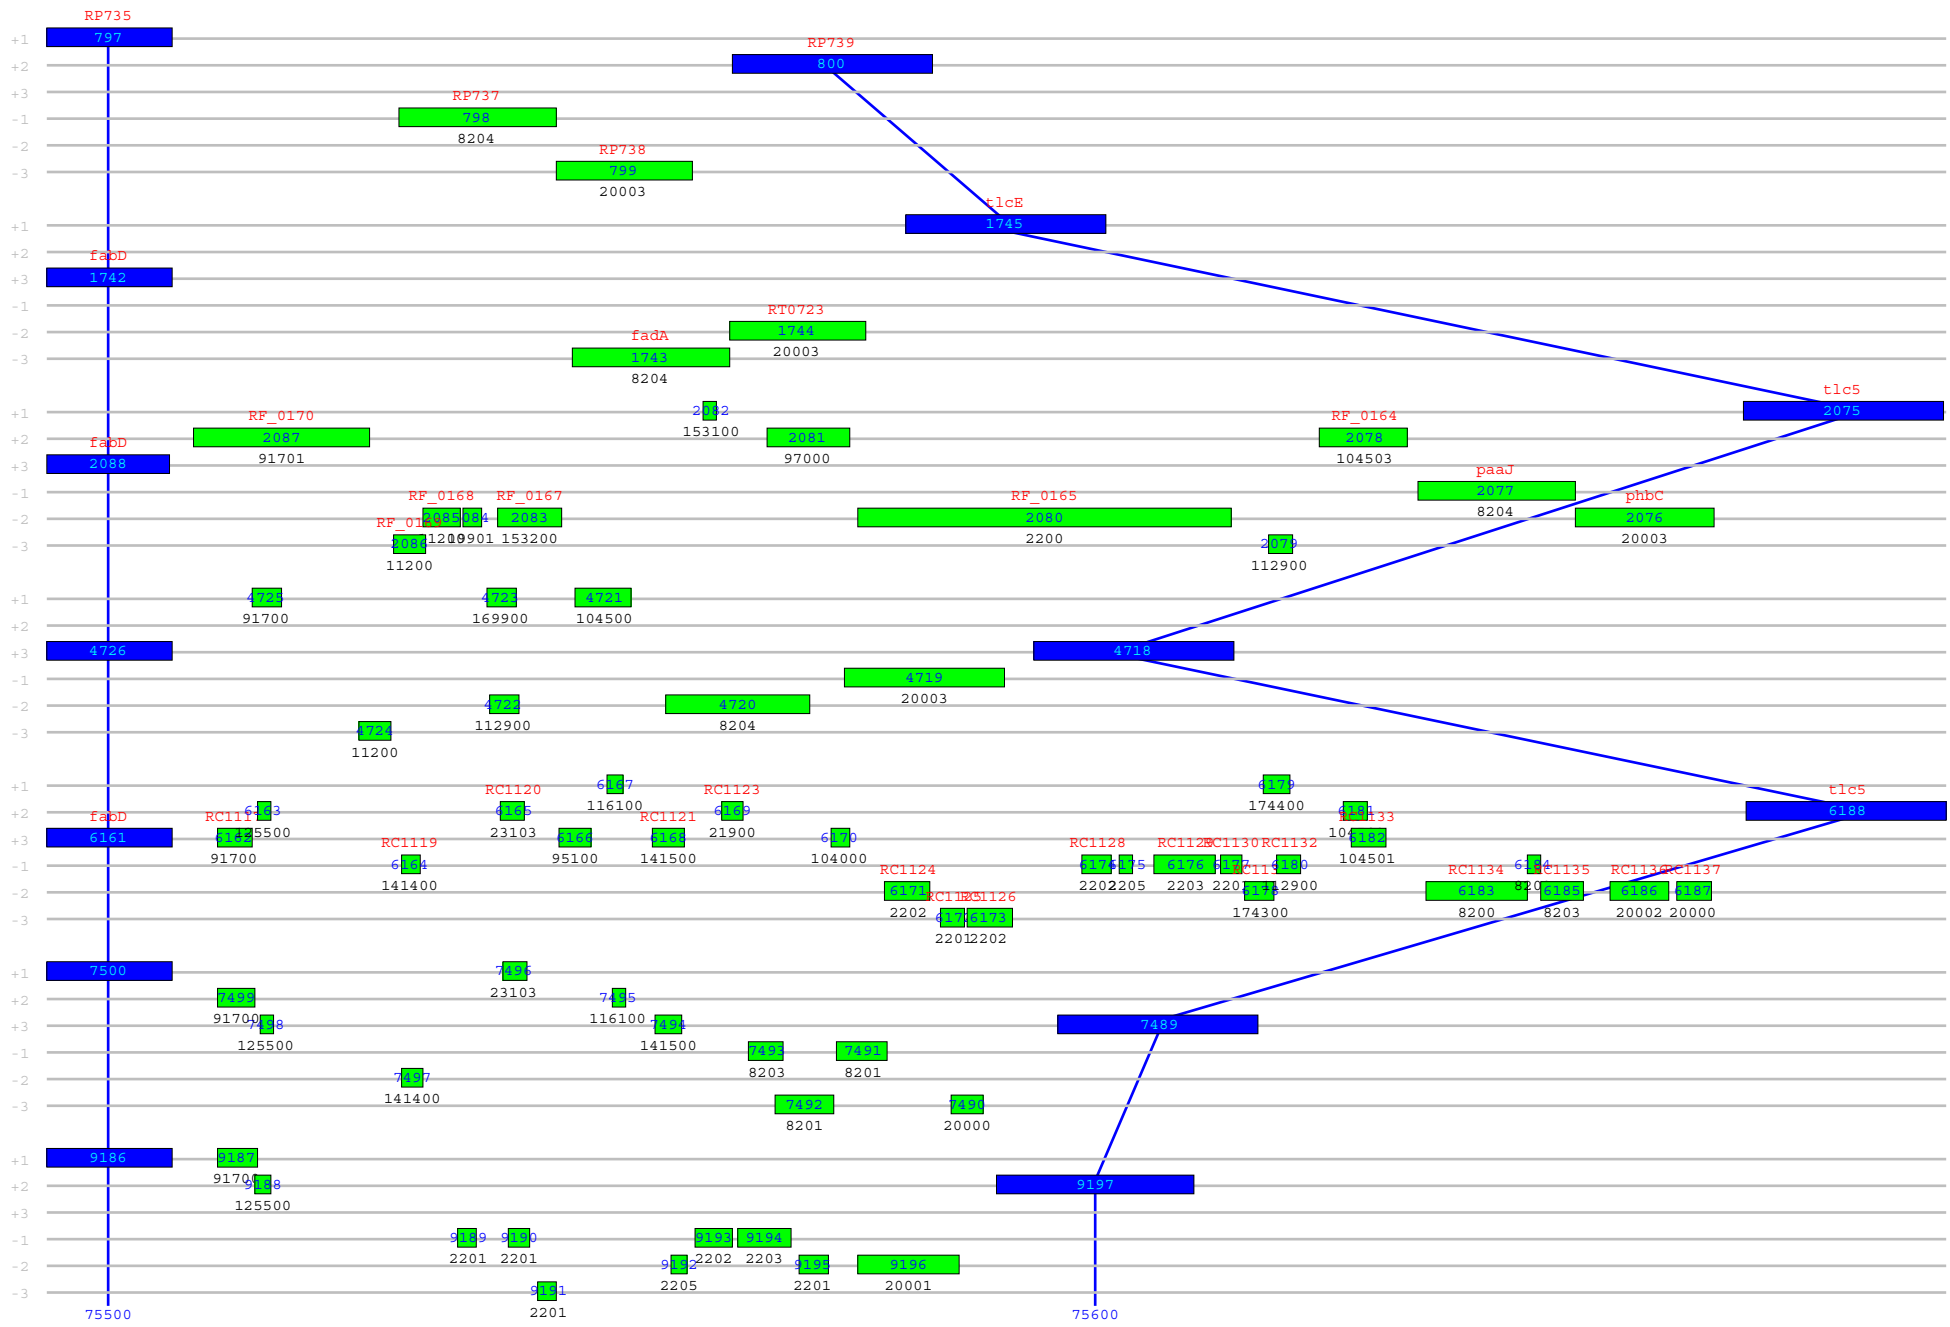

1 Rickettsia prowazekii str. Madrid E, complete genome  
 2 Rickettsia typhi str. wilmington, complete genome  
 3 Rickettsia felis URRWXCa12, complete genome  
 4 Rickettsia akari str. Hartford chromosome, whole genome shotgun sequence  
 5 Rickettsia conorii str. Malish 7, complete genome  
 6 Rickettsia sibirica 246 rsib agncrt, whole genome shotgun sequence  
 7 Rickettsia rickettsii chromosome, whole genome shotgun sequence

Reg\_id: 205

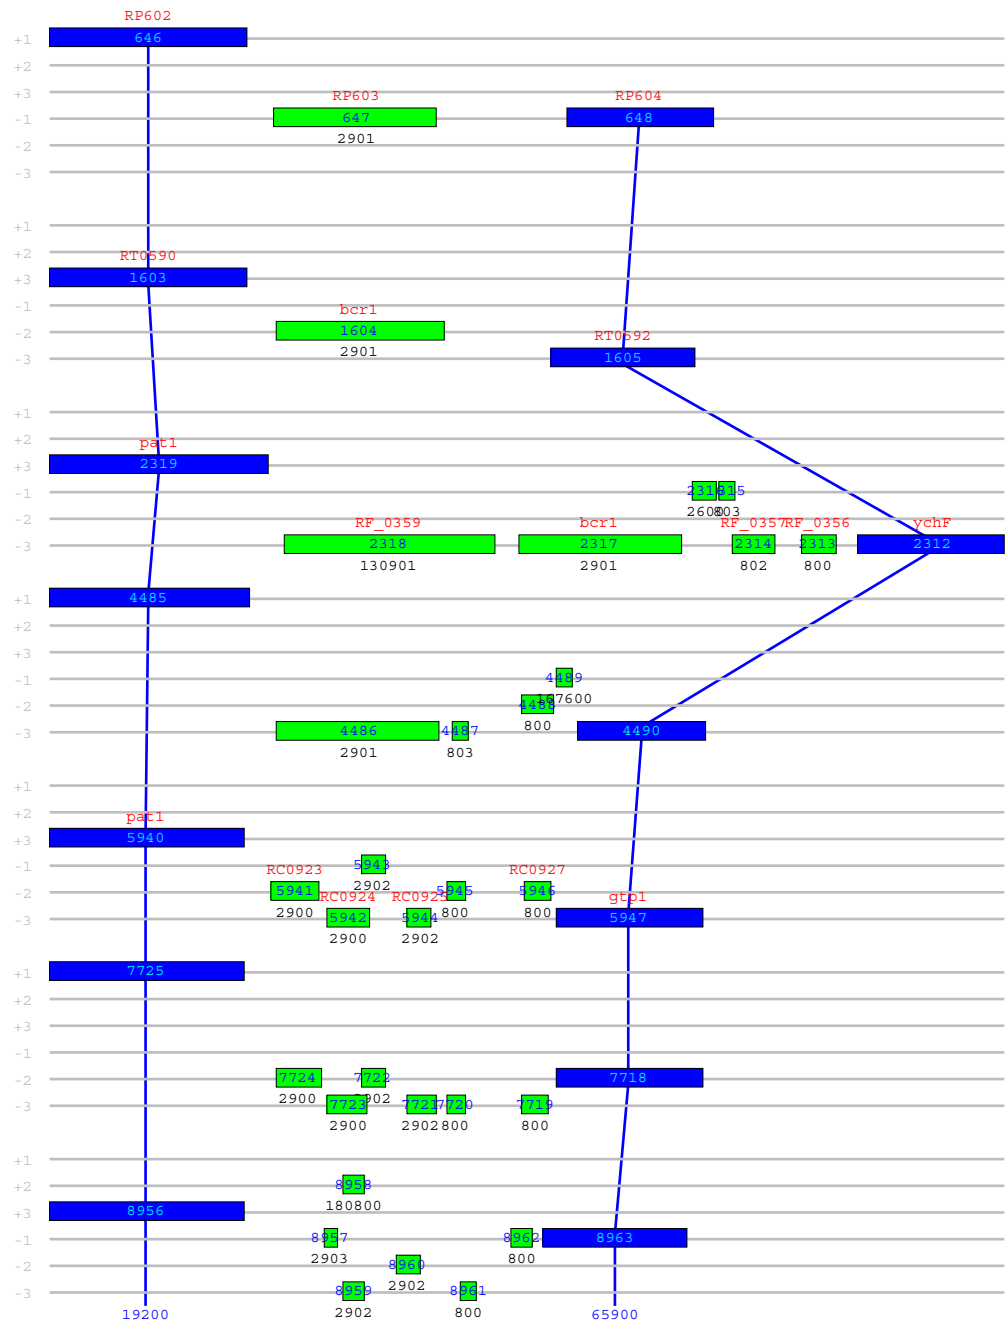

1 Rickettsia prowazekii str. Madrid E, complete genome  
 2 Rickettsia typhi str. wilmington, complete genome  
 3 Rickettsia felis URRWXCal2, complete genome  
 4 Rickettsia akari str. Hartford chromosome, whole genome shotgun sequence  
 5 Rickettsia conorii str. Malish 7, complete genome  
 6 Rickettsia sibirica 246 rsib\_agnrct, whole genome shotgun sequence  
 7 Rickettsia rickettsii chromosome, whole genome shotgun sequence

Reg\_id: 208

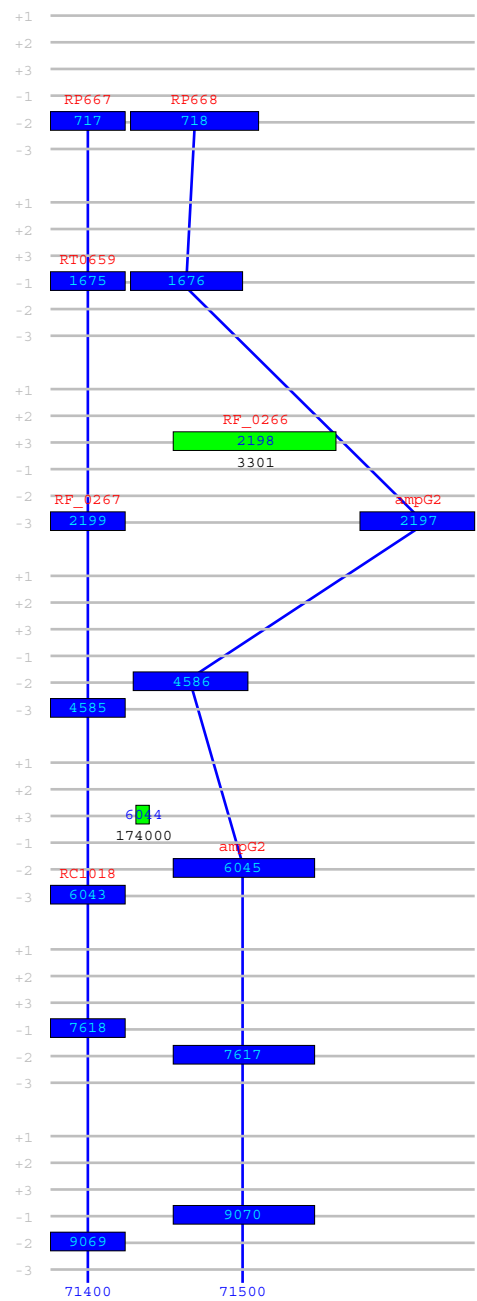

1 Rickettsia prowazekii str. Madrid E, complete genome  
 2 Rickettsia typhi str. wilmington, complete genome  
 3 Rickettsia felis URRWXCal2, complete genome  
 4 Rickettsia akari str. Hartford chromosome, whole genome shotgun sequence  
 5 Rickettsia conorii str. Malish 7, complete genome  
 6 Rickettsia sibirica 246 rsib\_agnrcr, whole genome shotgun sequence  
 7 Rickettsia rickettsii chromosome, whole genome shotgun sequence

Reg\_id: 209

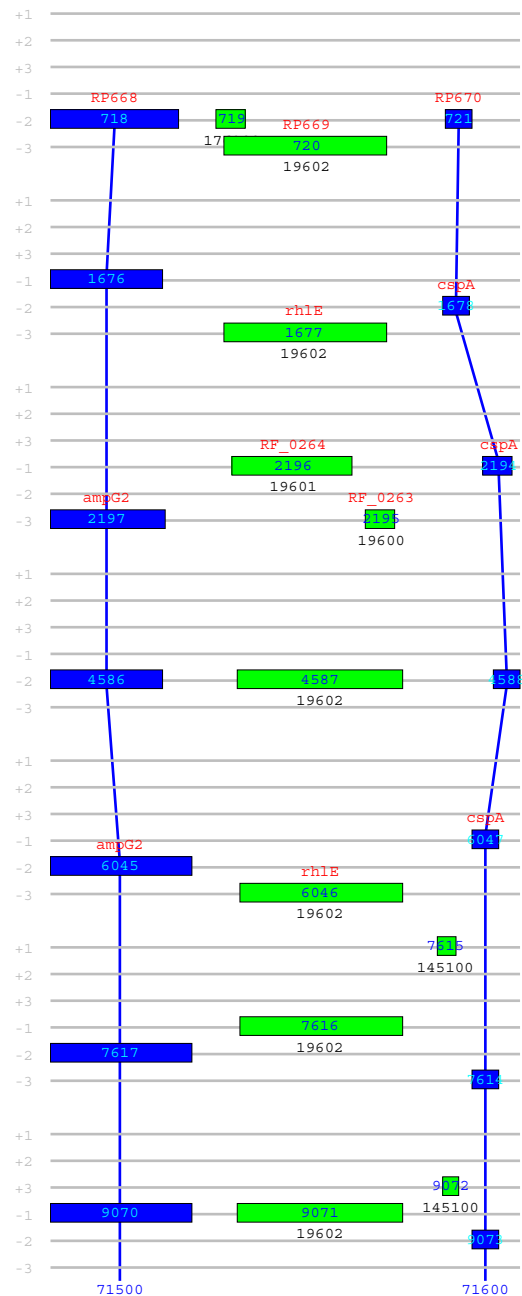

- 1 Rickettsia prowazekii str. Madrid E, complete genome
- 2 Rickettsia typhi str. wilmington, complete genome
- 3 Rickettsia felis URRWXCal2, complete genome
- 4 Rickettsia akari str. Hartford chromosome, whole genome shotgun sequence
- 5 Rickettsia conorii str. Malish 7, complete genome
- 6 Rickettsia sibirica 246 rsib\_agnrt, whole genome shotgun sequence
- 7 Rickettsia rickettsii chromosome, whole genome shotgun sequence

Reg\_id: 212

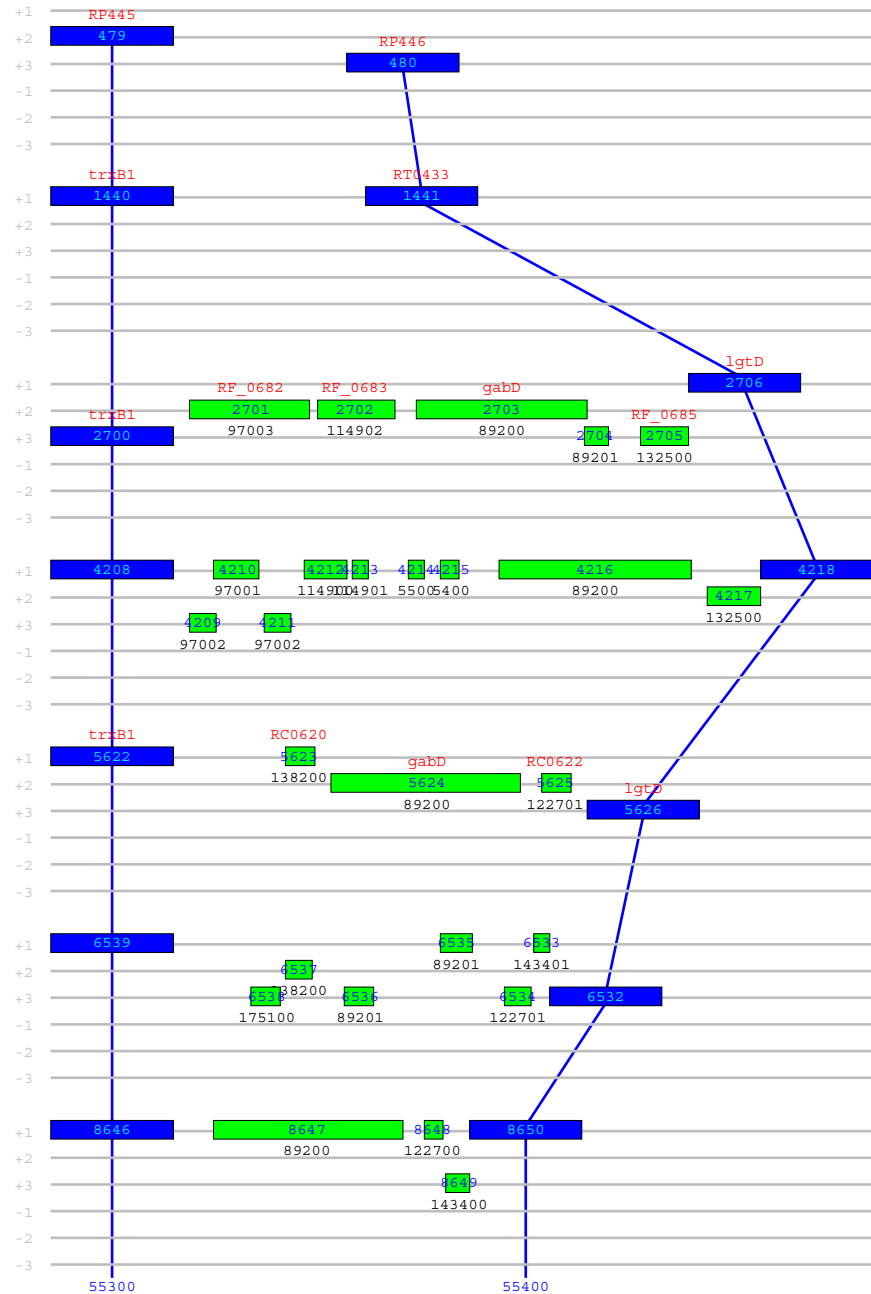



1 Rickettsia prowazekii str. Madrid E, complete genome  
 2 Rickettsia typhi str. wilmington, complete genome  
 3 Rickettsia felis URRWXCal2, complete genome  
 4 Rickettsia akari str. Hartford chromosome, whole genome shotgun sequence  
 5 Rickettsia conorii str. Malish 7, complete genome  
 6 Rickettsia sibirica 246 rsib\_agnrcr, whole genome shotgun sequence  
 7 Rickettsia rickettsii chromosome, whole genome shotgun sequence

Reg\_id: 215

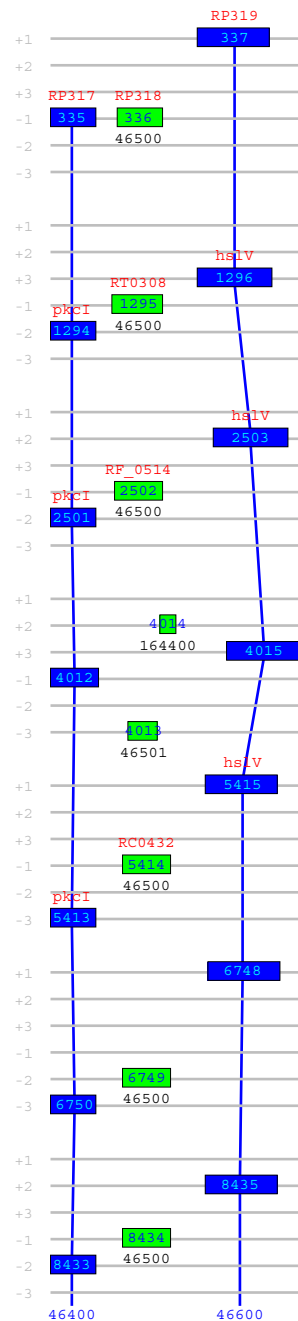

- 1 Rickettsia prowazekii str. Madrid E, complete genome
- 2 Rickettsia typhi str. wilmington, complete genome
- 3 Rickettsia felis URRWXCal2, complete genome
- 4 Rickettsia akari str. Hartford chromosome, whole genome shotgun sequence
- 5 Rickettsia conorii str. Malish 7, complete genome
- 6 Rickettsia sibirica 246 rsib\_agnrcr, whole genome shotgun sequence
- 7 Rickettsia rickettsii chromosome, whole genome shotgun sequence

Reg\_id: 217

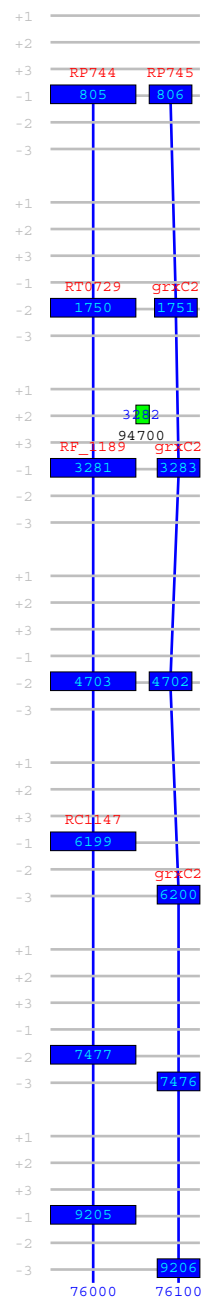

- 1 Rickettsia prowazekii str. Madrid E, complete genome
- 2 Rickettsia typhi str. wilmington, complete genome
- 3 Rickettsia felis URRWXCal2, complete genome
- 4 Rickettsia akari str. Hartford chromosome, whole genome shotgun sequence
- 5 Rickettsia conorii str. Malish 7, complete genome
- 6 Rickettsia sibirica 246 rsib\_agnrct, whole genome shotgun sequence
- 7 Rickettsia rickettsii chromosome, whole genome shotgun sequence

Reg\_id: 222

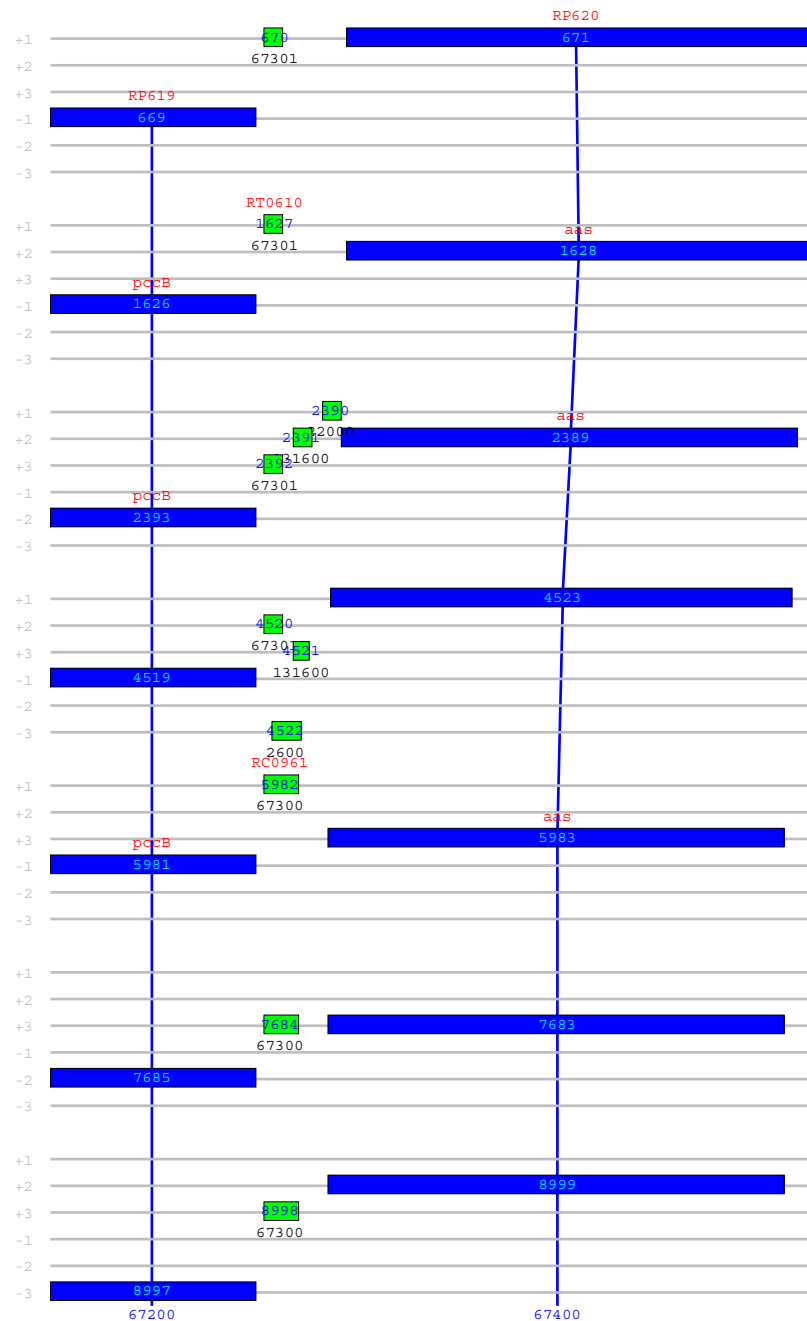

1 Rickettsia prowazekii str. Madrid E, complete genome  
 2 Rickettsia typhi str. wilmington, complete genome  
 3 Rickettsia felis URRWXCal2, complete genome  
 4 Rickettsia akarii str. Hartford chromosome, whole genome shotgun sequence  
 5 Rickettsia conorii str. Malish 7, complete genome  
 6 Rickettsia sibirica 246 rsib agncrt, whole genome shotgun sequence  
 7 Rickettsia rickettsii chromosome, whole genome shotgun sequence

Reg\_id: 224

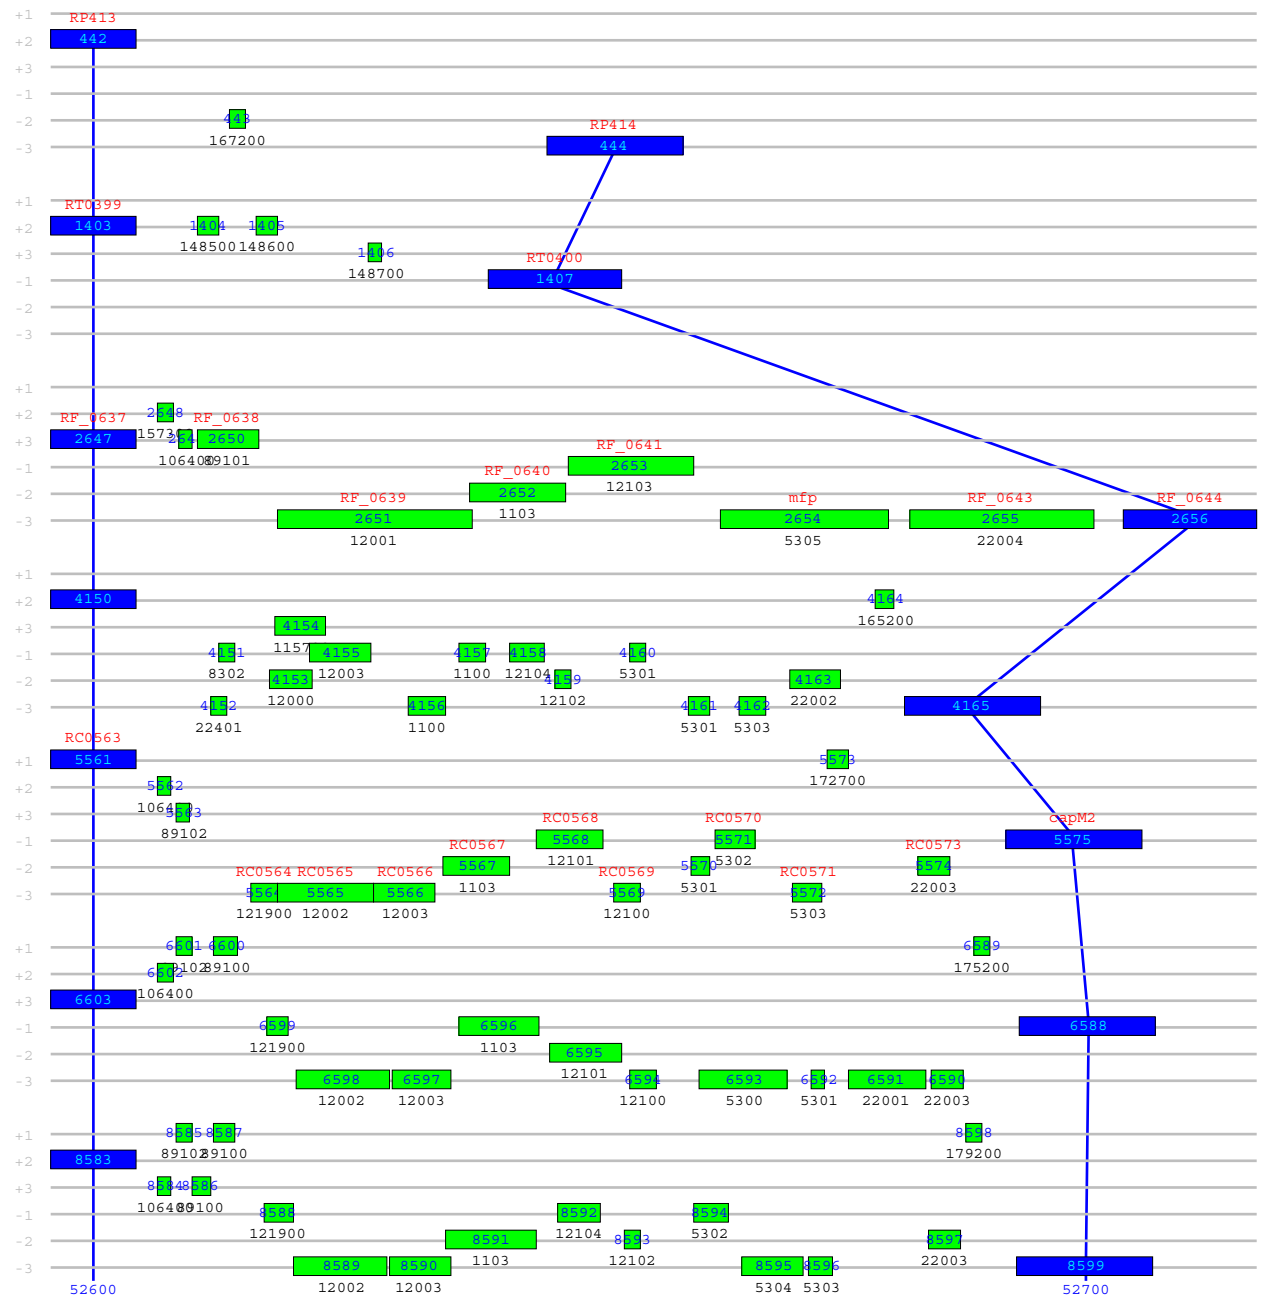

1 Rickettsia prowazekii str. Madrid E, complete genome  
 2 Rickettsia typhi str. wilmington, complete genome  
 3 Rickettsia felis URRWXCal2, complete genome  
 4 Rickettsia akari str. Hartford chromosome, whole genome shotgun sequence  
 5 Rickettsia conorii str. Malish 7, complete genome  
 6 Rickettsia sibirica 246 rsib\_agnrct, whole genome shotgun sequence  
 7 Rickettsia rickettsii chromosome, whole genome shotgun sequence

Reg\_id: 229

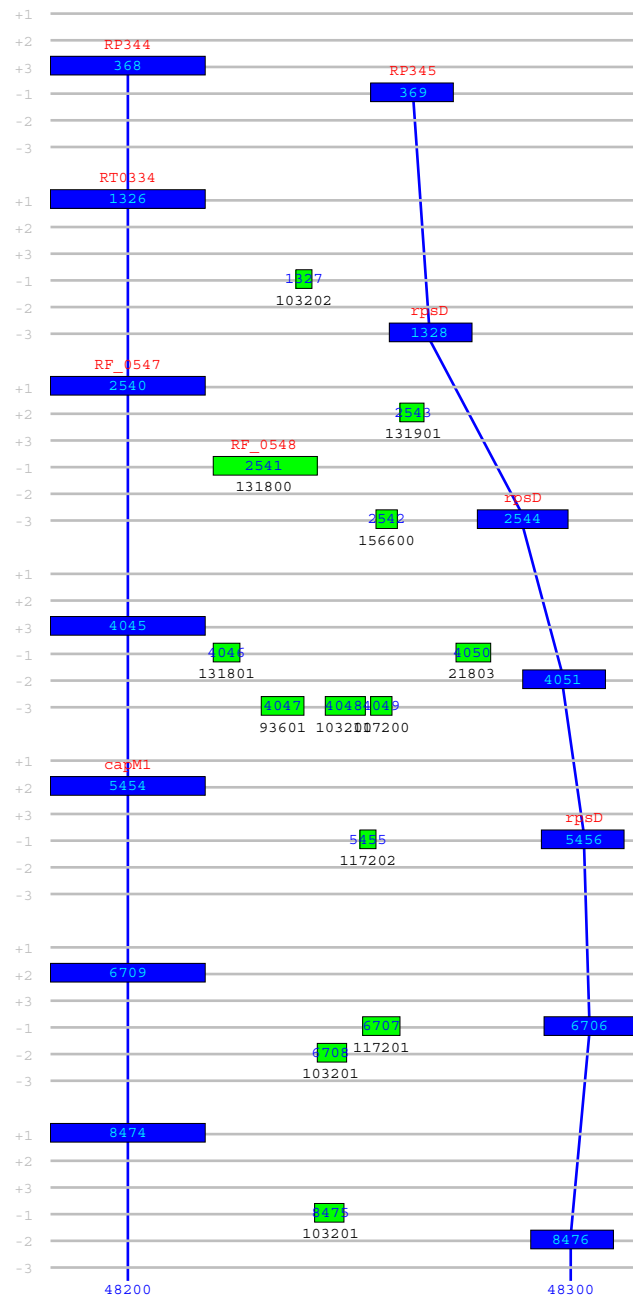

1 Rickettsia prowazekii str. Madrid E, complete genome  
 2 Rickettsia typhi str. wilmington, complete genome  
 3 Rickettsia felis URRWXCal2, complete genome  
 4 Rickettsia akari str. Hartford chromosome, whole genome shotgun sequence  
 5 Rickettsia conorii str. Malish 7, complete genome  
 6 Rickettsia sibirica 246 rsib\_agnrcr, whole genome shotgun sequence  
 7 Rickettsia rickettsii chromosome, whole genome shotgun sequence

Reg\_id: 230

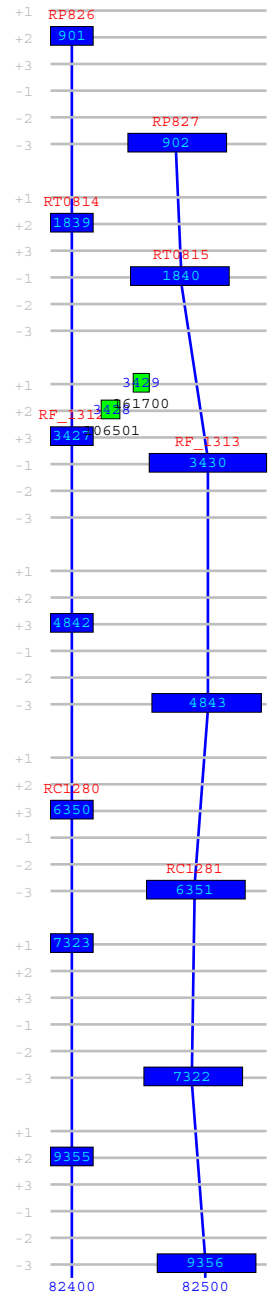

- 1 Rickettsia prowazekii str. Madrid E, complete genome
- 2 Rickettsia typhi str. wilmington, complete genome
- 3 Rickettsia felis URRWXCal2, complete genome
- 4 Rickettsia akari str. Hartford chromosome, whole genome shotgun sequence
- 5 Rickettsia conorii str. Malish 7, complete genome
- 6 Rickettsia sibirica 246 rsib\_agnrcr, whole genome shotgun sequence
- 7 Rickettsia rickettsii chromosome, whole genome shotgun sequence

Reg\_id: 231

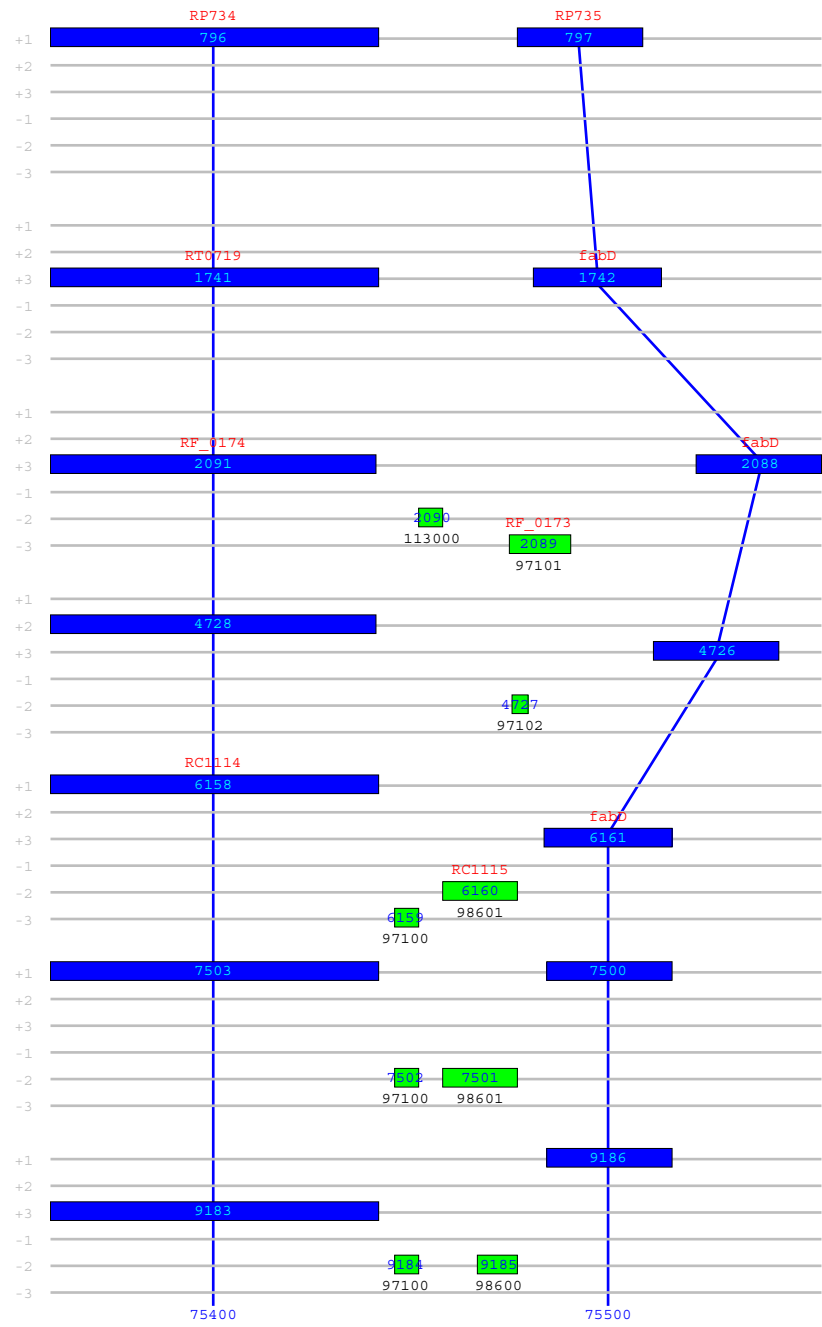





1 Rickettsia prowazekii str. Madrid E, complete genome  
 2 Rickettsia typhi str. wilmington, complete genome  
 3 Rickettsia felis URRWXCal2, complete genome  
 4 Rickettsia akari str. Hartford chromosome, whole genome shotgun sequence  
 5 Rickettsia conorii str. Malish 7, complete genome  
 6 Rickettsia sibirica 246 rsib agncrt, whole genome shotgun sequence  
 7 Rickettsia rickettsii chromosome, whole genome shotgun sequence

Reg\_id: 235

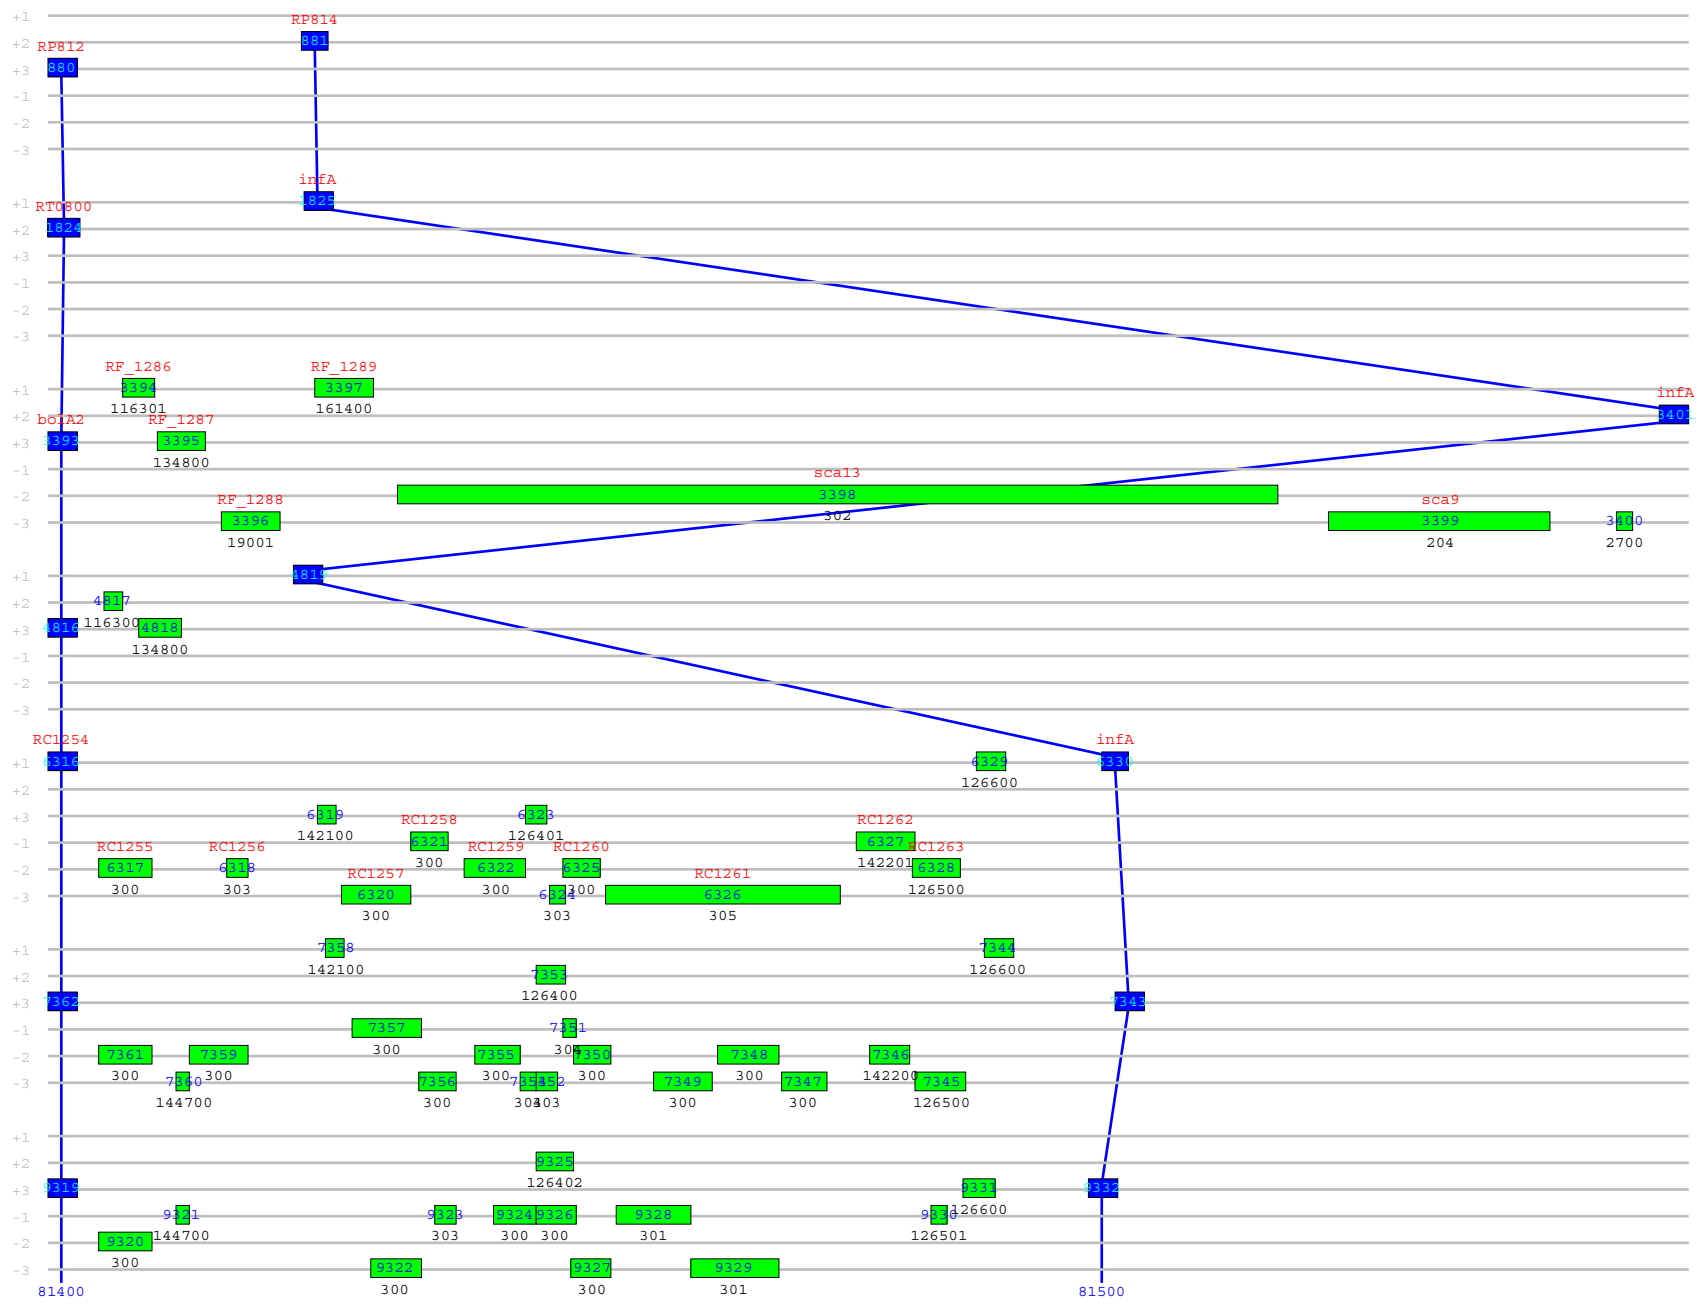

- 1 Rickettsia prowazekii str. Madrid E, complete genome
- 2 Rickettsia typhi str. wilmington, complete genome
- 3 Rickettsia felis URRWXCal2, complete genome
- 4 Rickettsia akari str. Hartford chromosome, whole genome shotgun sequence
- 5 Rickettsia conorii str. Malish 7, complete genome
- 6 Rickettsia sibirica 246 rsib\_agnrct, whole genome shotgun sequence
- 7 Rickettsia rickettsii chromosome, whole genome shotgun sequence

Reg\_id: 240

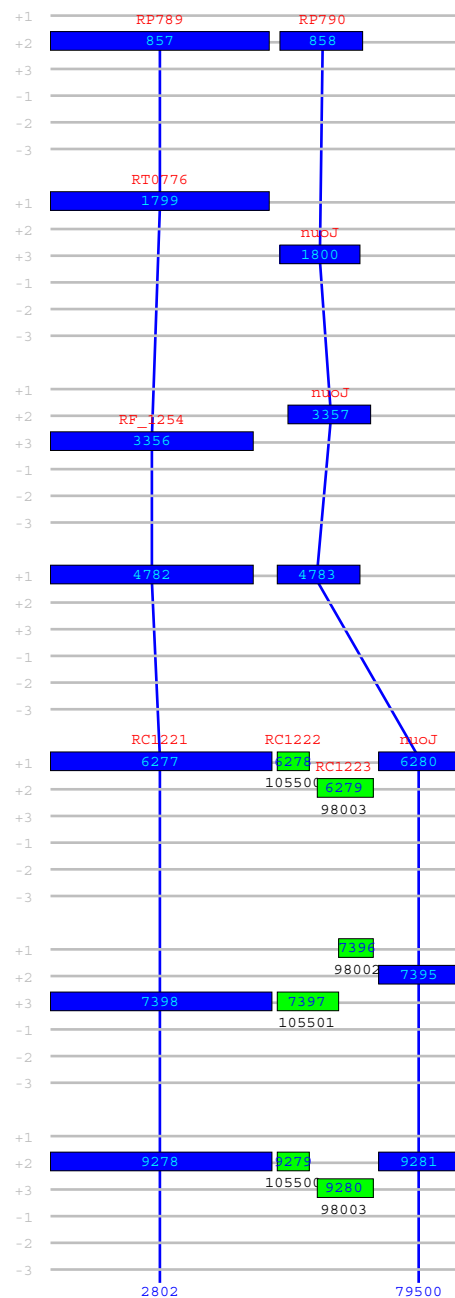





- 1 Rickettsia prowazekii str. Madrid E, complete genome
- 2 Rickettsia typhi str. wilmington, complete genome
- 3 Rickettsia felis URRWXCal2, complete genome
- 4 Rickettsia akari str. Hartford chromosome, whole genome shotgun sequence
- 5 Rickettsia conorii str. Malish 7, complete genome
- 6 Rickettsia sibirica 246 rsib\_agnrcr, whole genome shotgun sequence
- 7 Rickettsia rickettsii chromosome, whole genome shotgun sequence

Reg\_id: 246

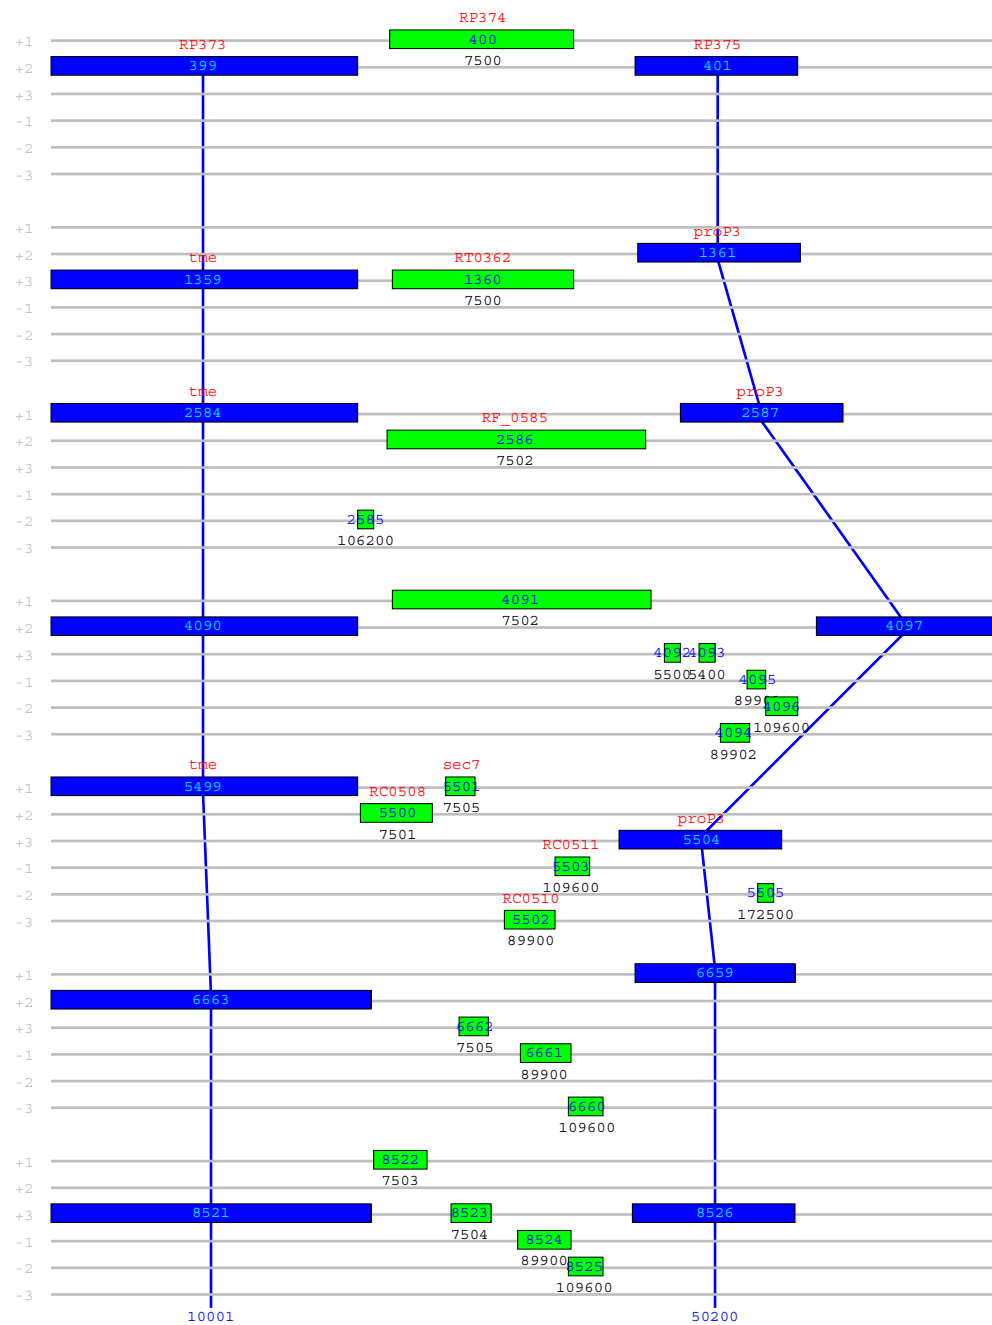

1 Rickettsia prowazekii str. Madrid E, complete genome  
 2 Rickettsia typhi str. wilmington, complete genome  
 3 Rickettsia felis URRWXCal2, complete genome  
 4 Rickettsia akari str. Hartford chromosome, whole genome shotgun sequence  
 5 Rickettsia conorii str. Malish 7, complete genome  
 6 Rickettsia sibirica 246 rsib\_agnrct, whole genome shotgun sequence  
 7 Rickettsia rickettsii chromosome, whole genome shotgun sequence

Reg\_id: 247

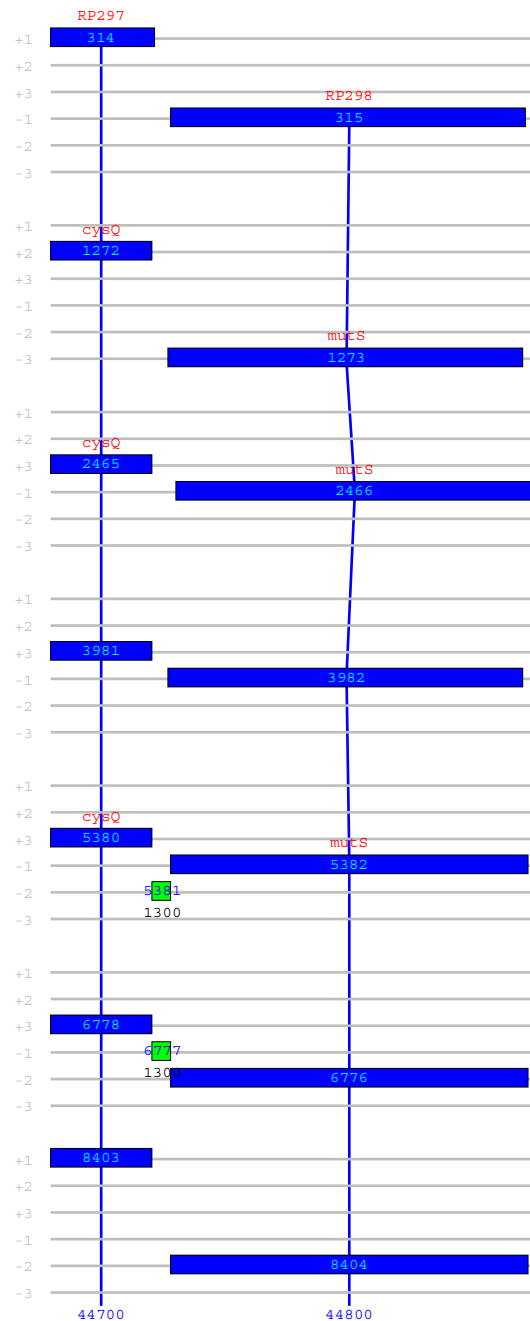

1 Rickettsia prowazekii str. Madrid E, complete genome  
 2 Rickettsia typhi str. wilmington, complete genome  
 3 Rickettsia felis URRWXCal2, complete genome  
 4 Rickettsia akari str. Hartford chromosome, whole genome shotgun sequence  
 5 Rickettsia conorii str. Malish 7, complete genome  
 6 Rickettsia sibirica 246 rsib\_agnrct, whole genome shotgun sequence  
 7 Rickettsia rickettsii chromosome, whole genome shotgun sequence

Reg\_id: 248

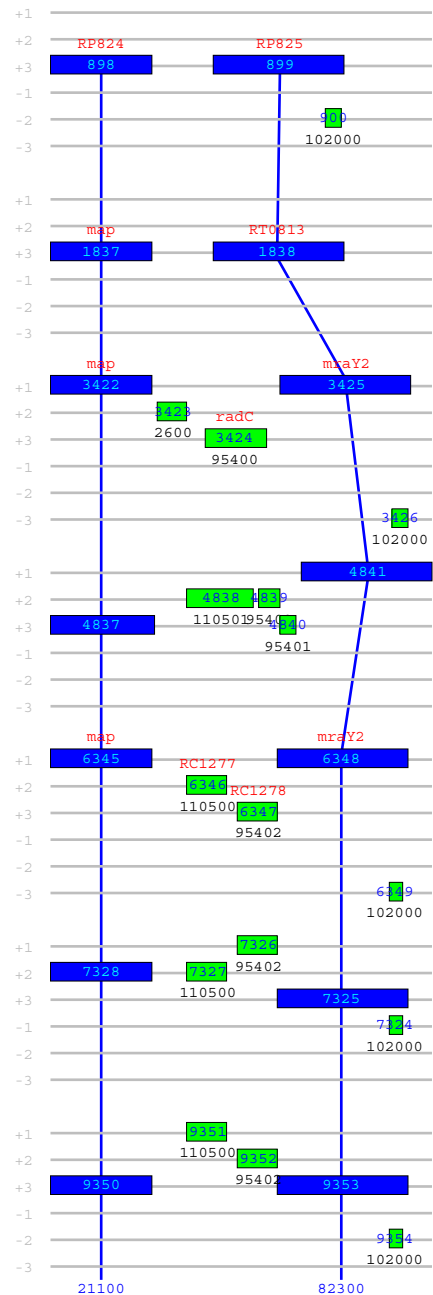





1 Rickettsia prowazekii str. Madrid E, complete genome  
 2 Rickettsia typhi str. wilmington, complete genome  
 3 Rickettsia felis URRWXCal2, complete genome  
 4 Rickettsia akari str. Hartford chromosome, whole genome shotgun sequence  
 5 Rickettsia conorii str. Malish 7, complete genome  
 6 Rickettsia sibirica 246 rsib\_agnrct, whole genome shotgun sequence  
 7 Rickettsia rickettsii chromosome, whole genome shotgun sequence

Reg\_id: 250

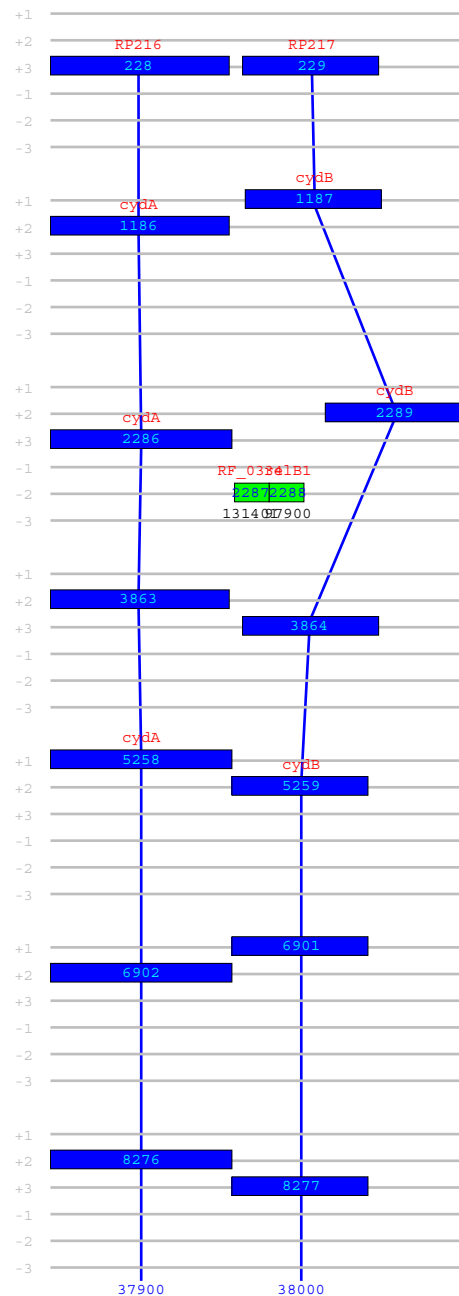

1 Rickettsia prowazekii str. Madrid E, complete genome  
 2 Rickettsia typhi str. wilmington, complete genome  
 3 Rickettsia felis URRWXCal2, complete genome  
 4 Rickettsia akari str. Hartford chromosome, whole genome shotgun sequence  
 5 Rickettsia conorii str. Malish 7, complete genome  
 6 Rickettsia sibirica 246 rsib\_agnrcr, whole genome shotgun sequence  
 7 Rickettsia rickettsii chromosome, whole genome shotgun sequence

Reg\_id: 251

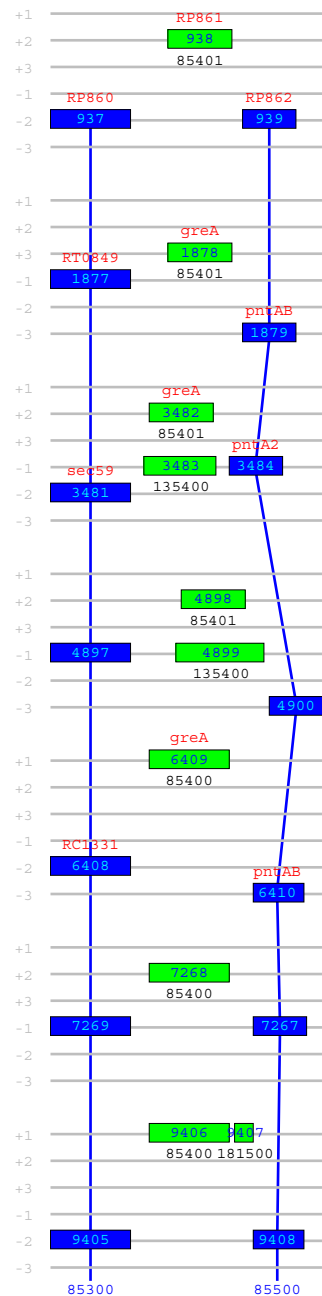

- 1 Rickettsia prowazekii str. Madrid E, complete genome
- 2 Rickettsia typhi str. wilmington, complete genome
- 3 Rickettsia felis URRWXCal2, complete genome
- 4 Rickettsia akari str. Hartford chromosome, whole genome shotgun sequence
- 5 Rickettsia conorii str. Malish 7, complete genome
- 6 Rickettsia sibirica 246 rsib\_agnrcr, whole genome shotgun sequence
- 7 Rickettsia rickettsii chromosome, whole genome shotgun sequence

Reg\_id: 252

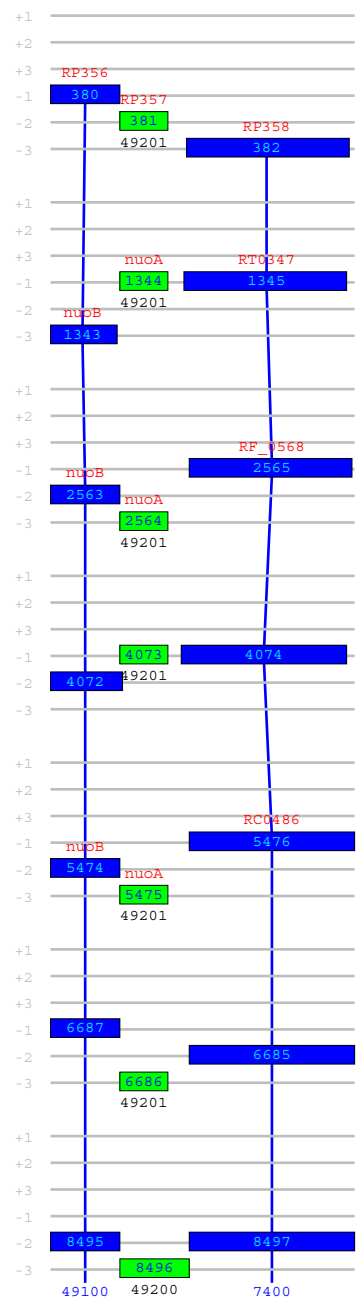

1 Rickettsia prowazekii str. Madrid E, complete genome  
 2 Rickettsia typhi str. wilmington, complete genome  
 3 Rickettsia felis URRWXCal2, complete genome  
 4 Rickettsia akari str. Hartford chromosome, whole genome shotgun sequence  
 5 Rickettsia conorii str. Malish 7, complete genome  
 6 Rickettsia sibirica 246 rsib\_agnrcr, whole genome shotgun sequence  
 7 Rickettsia rickettsii chromosome, whole genome shotgun sequence

Reg\_id: 256

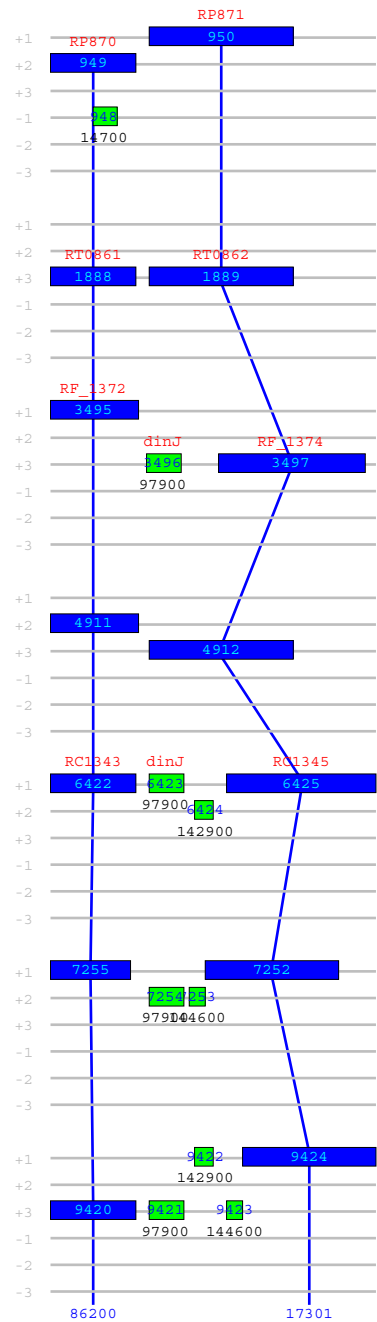

1 Rickettsia prowazekii str. Madrid E, complete genome  
 2 Rickettsia typhi str. wilmington, complete genome  
 3 Rickettsia felis URRWXCal2, complete genome  
 4 Rickettsia akari str. Hartford chromosome, whole genome shotgun sequence  
 5 Rickettsia conorii str. Malish 7, complete genome  
 6 Rickettsia sibirica 246 rsib\_agnrt, whole genome shotgun sequence  
 7 Rickettsia rickettsii chromosome, whole genome shotgun sequence

Reg\_id: 257

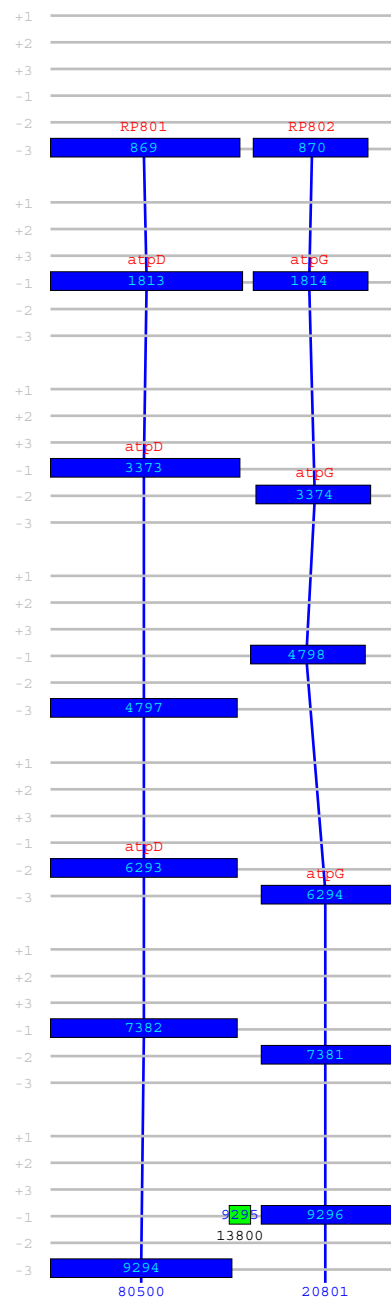

1 Rickettsia prowazekii str. Madrid E, complete genome  
 2 Rickettsia typhi str. wilmington, complete genome  
 3 Rickettsia felis URRWXCal2, complete genome  
 4 Rickettsia akari str. Hartford chromosome, whole genome shotgun sequence  
 5 Rickettsia conorii str. Malish 7, complete genome  
 6 Rickettsia sibirica 246 rsib\_agnrcr, whole genome shotgun sequence  
 7 Rickettsia rickettsii chromosome, whole genome shotgun sequence

Reg\_id: 258

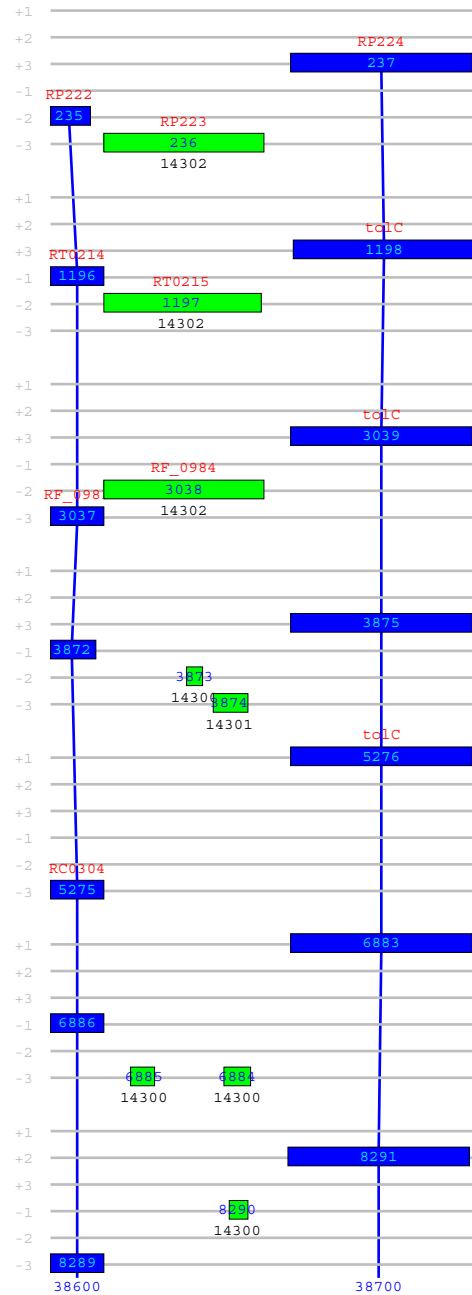

1 Rickettsia prowazekii str. Madrid E, complete genome  
 2 Rickettsia typhi str. wilmington, complete genome  
 3 Rickettsia felis URRWXCal2, complete genome  
 4 Rickettsia akari str. Hartford chromosome, whole genome shotgun sequence  
 5 Rickettsia conorii str. Malish 7, complete genome  
 6 Rickettsia sibirica 246 rsib\_agnrcr, whole genome shotgun sequence  
 7 Rickettsia rickettsii chromosome, whole genome shotgun sequence

Reg\_id: 262

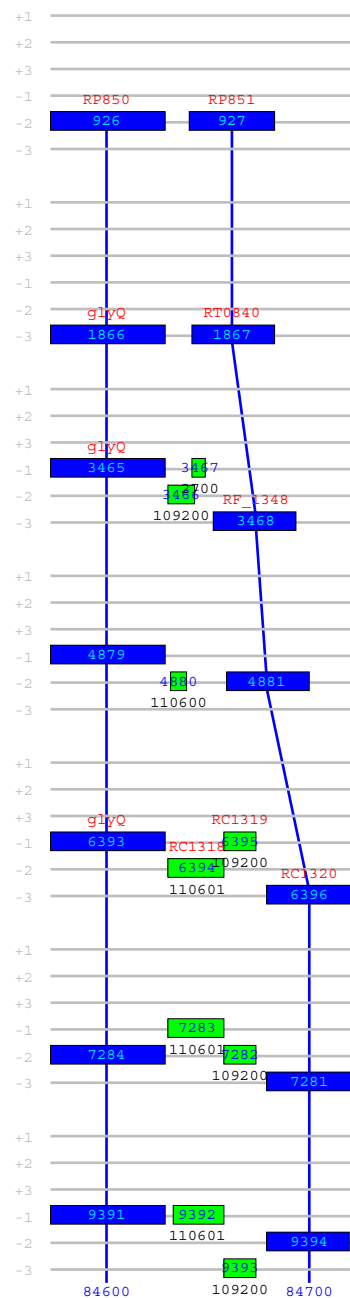

- 1 Rickettsia prowazekii str. Madrid E, complete genome
- 2 Rickettsia typhi str. wilmington, complete genome
- 3 Rickettsia felis URRWXCal2, complete genome
- 4 Rickettsia akari str. Hartford chromosome, whole genome shotgun sequence
- 5 Rickettsia conorii str. Malish 7, complete genome
- 6 Rickettsia sibirica 246 rsib\_agnrcr, whole genome shotgun sequence
- 7 Rickettsia rickettsii chromosome, whole genome shotgun sequence

Reg\_id: 263

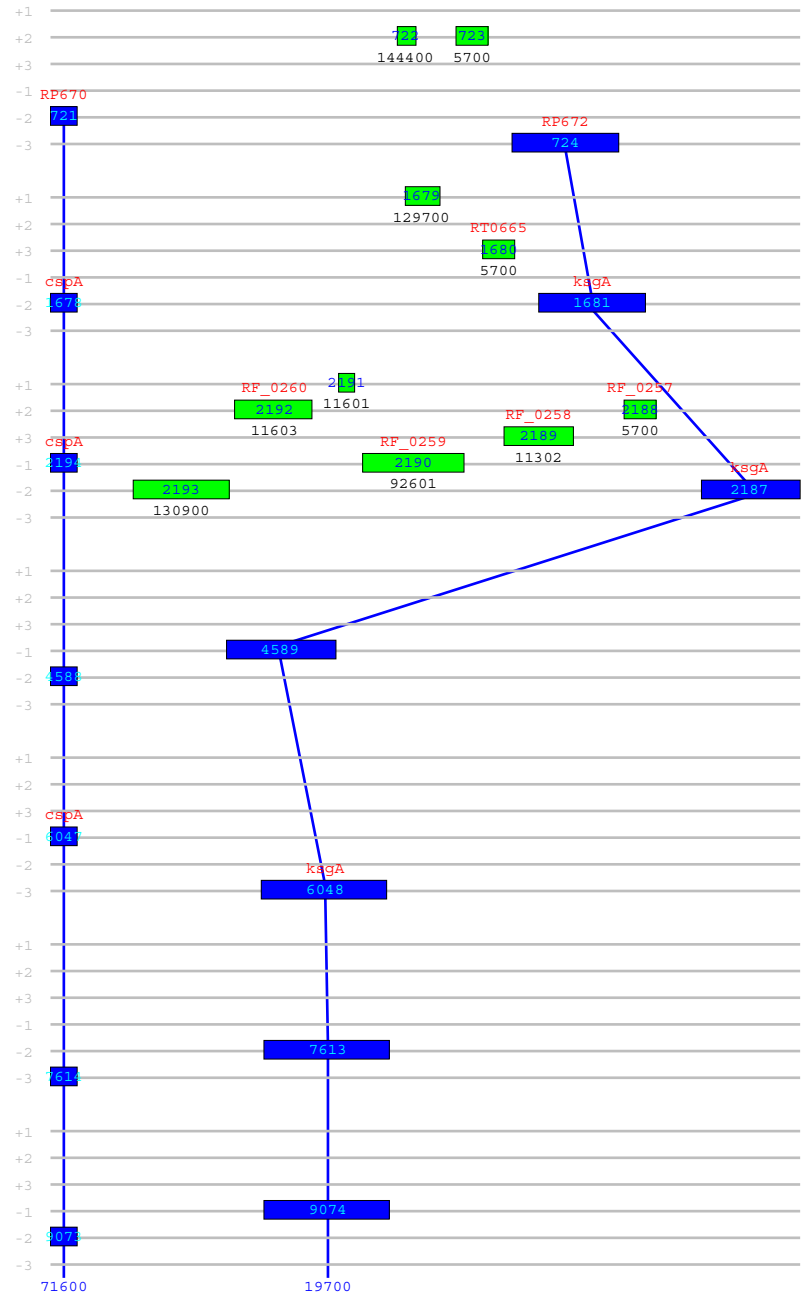



- 1 Rickettsia prowazekii str. Madrid E, complete genome
- 2 Rickettsia typhi str. wilmington, complete genome
- 3 Rickettsia felis URRWXCal2, complete genome
- 4 Rickettsia akari str. Hartford chromosome, whole genome shotgun sequence
- 5 Rickettsia conorii str. Malish 7, complete genome
- 6 Rickettsia sibirica 246 rsib\_agnrcr, whole genome shotgun sequence
- 7 Rickettsia rickettsii chromosome, whole genome shotgun sequence

Reg\_id: 264

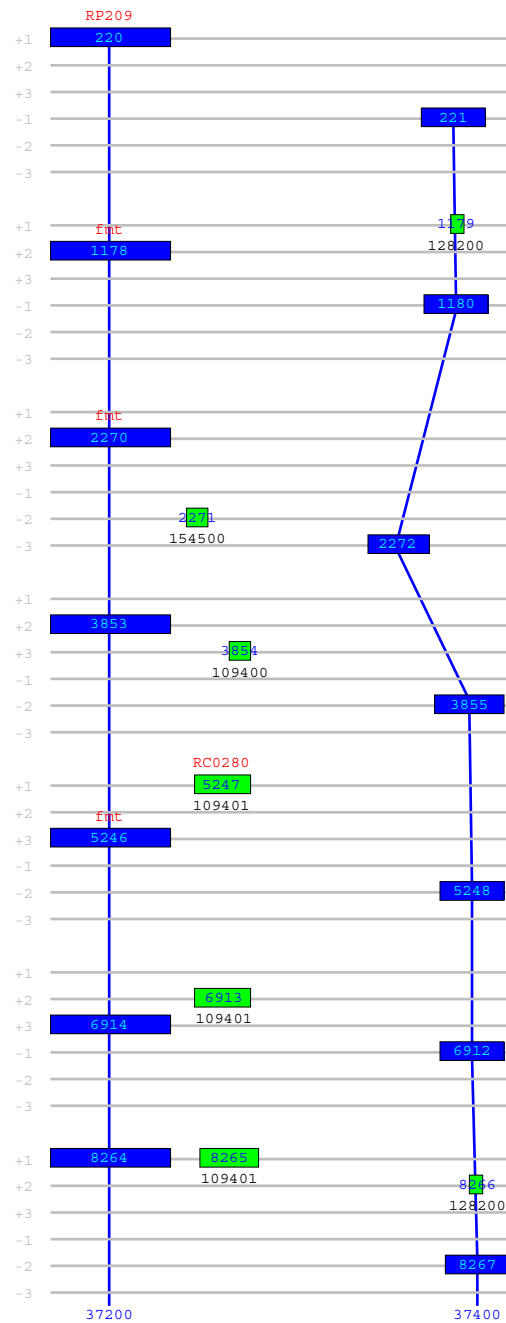

1 Rickettsia prowazekii str. Madrid E, complete genome  
 2 Rickettsia typhi str. wilmington, complete genome  
 3 Rickettsia felis URRWXCal2, complete genome  
 4 Rickettsia akari str. Hartford chromosome, whole genome shotgun sequence  
 5 Rickettsia conorii str. Malish 7, complete genome  
 6 Rickettsia sibirica 246 rsib\_agnrcr, whole genome shotgun sequence  
 7 Rickettsia rickettsii chromosome, whole genome shotgun sequence

Reg\_id: 265

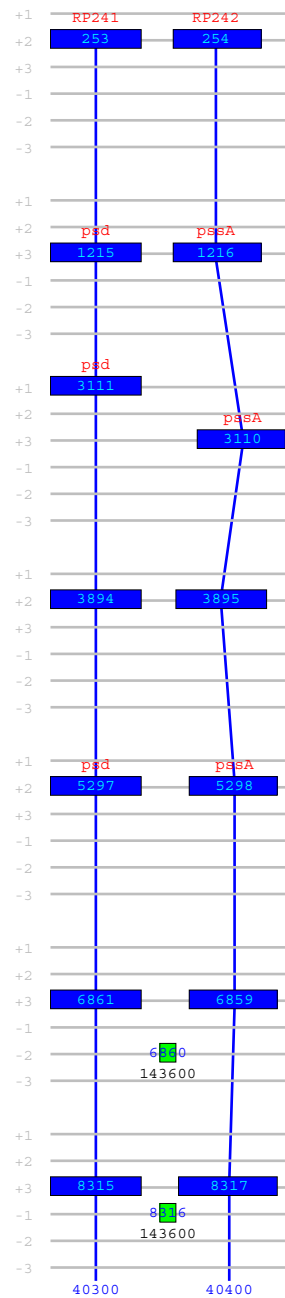

1 Rickettsia prowazekii str. Madrid E, complete genome  
 2 Rickettsia typhi str. wilmington, complete genome  
 3 Rickettsia felis URRWXCal2, complete genome  
 4 Rickettsia akari str. Hartford chromosome, whole genome shotgun sequence  
 5 Rickettsia conorii str. Malish 7, complete genome  
 6 Rickettsia sibirica 246 rsib\_agnrct, whole genome shotgun sequence  
 7 Rickettsia rickettsii chromosome, whole genome shotgun sequence

Reg\_id: 266

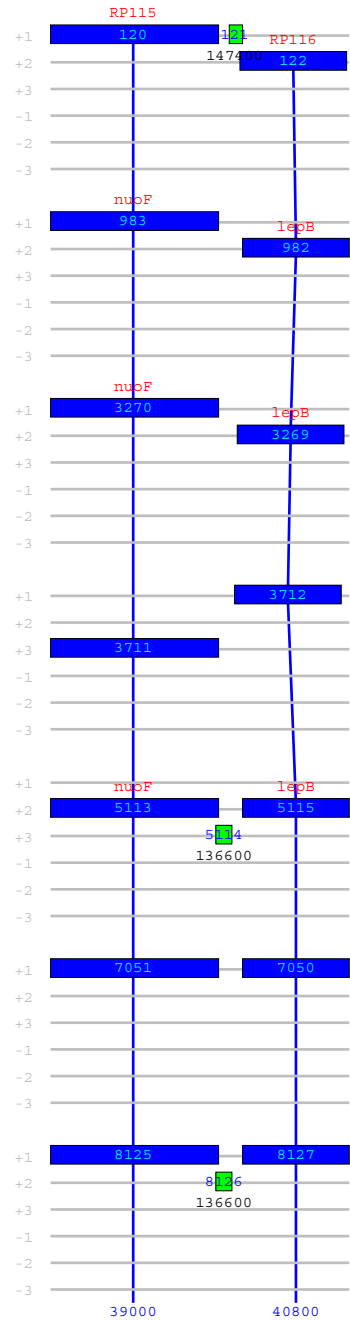

2 Rickettsia prowazekii str. Madrid E, complete genome  
 2 Rickettsia typhi str. wilmington, complete genome  
 3 Rickettsia felis URRWXCal2, complete genome  
 4 Rickettsia akari str. Hartford chromosome, whole genome shotgun sequence  
 5 Rickettsia conorii str. Malish 7, complete genome  
 6 Rickettsia sibirica 246 rsib\_agnrct, whole genome shotgun sequence  
 7 Rickettsia rickettsii chromosome, whole genome shotgun sequence

Reg\_id: 267

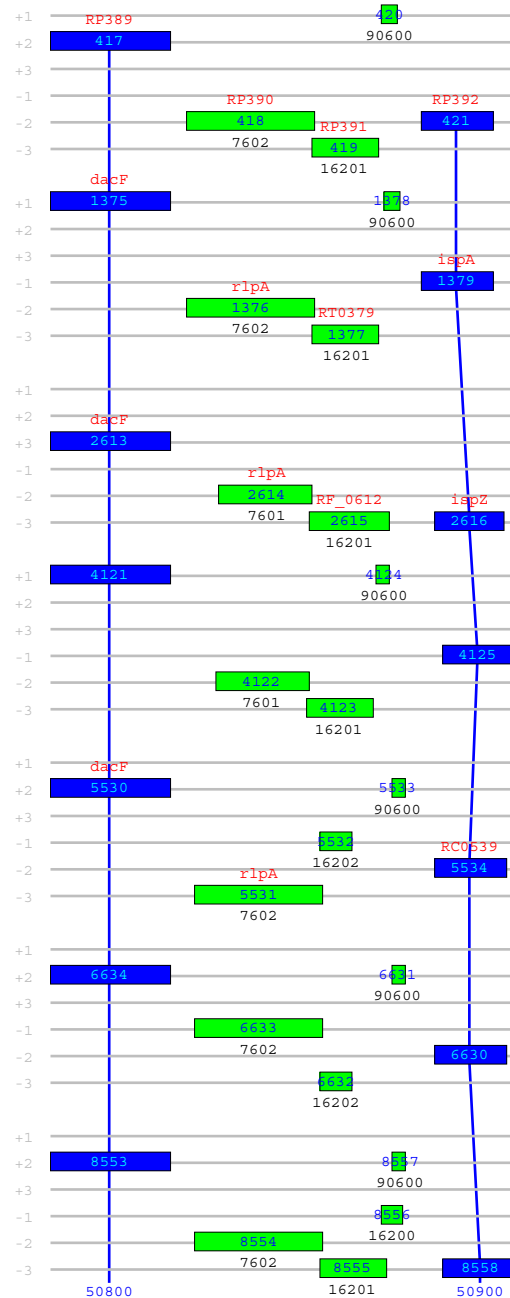

1 Rickettsia prowazekii str. Madrid E, complete genome  
 2 Rickettsia typhi str. wilmington, complete genome  
 3 Rickettsia felis URRWXCa12, complete genome  
 4 Rickettsia akari str. Hartford chromosome, whole genome shotgun sequence  
 5 Rickettsia conorii str. Malish 7, complete genome  
 6 Rickettsia sibirica 246 rsib\_agnrct, whole genome shotgun sequence  
 7 Rickettsia rickettsii chromosome, whole genome shotgun sequence

Reg\_id: 268

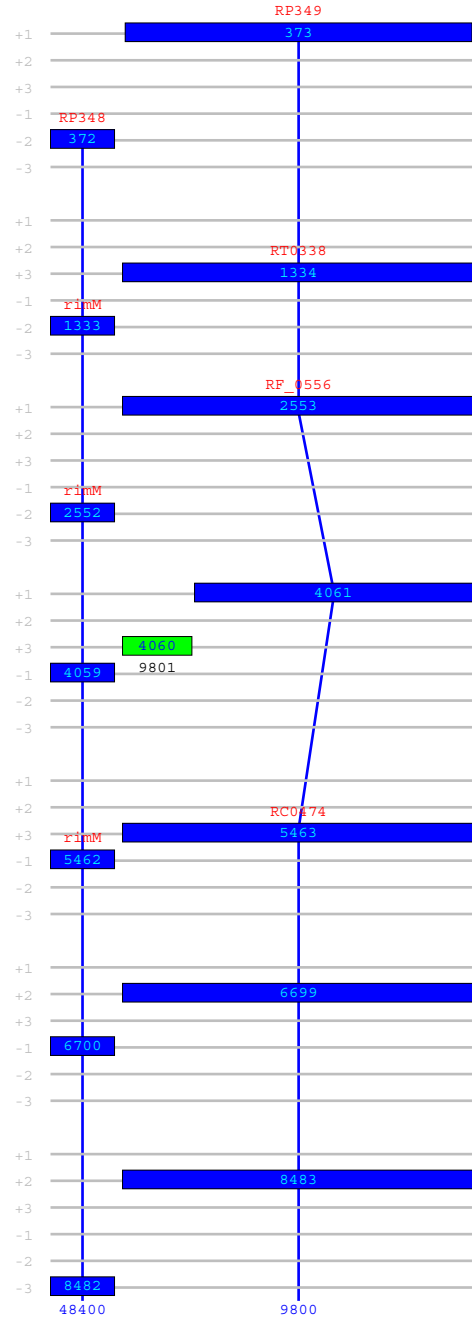

1 Rickettsia prowazekii str. Madrid E, complete genome  
 2 Rickettsia typhi str. wilmington, complete genome  
 3 Rickettsia felis URRWXCal2, complete genome  
 4 Rickettsia akari str. Hartford chromosome, whole genome shotgun sequence  
 5 Rickettsia conorii str. Malish 7, complete genome  
 6 Rickettsia sibirica 246 rsib\_agnrct, whole genome shotgun sequence  
 7 Rickettsia rickettsii chromosome, whole genome shotgun sequence

Reg\_id: 274

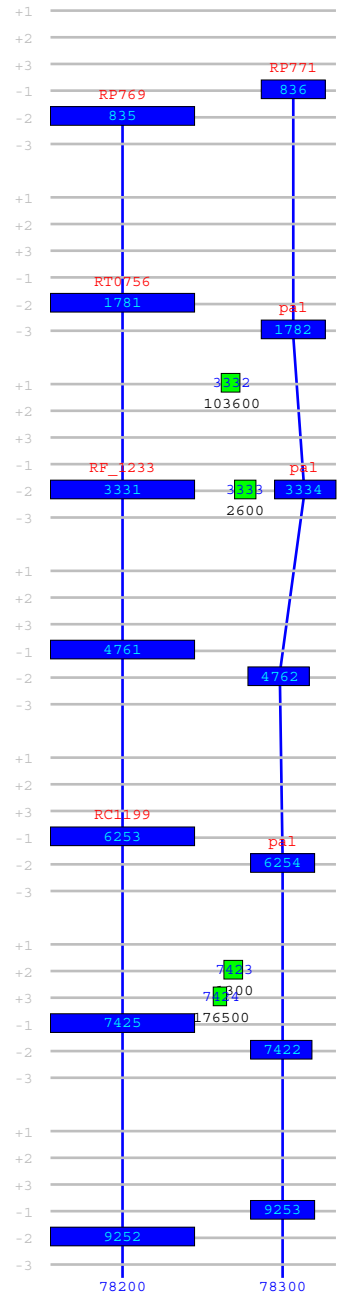

1 Rickettsia prowazekii str. Madrid E, complete genome  
 2 Rickettsia typhi str. wilmington, complete genome  
 3 Rickettsia felis URRWXCal2, complete genome  
 4 Rickettsia akari str. Hartford chromosome, whole genome shotgun sequence  
 5 Rickettsia conorii str. Malish 7, complete genome  
 6 Rickettsia sibirica 246 rsib\_agnrcr, whole genome shotgun sequence  
 7 Rickettsia rickettsii chromosome, whole genome shotgun sequence

Reg\_id: 276

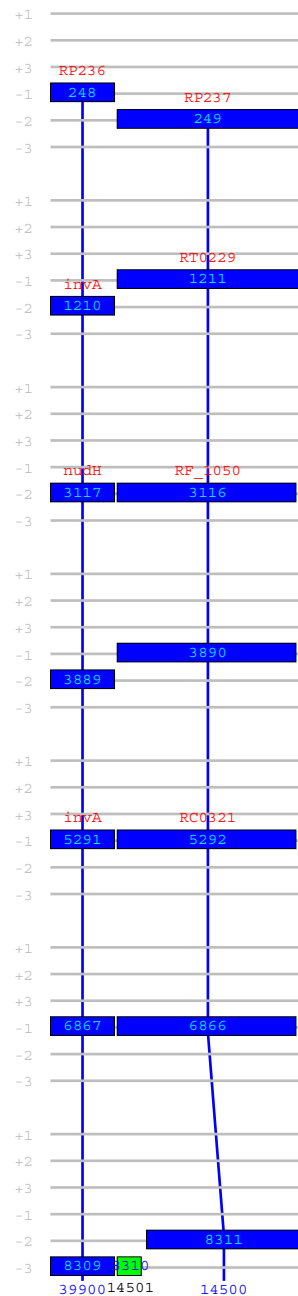

- 1 Rickettsia prowazekii str. Madrid E, complete genome
- 2 Rickettsia typhi str. wilmington, complete genome
- 3 Rickettsia felis URRWXCal2, complete genome
- 4 Rickettsia akari str. Hartford chromosome, whole genome shotgun sequence
- 5 Rickettsia conorii str. Malish 7, complete genome
- 6 Rickettsia sibirica 246 rsib\_agnrct, whole genome shotgun sequence
- 7 Rickettsia rickettsii chromosome, whole genome shotgun sequence

Reg\_id: 278

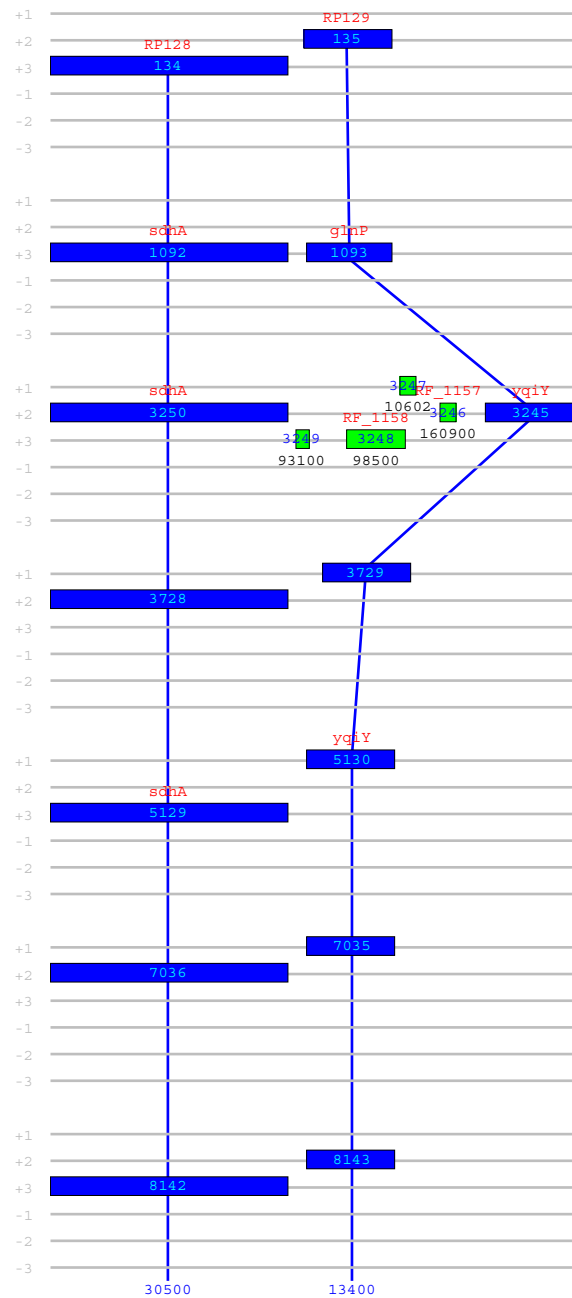



1 Rickettsia prowazekii str. Madrid E, complete genome  
 2 Rickettsia typhi str. wilmington, complete genome  
 3 Rickettsia felis URRWXCal2, complete genome  
 4 Rickettsia akari str. Hartford chromosome, whole genome shotgun sequence  
 5 Rickettsia conorii str. Malish 7, complete genome  
 6 Rickettsia sibirica 246 rsib\_agnrcr, whole genome shotgun sequence  
 7 Rickettsia rickettsii chromosome, whole genome shotgun sequence

Reg\_id: 280

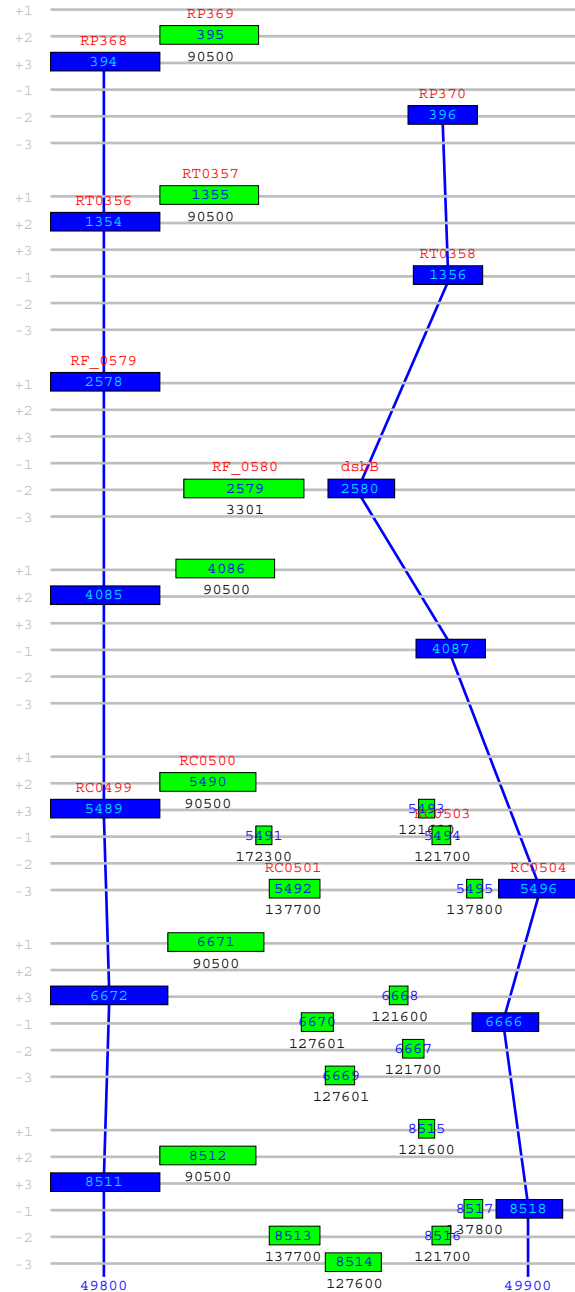

- 1 Rickettsia prowazekii str. Madrid E, complete genome
- 2 Rickettsia typhi str. wilmington, complete genome
- 3 Rickettsia felis URRWXCal2, complete genome
- 4 Rickettsia akari str. Hartford chromosome, whole genome shotgun sequence
- 5 Rickettsia conorii str. Malish 7, complete genome
- 6 Rickettsia sibirica 246 rsib\_agnrcr, whole genome shotgun sequence
- 7 Rickettsia rickettsii chromosome, whole genome shotgun sequence

Reg\_id: 283

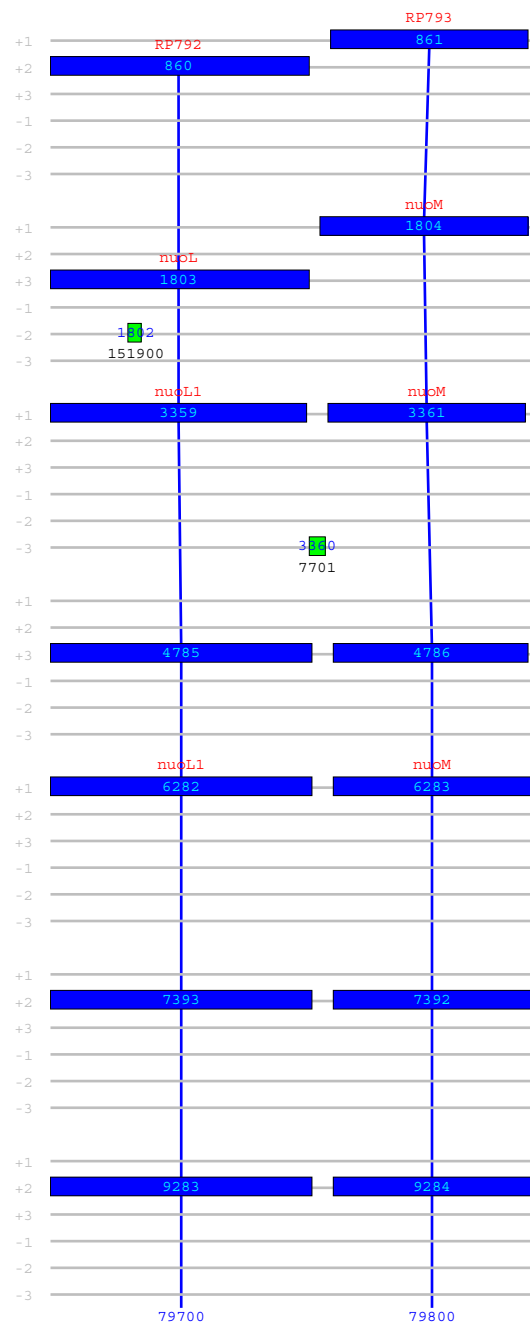

1 Rickettsia prowazekii str. Madrid E, complete genome  
 2 Rickettsia typhi str. wilmington, complete genome  
 3 Rickettsia felis URRWXCal2, complete genome  
 4 Rickettsia akari str. Hartford chromosome, whole genome shotgun sequence  
 5 Rickettsia conorii str. Malish 7, complete genome  
 6 Rickettsia sibirica 246 rsib\_agnrcr, whole genome shotgun sequence  
 7 Rickettsia rickettsii chromosome, whole genome shotgun sequence

Reg\_id: 287

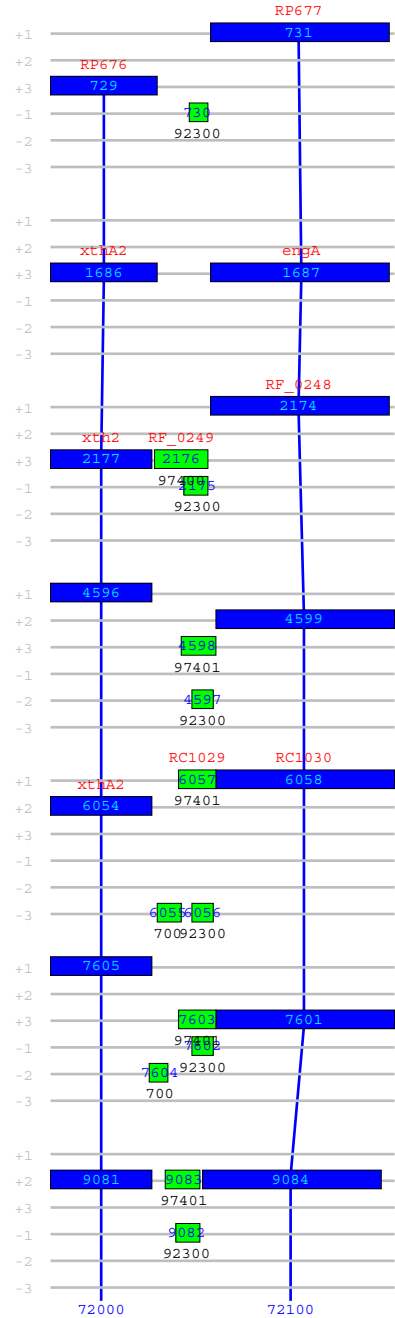

1 Rickettsia prowazekii str. Madrid E, complete genome  
 2 Rickettsia typhi str wilmington, complete genome  
 3 Rickettsia felis URRWXCal2, complete genome  
 4 Rickettsia akari str. Hartford chromosome, whole genome shotgun sequence  
 5 Rickettsia conorii str. Malish 7, complete genome  
 6 Rickettsia sibirica 246 rsib\_agnrcr, whole genome shotgun sequence  
 7 Rickettsia rickettsii chromosome, whole genome shotgun sequence

Reg\_id: 289

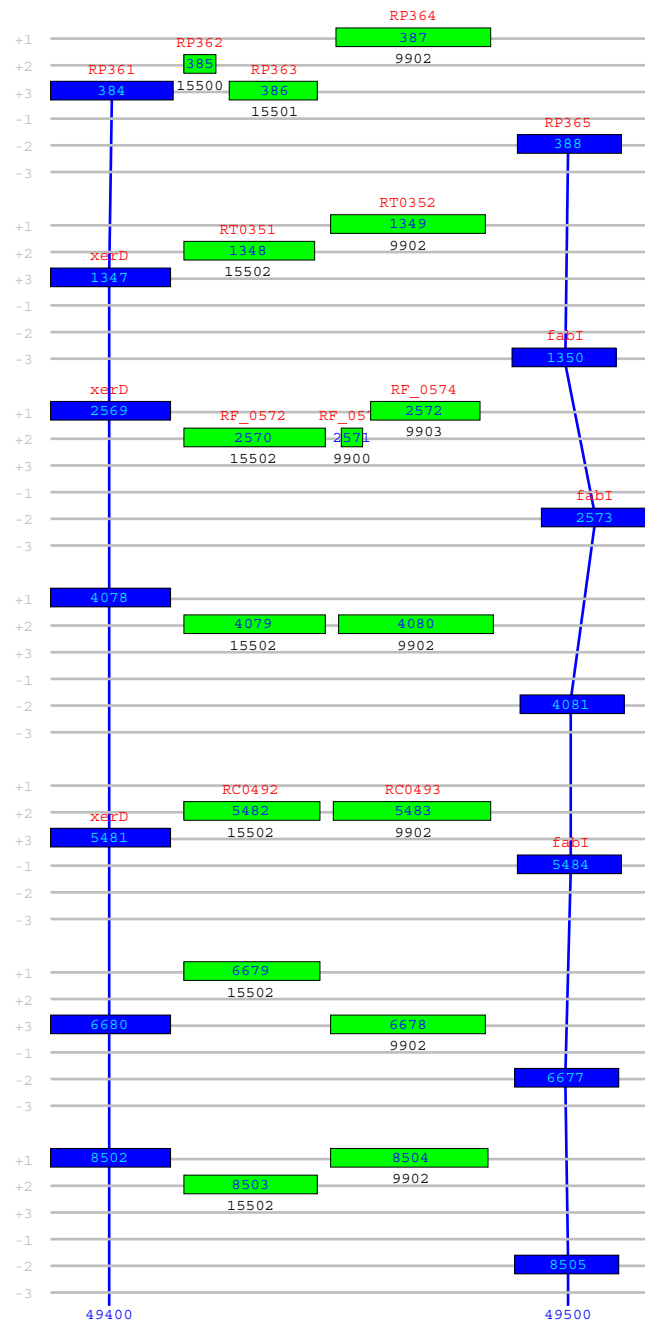

1 Rickettsia prowazekii str. Madrid E, complete genome  
 2 Rickettsia typhi str. wilmington, complete genome  
 3 Rickettsia felis URRWXCal2, complete genome  
 4 Rickettsia akari str. Hartford chromosome, whole genome shotgun sequence  
 5 Rickettsia conorii str. Malish 7, complete genome  
 6 Rickettsia sibirica 246 rsib\_agnrcr, whole genome shotgun sequence  
 7 Rickettsia rickettsii chromosome, whole genome shotgun sequence

Reg\_id: 291

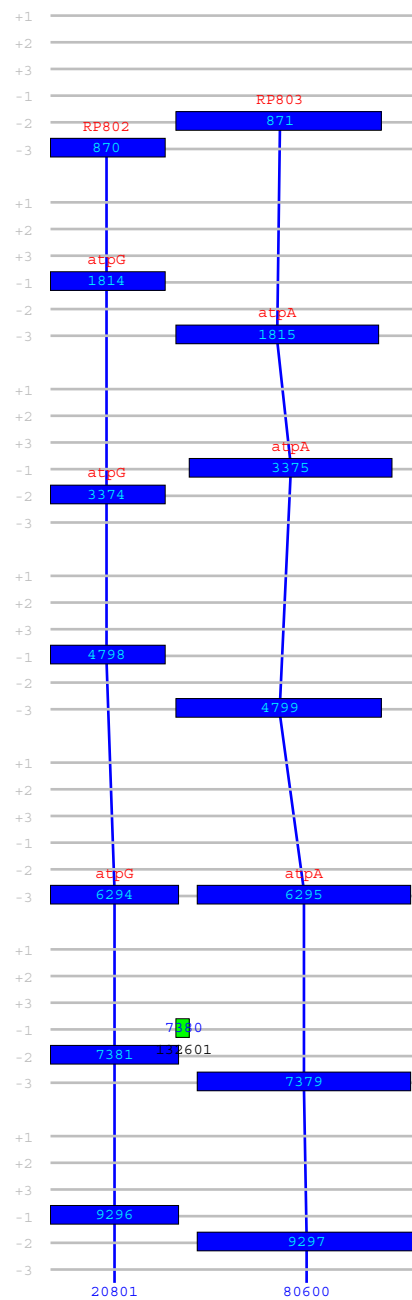

1 Rickettsia prowazekii str. Madrid E, complete genome  
 2 Rickettsia typhi str. wilmington, complete genome  
 3 Rickettsia felis URRWXCal2, complete genome  
 4 Rickettsia akari str. Hartford chromosome, whole genome shotgun sequence  
 5 Rickettsia conorii str. Malish 7, complete genome  
 6 Rickettsia sibirica 246 rsib\_agnrcr, whole genome shotgun sequence  
 7 Rickettsia rickettsii chromosome, whole genome shotgun sequence

Reg\_id: 292

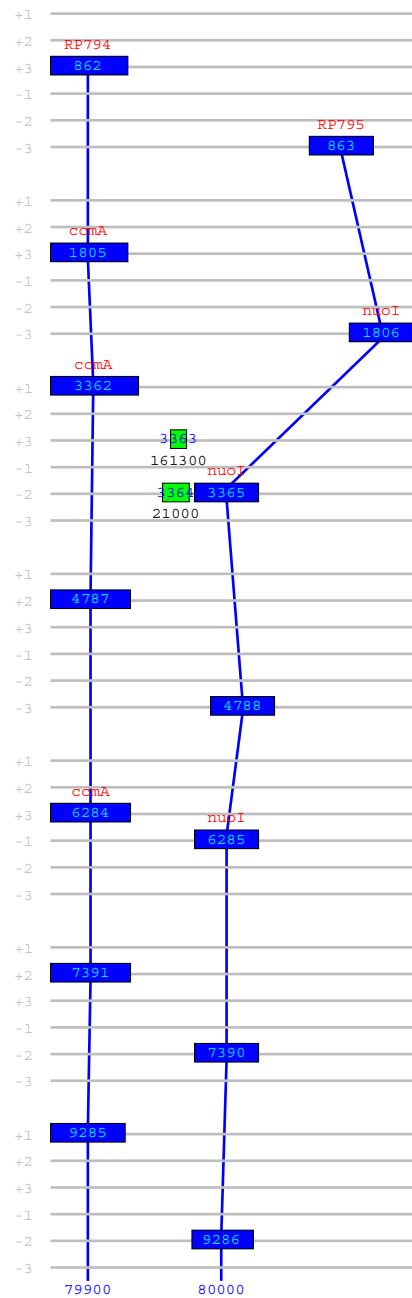

1 Rickettsia prowazekii str. Madrid E, complete genome  
 2 Rickettsia typhi str. wilmington, complete genome  
 3 Rickettsia felis URRWXCal2, complete genome  
 4 Rickettsia akari str. Hartford chromosome, whole genome shotgun sequence  
 5 Rickettsia conorii str. Malish 7, complete genome  
 6 Rickettsia sibirica 246 rsib\_agnrcr, whole genome shotgun sequence  
 7 Rickettsia rickettsii chromosome, whole genome shotgun sequence

Reg\_id: 294

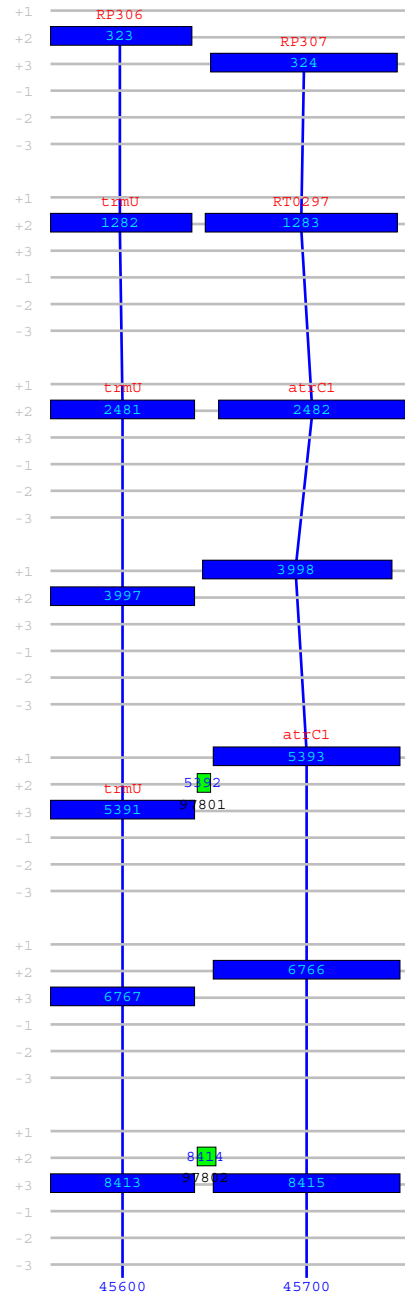

- 1 Rickettsia prowazekii str. Madrid E, complete genome
- 2 Rickettsia typhi str. wilmington, complete genome
- 3 Rickettsia felis URRWXCal2, complete genome
- 4 Rickettsia akari str. Hartford chromosome, whole genome shotgun sequence
- 5 Rickettsia conorii str. Malish 7, complete genome
- 6 Rickettsia sibirica 246 rsib\_agnrct, whole genome shotgun sequence
- 7 Rickettsia rickettsii chromosome, whole genome shotgun sequence

Reg\_id: 299

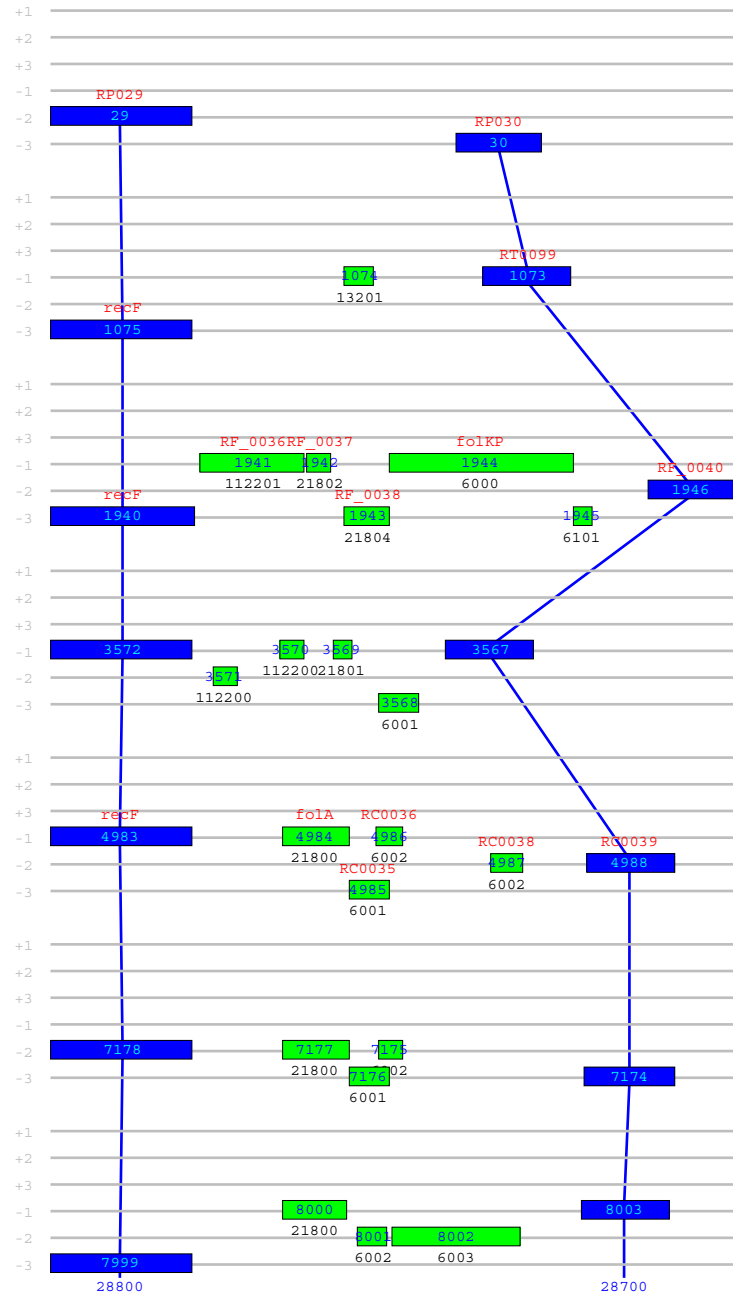



- 1 Rickettsia prowazekii str. Madrid E, complete genome
- 2 Rickettsia typhi str. wilmington, complete genome
- 3 Rickettsia felis URRWXCal2, complete genome
- 4 Rickettsia akari str. Hartford chromosome, whole genome shotgun sequence
- 5 Rickettsia conorii str. Malish 7, complete genome
- 6 Rickettsia sibirica 246 rsib\_agnrcr, whole genome shotgun sequence
- 7 Rickettsia rickettsii chromosome, whole genome shotgun sequence

Reg\_id: 301

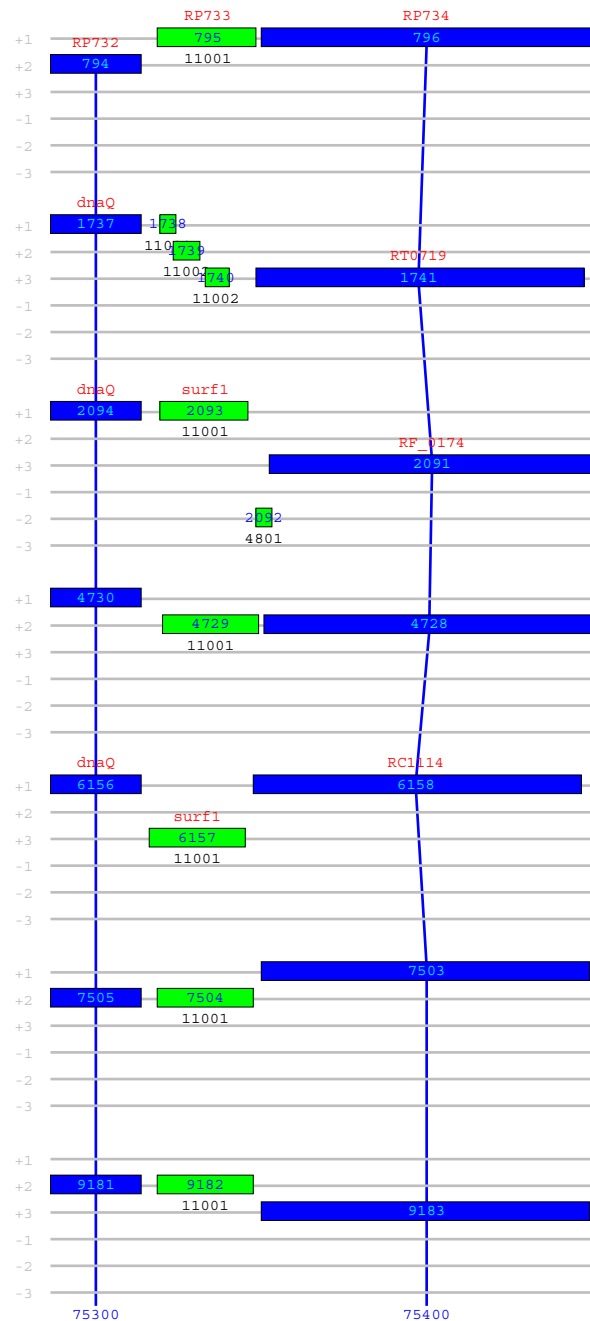

- 1 Rickettsia prowazekii str. Madrid E, complete genome
- 2 Rickettsia typhi str. wilmington, complete genome
- 3 Rickettsia felis URRWXCal2, complete genome
- 4 Rickettsia akari str. Hartford chromosome, whole genome shotgun sequence
- 5 Rickettsia conorii str. Malish 7, complete genome
- 6 Rickettsia sibirica 246 rsib\_agnrcrt, whole genome shotgun sequence
- 7 Rickettsia rickettsii chromosome, whole genome shotgun sequence

Reg\_id: 302

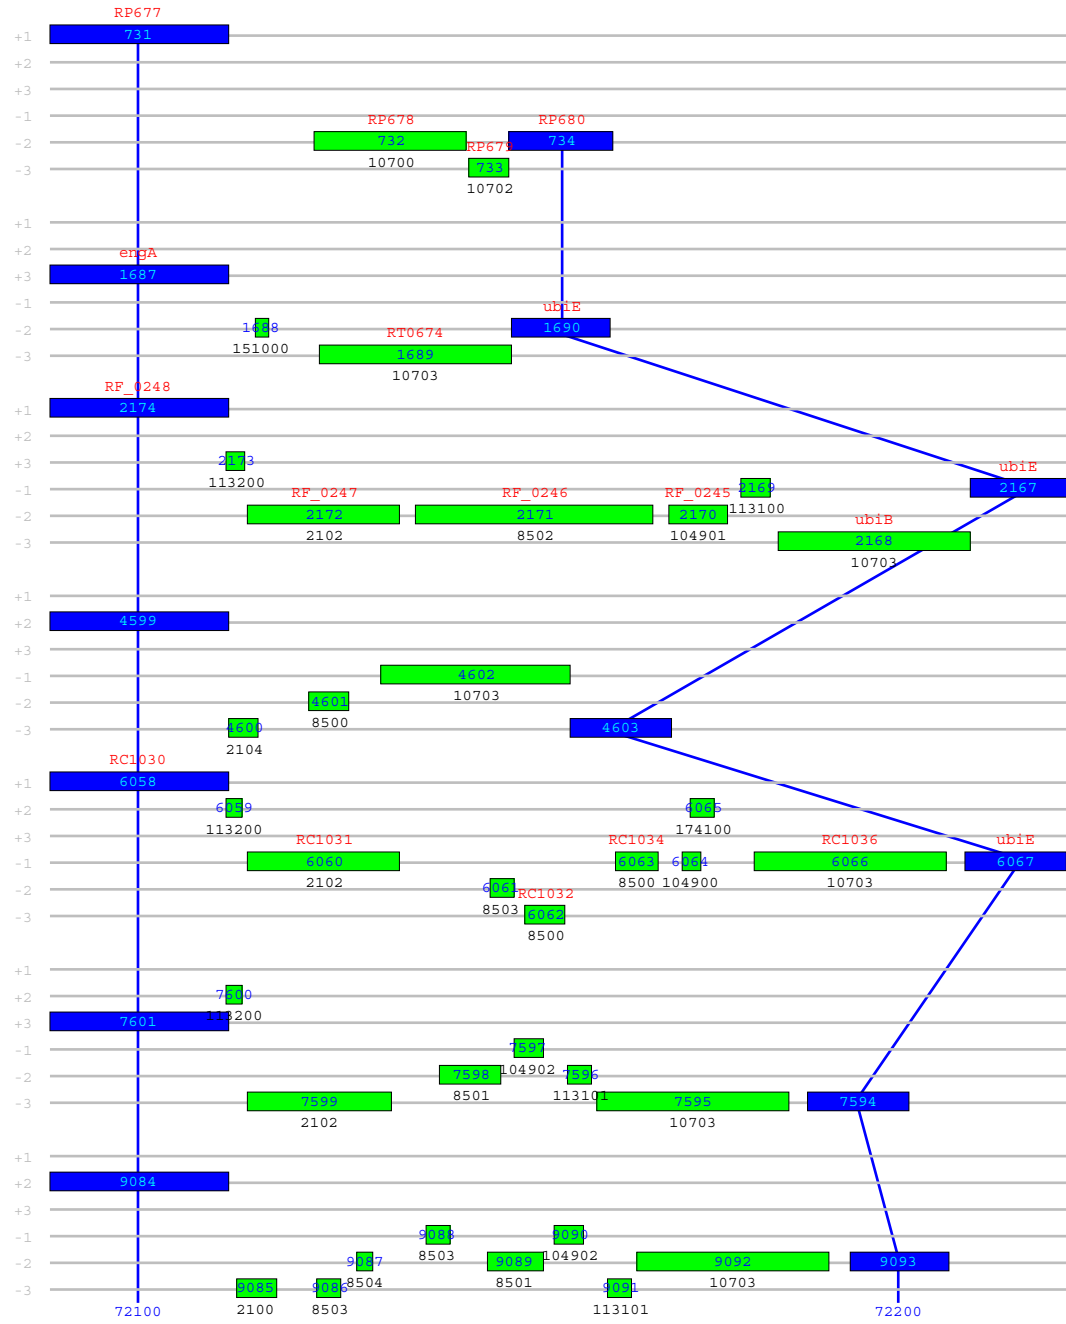



- 1 Rickettsia prowazekii str. Madrid E, complete genome
- 2 Rickettsia typhi str. wilmington, complete genome
- 3 Rickettsia felis URRWXCal2, complete genome
- 4 Rickettsia akari str. Hartford chromosome, whole genome shotgun sequence
- 5 Rickettsia conorii str. Malish 7, complete genome
- 6 Rickettsia sibirica 246 rsib\_agnrct, whole genome shotgun sequence
- 7 Rickettsia rickettsii chromosome, whole genome shotgun sequence

Reg\_id: 304

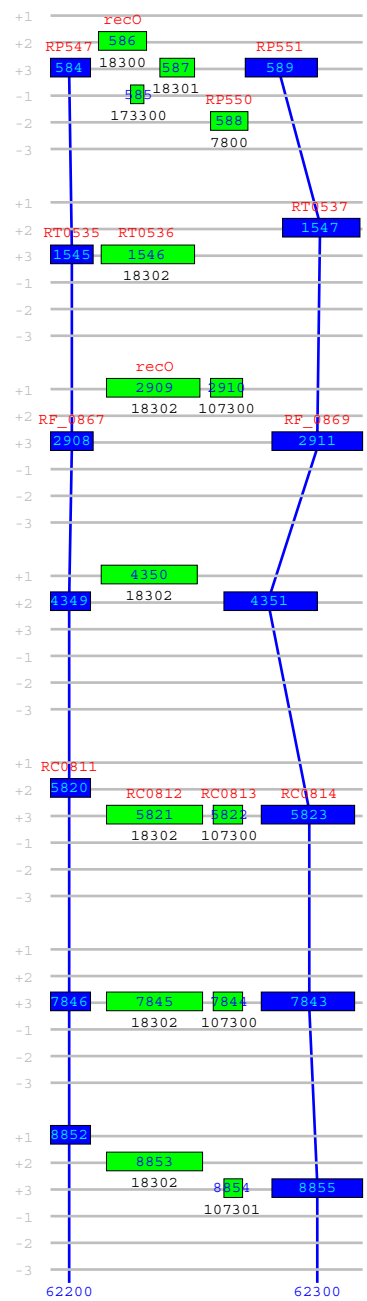

1 Rickettsia prowazekii str. Madrid E, complete genome  
 2 Rickettsia typhi str. wilmington, complete genome  
 3 Rickettsia felis URRWXCal2, complete genome  
 4 Rickettsia akari str. Hartford chromosome, whole genome shotgun sequence  
 5 Rickettsia conorii str. Malish 7, complete genome  
 6 Rickettsia sibirica 246 rsib\_agnrcr, whole genome shotgun sequence  
 7 Rickettsia rickettsii chromosome, whole genome shotgun sequence

Reg\_id: 307

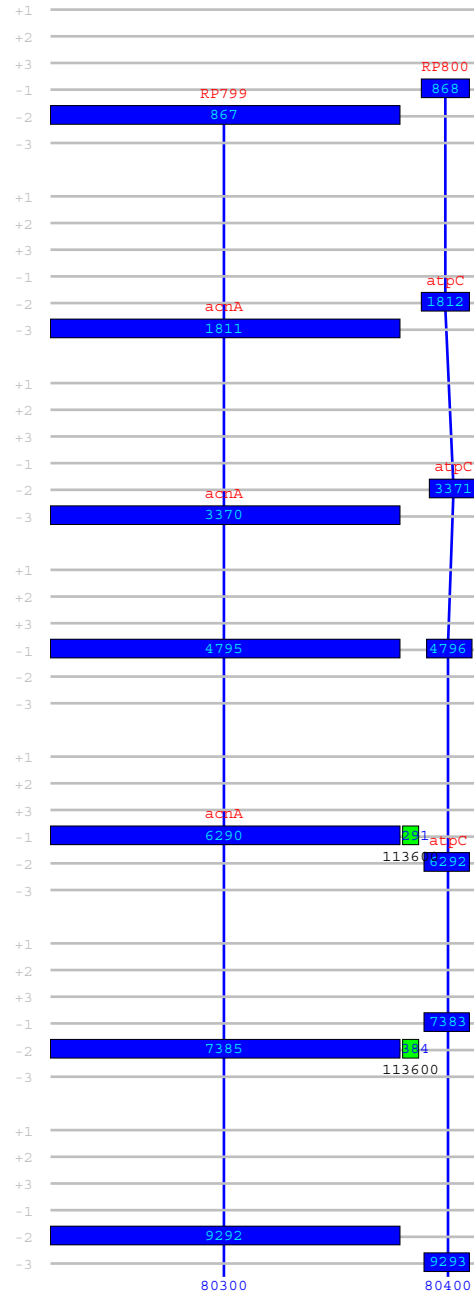

1 Rickettsia prowazekii str. Madrid E, complete genome  
 2 Rickettsia typhi str. wilmington, complete genome  
 3 Rickettsia felis URRWXCal2, complete genome  
 4 Rickettsia akari str. Hartford chromosome, whole genome shotgun sequence  
 5 Rickettsia conorii str. Malish 7, complete genome  
 6 Rickettsia sibirica 246 rsib\_agnrcr, whole genome shotgun sequence  
 7 Rickettsia rickettsii chromosome, whole genome shotgun sequence

Reg\_id: 308

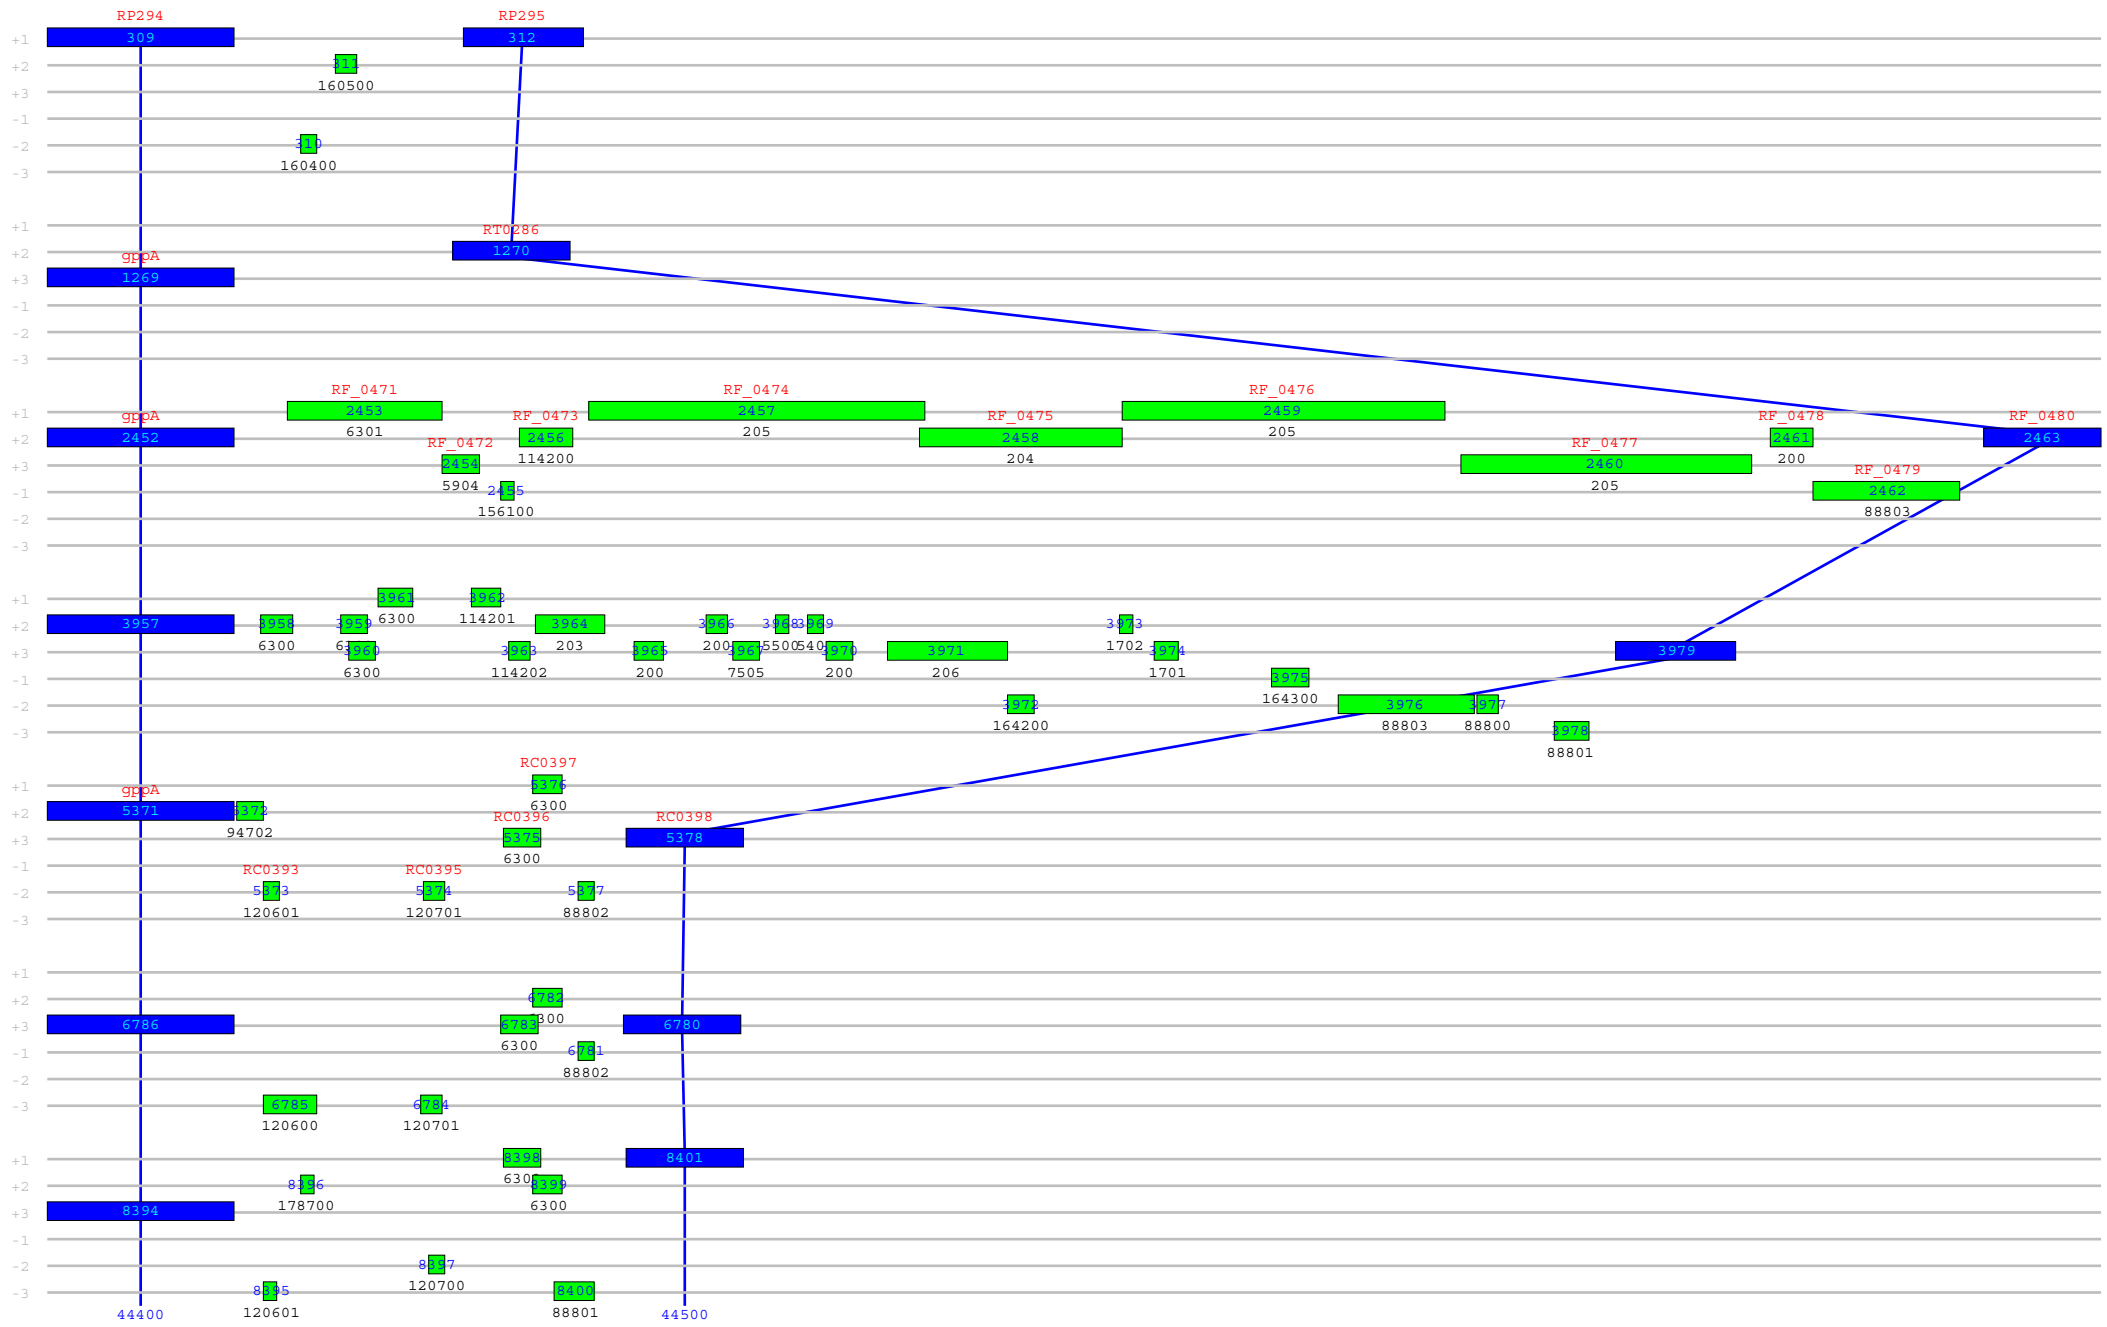

- 1 Rickettsia prowazekii str. Madrid E, complete genome
- 2 Rickettsia typhi str. wilmington, complete genome
- 3 Rickettsia felis URRWXCa2, complete genome
- 4 Rickettsia akari str. Hartford chromosome, whole genome shotgun sequence
- 5 Rickettsia conorii str. Malish 7, complete genome
- 6 Rickettsia sibirica 246 rsib\_agnrt, whole genome shotgun sequence
- 7 Rickettsia rickettsii chromosome, whole genome shotgun sequence

Reg\_id: 310

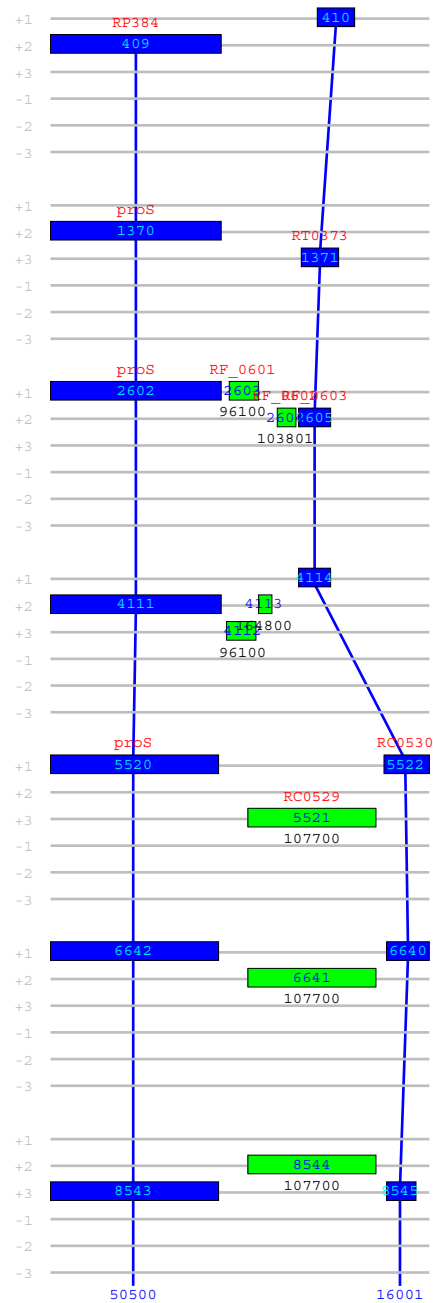

- 1 Rickettsia prowazekii str. Madrid E, complete genome
- 2 Rickettsia typhi str. wilmington, complete genome
- 3 Rickettsia felis URRWXCAl2, complete genome
- 4 Rickettsia akari str. Hartford chromosome, whole genome shotgun sequence
- 5 Rickettsia conorii str. Malish 7, complete genome
- 6 Rickettsia sibirica 246 rsib agncrt, whole genome shotgun sequence
- 7 Rickettsia rickettsii chromosome, whole genome shotgun sequence

Reg\_id: 314

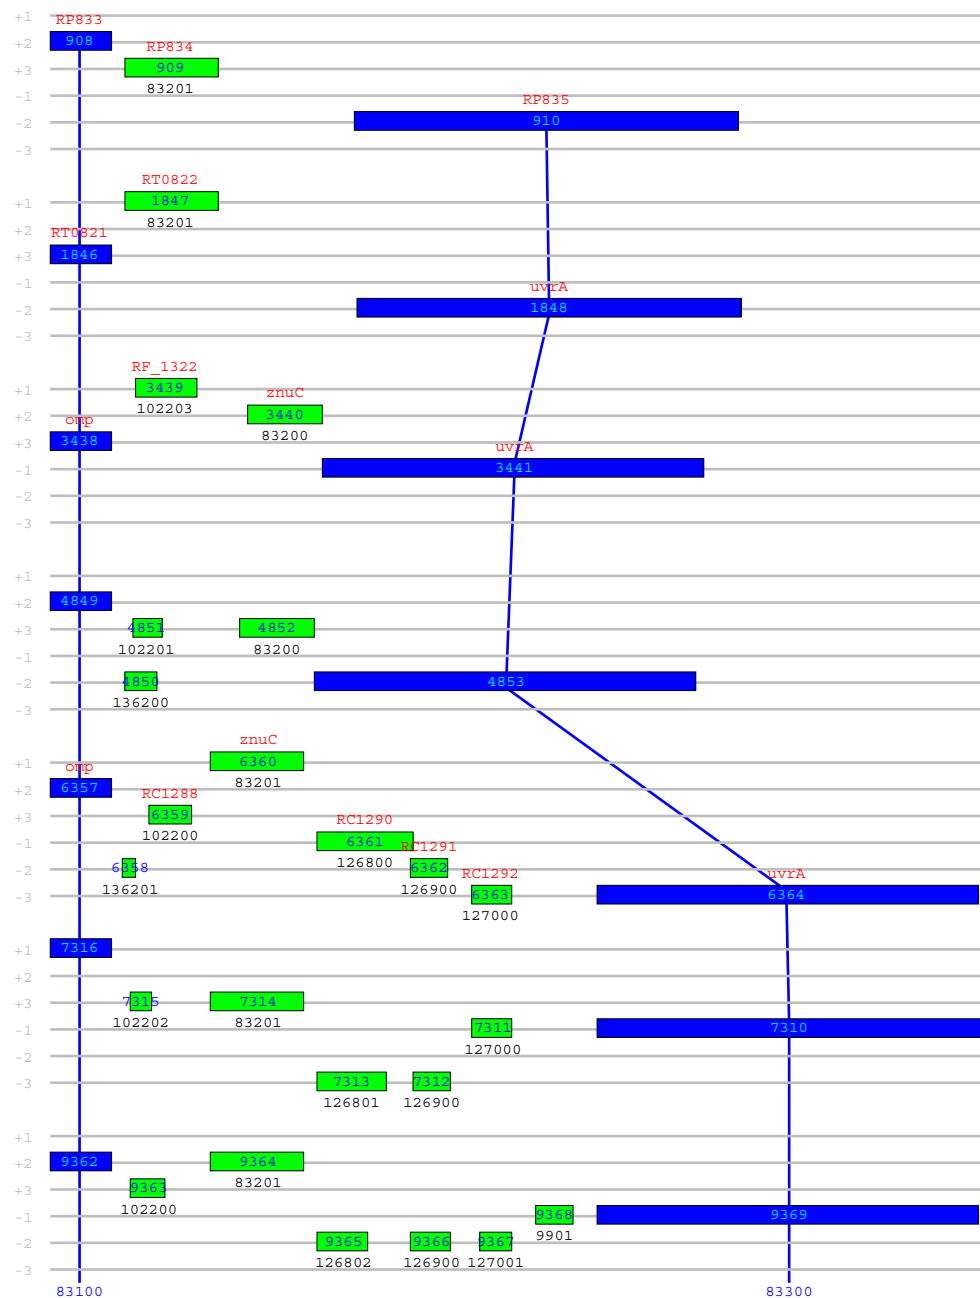



1 Rickettsia prowazekii str. Madrid E, complete genome  
 2 Rickettsia typhi str. wilmington, complete genome  
 3 Rickettsia felis URRWXCal2, complete genome  
 4 Rickettsia akari str. Hartford chromosome, whole genome shotgun sequence  
 5 Rickettsia conorii str. Malish 7, complete genome  
 6 Rickettsia sibirica 246 rsib\_agnrcrt, whole genome shotgun sequence  
 7 Rickettsia rickettsii chromosome, whole genome shotgun sequence

Reg\_id: 320

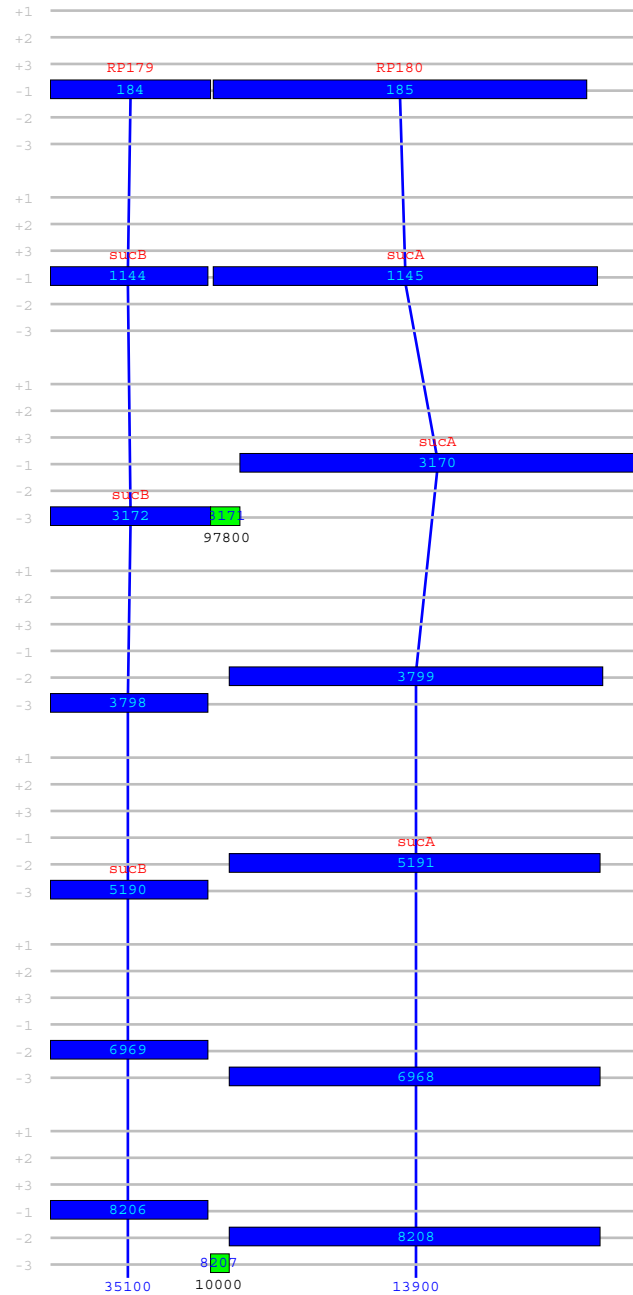

- 1 Rickettsia prowazekii str. Madrid E, complete genome
- 2 Rickettsia typhi str. wilmington, complete genome
- 3 Rickettsia felis URRWXCal2, complete genome
- 4 Rickettsia akari str. Hartford chromosome, whole genome shotgun sequence
- 5 Rickettsia conorii str. Malish 7, complete genome
- 6 Rickettsia sibirica 246 rsib\_agnrcr, whole genome shotgun sequence
- 7 Rickettsia rickettsii chromosome, whole genome shotgun sequence

Reg\_id: 322

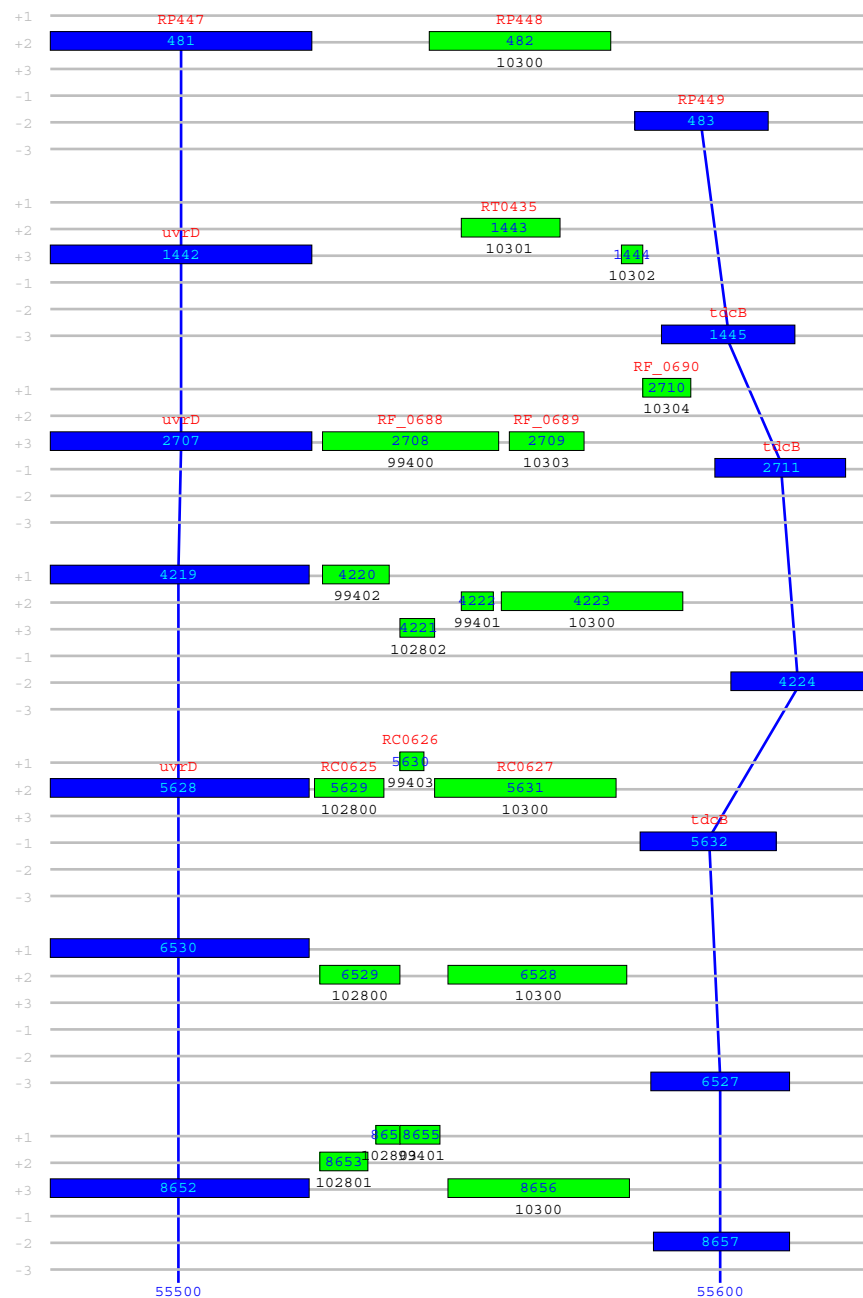

1 Rickettsia prowazekii str. Madrid E, complete genome  
 2 Rickettsia typhi str. wilmington, complete genome  
 3 Rickettsia felis URRWXCal2, complete genome  
 4 Rickettsia akari str. Hartford chromosome, whole genome shotgun sequence  
 5 Rickettsia conorii str. Malish 7, complete genome  
 6 Rickettsia sibirica 246 rsib\_agnrcr, whole genome shotgun sequence  
 7 Rickettsia rickettsii chromosome, whole genome shotgun sequence

Reg\_id: 323

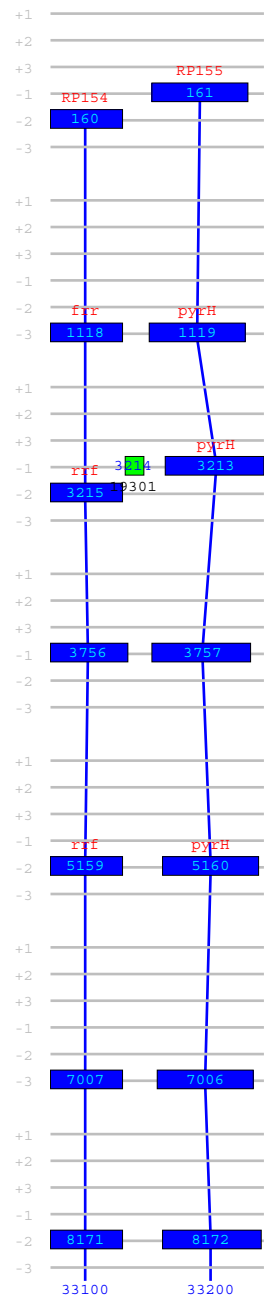

- 1 Rickettsia prowazekii str. Madrid E, complete genome
- 2 Rickettsia typhi str. wilmington, complete genome
- 3 Rickettsia felis URRWXCal2, complete genome
- 4 Rickettsia akari str. Hartford chromosome, whole genome shotgun sequence
- 5 Rickettsia conorii str. Malish 7, complete genome
- 6 Rickettsia sibirica 246 rsib\_agnrcr, whole genome shotgun sequence
- 7 Rickettsia rickettsii chromosome, whole genome shotgun sequence

Reg\_id: 324

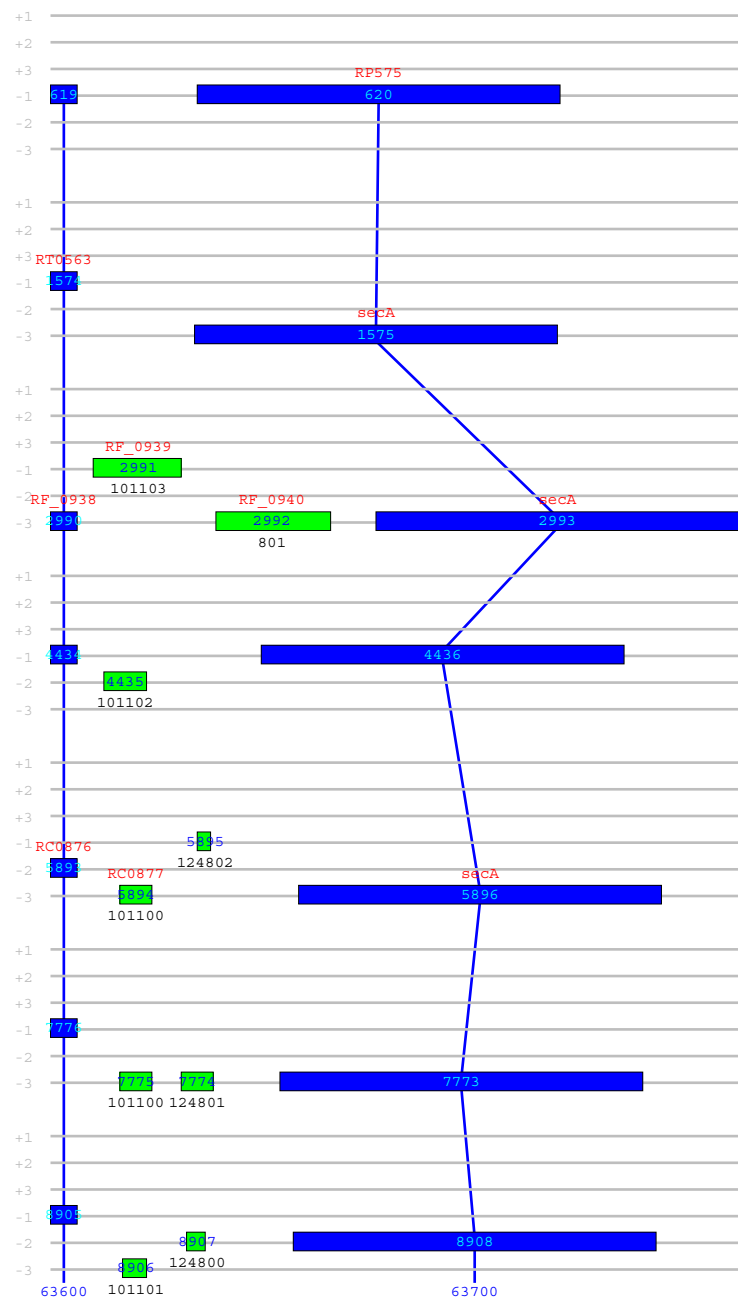

1 Rickettsia prowazekii str. Madrid E, complete genome  
 2 Rickettsia typhi str. wilmington, complete genome  
 3 Rickettsia felis URRWXCal2, complete genome  
 4 Rickettsia akari str. Hartford chromosome, whole genome shotgun sequence  
 5 Rickettsia conorii str. Malish 7, complete genome  
 6 Rickettsia sibirica 246 rsib\_agnrcr, whole genome shotgun sequence  
 7 Rickettsia rickettsii chromosome, whole genome shotgun sequence

Reg\_id: 328

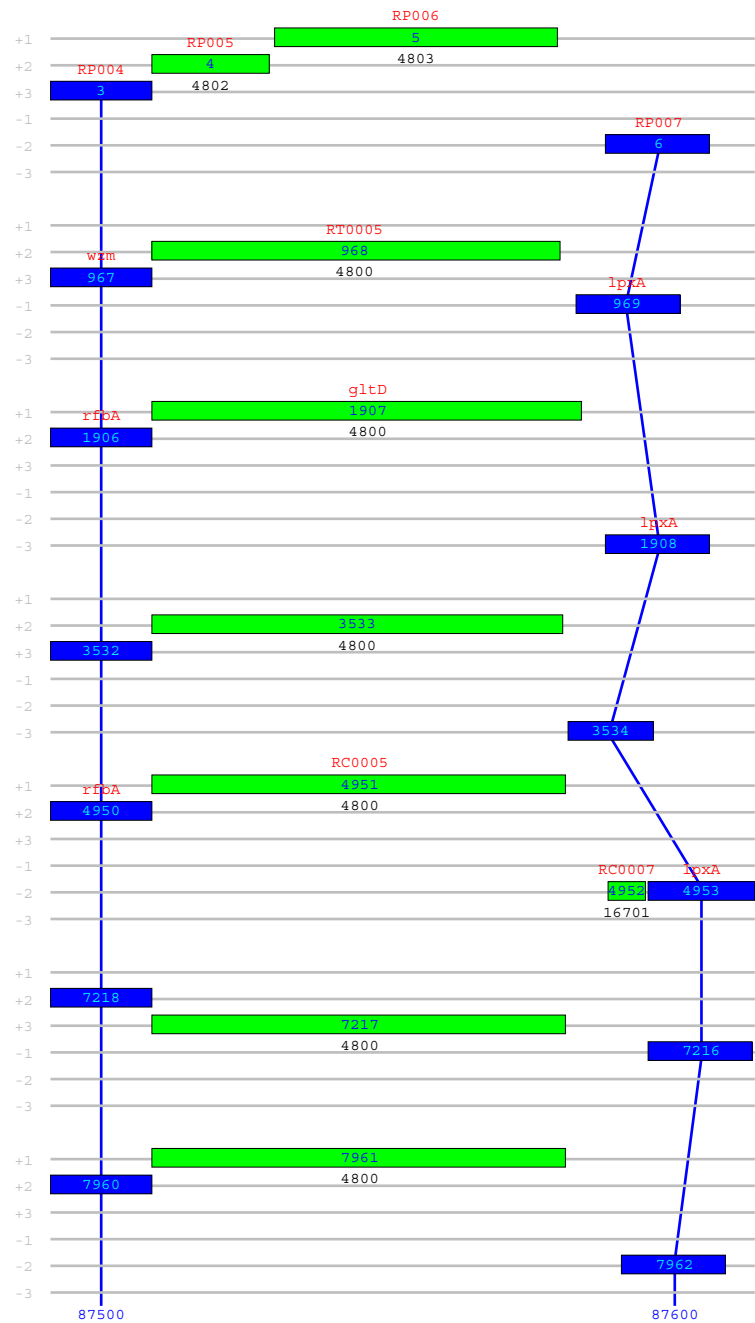

- 1 Rickettsia prowazekii str. Madrid E, complete genome
- 2 Rickettsia typhi str. wilmington, complete genome
- 3 Rickettsia felis URRWXCal2, complete genome
- 4 Rickettsia akari str. Hartford chromosome, whole genome shotgun sequence
- 5 Rickettsia conorii str. Malish 7, complete genome
- 6 Rickettsia sibirica 246 rsib\_agnrcr, whole genome shotgun sequence
- 7 Rickettsia rickettsii chromosome, whole genome shotgun sequence

Reg\_id: 331

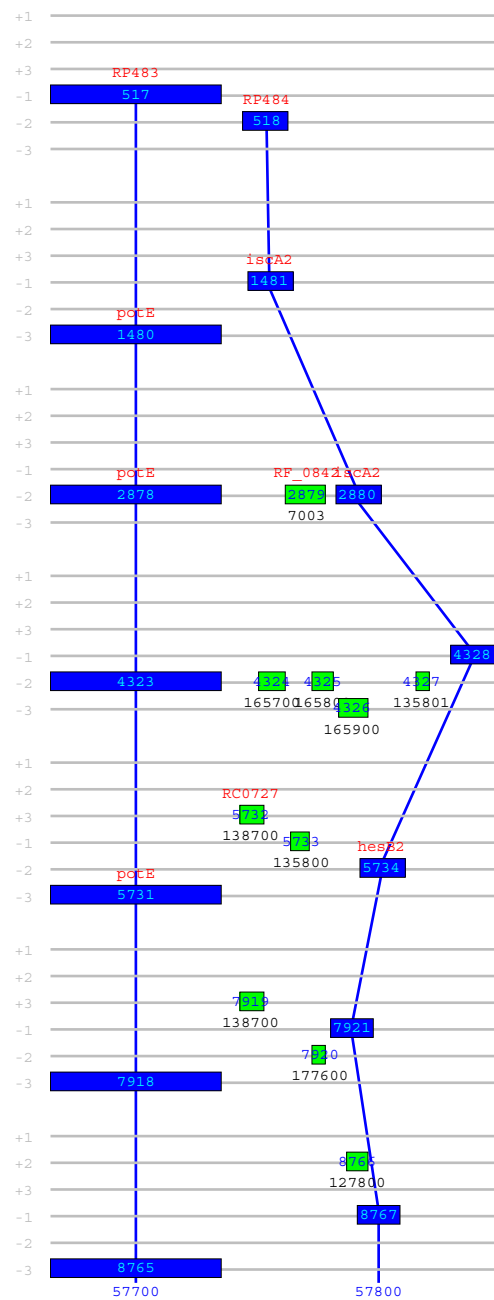

- 1 Rickettsia prowazekii str. Madrid E, complete genome
- 2 Rickettsia typhi str. wilmington, complete genome
- 3 Rickettsia felis URRWXCal2, complete genome
- 4 Rickettsia akari str. Hartford chromosome, whole genome shotgun sequence
- 5 Rickettsia conorii str. Malish 7, complete genome
- 6 Rickettsia sibirica 246 rsib\_agnrcr, whole genome shotgun sequence
- 7 Rickettsia rickettsii chromosome, whole genome shotgun sequence

Reg\_id: 334

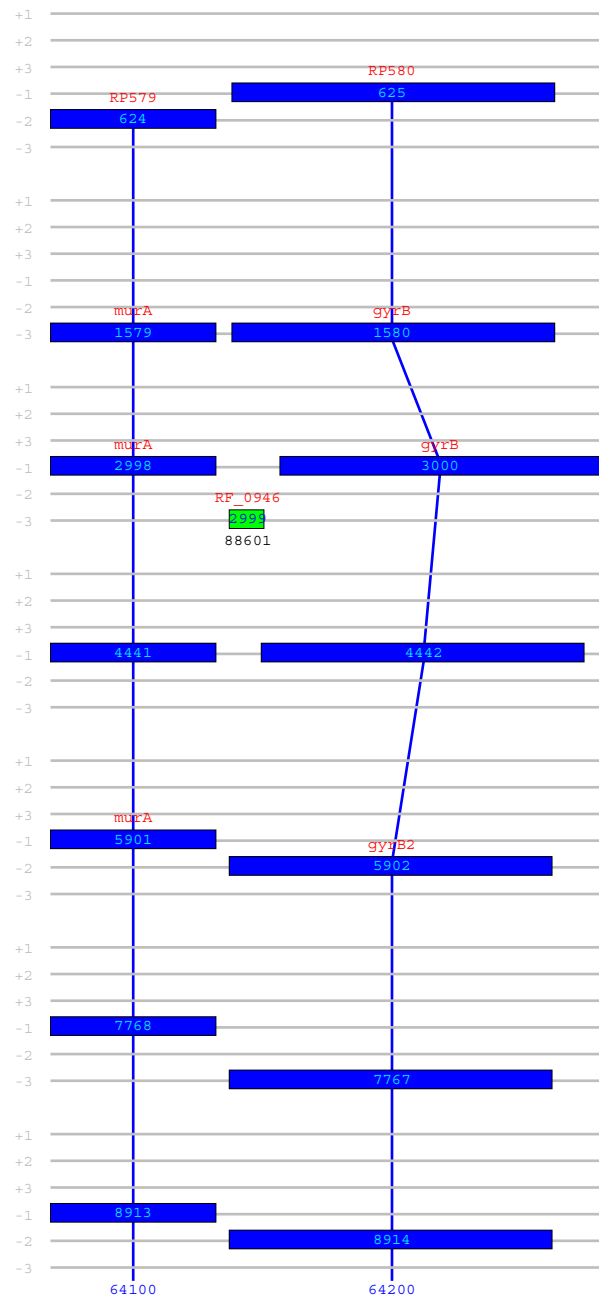

- 1 Rickettsia prowazekii str. Madrid E, complete genome
- 2 Rickettsia typhi str. wilmington, complete genome
- 3 Rickettsia felis URRWXCal2, complete genome
- 4 Rickettsia akari str. Hartford chromosome, whole genome shotgun sequence
- 5 Rickettsia conorii str. Malish 7, complete genome
- 6 Rickettsia sibirica 246 rsib\_agnrct, whole genome shotgun sequence
- 7 Rickettsia rickettsii chromosome, whole genome shotgun sequence

Reg\_id: 337

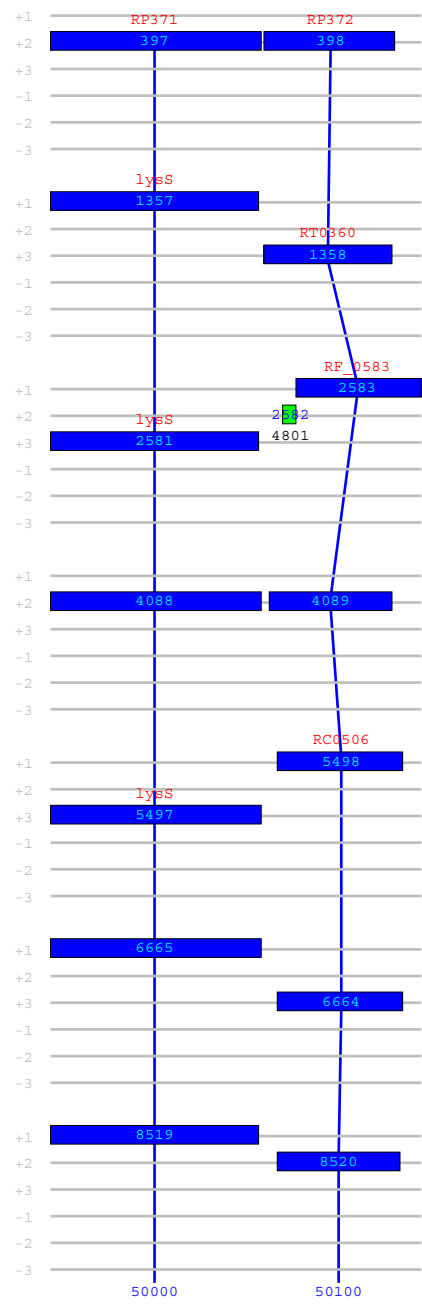



- 1 Rickettsia prowazekii str. Madrid E, complete genome
- 2 Rickettsia typhi str. wilmington, complete genome
- 3 Rickettsia felis URRWXCa12, complete genome
- 4 Rickettsia akari str. Hartford chromosome, whole genome shotgun sequence
- 5 Rickettsia conorii str. Malish 7, complete genome
- 6 Rickettsia sibirica 246 rsib\_agncrt, whole genome shotgun sequence
- 7 Rickettsia rickettsii chromosome, whole genome shotgun sequence

Reg\_id: 338

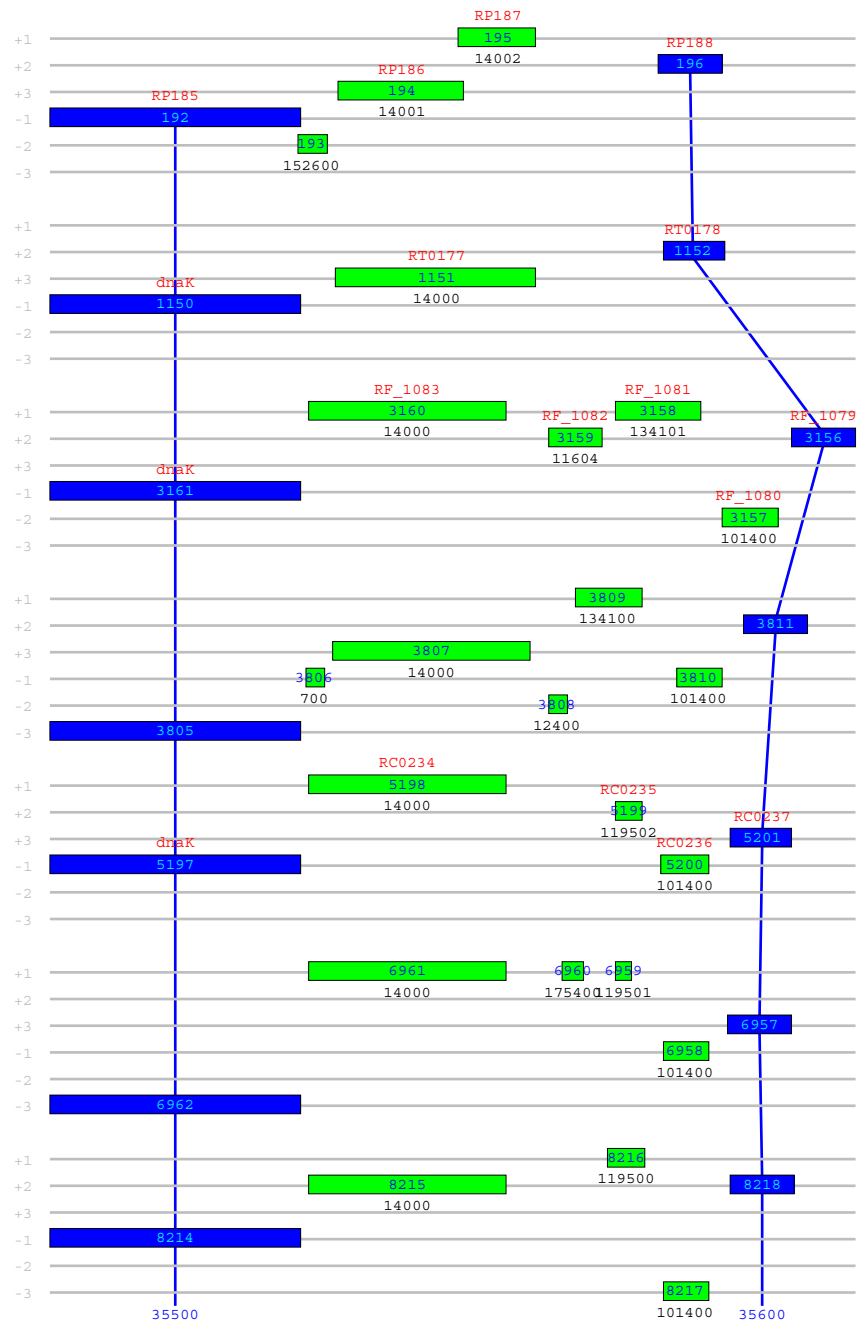

1 Rickettsia prowazekii str. Madrid E, complete genome  
 2 Rickettsia typhi str. wilmington, complete genome  
 3 Rickettsia felis URRWXCal2, complete genome  
 4 Rickettsia akari str. Hartford chromosome, whole genome shotgun sequence  
 5 Rickettsia conorii str. Malish 7, complete genome  
 6 Rickettsia sibirica 246 rsib\_agnrt, whole genome shotgun sequence  
 7 Rickettsia rickettsii chromosome, whole genome shotgun sequence

Reg\_id: 339

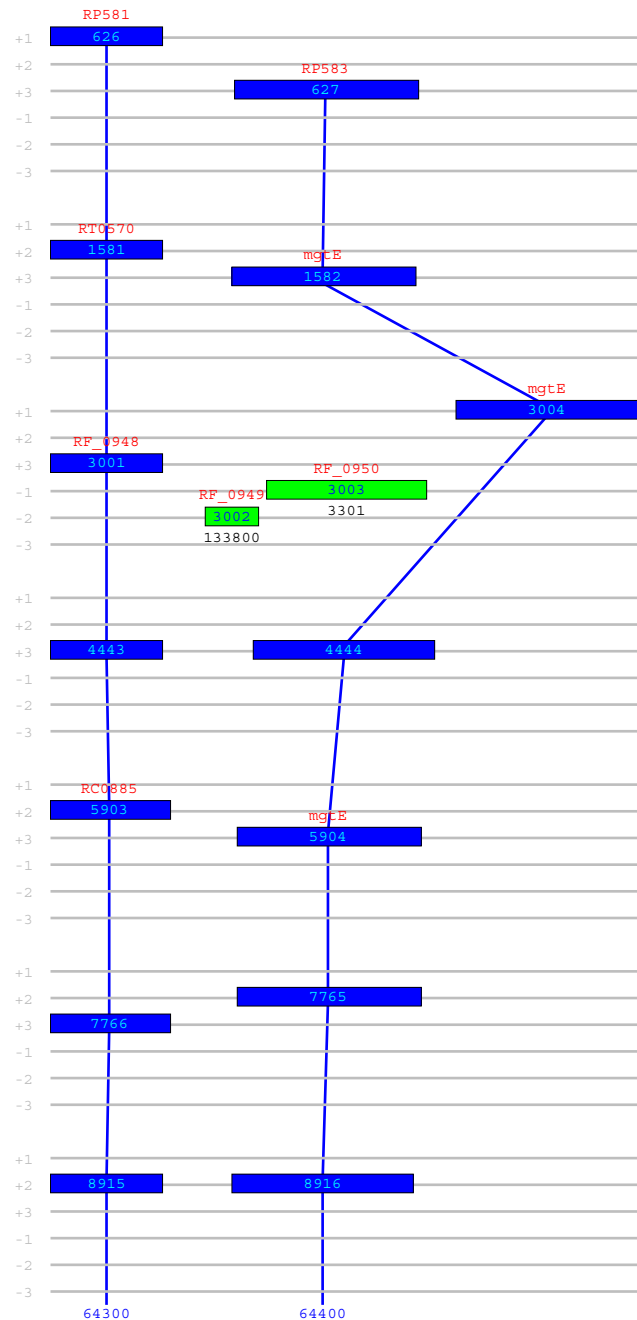

1 Rickettsia prowazekii str. Madrid E, complete genome  
 2 Rickettsia typhi str. wilmington, complete genome  
 3 Rickettsia felis URRWXCal2, complete genome  
 4 Rickettsia akari str. Hartford chromosome, whole genome shotgun sequence  
 5 Rickettsia conorii str. Malish 7, complete genome  
 6 Rickettsia sibirica 246 rsib\_agnrct, whole genome shotgun sequence  
 7 Rickettsia rickettsii chromosome, whole genome shotgun sequence

Reg\_id: 340

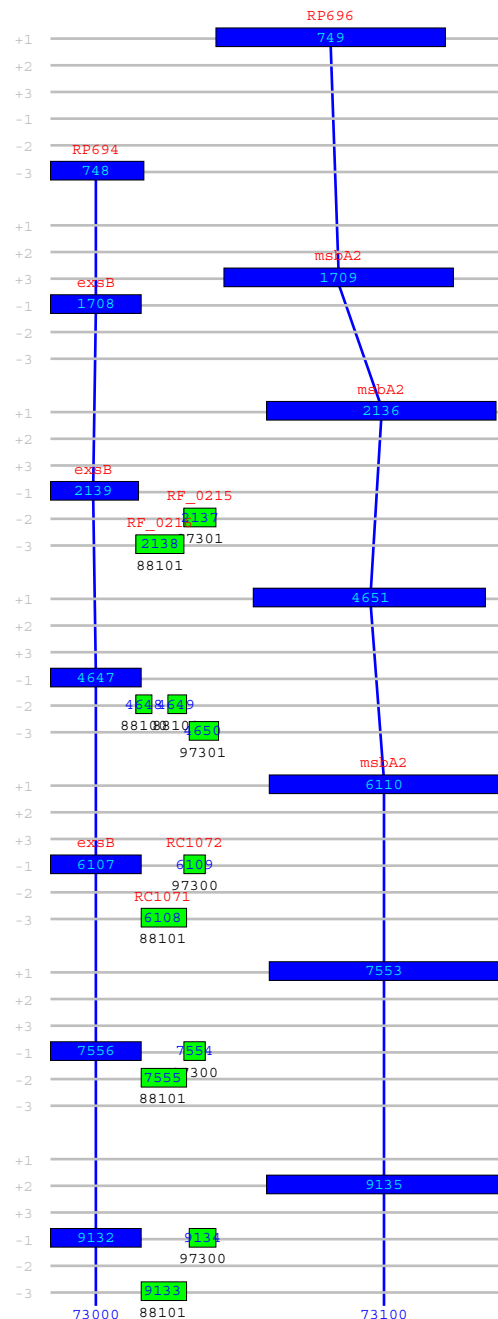

1 Rickettsia prowazekii str. Madrid E, complete genome  
 2 Rickettsia typhi str. wilmington, complete genome  
 3 Rickettsia felis URRWXCal2, complete genome  
 4 Rickettsia akari str. Hartford chromosome, whole genome shotgun sequence  
 5 Rickettsia conorii str. Malish 7, complete genome  
 6 Rickettsia sibirica 246 rsib\_agnrct, whole genome shotgun sequence  
 7 Rickettsia rickettsii chromosome, whole genome shotgun sequence

Reg\_id: 341

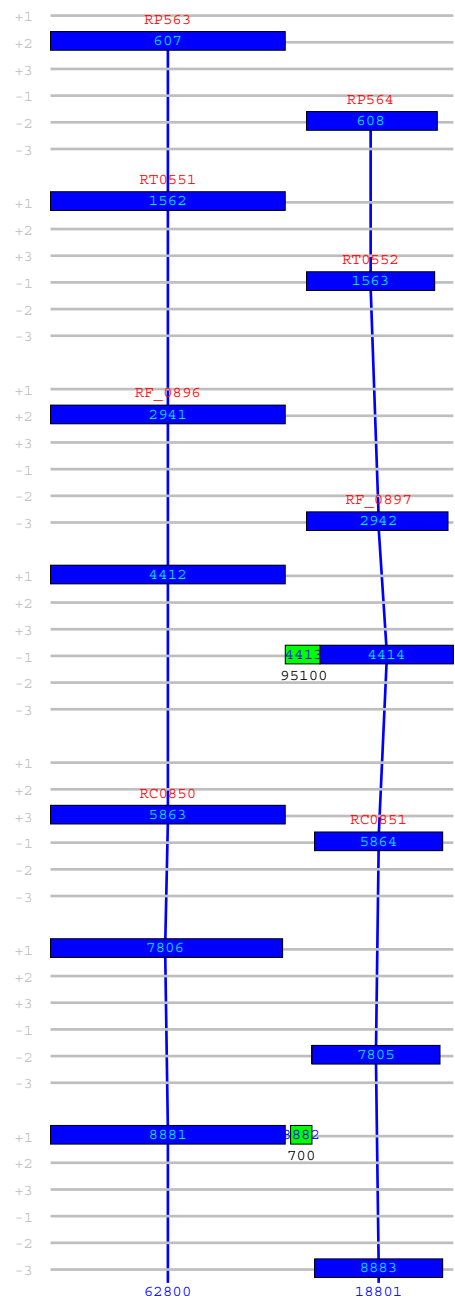

1 Rickettsia prowazekii str. Madrid E, complete genome  
 2 Rickettsia typhi str. wilmington, complete genome  
 3 Rickettsia felis URRWXCal2, complete genome  
 4 Rickettsia akari str. Hartford chromosome, whole genome shotgun sequence  
 5 Rickettsia conorii str. Malish 7, complete genome  
 6 Rickettsia sibirica 246 rsib\_agnrcr, whole genome shotgun sequence  
 7 Rickettsia rickettsii chromosome, whole genome shotgun sequence

Reg\_id: 343

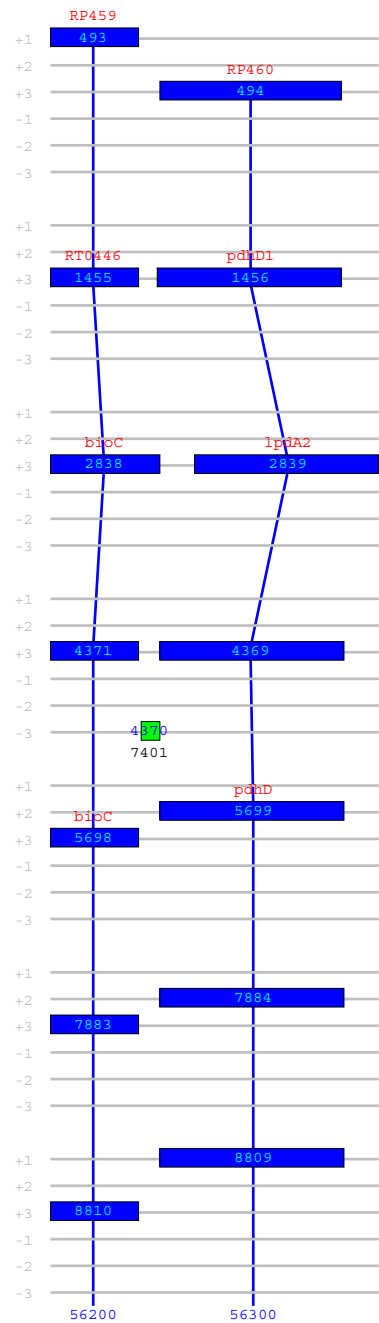

- 1 Rickettsia prowazekii str. Madrid E, complete genome
- 2 Rickettsia typhi str. wilmington, complete genome
- 3 Rickettsia felis URRWXCal2, complete genome
- 4 Rickettsia akari str. Hartford chromosome, whole genome shotgun sequence
- 5 Rickettsia conorii str. Malish 7, complete genome
- 6 Rickettsia sibirica 246 rsib\_agncrt, whole genome shotgun sequence
- 7 Rickettsia rickettsii chromosome, whole genome shotgun sequence

Reg\_id: 346

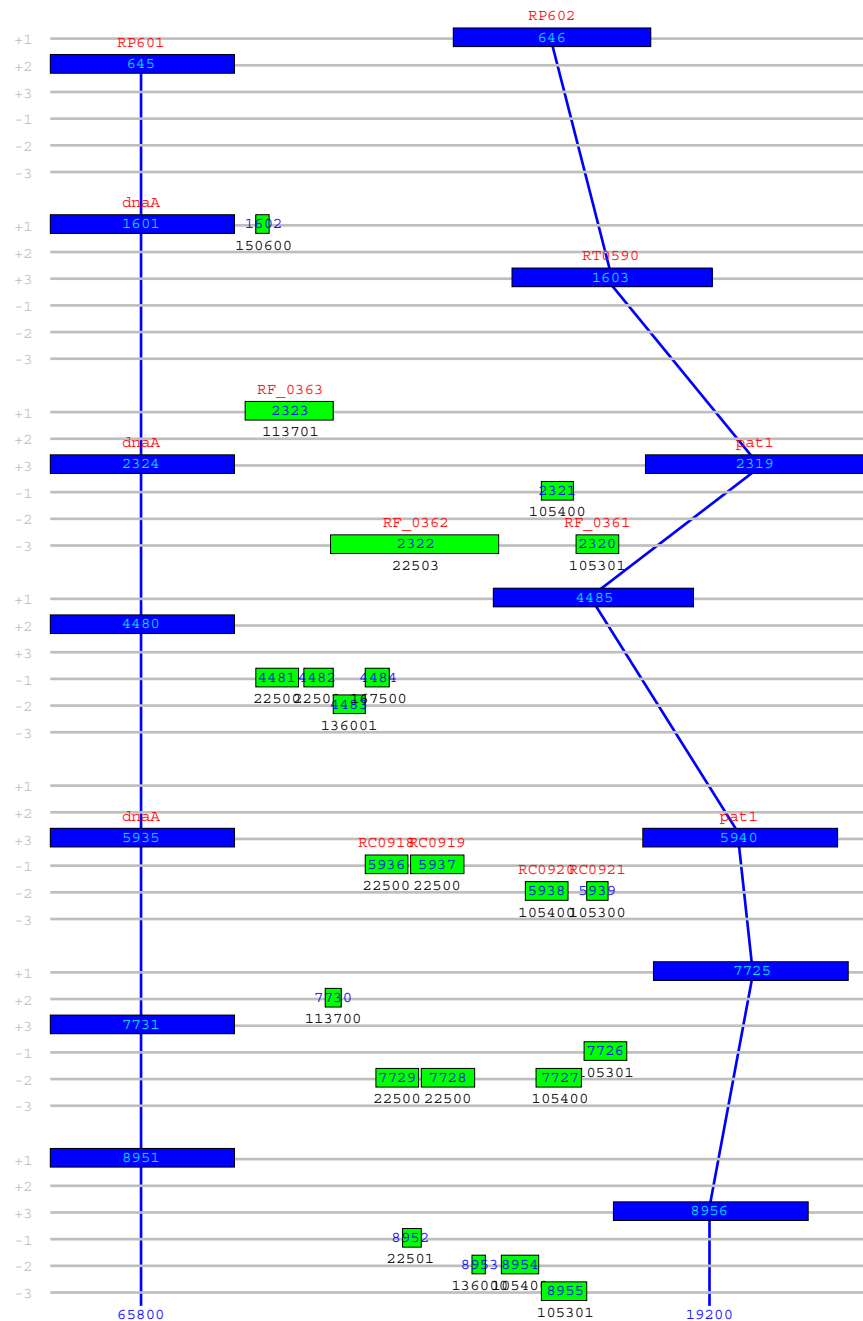

1 Rickettsia prowazekii str. Madrid E, complete genome  
 2 Rickettsia typhi str. wilmington, complete genome  
 3 Rickettsia felis URRWXCal2, complete genome  
 4 Rickettsia akari str. Hartford chromosome, whole genome shotgun sequence  
 5 Rickettsia conorii str. Malish 7, complete genome  
 6 Rickettsia sibirica 246 rsib\_agnrct, whole genome shotgun sequence  
 7 Rickettsia rickettsii chromosome, whole genome shotgun sequence

Reg\_id: 351

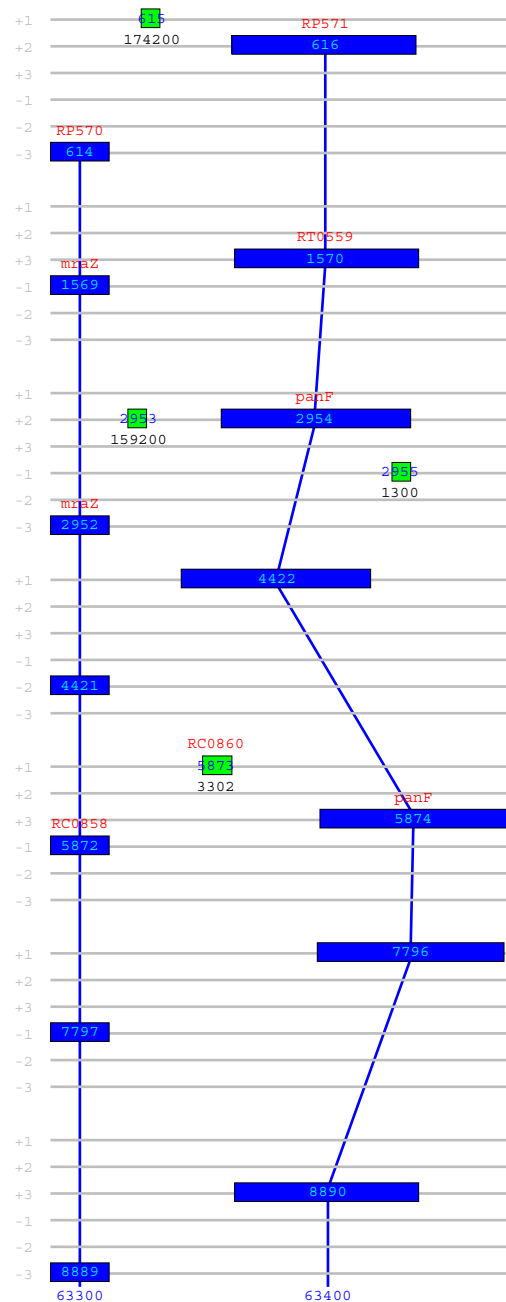

1 Rickettsia prowazekii str. Madrid E, complete genome  
 2 Rickettsia typhi str. wilmington, complete genome  
 3 Rickettsia felis URRWXCal2, complete genome  
 4 Rickettsia akari str. Hartford chromosome, whole genome shotgun sequence  
 5 Rickettsia conorii str. Malish 7, complete genome  
 6 Rickettsia sibirica 246 rsib\_agnrcr, whole genome shotgun sequence  
 7 Rickettsia rickettsii chromosome, whole genome shotgun sequence

Reg\_id: 357

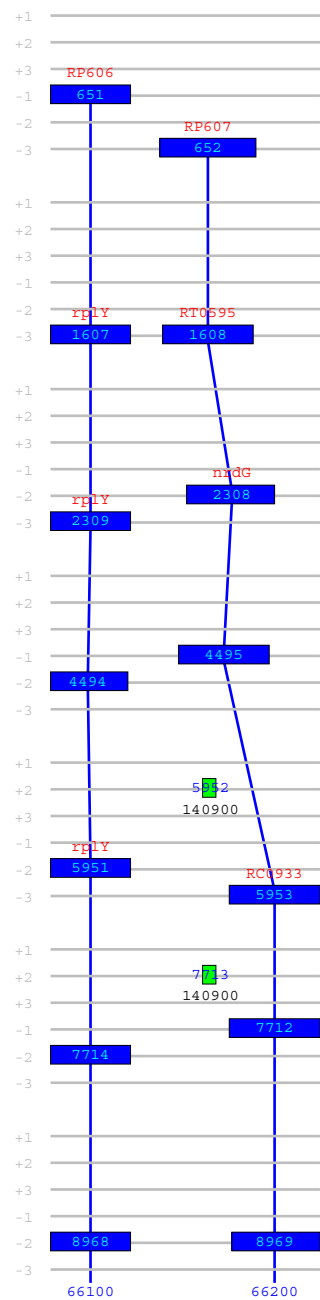



1 Rickettsia prowazekii str. Madrid E, complete genome  
 2 Rickettsia typhi str. wilmington, complete genome  
 3 Rickettsia felis URRWXCa12, complete genome  
 4 Rickettsia akari str. Hartford chromosome, whole genome shotgun sequence  
 5 Rickettsia conorii str. Malish 7, complete genome  
 6 Rickettsia sibirica 246 rsib\_agnrcr, whole genome shotgun sequence  
 7 Rickettsia rickettsii chromosome, whole genome shotgun sequence

Reg\_id: 358

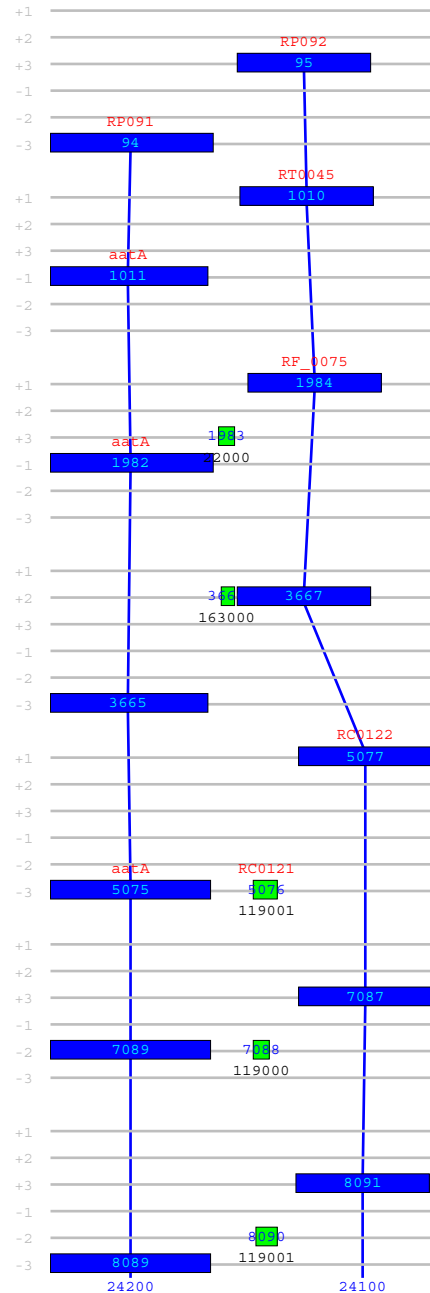

- 1 Rickettsia prowazekii str. Madrid E, complete genome
- 2 Rickettsia typhi str. wilmington, complete genome
- 3 Rickettsia felis URRWXCal2, complete genome
- 4 Rickettsia akari str. Hartford chromosome, whole genome shotgun sequence
- 5 Rickettsia conorii str. Malish 7, complete genome
- 6 Rickettsia sibirica 246 rsib\_agnrcr, whole genome shotgun sequence
- 7 Rickettsia rickettsii chromosome, whole genome shotgun sequence

Reg\_id: 361

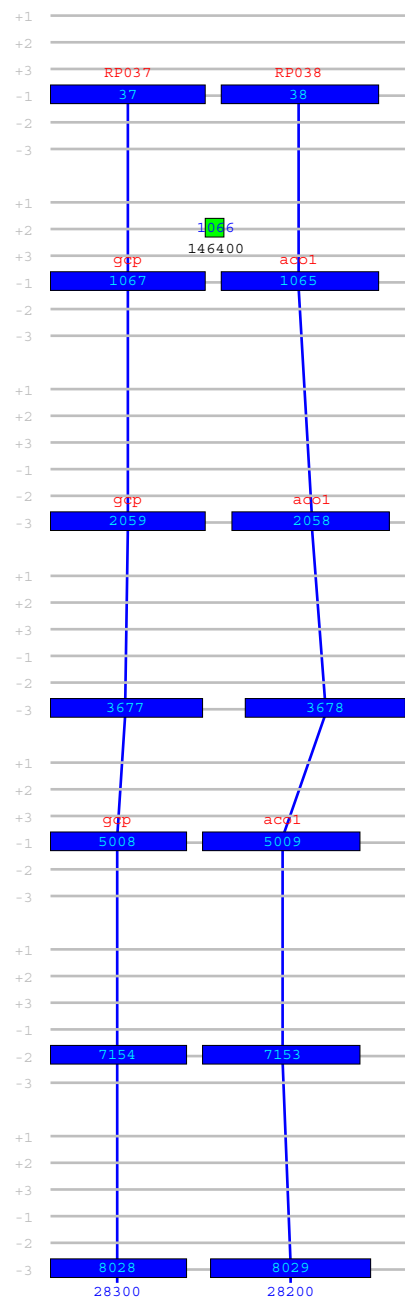

1 Rickettsia prowazekii str. Madrid E, complete genome  
 2 Rickettsia typhi str. wilmington, complete genome  
 3 Rickettsia felis URRWXCal2, complete genome  
 4 Rickettsia akari str. Hartford chromosome, whole genome shotgun sequence  
 5 Rickettsia conorii str. Malish 7, complete genome  
 6 Rickettsia sibirica 246 rsib\_agnrct, whole genome shotgun sequence  
 7 Rickettsia rickettsii chromosome, whole genome shotgun sequence

Reg\_id: 365

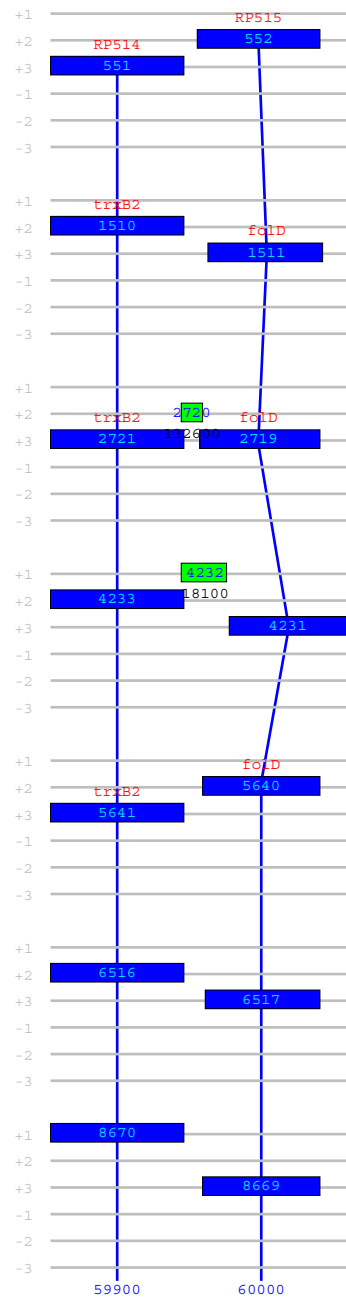

1 Rickettsia prowazekii str. Madrid E, complete genome  
 2 Rickettsia typhi str. wilmington, complete genome  
 3 Rickettsia felis URRWXCal2, complete genome  
 4 Rickettsia akari str. Hartford chromosome, whole genome shotgun sequence  
 5 Rickettsia conorii str. Malish 7, complete genome  
 6 Rickettsia sibirica 246 rsib\_agnrct, whole genome shotgun sequence  
 7 Rickettsia rickettsii chromosome, whole genome shotgun sequence

Reg\_id: 366

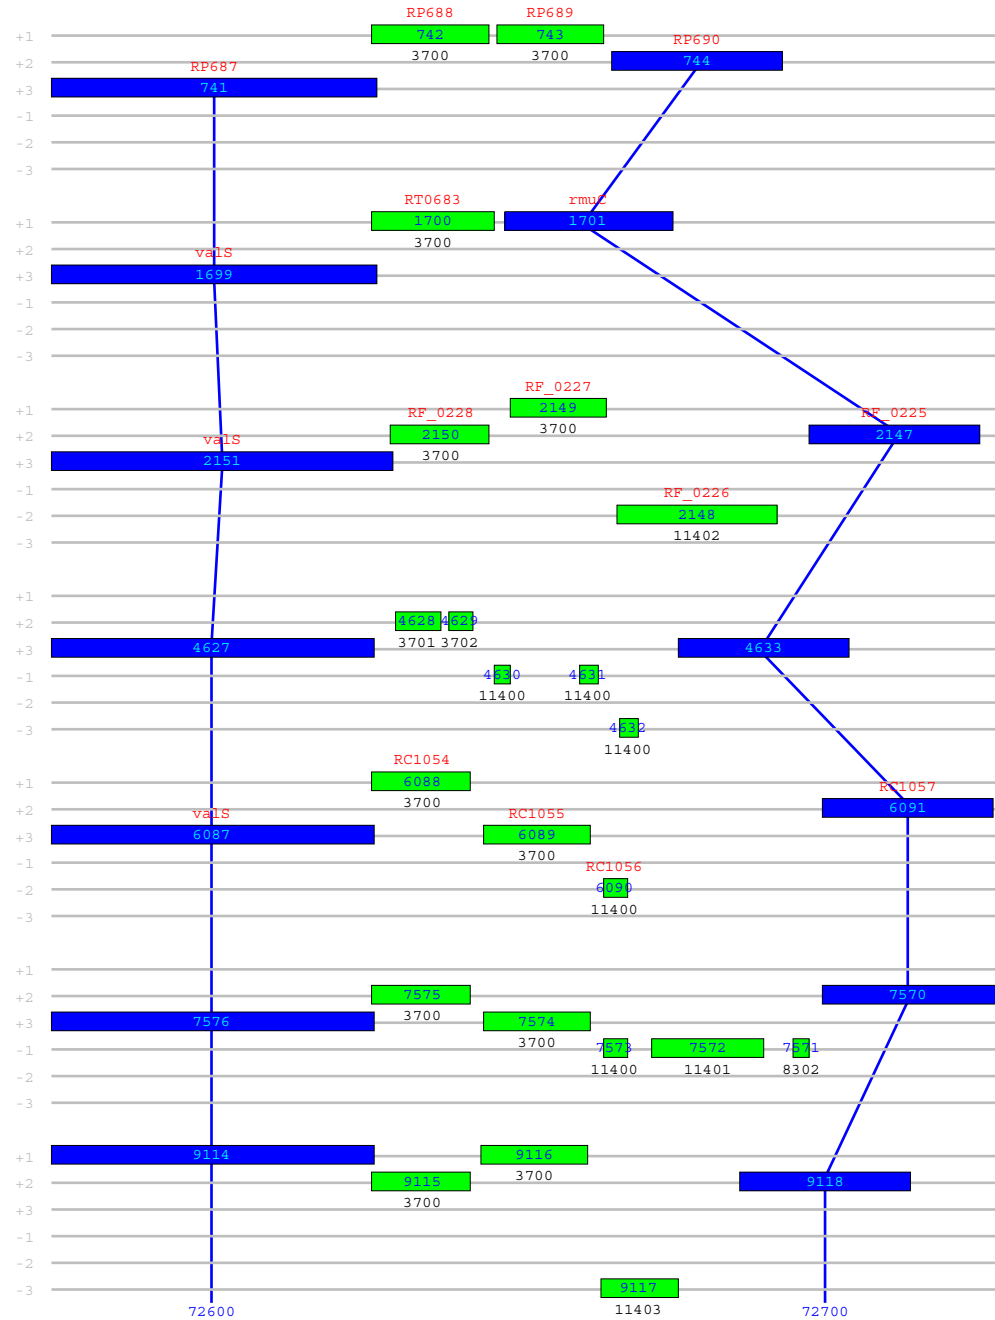

1 Rickettsia prowazekii str. Madrid E, complete genome  
 2 Rickettsia typhi str. wilmington, complete genome  
 3 Rickettsia felis URRWXCAl2, complete genome  
 4 Rickettsia akari str. Hartford chromosome, whole genome shotgun sequence  
 5 Rickettsia conorii str. Malish 7, complete genome  
 6 Rickettsia sibirica 246 rsib\_agnrcr, whole genome shotgun sequence  
 7 Rickettsia rickettsii chromosome, whole genome shotgun sequence

Reg\_id: 368

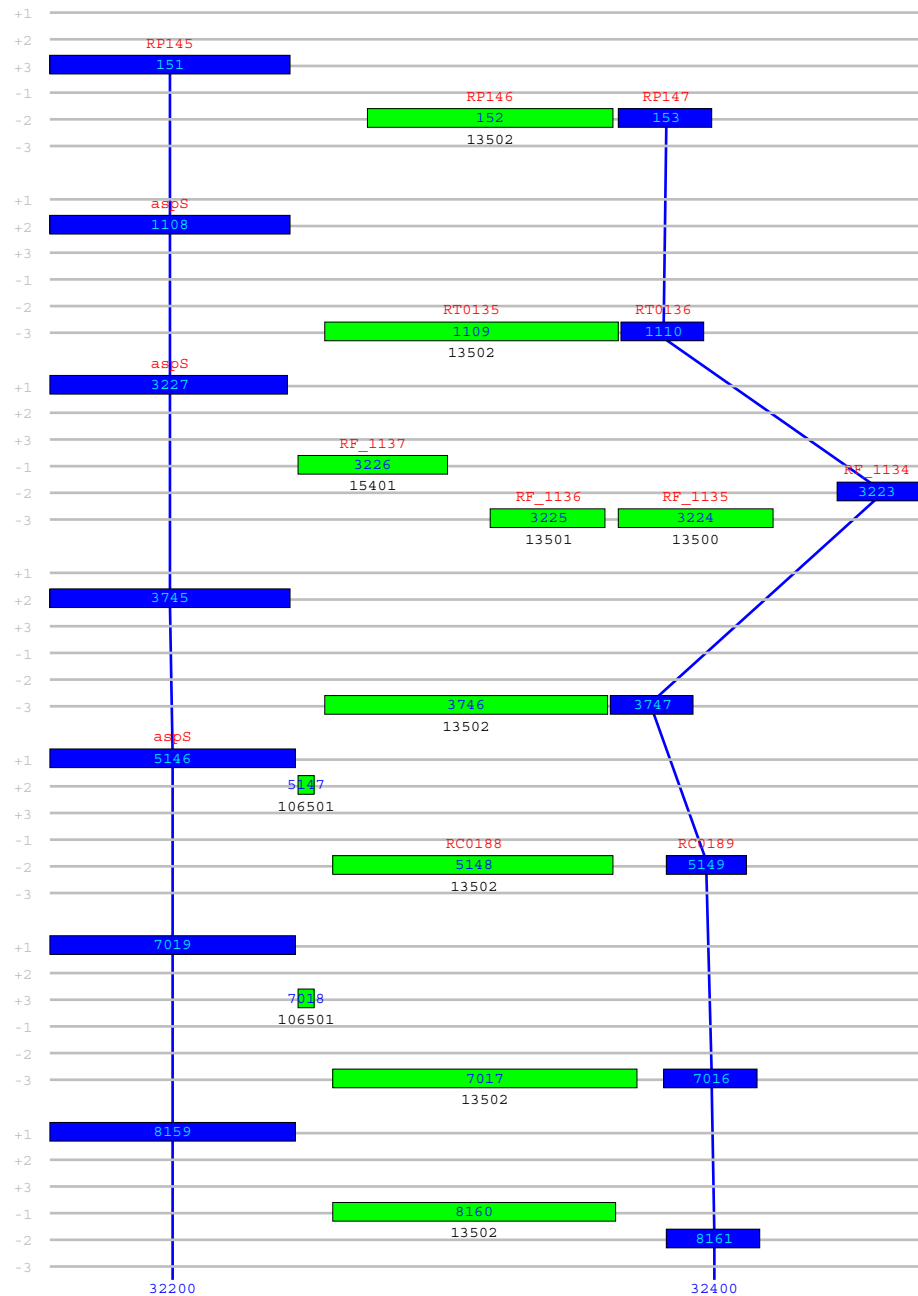



1 Rickettsia prowazekii str. Madrid E, complete genome  
 2 Rickettsia typhi str. wilmington, complete genome  
 3 Rickettsia felis URRWXCal2, complete genome  
 4 Rickettsia akari str. Hartford chromosome, whole genome shotgun sequence  
 5 Rickettsia conorii str. Malish 7, complete genome  
 6 Rickettsia sibirica 246 rsib\_agnrcr, whole genome shotgun sequence  
 7 Rickettsia rickettsii chromosome, whole genome shotgun sequence

Reg\_id: 377

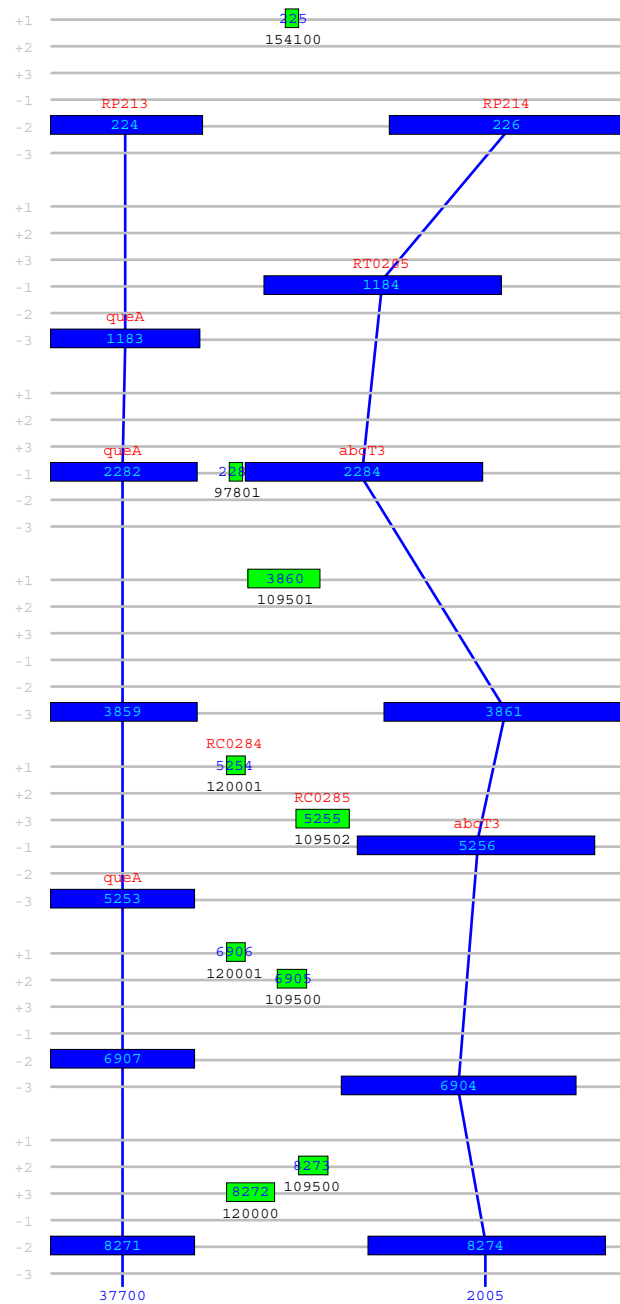

1 Rickettsia prowazekii str. Madrid E, complete genome  
 2 Rickettsia typhi str. Wilmington, complete genome  
 3 Rickettsia felis URRWXCal2, complete genome  
 4 Rickettsia akari str. Hartford chromosome, whole genome shotgun sequence  
 5 Rickettsia conorii str. Malish 7, complete genome  
 6 Rickettsia sibirica 246 rsib agncrt, whole genome shotgun sequence  
 7 Rickettsia rickettsii chromosome, whole genome shotgun sequence

Reg\_id: 378

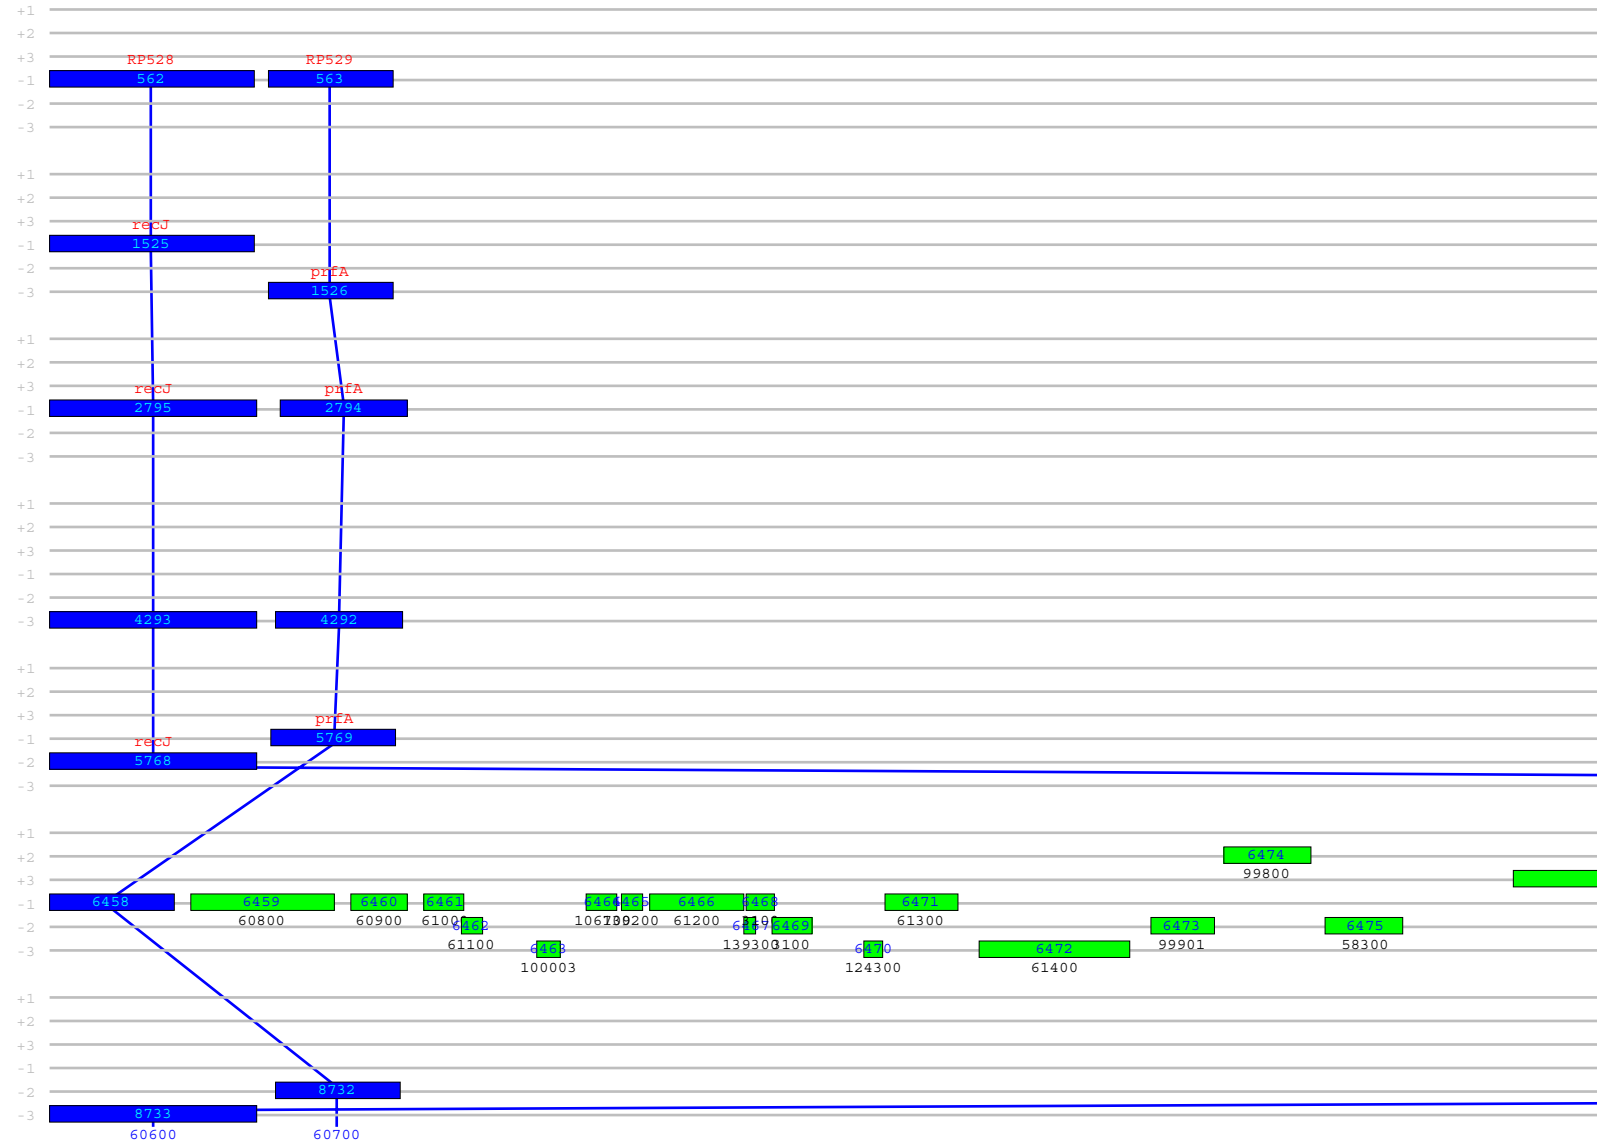



1 Rickettsia prowazekii str. Madrid E, complete genome  
 2 Rickettsia typhi str. wilmington, complete genome  
 3 Rickettsia felis URRWXCal2, complete genome  
 4 Rickettsia akari str. Hartford chromosome, whole genome shotgun sequence  
 5 Rickettsia conorii str. Malish 7, complete genome  
 6 Rickettsia sibirica 246 rsib\_agnrcr, whole genome shotgun sequence  
 7 Rickettsia rickettsii chromosome, whole genome shotgun sequence

Reg\_id: 382

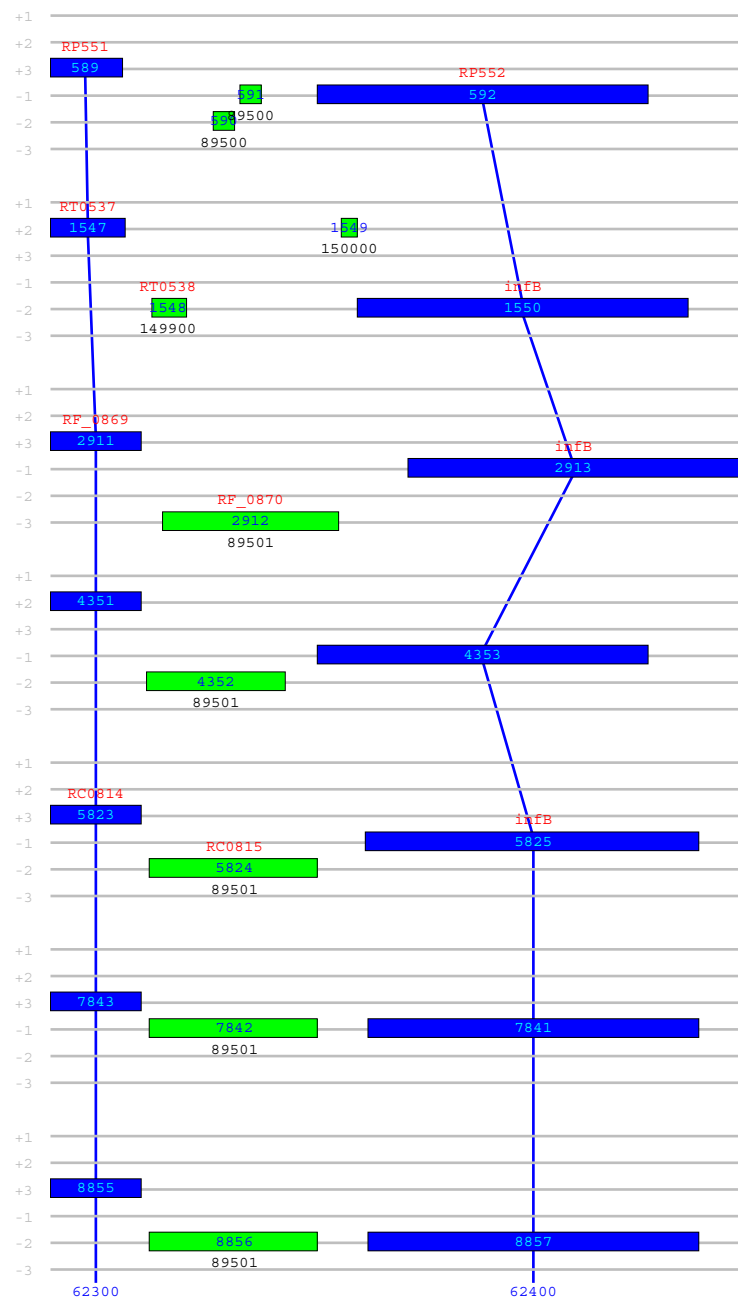

- 1 Rickettsia prowazekii str. Madrid E, complete genome
- 2 Rickettsia typhi str. wilmington, complete genome
- 3 Rickettsia felis URRWXCal2, complete genome
- 4 Rickettsia akari str. Hartford chromosome, whole genome shotgun sequence
- 5 Rickettsia conorii str. Malish 7, complete genome
- 6 Rickettsia sibirica 246 rsib\_agnrcr, whole genome shotgun sequence
- 7 Rickettsia rickettsii chromosome, whole genome shotgun sequence

Reg\_id: 385

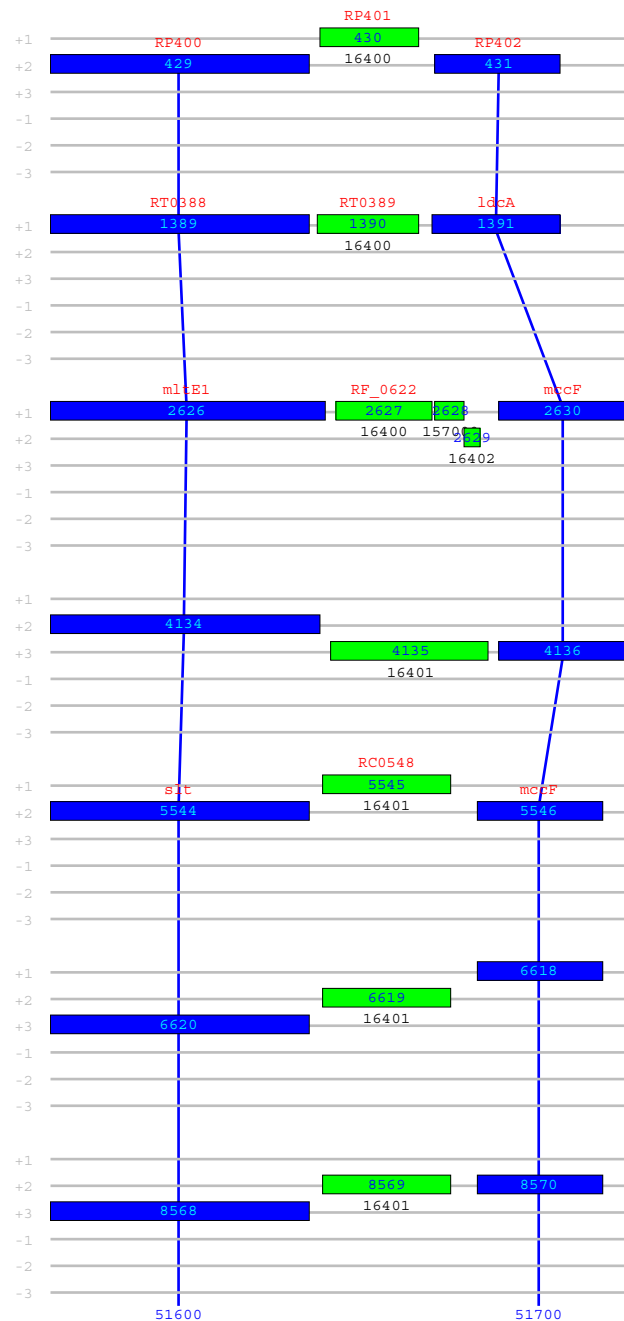



1 Rickettsia prowazekii str. Madrid E, complete genome  
 2 Rickettsia typhi str. wilmington, complete genome  
 3 Rickettsia felis URRWXCal2, complete genome  
 4 Rickettsia akari str. Hartford chromosome, whole genome shotgun sequence  
 5 Rickettsia conorii str. Malish 7, complete genome  
 6 Rickettsia sibirica 246 rsib\_agnrct, whole genome shotgun sequence  
 7 Rickettsia rickettsii chromosome, whole genome shotgun sequence

Reg\_id: 387

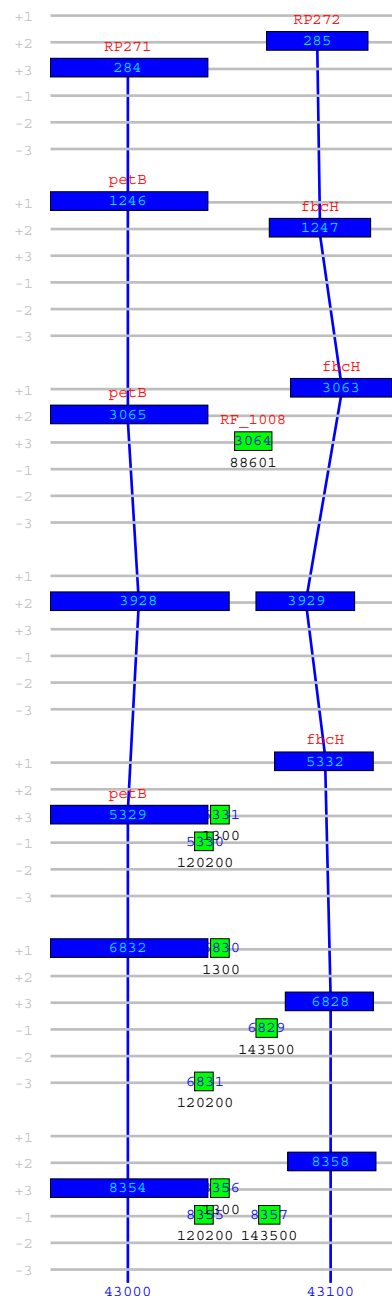

- 1 Rickettsia prowazekii str. Madrid E, complete genome  
 2 Rickettsia typhi str. wilmington, complete genome  
 3 Rickettsia felis URRWXCal2, complete genome  
 4 Rickettsia akari str. Hartford chromosome, whole genome shotgun sequence  
 5 Rickettsia conorii str. Malish 7, complete genome  
 6 Rickettsia sibirica 246 rsib\_agnrcr, whole genome shotgun sequence  
 7 Rickettsia rickettsii chromosome, whole genome shotgun sequence

Reg\_id: 388

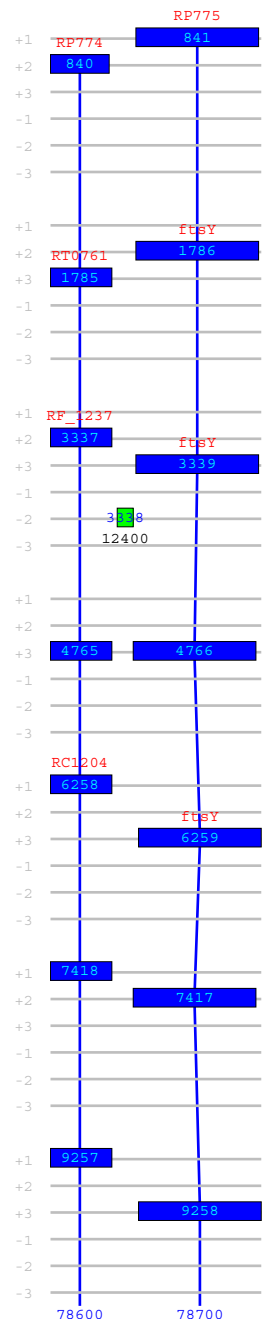

- 1 Rickettsia prowazekii str. Madrid E, complete genome
- 2 Rickettsia typhi str. wilmington, complete genome
- 3 Rickettsia felis URRWXCal2, complete genome
- 4 Rickettsia akari str. Hartford chromosome, whole genome shotgun sequence
- 5 Rickettsia conorii str. Malish 7, complete genome
- 6 Rickettsia sibirica 246 rsib\_agnrcr, whole genome shotgun sequence
- 7 Rickettsia rickettsii chromosome, whole genome shotgun sequence

Reg\_id: 391

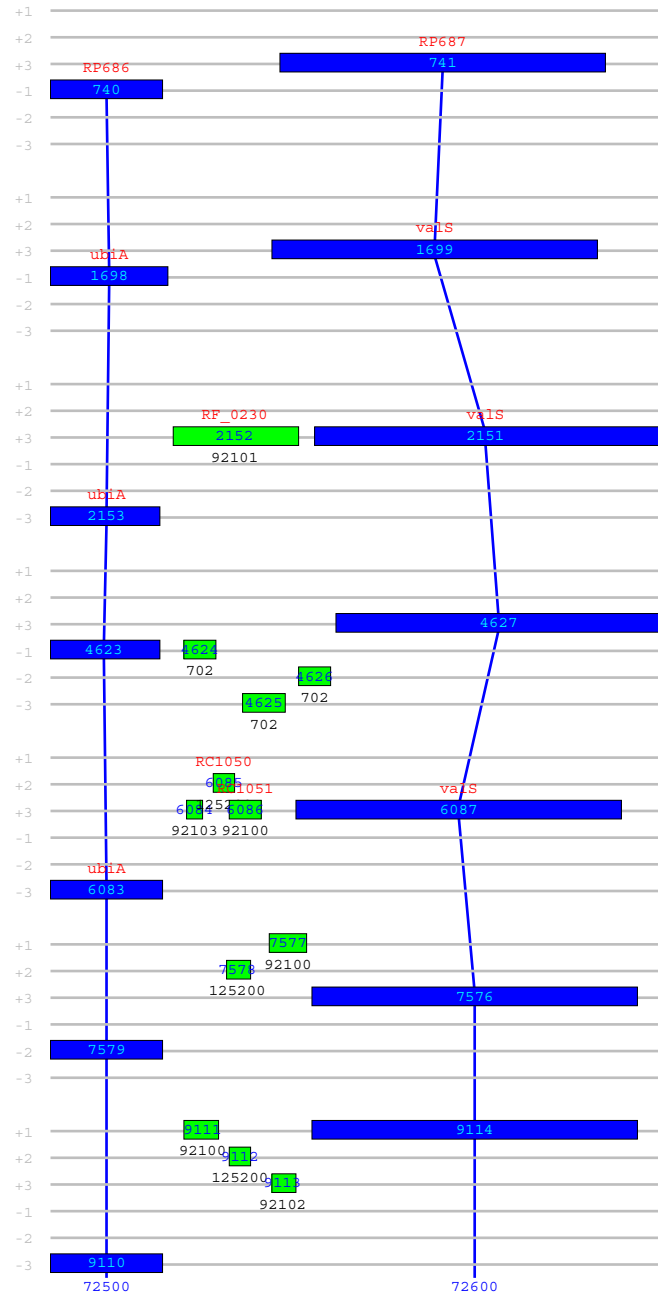

1 Rickettsia prowazekii str. Madrid E, complete genome  
 2 Rickettsia typhi str. wilmington, complete genome  
 3 Rickettsia felis URRWXCal2, complete genome  
 4 Rickettsia akari str. Hartford chromosome, whole genome shotgun sequence  
 5 Rickettsia conorii str. Malish 7, complete genome  
 6 Rickettsia sibirica 246 rsib\_agnrct, whole genome shotgun sequence  
 7 Rickettsia rickettsii chromosome, whole genome shotgun sequence

Reg\_id: 394

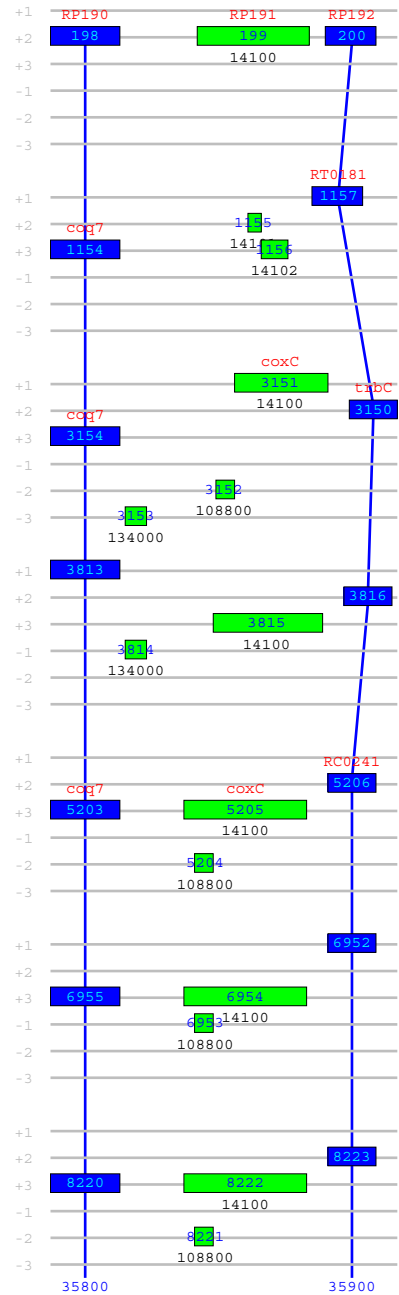

1 Rickettsia prowazekii str. Madrid E, complete genome  
 2 Rickettsia typhi str. wilmington, complete genome  
 3 Rickettsia felis URRWXCal2, complete genome  
 4 Rickettsia akari str. Hartford chromosome, whole genome shotgun sequence  
 5 Rickettsia conorii str. Malish 7, complete genome  
 6 Rickettsia sibirica 246 rsib\_agnrct, whole genome shotgun sequence  
 7 Rickettsia rickettsii chromosome, whole genome shotgun sequence

Reg\_id: 395

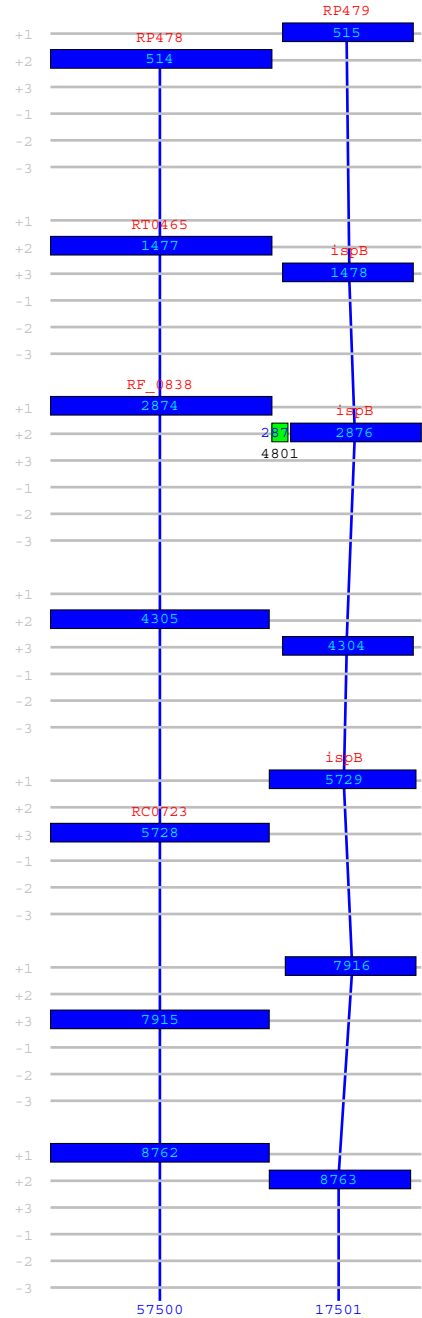



1 Rickettsia prowazekii str. Madrid E, complete genome  
 2 Rickettsia typhi str. wilmington, complete genome  
 3 Rickettsia felis URRWXCal2, complete genome  
 4 Rickettsia akari str. Hartford chromosome, whole genome shotgun sequence  
 5 Rickettsia conorii str. Malish 7, complete genome  
 6 Rickettsia sibirica 246 rsib\_agnrct, whole genome shotgun sequence  
 7 Rickettsia rickettsii chromosome, whole genome shotgun sequence

Reg\_id: 396

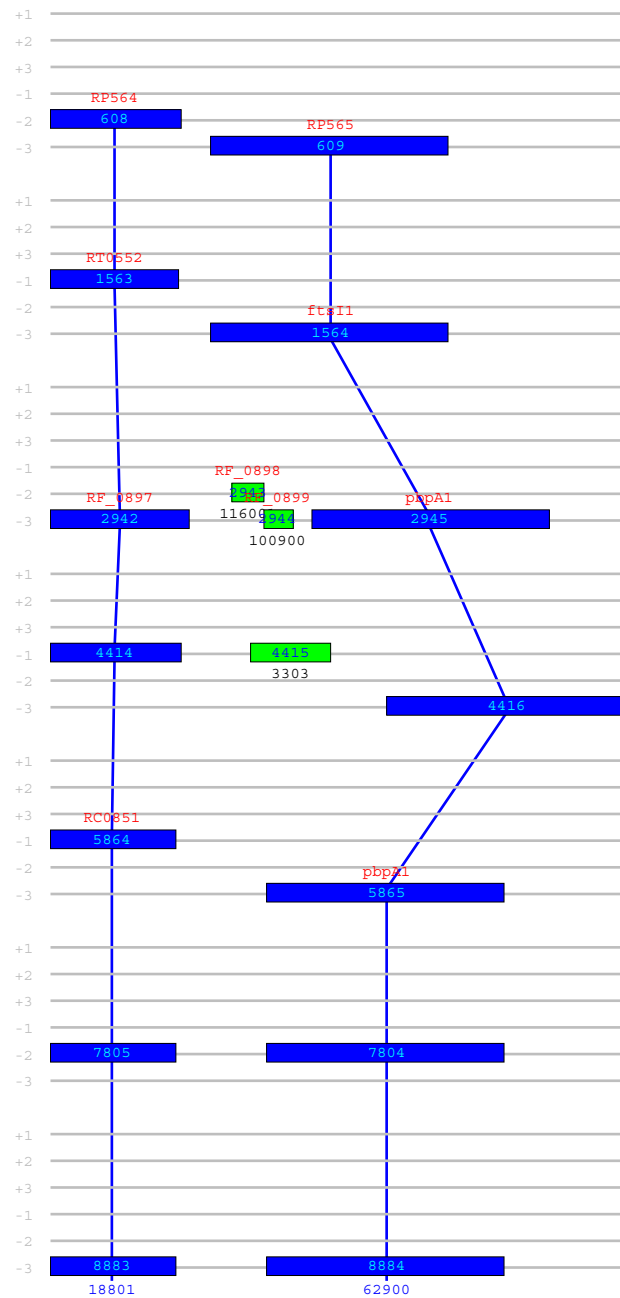

1 Rickettsia prowazekii str. Madrid E, complete genome  
 2 Rickettsia typhi str. wilmington, complete genome  
 3 Rickettsia felis URRWXCal2, complete genome  
 4 Rickettsia akari str. Hartford chromosome, whole genome shotgun sequence  
 5 Rickettsia conorii str. Malish 7, complete genome  
 6 Rickettsia sibirica 246 rsib\_agnrcr, whole genome shotgun sequence  
 7 Rickettsia rickettsii chromosome, whole genome shotgun sequence

Reg\_id: 397

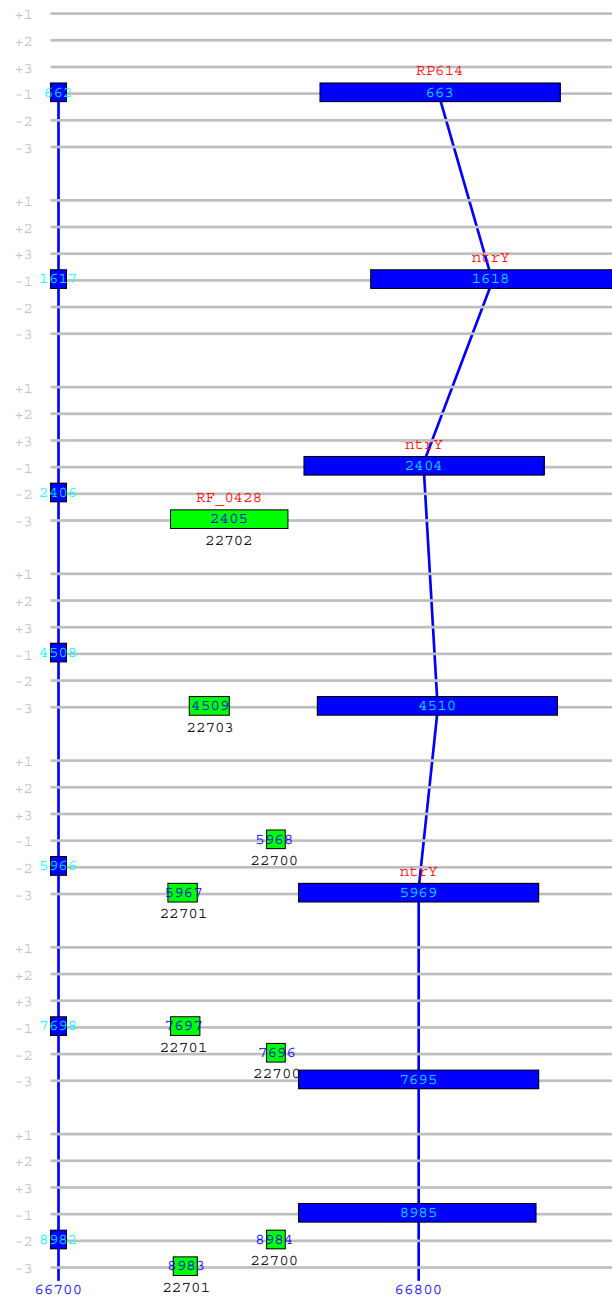

1 Rickettsia prowazekii str. Madrid E, complete genome  
 2 Rickettsia typhi str. wilmington, complete genome  
 3 Rickettsia felis URRWXCal2, complete genome  
 4 Rickettsia akari str. Hartford chromosome, whole genome shotgun sequence  
 5 Rickettsia conorii str. Malish 7, complete genome  
 6 Rickettsia sibirica 246 rsib\_agnrcr, whole genome shotgun sequence  
 7 Rickettsia rickettsii chromosome, whole genome shotgun sequence

Reg\_id: 398

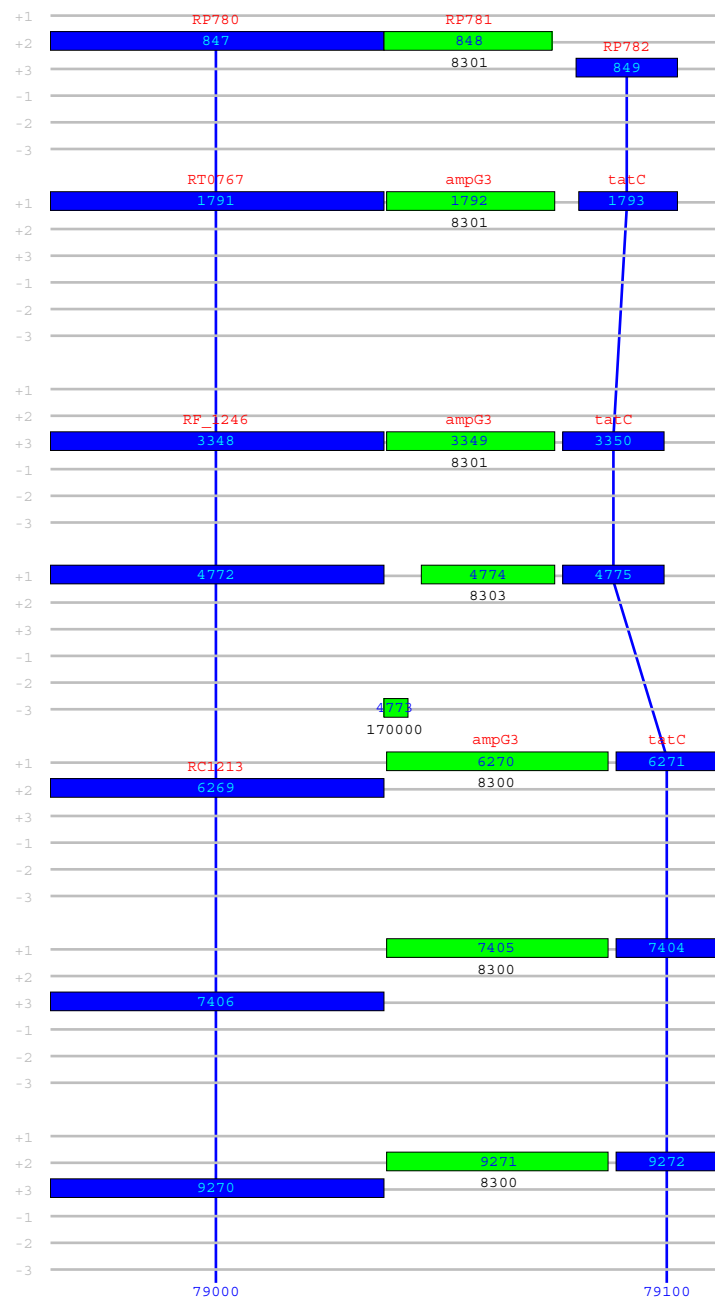

- 1 Rickettsia prowazekii str. Madrid E, complete genome
- 2 Rickettsia typhi str. wilmington, complete genome
- 3 Rickettsia felis URRWXCal2, complete genome
- 4 Rickettsia akari str. Hartford chromosome, whole genome shotgun sequence
- 5 Rickettsia conorii str. Malish 7, complete genome
- 6 Rickettsia sibirica 246 rsib\_agnrcr, whole genome shotgun sequence
- 7 Rickettsia rickettsii chromosome, whole genome shotgun sequence

Reg\_id: 400

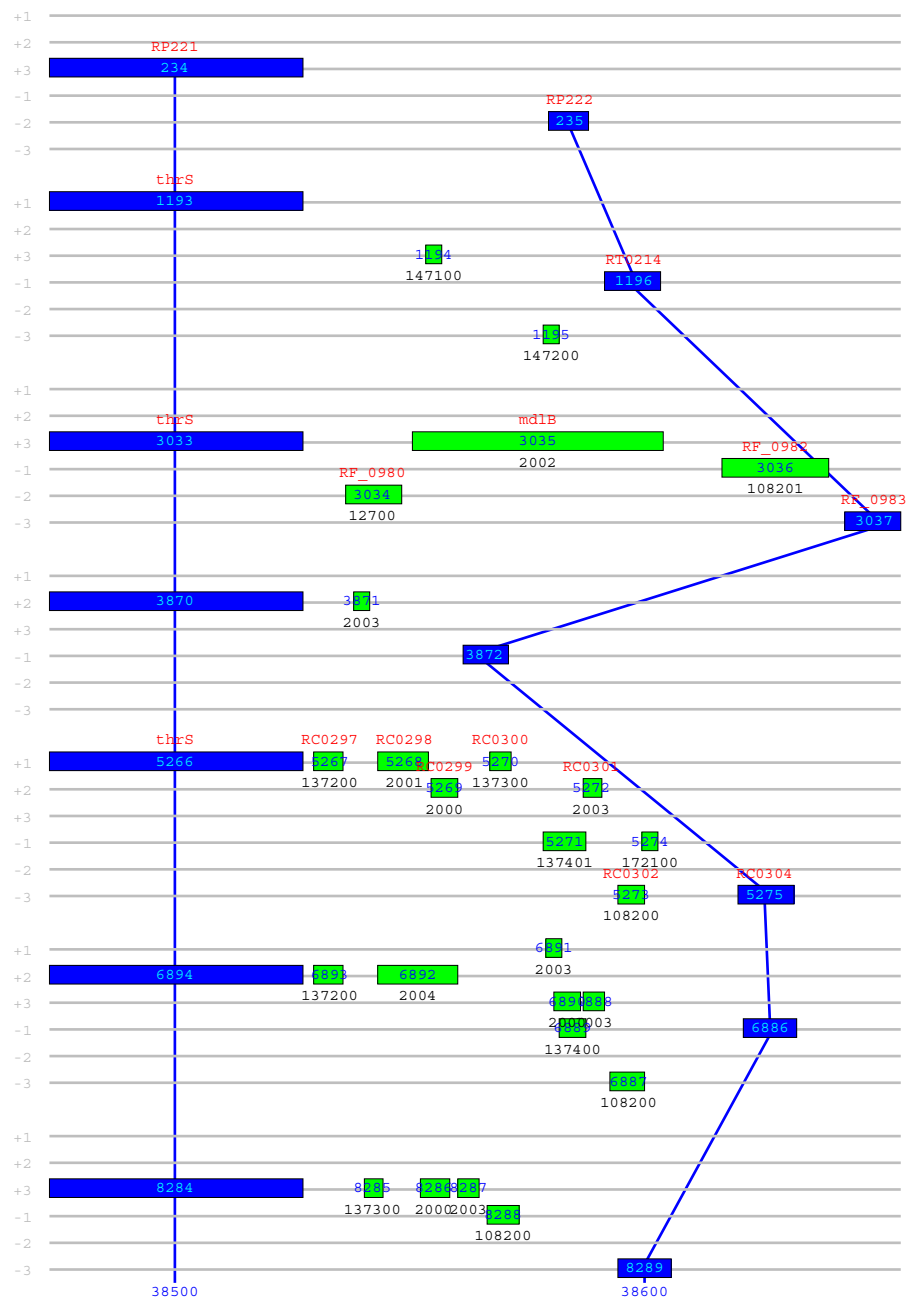

1 Rickettsia prowazekii str. Madrid E, complete genome  
 2 Rickettsia typhi str. wilmington, complete genome  
 3 Rickettsia felis URRWXCal2, complete genome  
 4 Rickettsia akari str. Hartford chromosome, whole genome shotgun sequence  
 5 Rickettsia conorii str. Malish 7, complete genome  
 6 Rickettsia sibirica 246 rsib\_agnrct, whole genome shotgun sequence  
 7 Rickettsia rickettsii chromosome, whole genome shotgun sequence

Reg\_id: 401

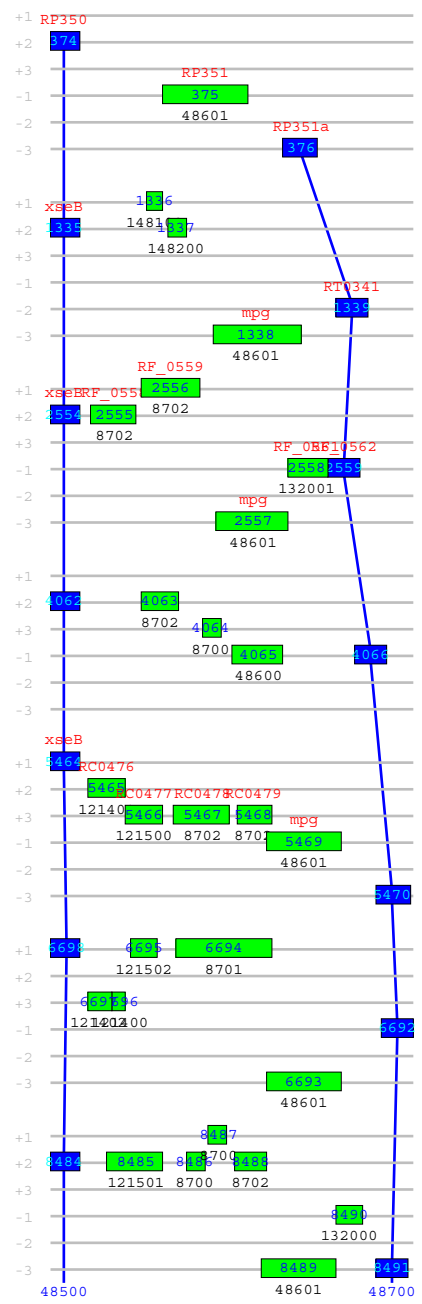

1 Rickettsia prowazekii str. Madrid E, complete genome  
 2 Rickettsia typhi str. wilmington, complete genome  
 3 Rickettsia felis URRWXCal2, complete genome  
 4 Rickettsia akari str. Hartford chromosome, whole genome shotgun sequence  
 5 Rickettsia conorii str. Malish 7, complete genome  
 6 Rickettsia sibirica 246 rsib\_agnrcr, whole genome shotgun sequence  
 7 Rickettsia rickettsii chromosome, whole genome shotgun sequence

Reg\_id: 403

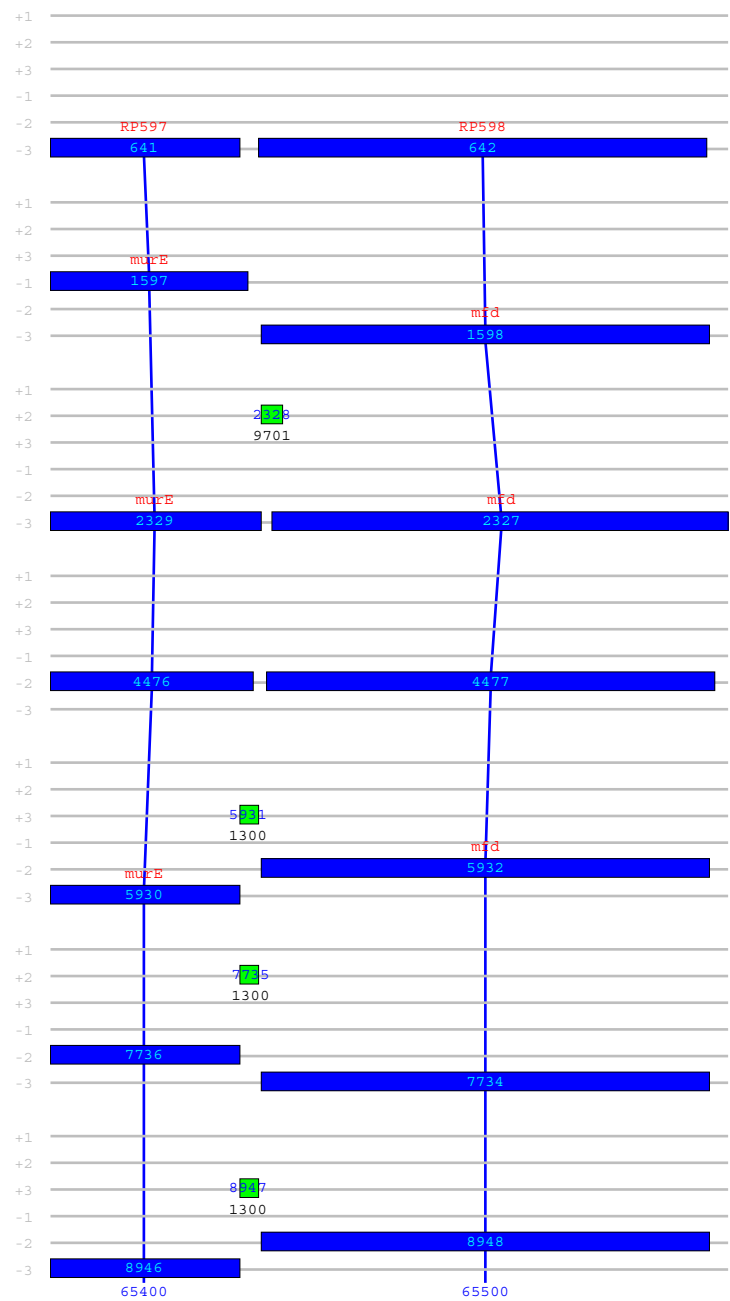

1 Rickettsia prowazekii str. Madrid E, complete genome  
 2 Rickettsia typhi str. wilmington, complete genome  
 3 Rickettsia felis URRWXCal2, complete genome  
 4 Rickettsia akari str. Hartford chromosome, whole genome shotgun sequence  
 5 Rickettsia conorii str. Malish 7, complete genome  
 6 Rickettsia sibirica 246 rsib agncrt, whole genome shotgun sequence  
 7 Rickettsia rickettsii chromosome, whole genome shotgun sequence

Reg\_id: 404

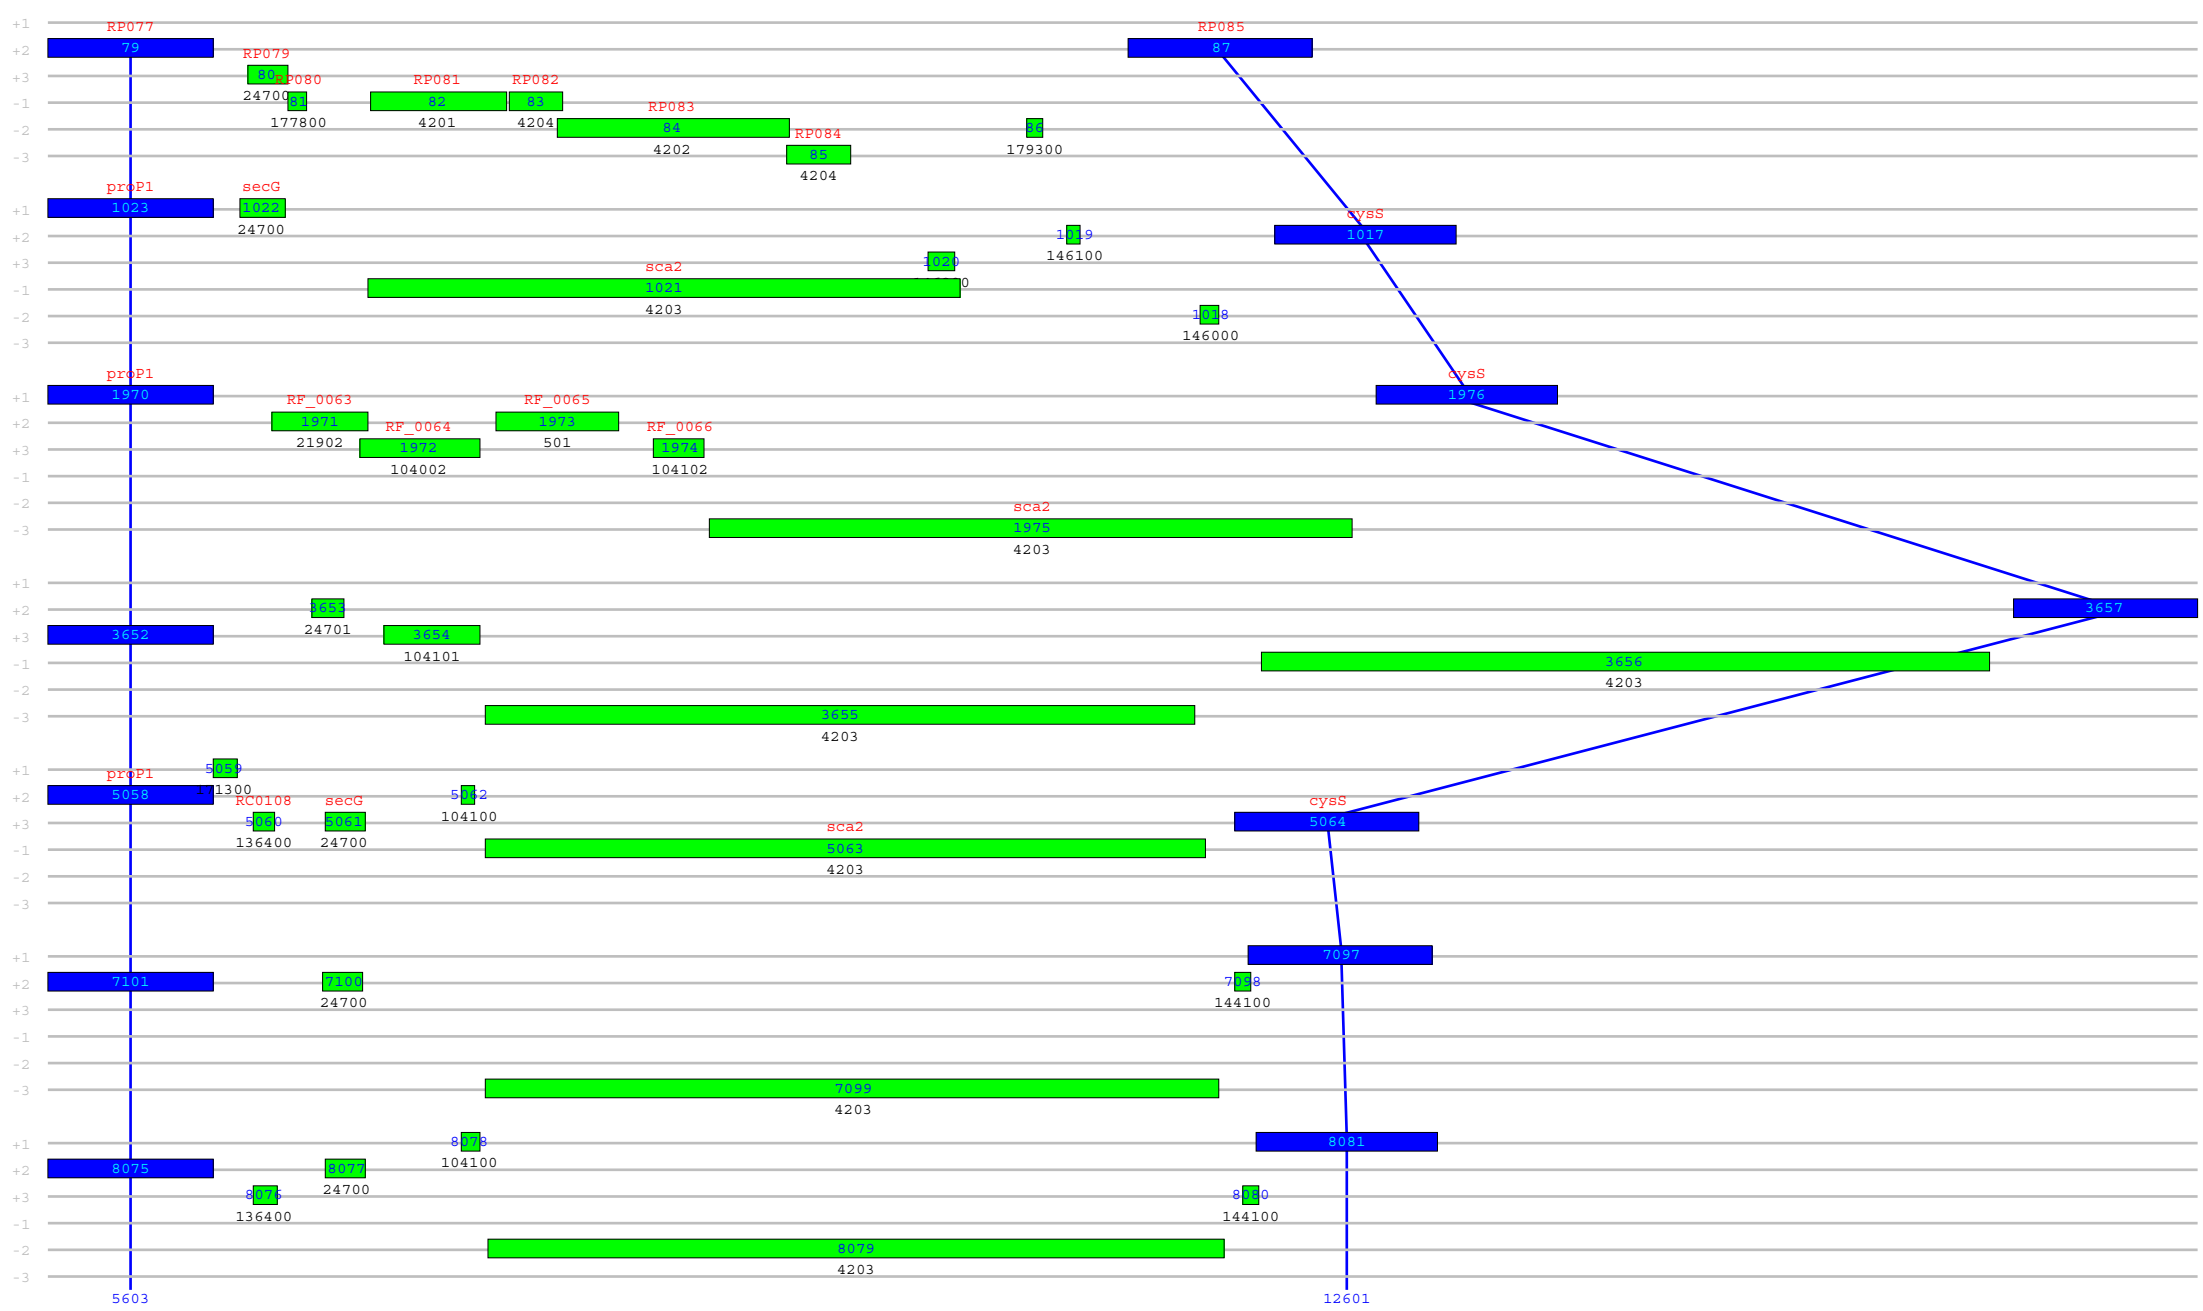

1 Rickettsia prowazekii str. Madrid E, complete genome  
 2 Rickettsia typhi str. wilmington, complete genome  
 3 Rickettsia felis URRWXCal2, complete genome  
 4 Rickettsia akari str. Hartford chromosome, whole genome shotgun sequence  
 5 Rickettsia conorii str. Malish 7, complete genome  
 6 Rickettsia sibirica 246 rsib\_agnrcr, whole genome shotgun sequence  
 7 Rickettsia rickettsii chromosome, whole genome shotgun sequence

Reg\_id: 412

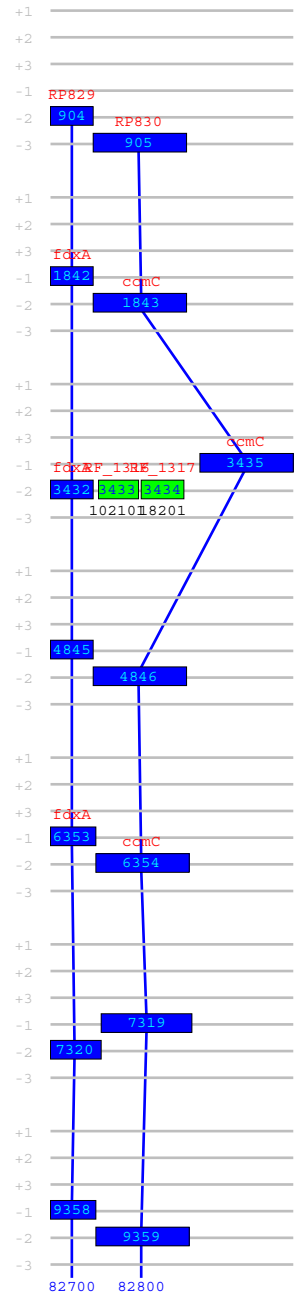



1 Rickettsia prowazekii str. Madrid E, complete genome  
 2 Rickettsia typhi str. wilmington, complete genome  
 3 Rickettsia felis URRWXCal2, complete genome  
 4 Rickettsia akari str. Hartford chromosome, whole genome shotgun sequence  
 5 Rickettsia conorii str. Malish 7, complete genome  
 6 Rickettsia sibirica 246 rsib\_agnrcr, whole genome shotgun sequence  
 7 Rickettsia rickettsii chromosome, whole genome shotgun sequence

Reg\_id: 415

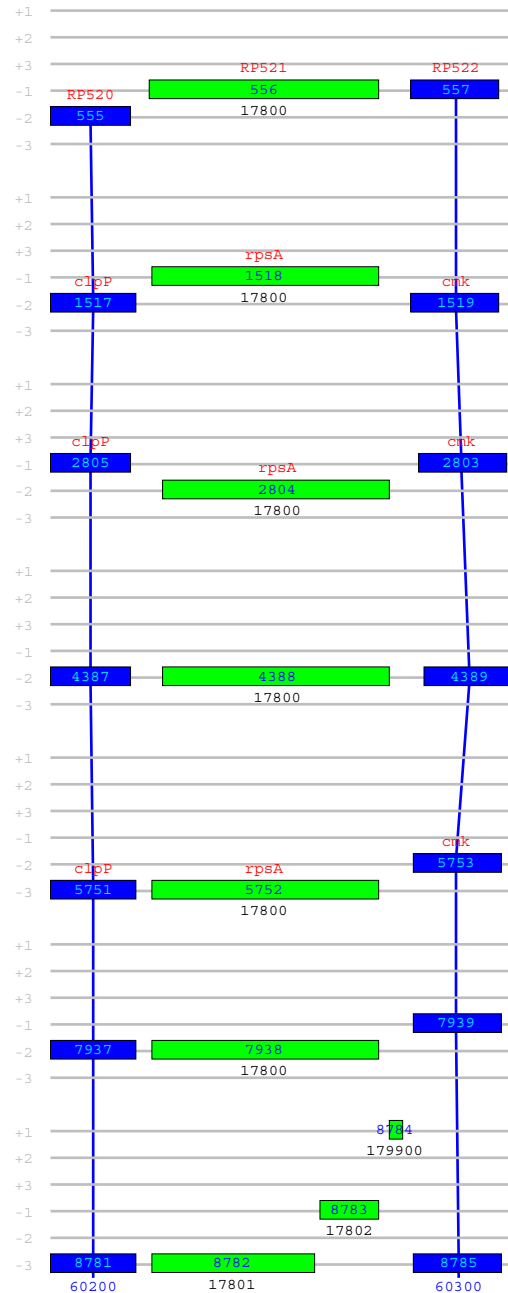

- 1 Rickettsia prowazekii str. Madrid E, complete genome
- 2 Rickettsia typhi str. wilmington, complete genome
- 3 Rickettsia felis URRWXCal2, complete genome
- 4 Rickettsia akari str. Hartford chromosome, whole genome shotgun sequence
- 5 Rickettsia conorii str. Malish 7, complete genome
- 6 Rickettsia sibirica 246 rsib\_agncrt, whole genome shotgun sequence
- 7 Rickettsia rickettsii chromosome, whole genome shotgun sequence

Reg\_id: 416

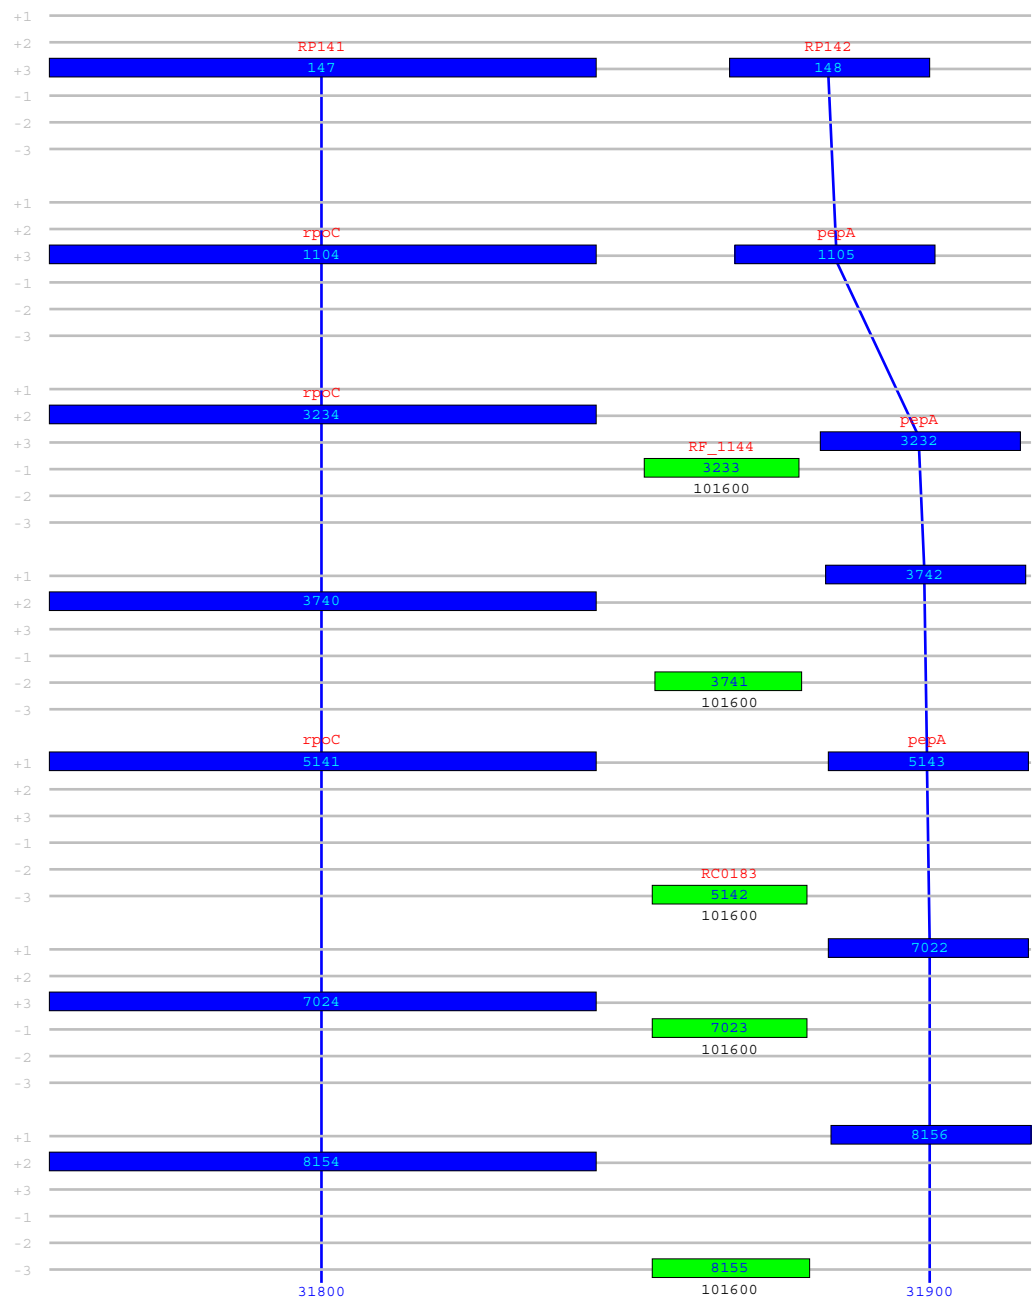

- 1 Rickettsia prowazekii str. Madrid E, complete genome
- 2 Rickettsia typhi str. wilmington, complete genome
- 3 Rickettsia felis URRWXCal2, complete genome
- 4 Rickettsia akari str. Hartford chromosome, whole genome shotgun sequence
- 5 Rickettsia conorii str. Malish 7, complete genome
- 6 Rickettsia sibirica 246 rsib\_agnrcr, whole genome shotgun sequence
- 7 Rickettsia rickettsii chromosome, whole genome shotgun sequence

Reg\_id: 418

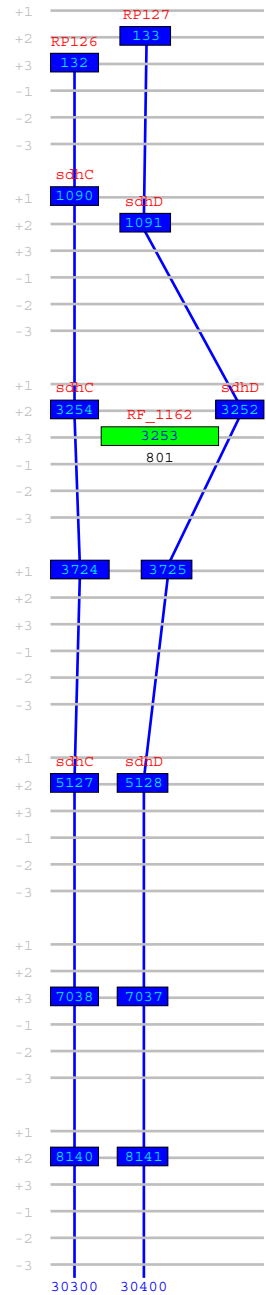

1 Rickettsia prowazekii str. Madrid E, complete genome  
 2 Rickettsia typhi str. wilmington, complete genome  
 3 Rickettsia felis URRWXCal2, complete genome  
 4 Rickettsia akari str. Hartford chromosome, whole genome shotgun sequence  
 5 Rickettsia conorii str. Malish 7, complete genome  
 6 Rickettsia sibirica 246 rsib\_agnrcr, whole genome shotgun sequence  
 7 Rickettsia rickettsii chromosome, whole genome shotgun sequence

Reg\_id: 420

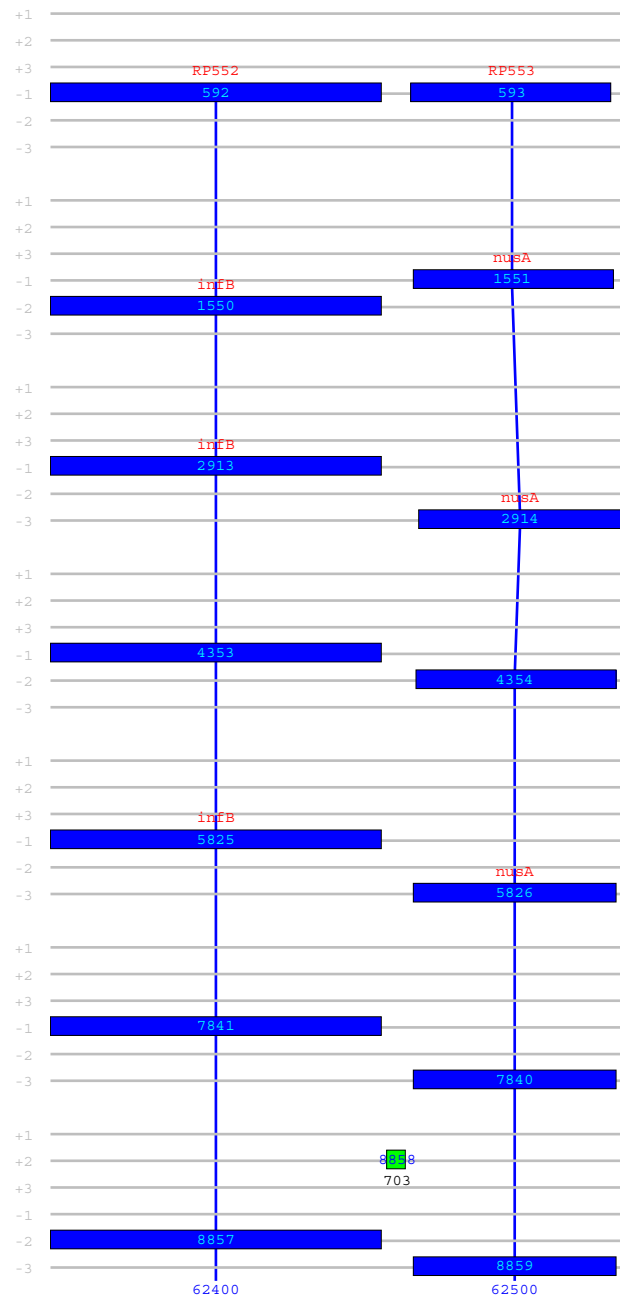

1 Rickettsia prowazekii str. Madrid E, complete genome  
 2 Rickettsia typhi str. wilmington, complete genome  
 3 Rickettsia felis URRWXCal2, complete genome  
 4 Rickettsia akari str. Hartford chromosome, whole genome shotgun sequence  
 5 Rickettsia conorii str. Malish 7, complete genome  
 6 Rickettsia sibirica 246 rsib\_agnrcr, whole genome shotgun sequence  
 7 Rickettsia rickettsii chromosome, whole genome shotgun sequence

Reg\_id: 421

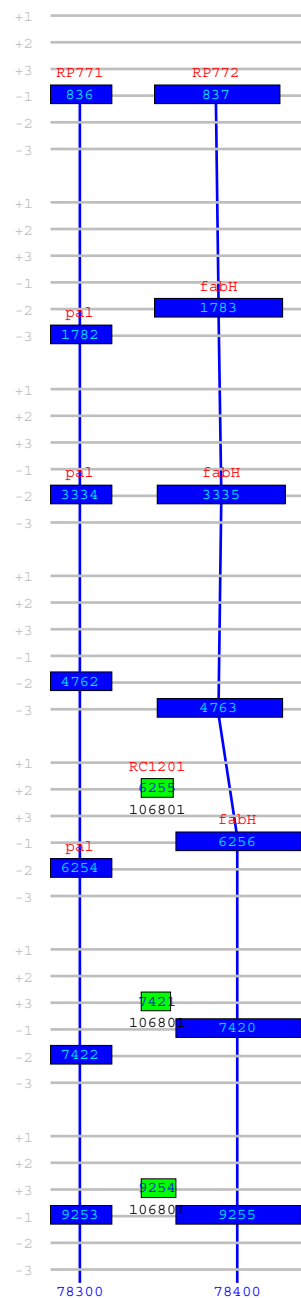

1 Rickettsia prowazekii str. Madrid E, complete genome  
 2 Rickettsia typhi str. wilmington, complete genome  
 3 Rickettsia felis URRWXCal2, complete genome  
 4 Rickettsia akari str. Hartford chromosome, whole genome shotgun sequence  
 5 Rickettsia conorii str. Malish 7, complete genome  
 6 Rickettsia sibirica 246 rsib agncrt, whole genome shotgun sequence  
 7 Rickettsia rickettsii chromosome, whole genome shotgun sequence

Reg\_id: 422

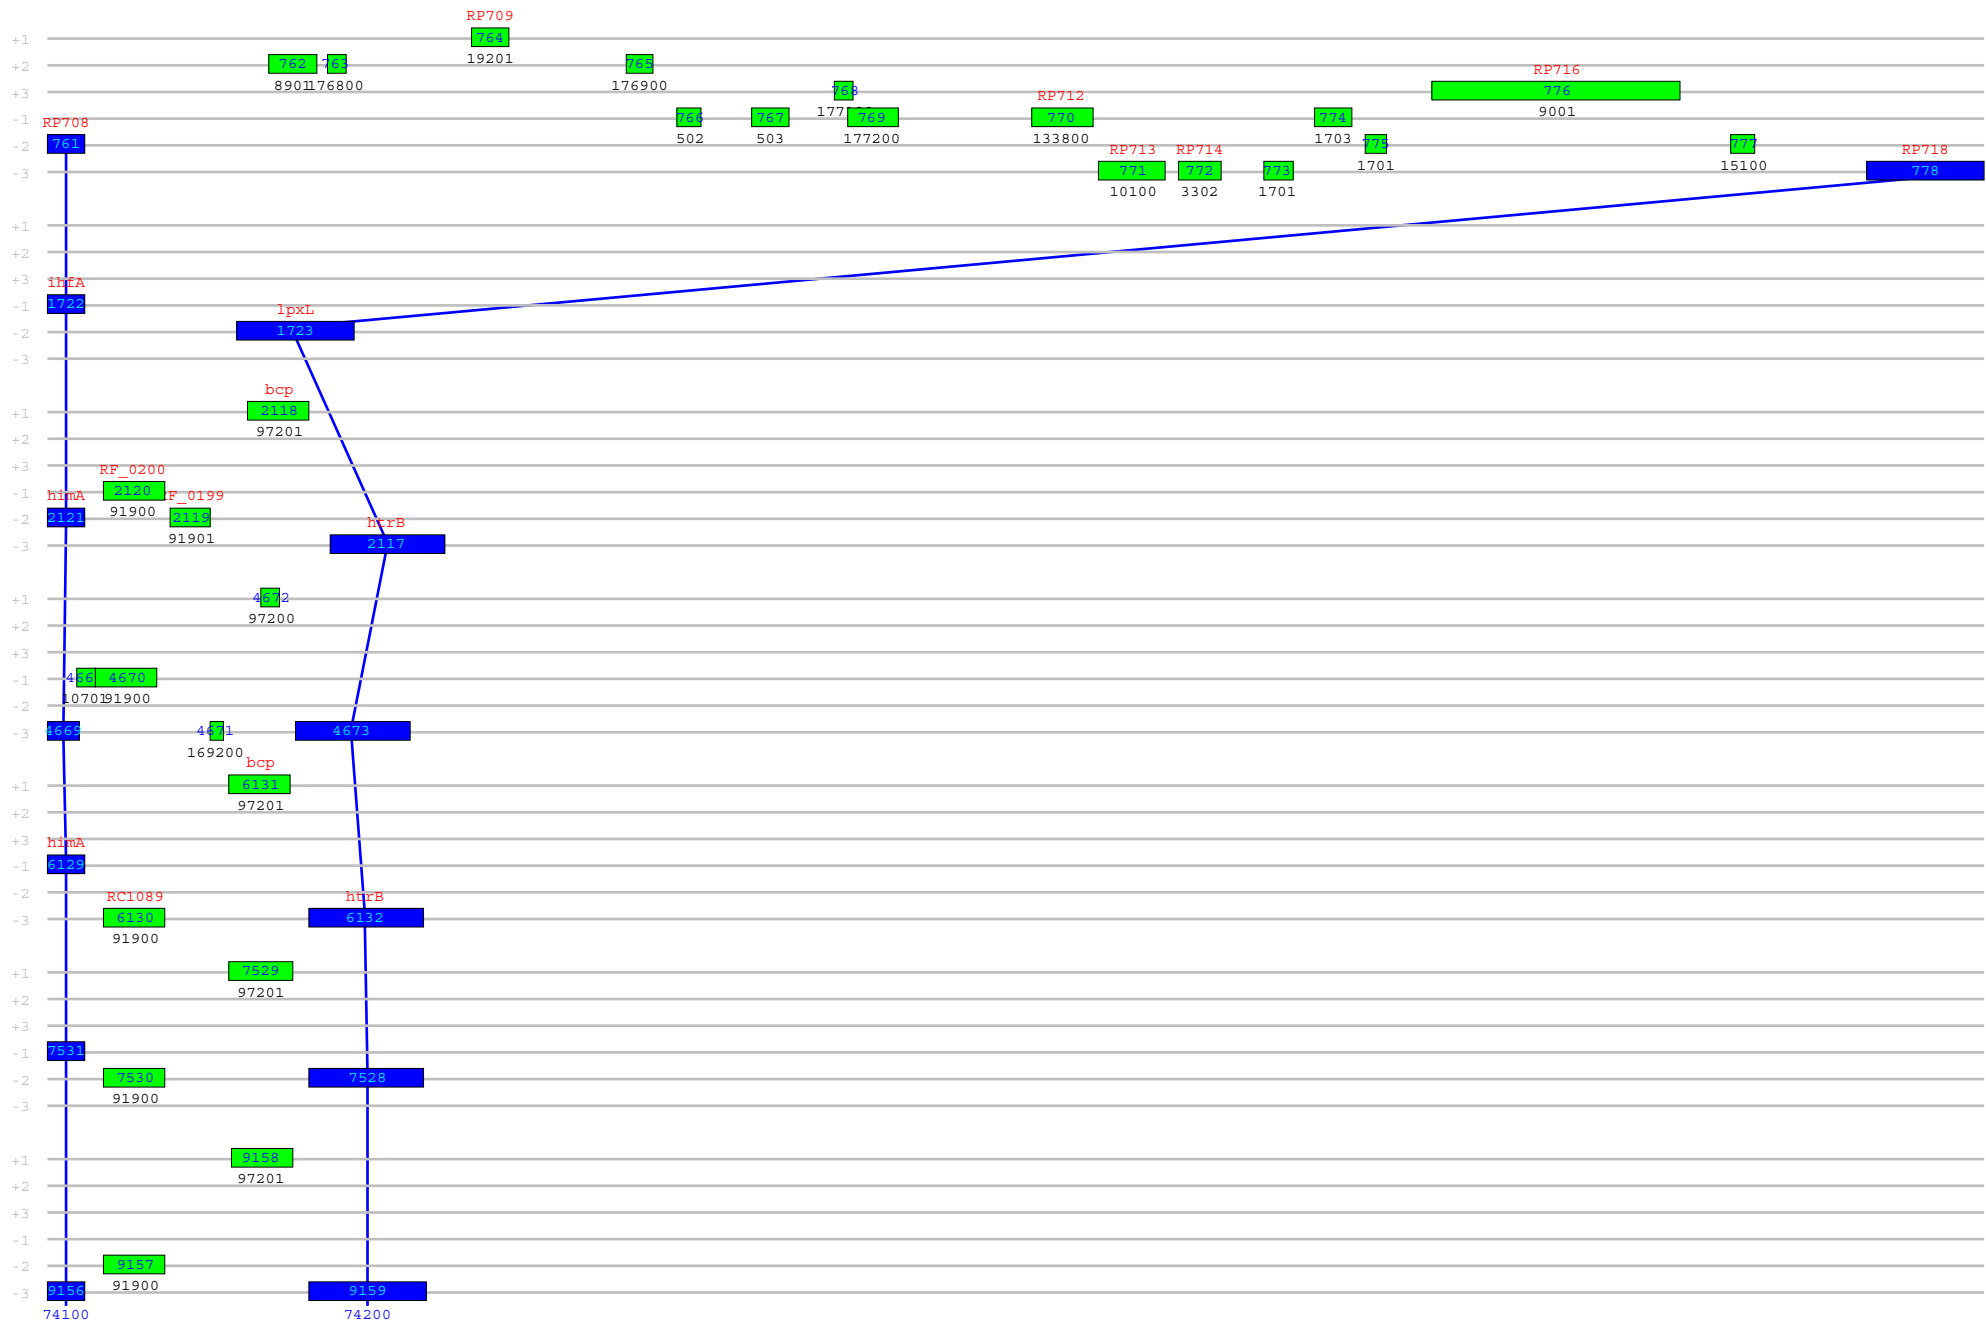

1 Rickettsia prowazekii str. Madrid E, complete genome  
 2 Rickettsia typhi str. wilmington, complete genome  
 3 Rickettsia felis URRWXCal2, complete genome  
 4 Rickettsia akari str. Hartford chromosome, whole genome shotgun sequence  
 5 Rickettsia conorii str. Malish 7, complete genome  
 6 Rickettsia sibirica 246 rsib\_agnrcr, whole genome shotgun sequence  
 7 Rickettsia rickettsii chromosome, whole genome shotgun sequence

Reg\_id: 426

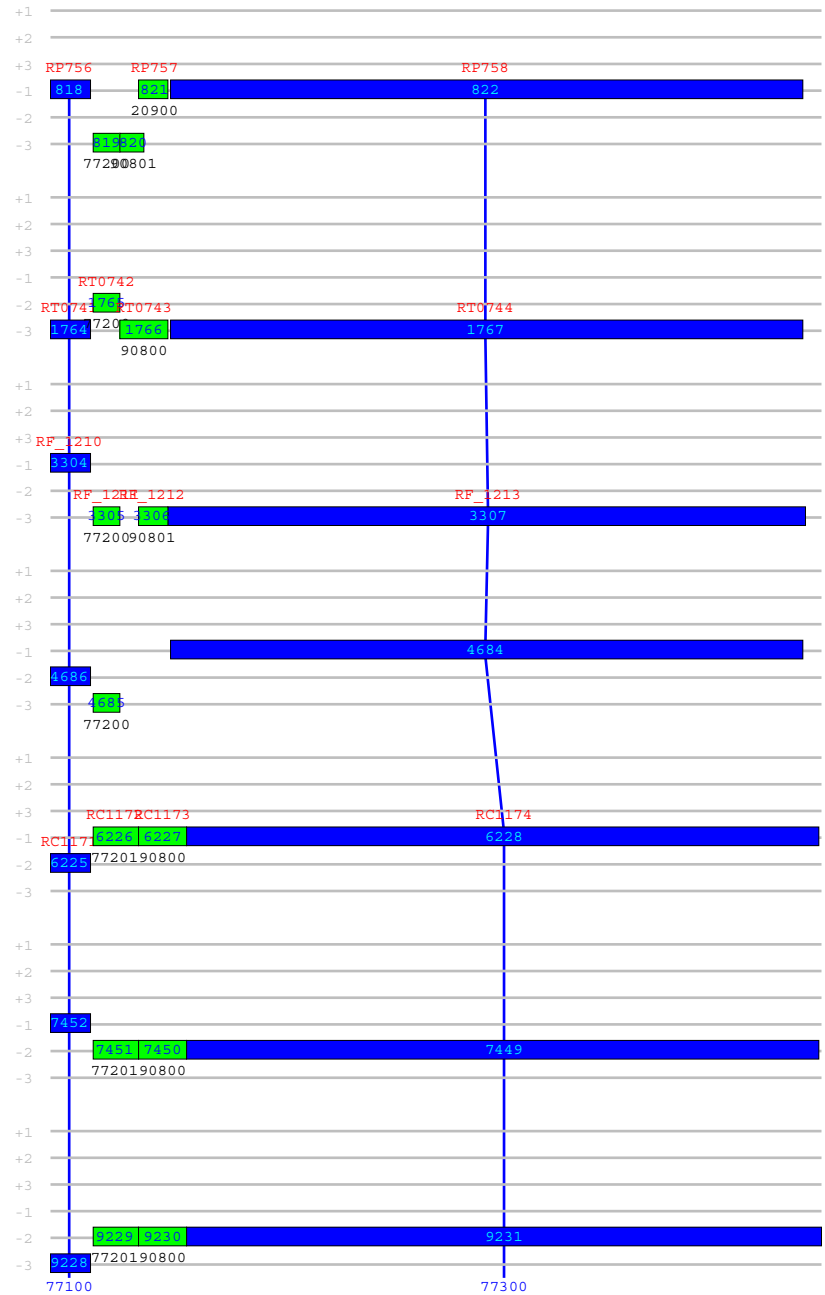

- 1 Rickettsia prowazekii str. Madrid E, complete genome
- 2 Rickettsia typhi str. wilmington, complete genome
- 3 Rickettsia felis URRWXCal2, complete genome
- 4 Rickettsia akari str. Hartford chromosome, whole genome shotgun sequence
- 5 Rickettsia conorii str. Malish 7, complete genome
- 6 Rickettsia sibirica 246 rsib\_agnrcr, whole genome shotgun sequence
- 7 Rickettsia rickettsii chromosome, whole genome shotgun sequence

Reg\_id: 427

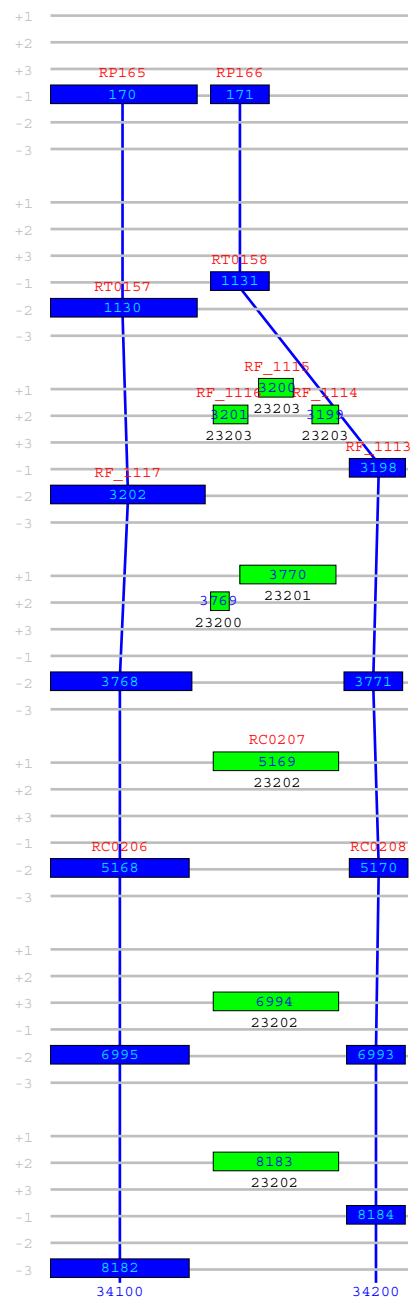



1 Rickettsia prowazekii str. Madrid E, complete genome  
 2 Rickettsia typhi str. wilmington, complete genome  
 3 Rickettsia felis URRWXCal2, complete genome  
 4 Rickettsia akari str. Hartford chromosome, whole genome shotgun sequence  
 5 Rickettsia conorii str. Malish 7, complete genome  
 6 Rickettsia sibirica 246 rsib\_agnrcr, whole genome shotgun sequence  
 7 Rickettsia rickettsii chromosome, whole genome shotgun sequence

Reg\_id: 431

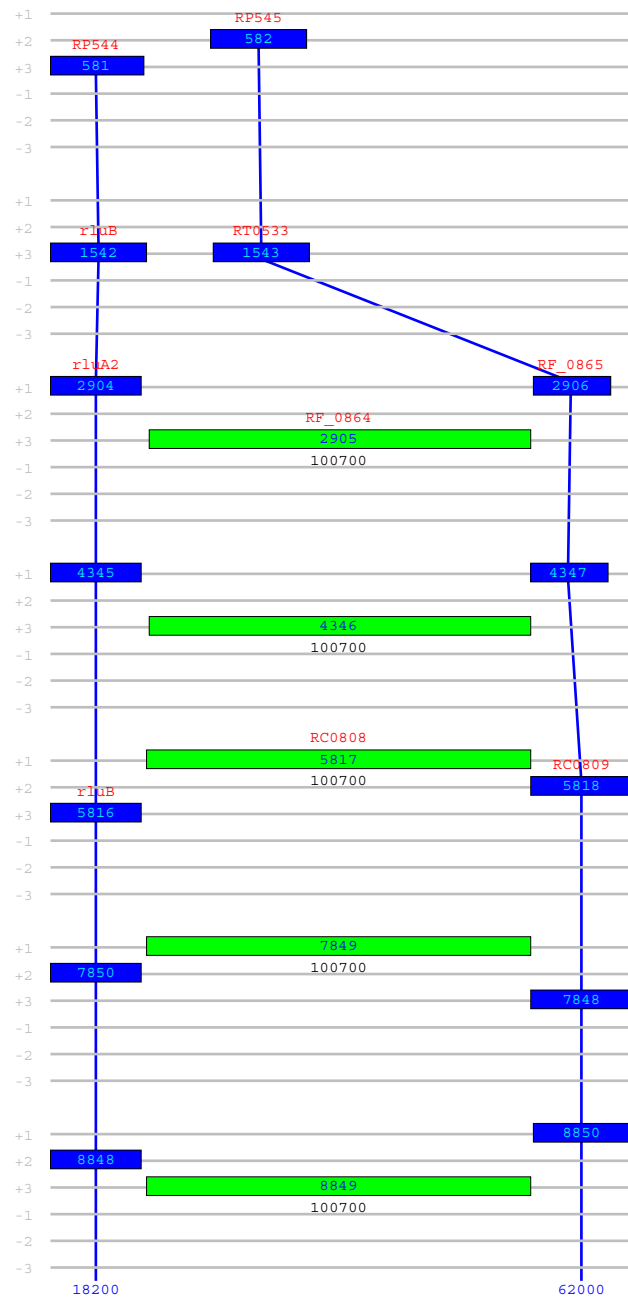



1 Rickettsia prowazekii str. Madrid E, complete genome  
 2 Rickettsia typhi str. wilmington, complete genome  
 3 Rickettsia felis URRWXCal2, complete genome  
 4 Rickettsia akari str. Hartford chromosome, whole genome shotgun sequence  
 5 Rickettsia conorii str. Malish 7, complete genome  
 6 Rickettsia sibirica 246 rsib\_agnrcr, whole genome shotgun sequence  
 7 Rickettsia rickettsii chromosome, whole genome shotgun sequence

Reg\_id: 434

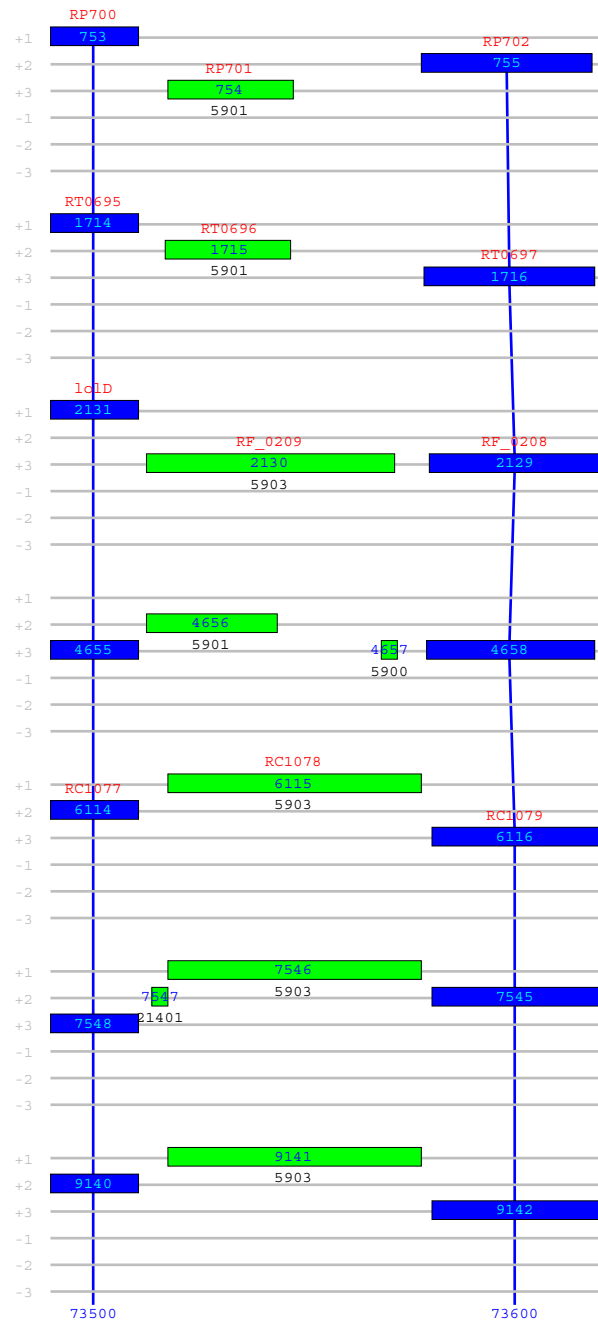

1 Rickettsia prowazekii str. Madrid E, complete genome  
 2 Rickettsia typhi str. wilmington, complete genome  
 3 Rickettsia felis URRWXCal2, complete genome  
 4 Rickettsia akari str. Hartford chromosome, whole genome shotgun sequence  
 5 Rickettsia conorii str. Malish 7, complete genome  
 6 Rickettsia sibirica 246 rsib\_agnrct, whole genome shotgun sequence  
 7 Rickettsia rickettsii chromosome, whole genome shotgun sequence

Reg\_id: 435

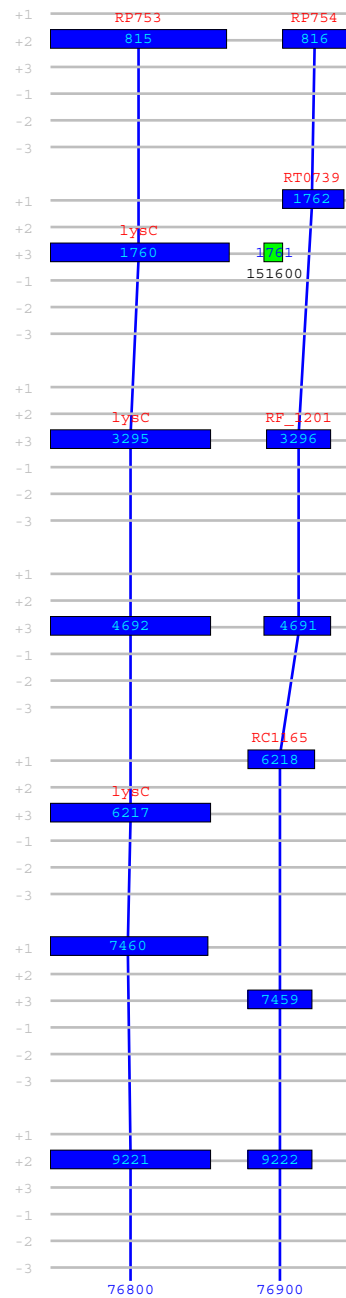

- 1 Rickettsia prowazekii str. Madrid E, complete genome
- 2 Rickettsia typhi str. wilmington, complete genome
- 3 Rickettsia felis URRWXCal2, complete genome
- 4 Rickettsia akari str. Hartford chromosome, whole genome shotgun sequence
- 5 Rickettsia conorii str. Malish 7, complete genome
- 6 Rickettsia sibirica 246 rsib\_agnrcr, whole genome shotgun sequence
- 7 Rickettsia rickettsii chromosome, whole genome shotgun sequence

Reg\_id: 436

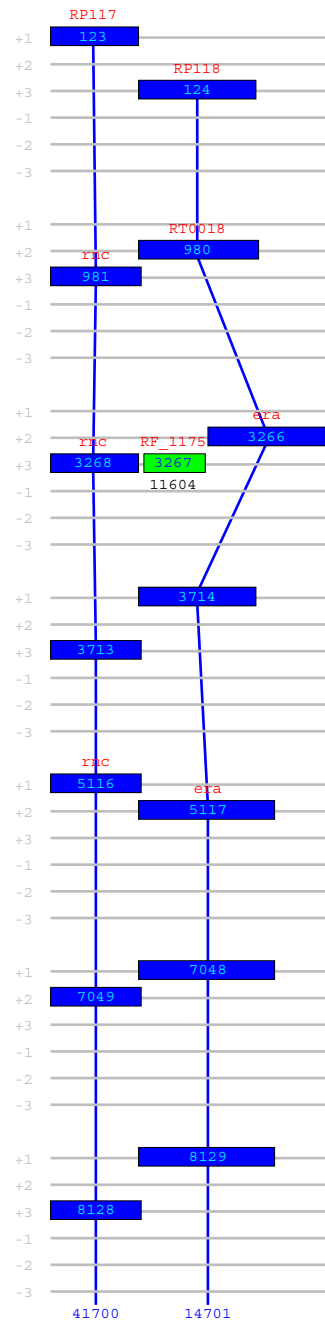

1 Rickettsia prowazekii str. Madrid E, complete genome  
 2 Rickettsia typhi str. wilmington, complete genome  
 3 Rickettsia felis URRWXCal2, complete genome  
 4 Rickettsia akari str. Hartford chromosome, whole genome shotgun sequence  
 5 Rickettsia conorii str. Malish 7, complete genome  
 6 Rickettsia sibirica 246 rsib\_agnrcr, whole genome shotgun sequence  
 7 Rickettsia rickettsii chromosome, whole genome shotgun sequence

Reg\_id: 437

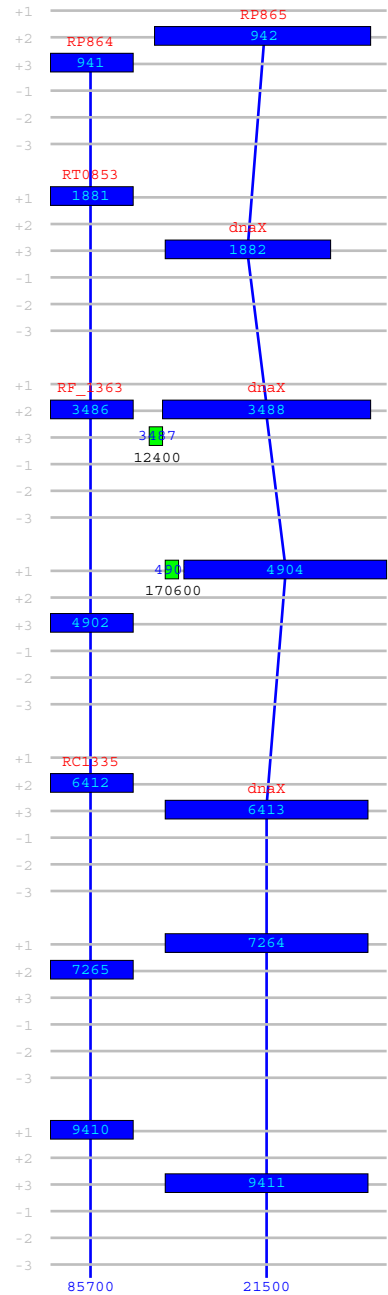

- 1 Rickettsia prowazekii str. Madrid E, complete genome
- 2 Rickettsia typhi str. wilmington, complete genome
- 3 Rickettsia felis URRWXCal2, complete genome
- 4 Rickettsia akari str. Hartford chromosome, whole genome shotgun sequence
- 5 Rickettsia conorii str. Malish 7, complete genome
- 6 Rickettsia sibirica 246 rsib\_agnrct, whole genome shotgun sequence
- 7 Rickettsia rickettsii chromosome, whole genome shotgun sequence

Reg\_id: 439

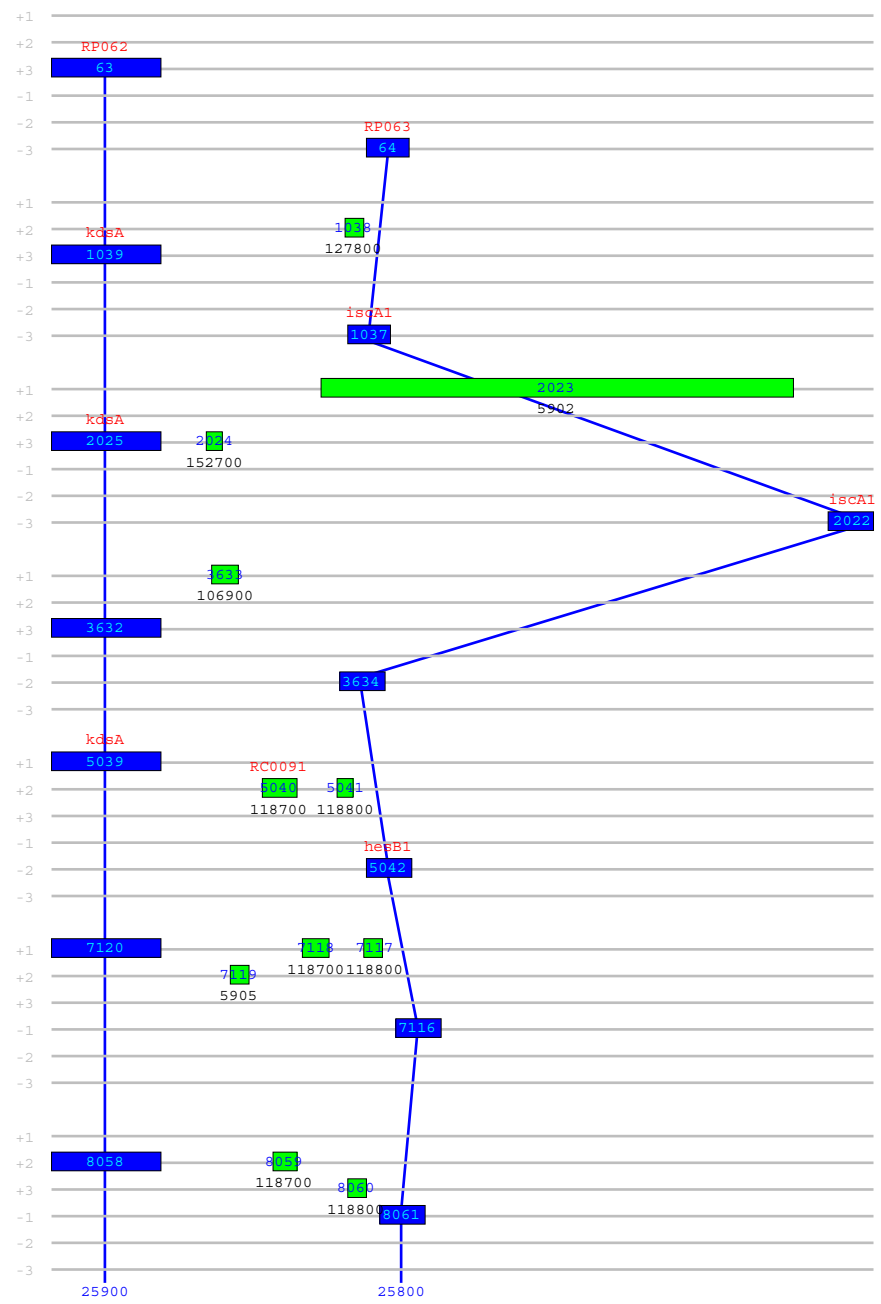

1 Rickettsia prowazekii str. Madrid E, complete genome  
 2 Rickettsia typhi str. wilmington, complete genome  
 3 Rickettsia felis URRWXCal2, complete genome  
 4 Rickettsia akari str. Hartford chromosome, whole genome shotgun sequence  
 5 Rickettsia conorii str. Malish 7, complete genome  
 6 Rickettsia sibirica 246 rsib\_agnrcr, whole genome shotgun sequence  
 7 Rickettsia rickettsii chromosome, whole genome shotgun sequence

Reg\_id: 440

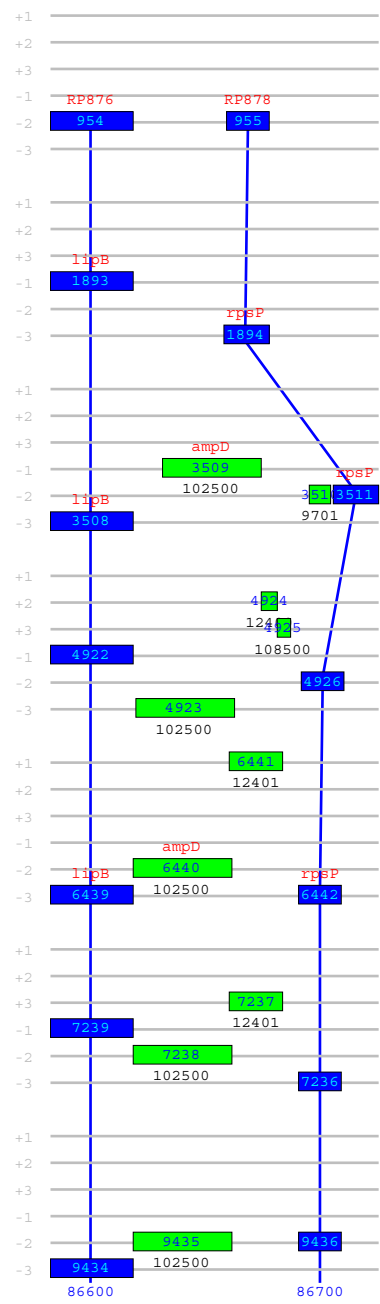



1 Rickettsia prowazekii str. Madrid E, complete genome  
 2 Rickettsia typhi str. wilmington, complete genome  
 3 Rickettsia felis URRWXCal2, complete genome  
 4 Rickettsia akari str. Hartford chromosome, whole genome shotgun sequence  
 5 Rickettsia conorii str. Malish 7, complete genome  
 6 Rickettsia sibirica 246 rsib\_agnrct, whole genome shotgun sequence  
 7 Rickettsia rickettsii chromosome, whole genome shotgun sequence

Reg\_id: 442

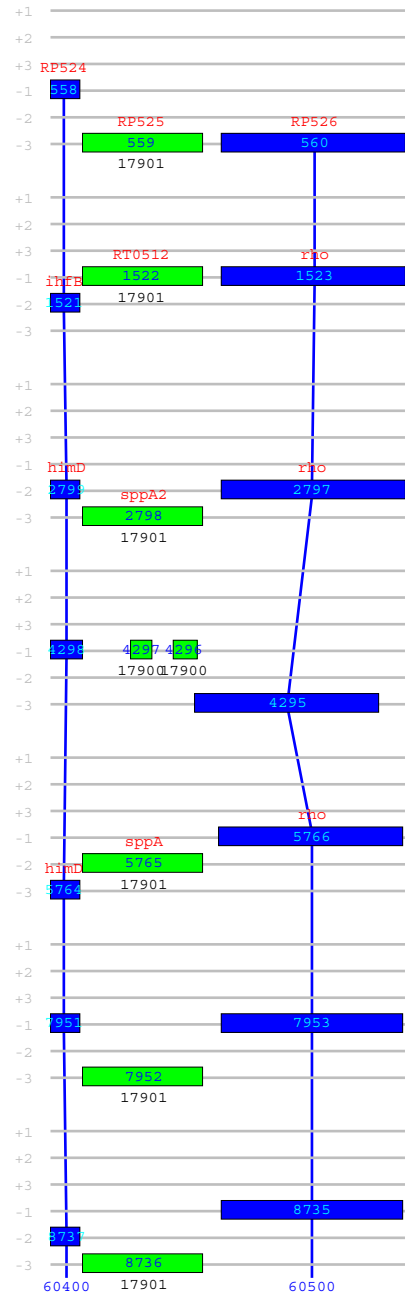

1 Rickettsia prowazekii str. Madrid E, complete genome  
 2 Rickettsia typhi str. wilmington, complete genome  
 3 Rickettsia felis URRWXCal2, complete genome  
 4 Rickettsia akari str. Hartford chromosome, whole genome shotgun sequence  
 5 Rickettsia conorii str. Malish 7, complete genome  
 6 Rickettsia sibirica 246 rsib\_agnrcrt, whole genome shotgun sequence  
 7 Rickettsia rickettsii chromosome, whole genome shotgun sequence

Reg\_id: 443

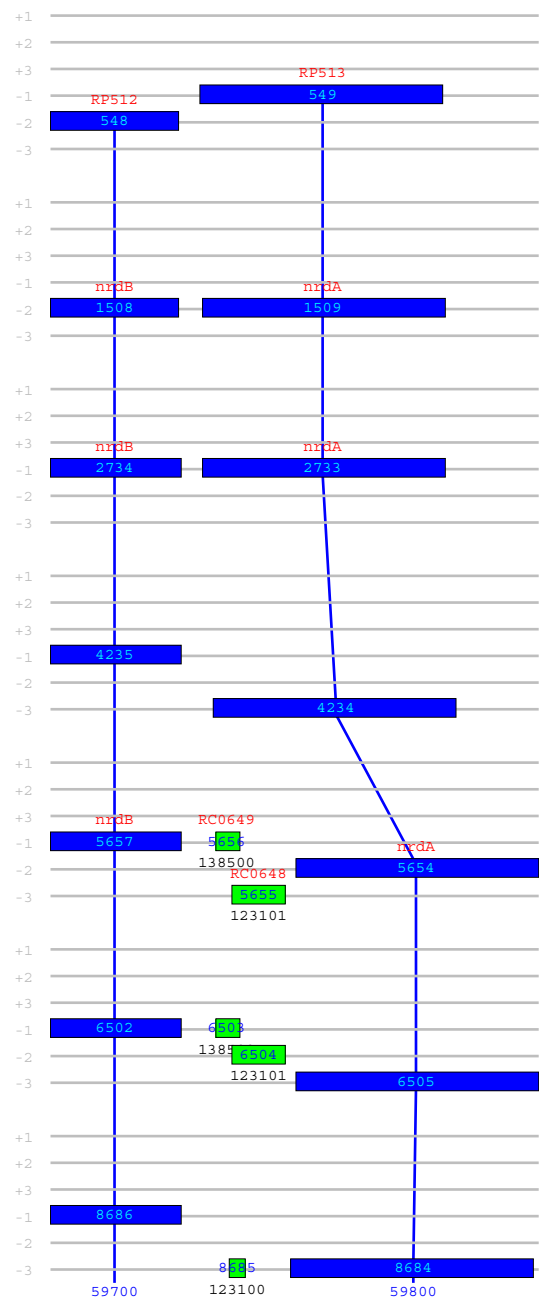

- 1 Rickettsia prowazekii str. Madrid E, complete genome
- 2 Rickettsia typhi str. wilmington, complete genome
- 3 Rickettsia felis URRWXCal2, complete genome
- 4 Rickettsia akari str. Hartford chromosome, whole genome shotgun sequence
- 5 Rickettsia conorii str. Malish 7, complete genome
- 6 Rickettsia sibirica 246 rsib\_agnrcr, whole genome shotgun sequence
- 7 Rickettsia rickettsii chromosome, whole genome shotgun sequence

Reg\_id: 447

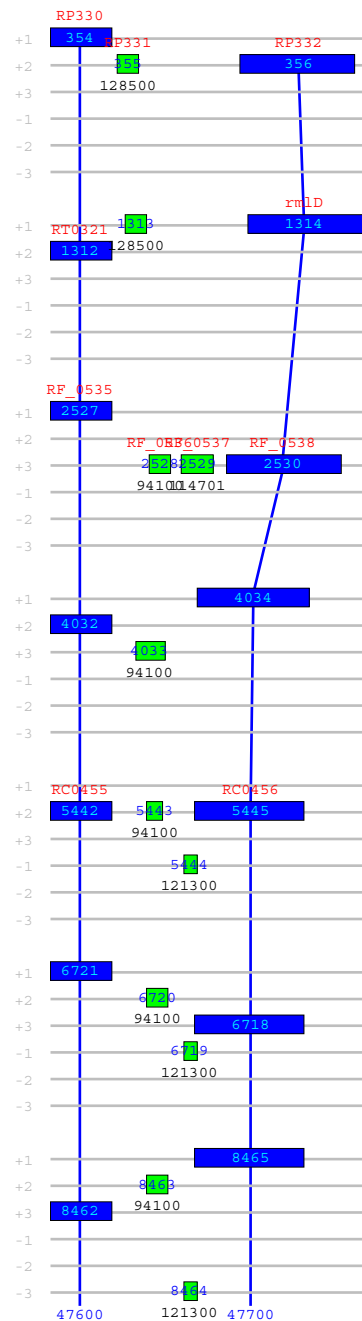

1 Rickettsia prowazekii str. Madrid E, complete genome  
 2 Rickettsia typhi str. wilmington, complete genome  
 3 Rickettsia felis URRWXCal2, complete genome  
 4 Rickettsia akari str. Hartford chromosome, whole genome shotgun sequence  
 5 Rickettsia conorii str. Malish 7, complete genome  
 6 Rickettsia sibirica 246 rsib\_agnrcr, whole genome shotgun sequence  
 7 Rickettsia rickettsii chromosome, whole genome shotgun sequence

Reg\_id: 448

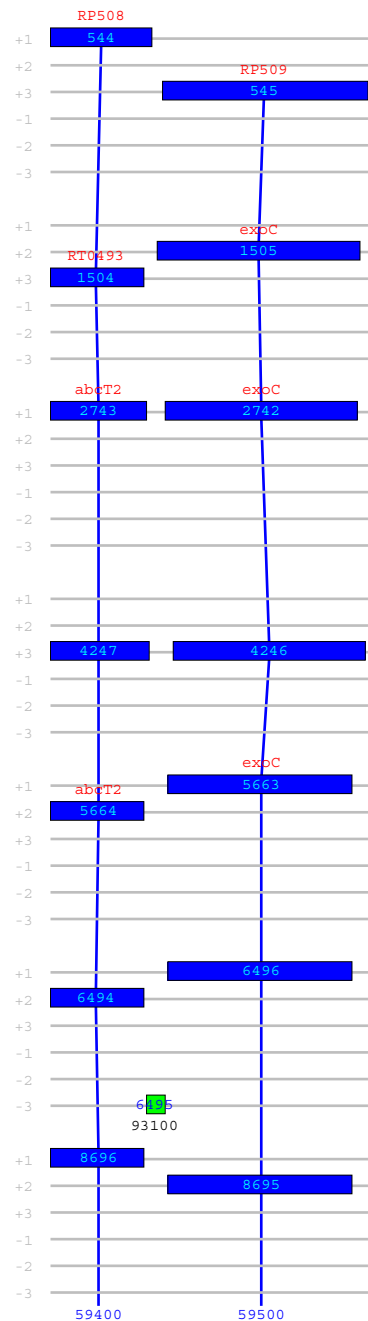

1 Rickettsia prowazekii str. Madrid E, complete genome  
 2 Rickettsia typhi str. wilmington, complete genome  
 3 Rickettsia felis URRWXCal2, complete genome  
 4 Rickettsia akari str. Hartford chromosome, whole genome shotgun sequence  
 5 Rickettsia conorii str. Malish 7, complete genome  
 6 Rickettsia sibirica 246 rsib\_agnrct, whole genome shotgun sequence  
 7 Rickettsia rickettsii chromosome, whole genome shotgun sequence

Reg\_id: 451

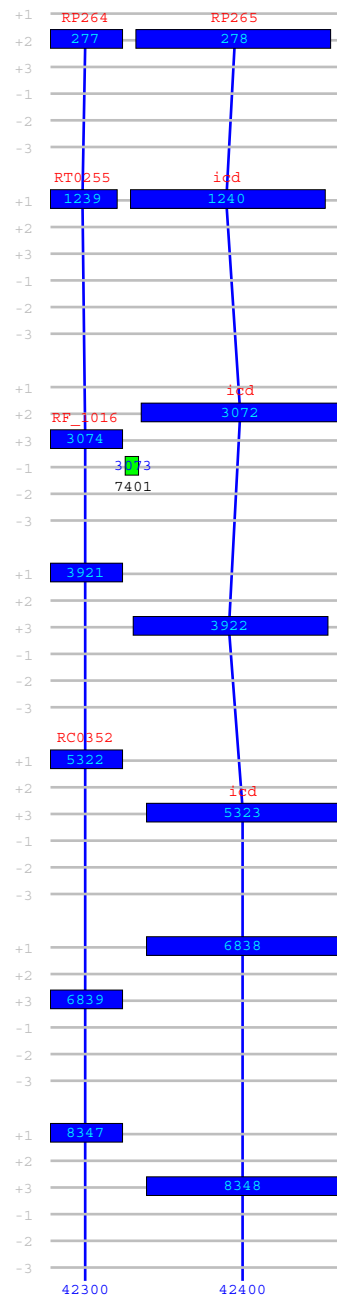

1 Rickettsia prowazekii str. Madrid E, complete genome  
 2 Rickettsia typhi str. wilmington, complete genome  
 3 Rickettsia felis URRWXCal2, complete genome  
 4 Rickettsia akari str. Hartford chromosome, whole genome shotgun sequence  
 5 Rickettsia conorii str. Malish 7, complete genome  
 6 Rickettsia sibirica 246 rsib\_agnrt, whole genome shotgun sequence  
 7 Rickettsia rickettsii chromosome, whole genome shotgun sequence

Reg\_id: 452

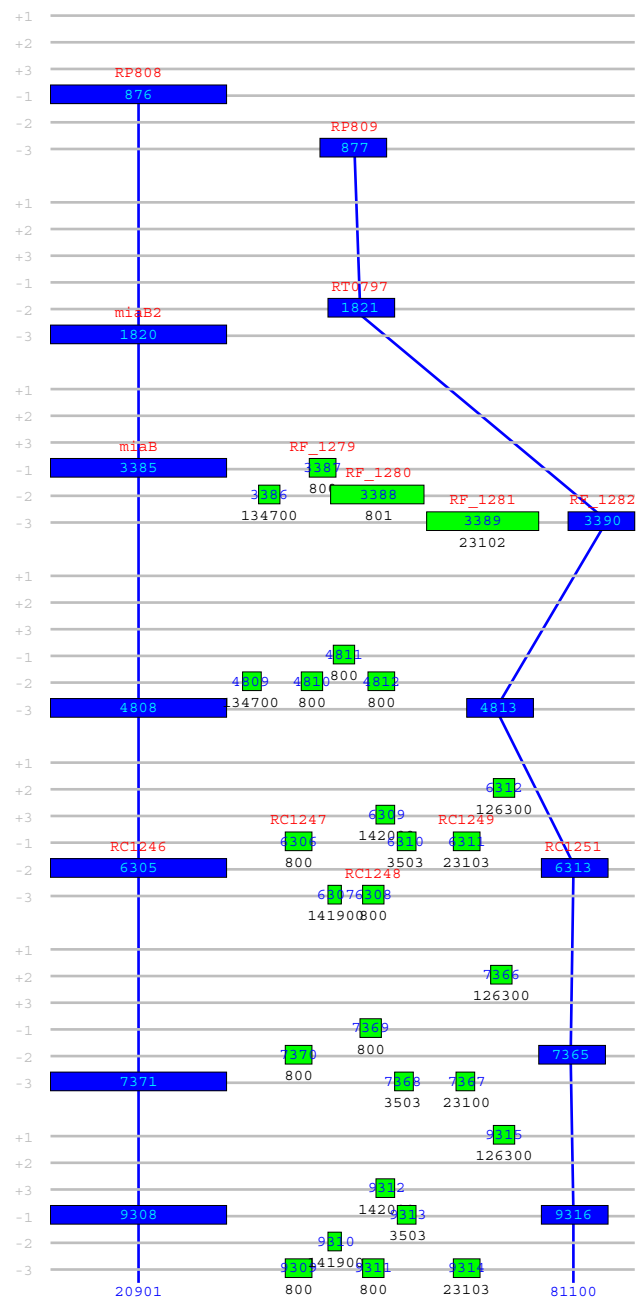

1 Rickettsia prowazekii str. Madrid E, complete genome  
 2 Rickettsia typhi str. wilmington, complete genome  
 3 Rickettsia felis URRWXCal2, complete genome  
 4 Rickettsia akari str. Hartford chromosome, whole genome shotgun sequence  
 5 Rickettsia conorii str. Malish 7, complete genome  
 6 Rickettsia sibirica 246 rsib\_agnrcr, whole genome shotgun sequence  
 7 Rickettsia rickettsii chromosome, whole genome shotgun sequence

Reg\_id: 453

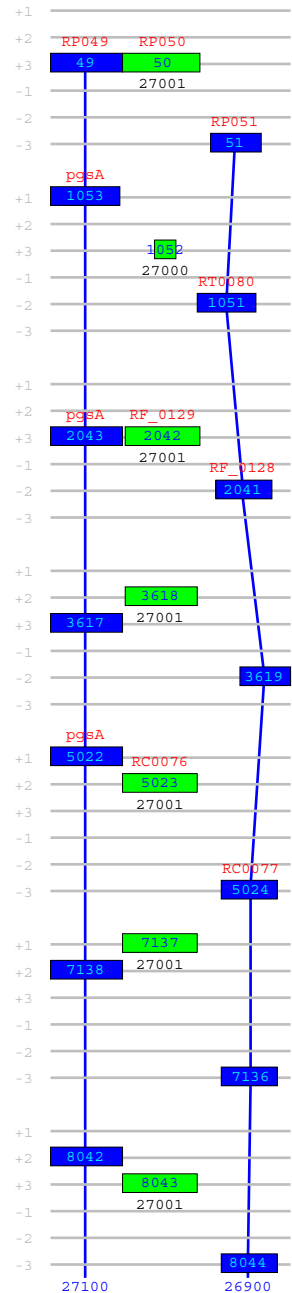

1 Rickettsia prowazekii str. Madrid E, complete genome  
 2 Rickettsia typhi str. wilmington, complete genome  
 3 Rickettsia felis URRWXCal2, complete genome  
 4 Rickettsia akari str. Hartford chromosome, whole genome shotgun sequence  
 5 Rickettsia conorii str. Malish 7, complete genome  
 6 Rickettsia sibirica 246 rsib\_agnrcr, whole genome shotgun sequence  
 7 Rickettsia rickettsii chromosome, whole genome shotgun sequence

Reg\_id: 454

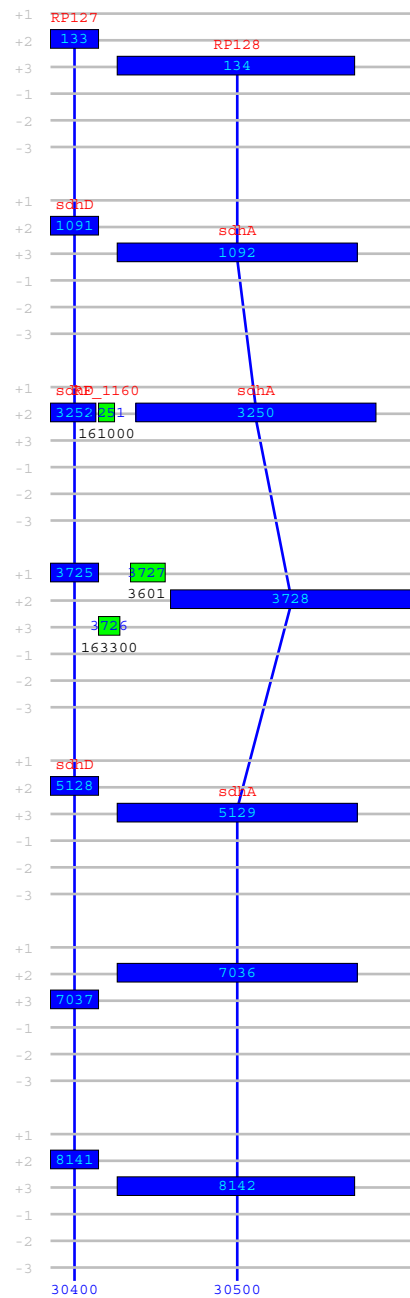



1 Rickettsia prowazekii str. Madrid E, complete genome  
 2 Rickettsia typhi str. wilmington, complete genome  
 3 Rickettsia felis URRWXCal2, complete genome  
 4 Rickettsia akari str. Hartford chromosome, whole genome shotgun sequence  
 5 Rickettsia conorii str. Malish 7, complete genome  
 6 Rickettsia sibirica 246 rsib agncrt, whole genome shotgun sequence  
 7 Rickettsia rickettsii chromosome, whole genome shotgun sequence

Reg\_id: 457

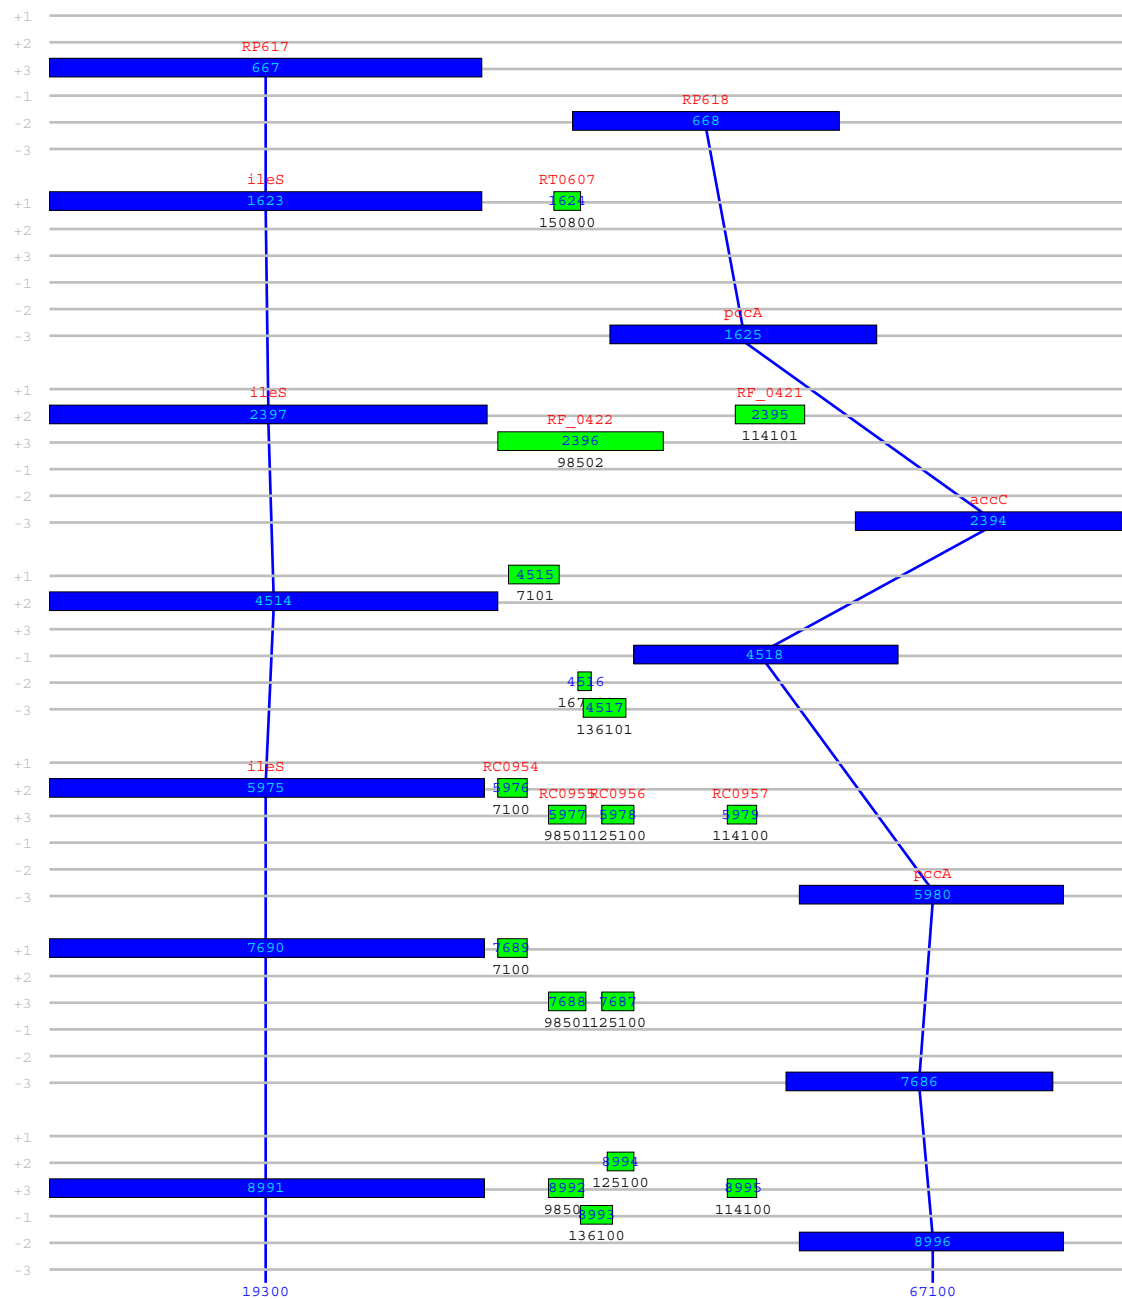

1 Rickettsia prowazekii str. Madrid E, complete genome  
 2 Rickettsia typhi str. wilmington, complete genome  
 3 Rickettsia felis URRWXCal2, complete genome  
 4 Rickettsia akari str. Hartford chromosome, whole genome shotgun sequence  
 5 Rickettsia conorii str. Malish 7, complete genome  
 6 Rickettsia sibirica 246 rsib\_agnrct, whole genome shotgun sequence  
 7 Rickettsia rickettsii chromosome, whole genome shotgun sequence

Reg\_id: 460

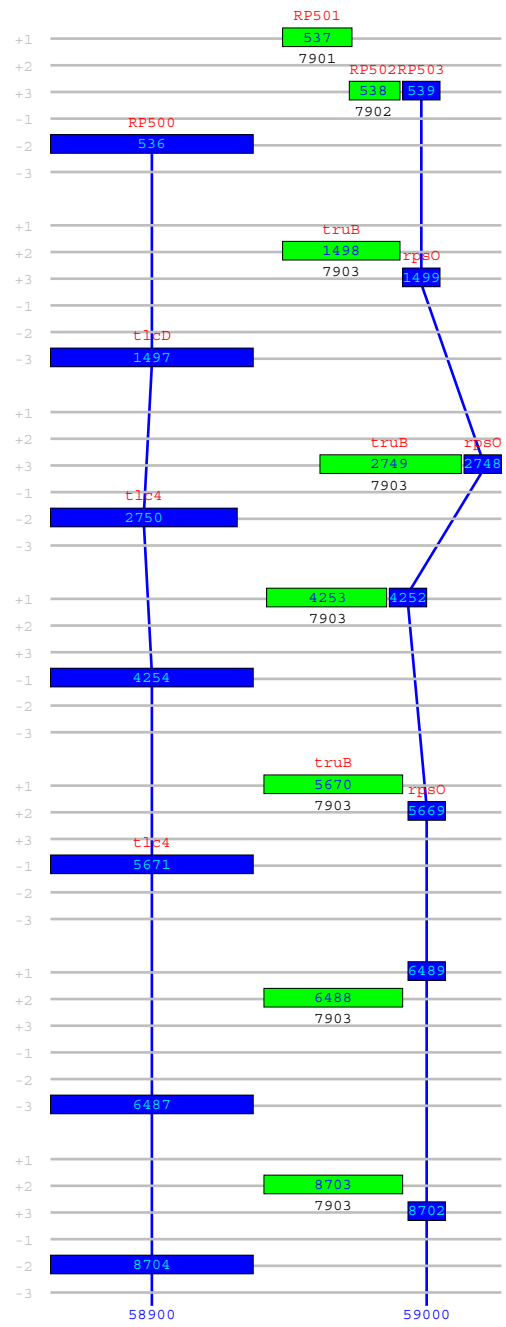

1 Rickettsia prowazekii str. Madrid E, complete genome  
 2 Rickettsia typhi str. wilmington, complete genome  
 3 Rickettsia felis URRWXCal2, complete genome  
 4 Rickettsia akari str. Hartford chromosome, whole genome shotgun sequence  
 5 Rickettsia conorii str. Malish 7, complete genome  
 6 Rickettsia sibirica 246 rsib\_agnrcr, whole genome shotgun sequence  
 7 Rickettsia rickettsii chromosome, whole genome shotgun sequence

Reg\_id: 461

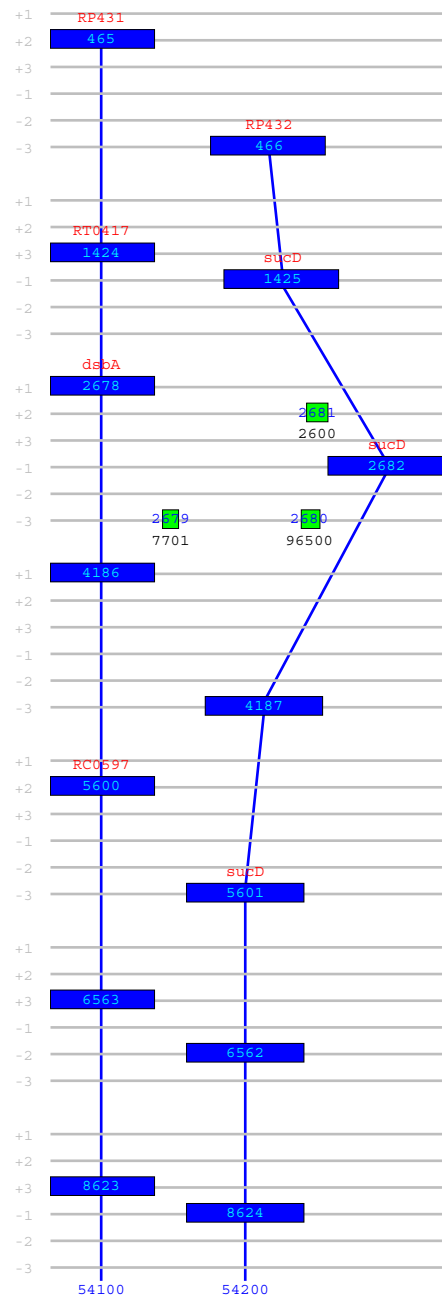

- 1 Rickettsia prowazekii str. Madrid E, complete genome
- 2 Rickettsia typhi str. wilmington, complete genome
- 3 Rickettsia felis URRWXCal2, complete genome
- 4 Rickettsia akari str. Hartford chromosome, whole genome shotgun sequence
- 5 Rickettsia conorii str. Malish 7, complete genome
- 6 Rickettsia sibirica 246 rsib\_agnrcr, whole genome shotgun sequence
- 7 Rickettsia rickettsii chromosome, whole genome shotgun sequence

Reg\_id: 464

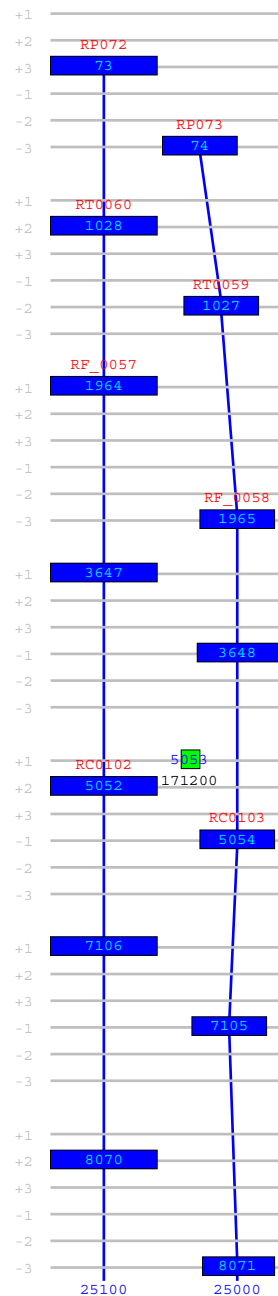

- 1 Rickettsia prowazekii str. Madrid E, complete genome
- 2 Rickettsia typhi str. wilmington, complete genome
- 3 Rickettsia felis URRWXCa2, complete genome
- 4 Rickettsia akari str. Hartford chromosome, whole genome shotgun sequence
- 5 Rickettsia conorii str. Malish 7, complete genome
- 6 Rickettsia sibirica 246 rsib\_agnrct, whole genome shotgun sequence
- 7 Rickettsia rickettsii chromosome, whole genome shotgun sequence

Reg\_id: 465

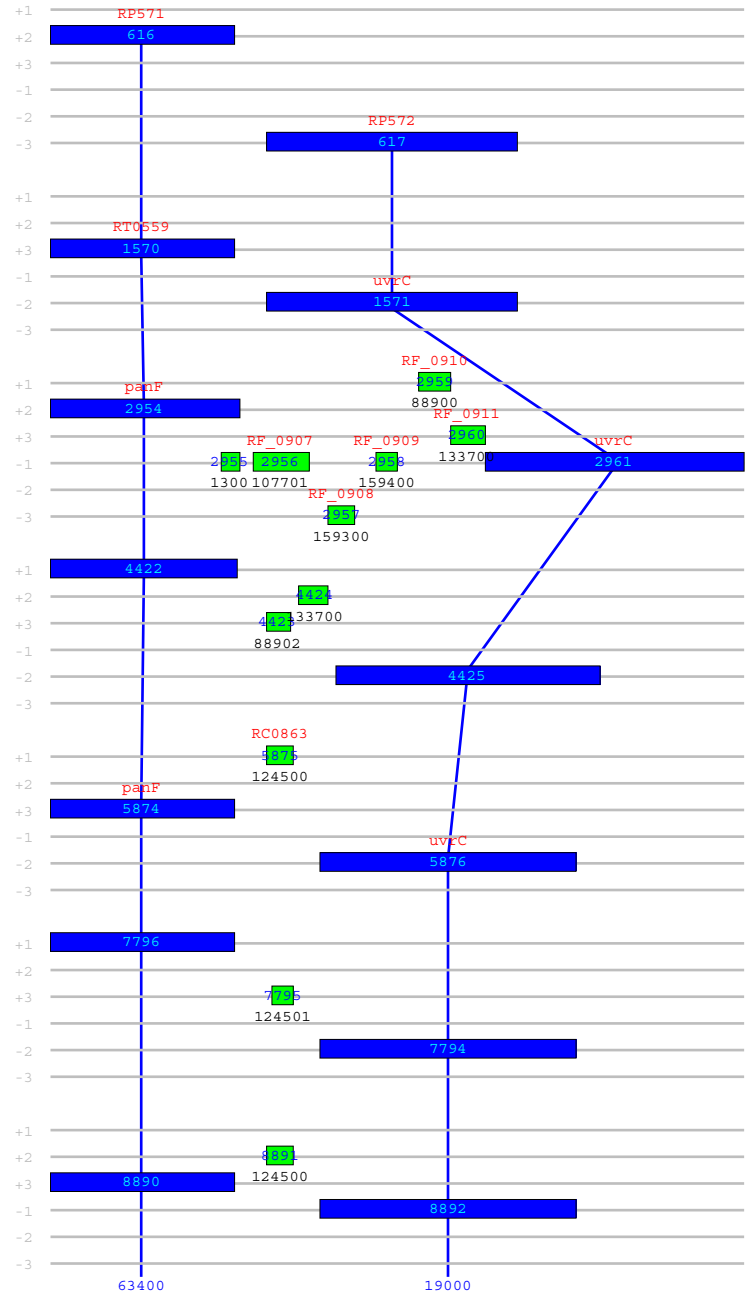

1 Rickettsia prowazekii str. Madrid E, complete genome  
 2 Rickettsia typhi str. wilmington, complete genome  
 3 Rickettsia felis URRWXCal2, complete genome  
 4 Rickettsia akari str. Hartford chromosome, whole genome shotgun sequence  
 5 Rickettsia conorii str. Malish 7, complete genome  
 6 Rickettsia sibirica 246 rsib\_agnrct, whole genome shotgun sequence  
 7 Rickettsia rickettsii chromosome, whole genome shotgun sequence

Reg\_id: 472

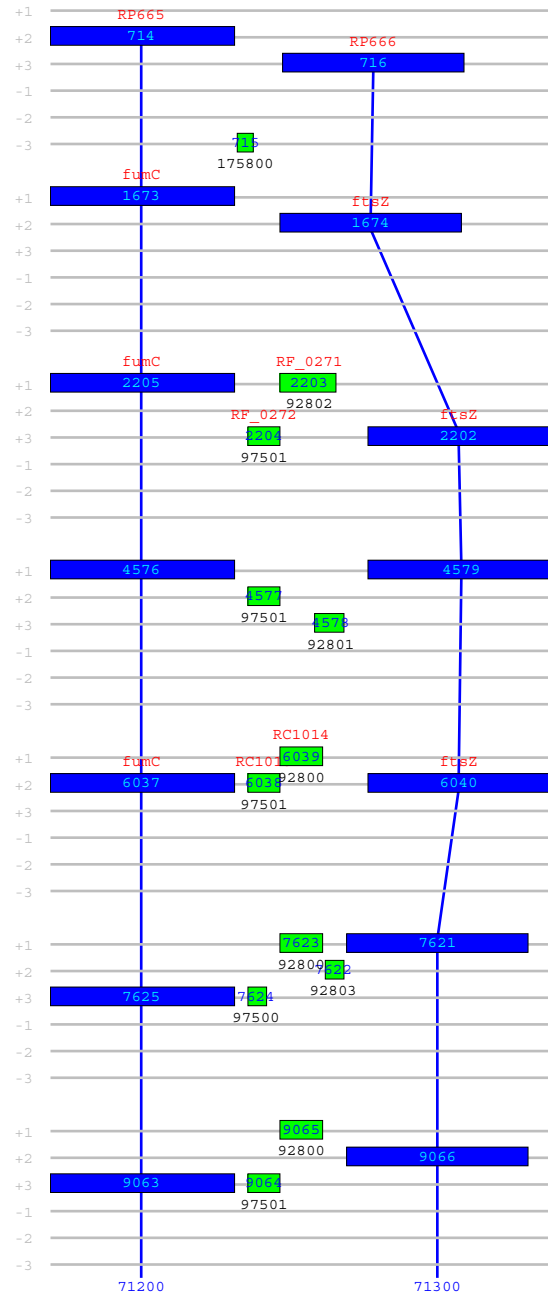

1 Rickettsia prowazekii str. Madrid E, complete genome  
 2 Rickettsia typhi str. wilmington, complete genome  
 3 Rickettsia felis URRWXCal2, complete genome  
 4 Rickettsia akari str. Hartford chromosome, whole genome shotgun sequence  
 5 Rickettsia conorii str. Malish 7, complete genome  
 6 Rickettsia sibirica 246 rsib\_agnrcr, whole genome shotgun sequence  
 7 Rickettsia rickettsii chromosome, whole genome shotgun sequence

Reg\_id: 477

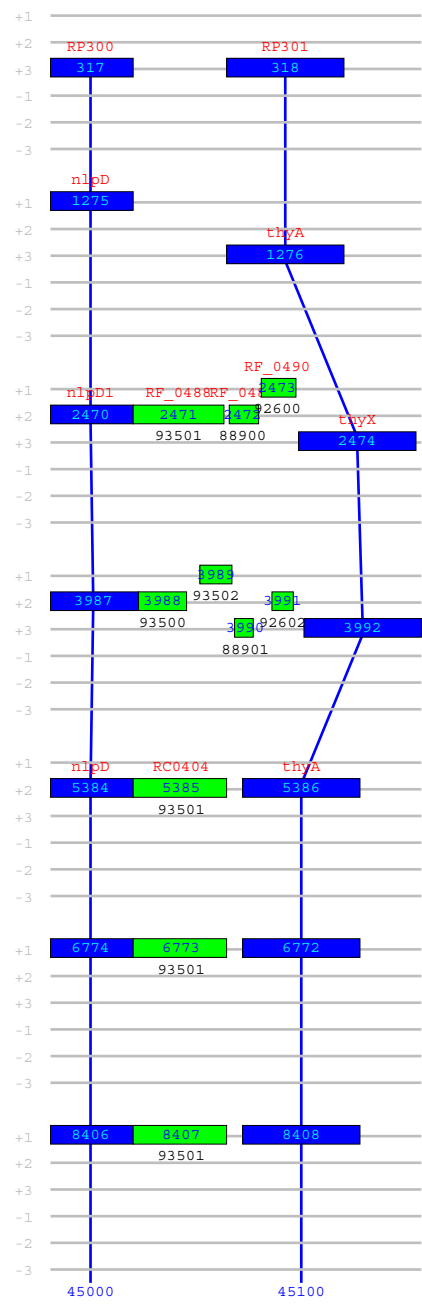

1 Rickettsia prowazekii str. Madrid E, complete genome  
 2 Rickettsia typhi str. wilmington, complete genome  
 3 Rickettsia felis URRWXCal2, complete genome  
 4 Rickettsia akari str. Hartford chromosome, whole genome shotgun sequence  
 5 Rickettsia conorii str. Malish 7, complete genome  
 6 Rickettsia sibirica 246 rsib\_agnrt, whole genome shotgun sequence  
 7 Rickettsia rickettsii chromosome, whole genome shotgun sequence

Reg\_id: 478

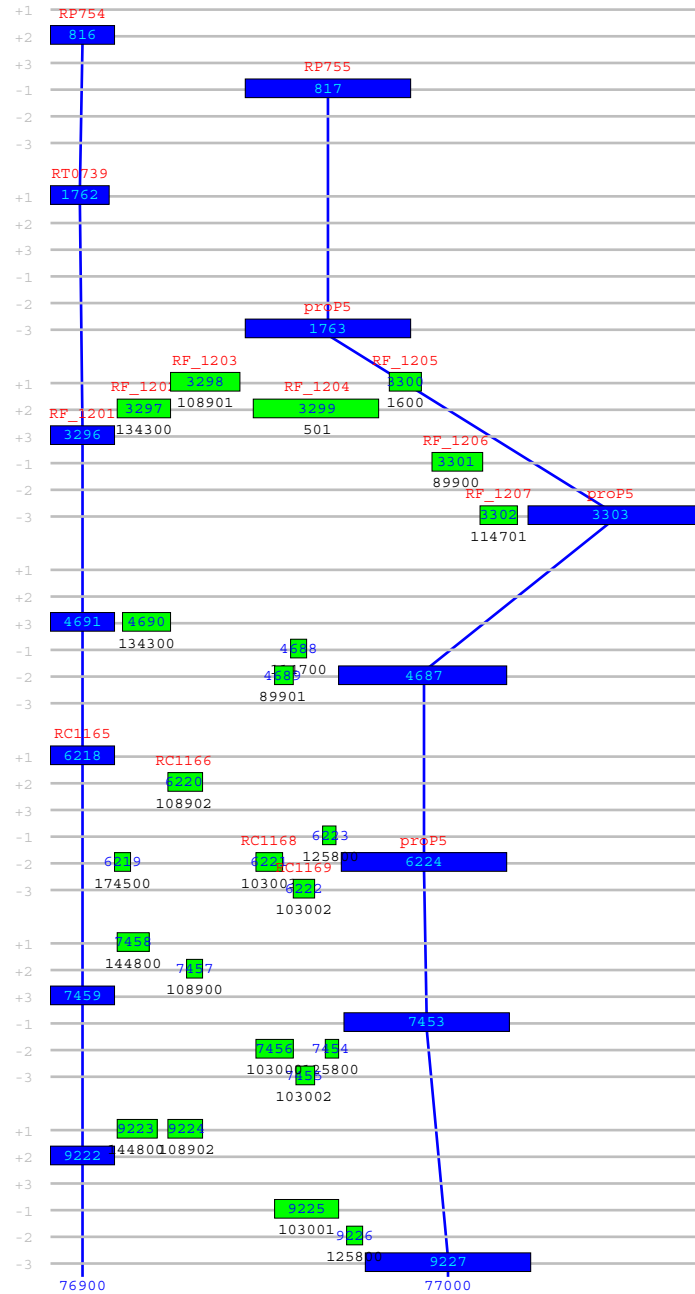



1 Rickettsia prowazekii str. Madrid E, complete genome  
 2 Rickettsia typhi str. wilmington, complete genome  
 3 Rickettsia felis URRWXCal2, complete genome  
 4 Rickettsia akari str. Hartford chromosome, whole genome shotgun sequence  
 5 Rickettsia conorii str. Malish 7, complete genome  
 6 Rickettsia sibirica 246 rsib\_agnrct, whole genome shotgun sequence  
 7 Rickettsia rickettsii chromosome, whole genome shotgun sequence

Reg\_id: 479

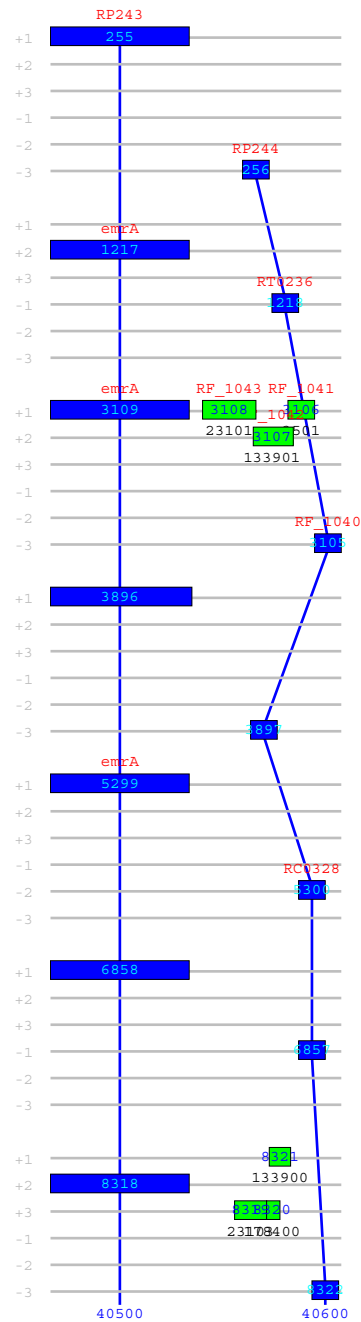

1 Rickettsia prowazekii str. Madrid E, complete genome  
 2 Rickettsia typhi str. wilmington, complete genome  
 3 Rickettsia felis URRWXCal2, complete genome  
 4 Rickettsia akari str. Hartford chromosome, whole genome shotgun sequence  
 5 Rickettsia conorii str. Malish 7, complete genome  
 6 Rickettsia sibirica 246 rsib\_agnrct, whole genome shotgun sequence  
 7 Rickettsia rickettsii chromosome, whole genome shotgun sequence

Reg\_id: 481

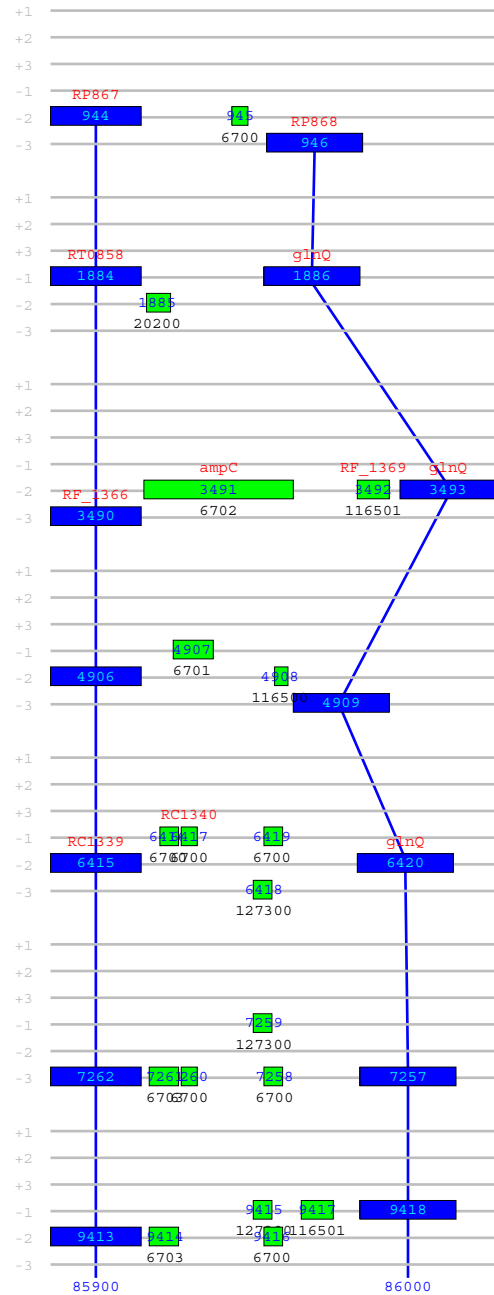

1 Rickettsia prowazekii str. Madrid E, complete genome  
 2 Rickettsia typhi str. wilmington, complete genome  
 3 Rickettsia felis URRWXCal2, complete genome  
 4 Rickettsia akari str. Hartford chromosome, whole genome shotgun sequence  
 5 Rickettsia conorii str. Malish 7, complete genome  
 6 Rickettsia sibirica 246 rsib\_agnrct, whole genome shotgun sequence  
 7 Rickettsia rickettsii chromosome, whole genome shotgun sequence

Reg\_id: 482

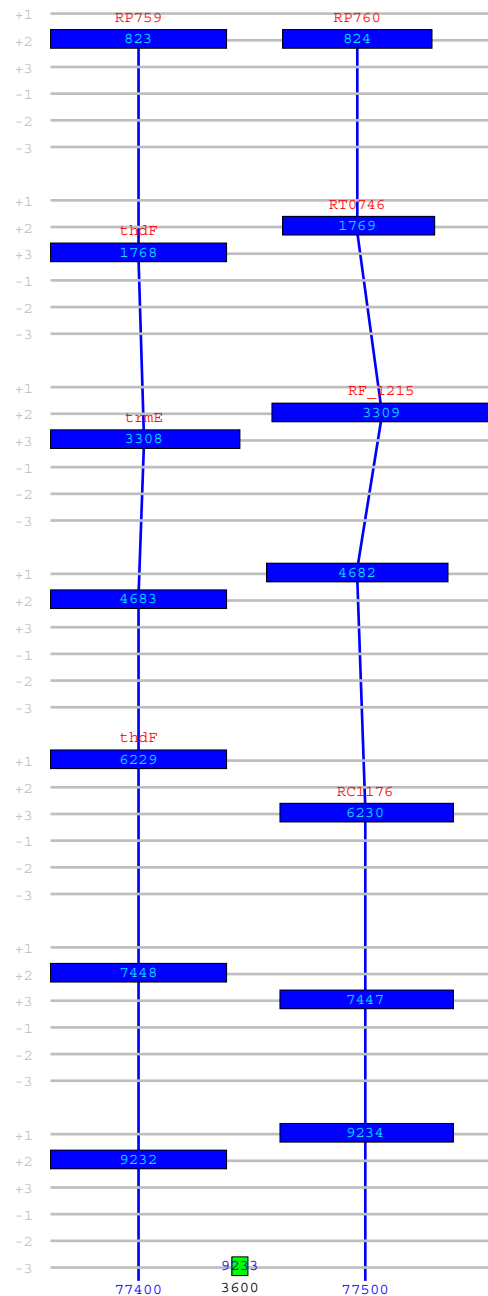

- 1 Rickettsia prowazekii str. Madrid E, complete genome
- 2 Rickettsia typhi str. wilmington, complete genome
- 3 Rickettsia felis URRWXCal2, complete genome
- 4 Rickettsia akari str. Hartford chromosome, whole genome shotgun sequence
- 5 Rickettsia conorii str. Malish 7, complete genome
- 6 Rickettsia sibirica 246 rsib\_agnrcr, whole genome shotgun sequence
- 7 Rickettsia rickettsii chromosome, whole genome shotgun sequence

Reg\_id: 483

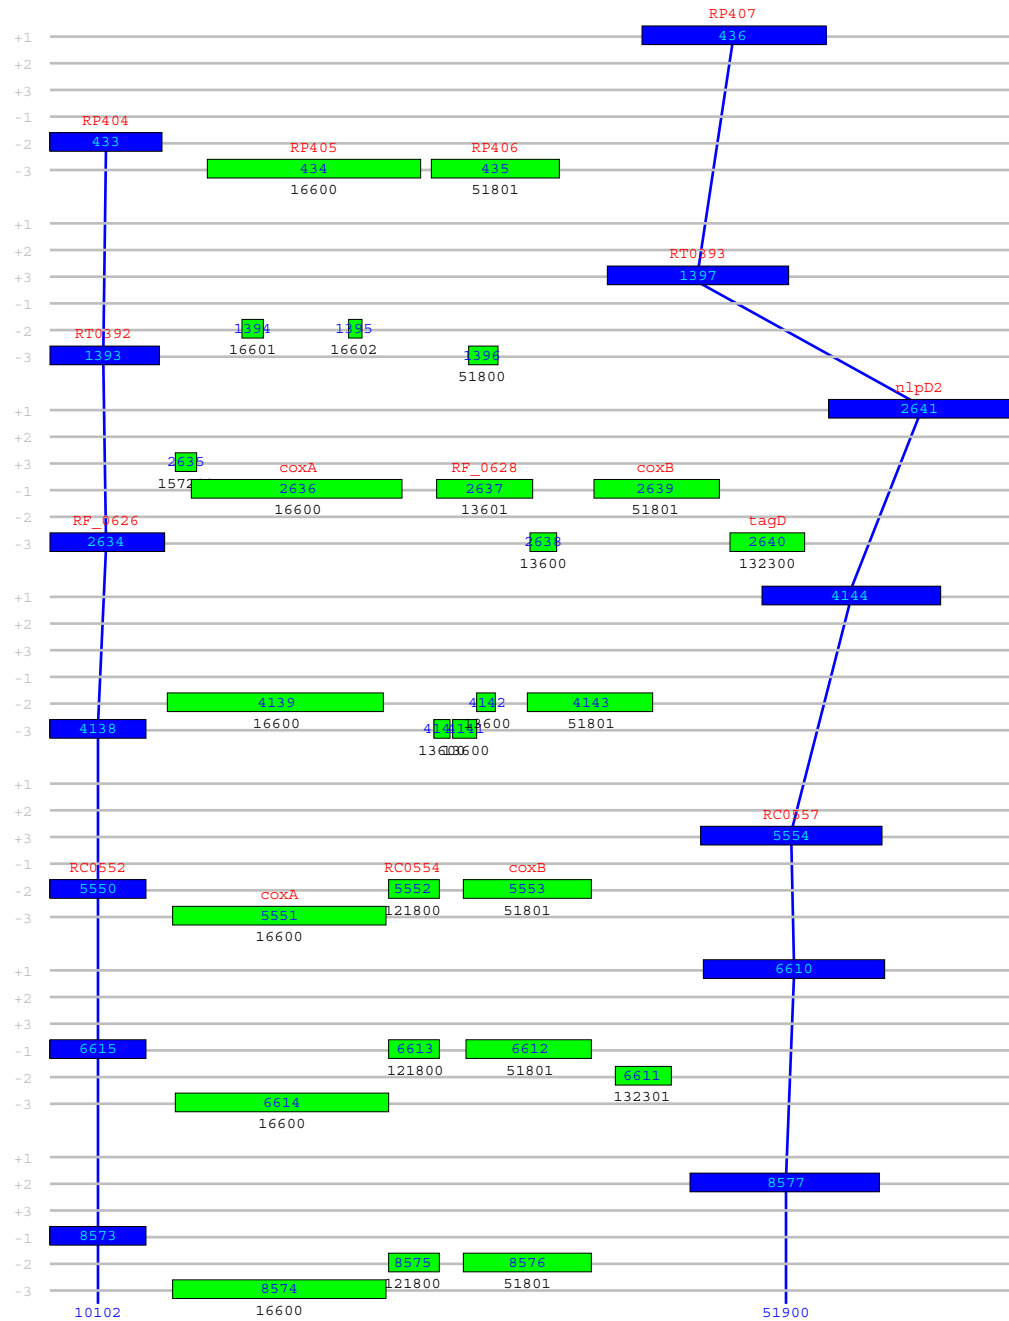

- 1 Rickettsia prowazekii str. Madrid E, complete genome
- 2 Rickettsia typhi str. wilmington, complete genome
- 3 Rickettsia felis URRWXCal2, complete genome
- 4 Rickettsia akari str. Hartford chromosome, whole genome shotgun sequence
- 5 Rickettsia conorii str. Malish 7, complete genome
- 6 Rickettsia sibirica 246 rsib\_agnrcr, whole genome shotgun sequence
- 7 Rickettsia rickettsii chromosome, whole genome shotgun sequence

Reg\_id: 484

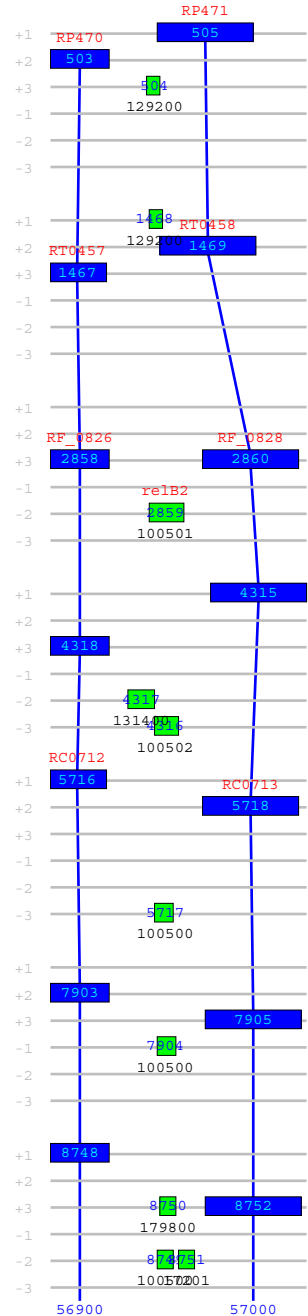

1 Rickettsia prowazekii str. Madrid E, complete genome  
 2 Rickettsia typhi str. wilmington, complete genome  
 3 Rickettsia felis URRWXCal2, complete genome  
 4 Rickettsia akari str. Hartford chromosome, whole genome shotgun sequence  
 5 Rickettsia conorii str. Malish 7, complete genome  
 6 Rickettsia sibirica 246 rsib\_agnrcr, whole genome shotgun sequence  
 7 Rickettsia rickettsii chromosome, whole genome shotgun sequence

Reg\_id: 485

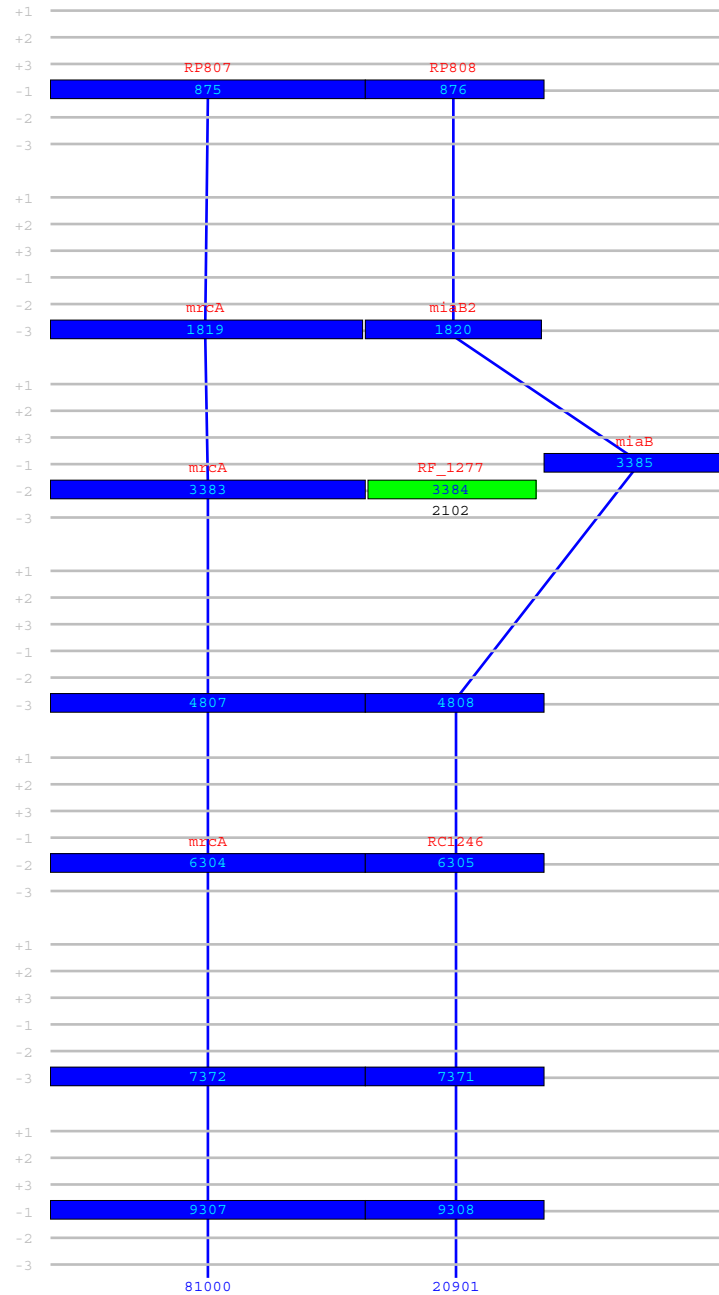

1 Rickettsia prowazekii str. Madrid E, complete genome  
 2 Rickettsia typhi str. wilmington, complete genome  
 3 Rickettsia felis URRWXCal2, complete genome  
 4 Rickettsia akari str. Hartford chromosome, whole genome shotgun sequence  
 5 Rickettsia conorii str. Malish 7, complete genome  
 6 Rickettsia sibirica 246 rsib\_agnrcr, whole genome shotgun sequence  
 7 Rickettsia rickettsii chromosome, whole genome shotgun sequence

Reg\_id: 489

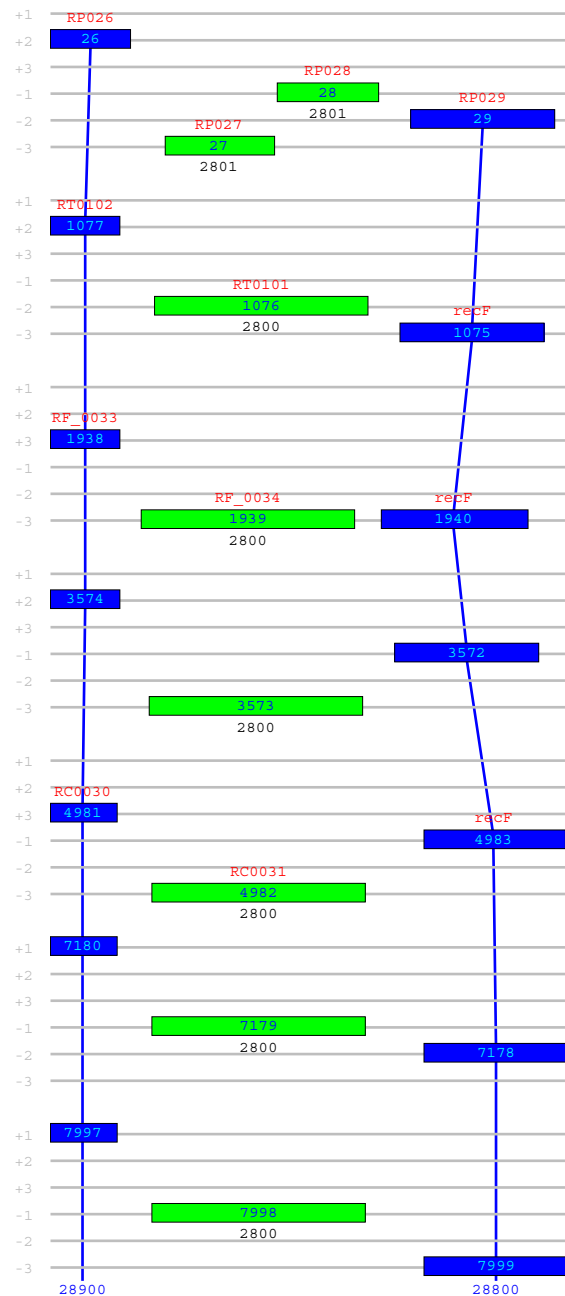

- 1 Rickettsia prowazekii str. Madrid E, complete genome
- 2 Rickettsia typhi str. wilmington, complete genome
- 3 Rickettsia felis URRWXCal2, complete genome
- 4 Rickettsia akari str. Hartford chromosome, whole genome shotgun sequence
- 5 Rickettsia conorii str. Malish 7, complete genome
- 6 Rickettsia sibirica 246 rsib\_agnrcr, whole genome shotgun sequence
- 7 Rickettsia rickettsii chromosome, whole genome shotgun sequence

Reg\_id: 490

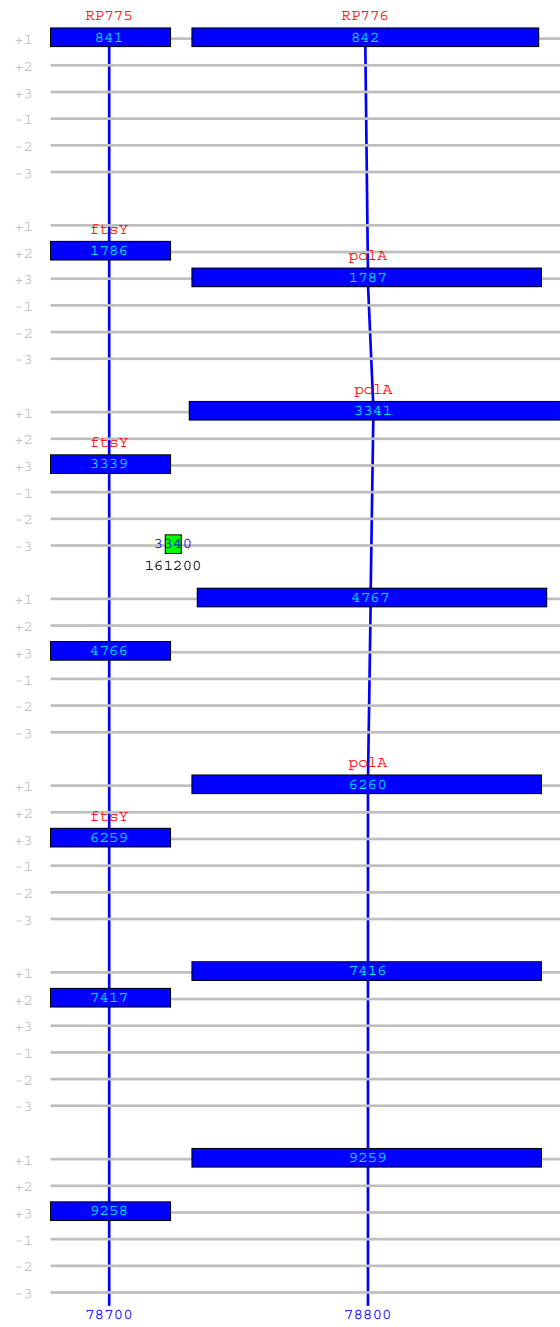



1 Rickettsia prowazekii str. Madrid E, complete genome  
 2 Rickettsia typhi str. wilmington, complete genome  
 3 Rickettsia felis URRWXCal2, complete genome  
 4 Rickettsia akari str. Hartford chromosome, whole genome shotgun sequence  
 5 Rickettsia conorii str. Malish 7, complete genome  
 6 Rickettsia sibirica 246 rsib\_agnrcr, whole genome shotgun sequence  
 7 Rickettsia rickettsii chromosome, whole genome shotgun sequence

Reg\_id: 494

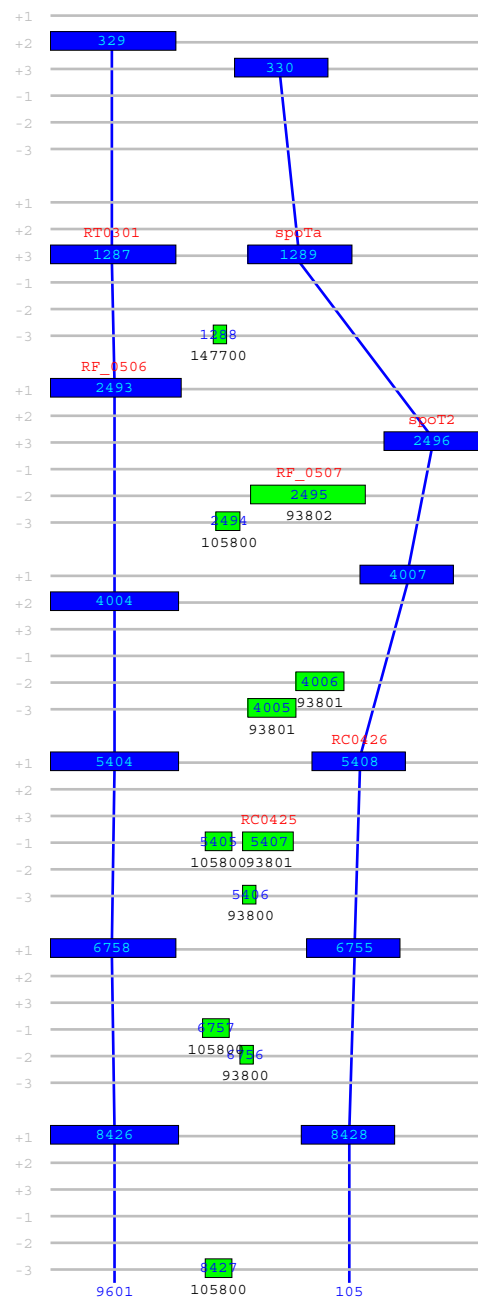

1 Rickettsia prowazekii str. Madrid E, complete genome  
 2 Rickettsia typhi str. wilmington, complete genome  
 3 Rickettsia felis URRWXCal2, complete genome  
 4 Rickettsia akari str. Hartford chromosome, whole genome shotgun sequence  
 5 Rickettsia conorii str. Malish 7, complete genome  
 6 Rickettsia sibirica 246 rsib\_agnrcr, whole genome shotgun sequence  
 7 Rickettsia rickettsii chromosome, whole genome shotgun sequence

Reg\_id: 497

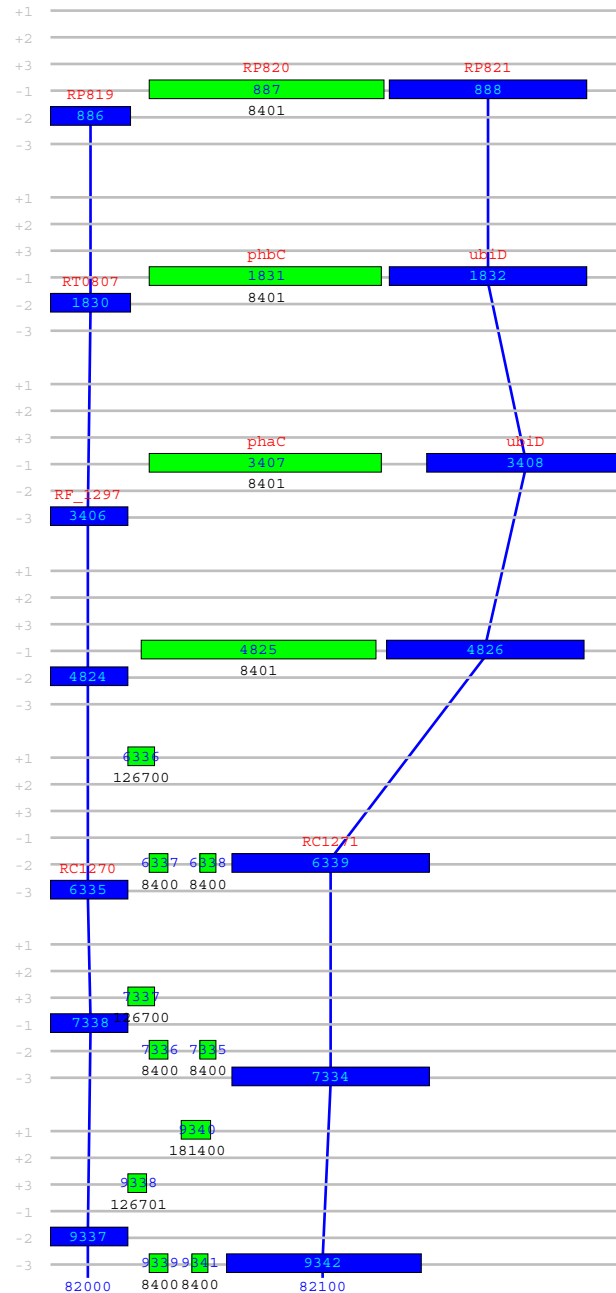

1 Rickettsia prowazekii str. Madrid E, complete genome  
 2 Rickettsia typhi str. wilmington, complete genome  
 3 Rickettsia felis URRWXCal2, complete genome  
 4 Rickettsia akari str. Hartford chromosome, whole genome shotgun sequence  
 5 Rickettsia conorii str. Malish 7, complete genome  
 6 Rickettsia sibirica 246 rsib\_agnrcr, whole genome shotgun sequence  
 7 Rickettsia rickettsii chromosome, whole genome shotgun sequence

Reg\_id: 499

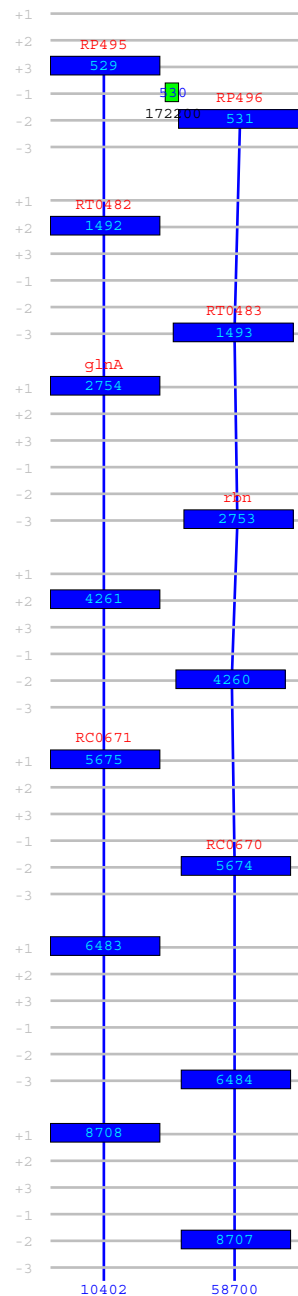

1 Rickettsia prowazekii str. Madrid E, complete genome  
 2 Rickettsia typhi str. wilmington, complete genome  
 3 Rickettsia felis URRWXCal2, complete genome  
 4 Rickettsia akari str. Hartford chromosome, whole genome shotgun sequence  
 5 Rickettsia conorii str. Malish 7, complete genome  
 6 Rickettsia sibirica 246 rsib\_agnrct, whole genome shotgun sequence  
 7 Rickettsia rickettsii chromosome, whole genome shotgun sequence

Reg\_id: 501

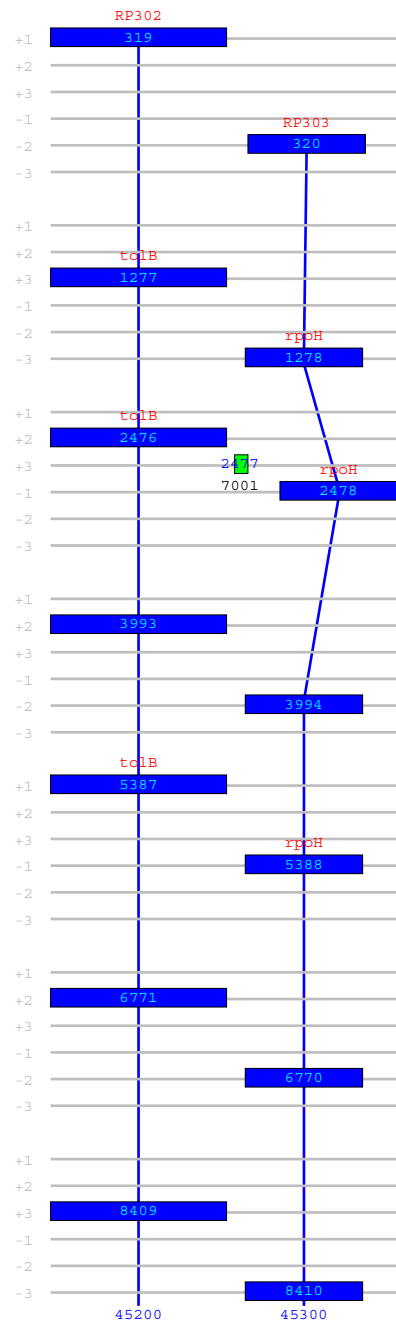

- 1 Rickettsia prowazekii str. Madrid E, complete genome
- 2 Rickettsia typhi str. wilmington, complete genome
- 3 Rickettsia felis URRWXCal2, complete genome
- 4 Rickettsia akari str. Hartford chromosome, whole genome shotgun sequence
- 5 Rickettsia conorii str. Malish 7, complete genome
- 6 Rickettsia sibirica 246 rsib\_agnrct, whole genome shotgun sequence
- 7 Rickettsia rickettsii chromosome, whole genome shotgun sequence

Reg\_id: 509

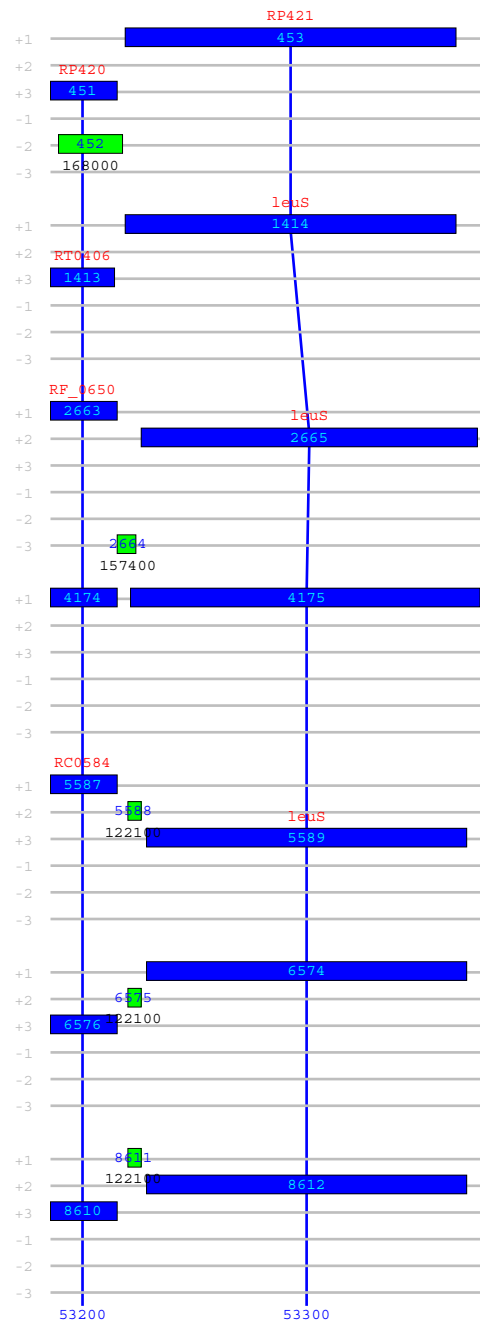

- 1 Rickettsia prowazekii str. Madrid E, complete genome  
 2 Rickettsia typhi str. wilmington, complete genome  
 3 Rickettsia felis URRWXCal2, complete genome  
 4 Rickettsia akari str. Hartford chromosome, whole genome shotgun sequence  
 5 Rickettsia conorii str. Malish 7, complete genome  
 6 Rickettsia sibirica 246 rsib\_agnrcr, whole genome shotgun sequence  
 7 Rickettsia rickettsii chromosome, whole genome shotgun sequence

Reg\_id: 510

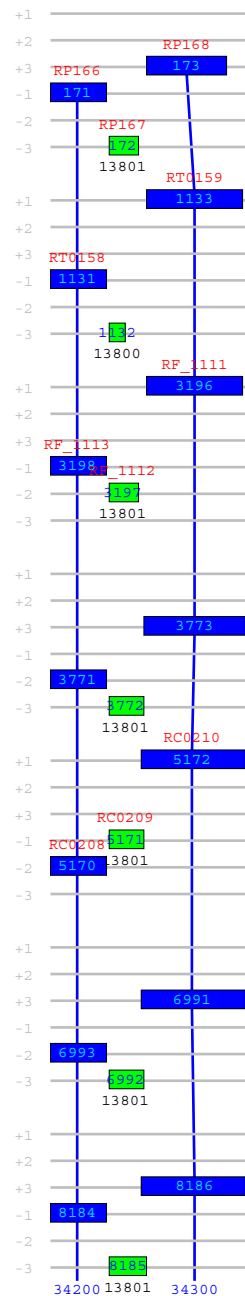

- 1 Rickettsia prowazekii str. Madrid E, complete genome
- 2 Rickettsia typhi str. wilmington, complete genome
- 3 Rickettsia felis URRWXCal2, complete genome
- 4 Rickettsia akari str. Hartford chromosome, whole genome shotgun sequence
- 5 Rickettsia conorii str. Malish 7, complete genome
- 6 Rickettsia sibirica 246 rsib\_agnrt, whole genome shotgun sequence
- 7 Rickettsia rickettsii chromosome, whole genome shotgun sequence

Reg\_id: 512

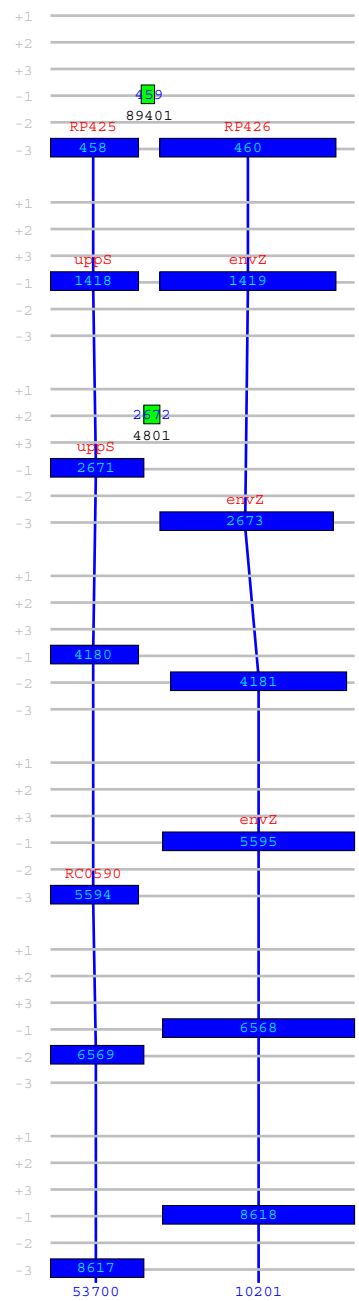

1 Rickettsia prowazekii str. Madrid E, complete genome  
 2 Rickettsia typhi str. wilmington, complete genome  
 3 Rickettsia felis URRWXCa2, complete genome  
 4 Rickettsia akari str. Hartford chromosome, whole genome shotgun sequence  
 5 Rickettsia conorii str. Malish 7, complete genome  
 6 Rickettsia sibirica 246 rsib\_agnrcr, whole genome shotgun sequence  
 7 Rickettsia rickettsii chromosome, whole genome shotgun sequence

Reg\_id: 513

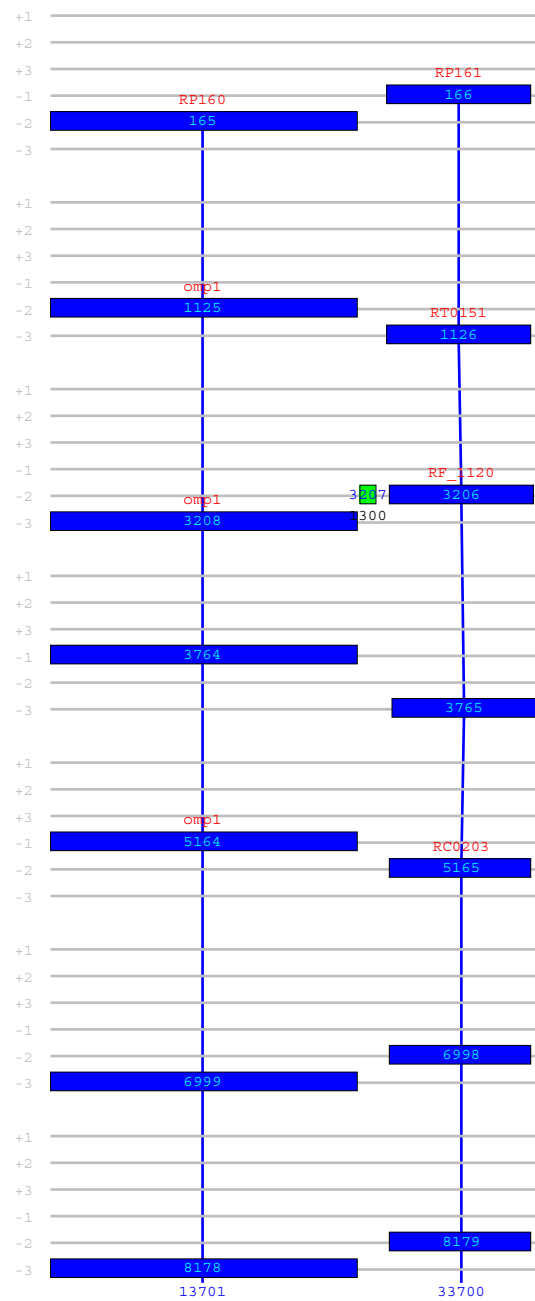



1 Rickettsia prowazekii str. Madrid E, complete genome  
 2 Rickettsia typhi str. wilmington, complete genome  
 3 Rickettsia felis URRWXCal2, complete genome  
 4 Rickettsia akari str. Hartford chromosome, whole genome shotgun sequence  
 5 Rickettsia conorii str. Malish 7, complete genome  
 6 Rickettsia sibirica 246 rsib\_agnrct, whole genome shotgun sequence  
 7 Rickettsia rickettsii chromosome, whole genome shotgun sequence

Reg\_id: 514

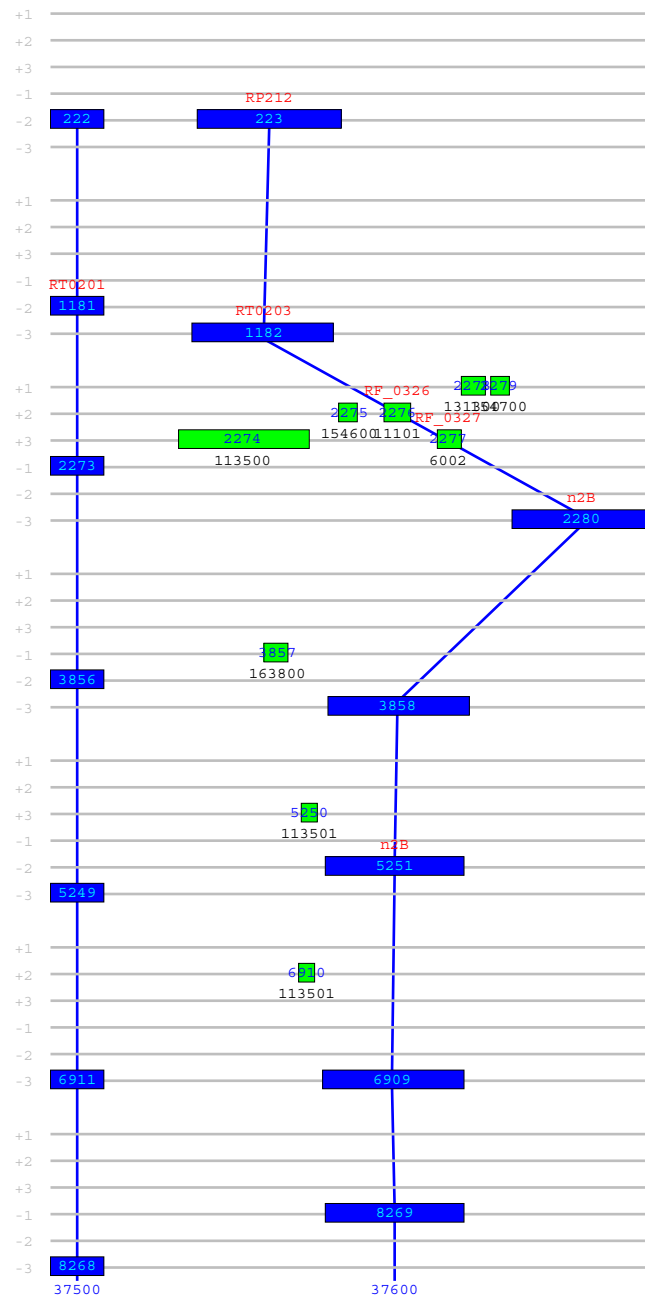



- 1 Rickettsia prowazekii str. Madrid E, complete genome
- 2 Rickettsia typhi str. wilmington, complete genome
- 3 Rickettsia felis URRWXCal2, complete genome
- 4 Rickettsia akari str. Hartford chromosome, whole genome shotgun sequence
- 5 Rickettsia conorii str. Malish 7, complete genome
- 6 Rickettsia sibirica 246 rsib\_agnrcr, whole genome shotgun sequence
- 7 Rickettsia rickettsii chromosome, whole genome shotgun sequence

Reg\_id: 518

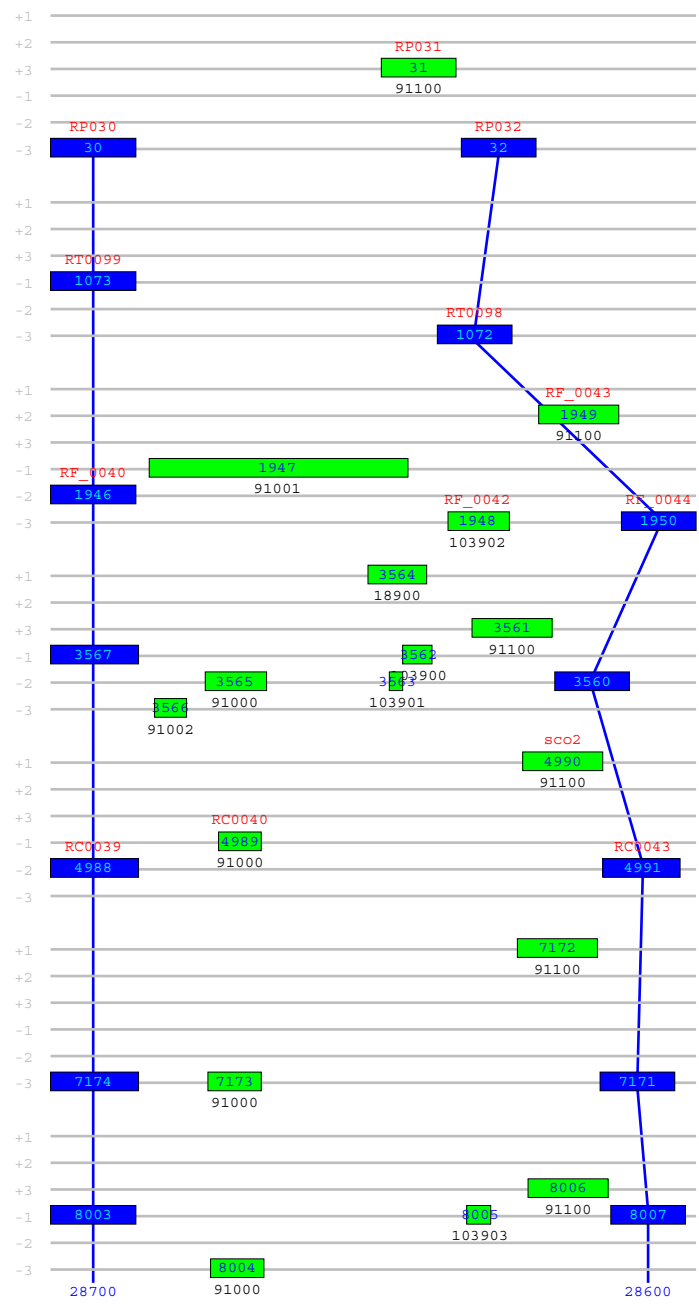

- 1 Rickettsia prowazekii str. Madrid E, complete genome
- 2 Rickettsia typhi str. wilmington, complete genome
- 3 Rickettsia felis URRWXCal2, complete genome
- 4 Rickettsia akari str. Hartford chromosome, whole genome shotgun sequence
- 5 Rickettsia conorii str. Malish 7, complete genome
- 6 Rickettsia sibirica 246 rsib\_agnrcr, whole genome shotgun sequence
- 7 Rickettsia rickettsii chromosome, whole genome shotgun sequence

Reg\_id: 519

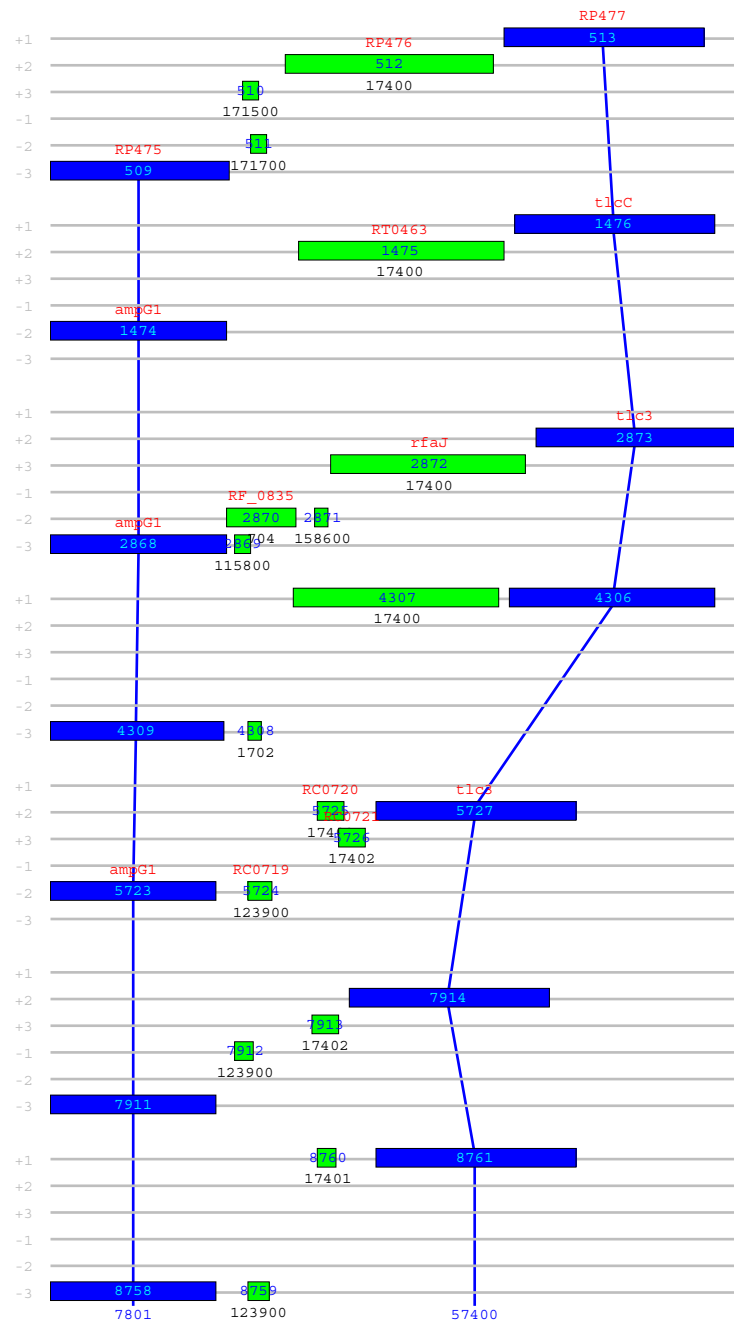

- 1 Rickettsia prowazekii str. Madrid E, complete genome
- 2 Rickettsia typhi str. wilmington, complete genome
- 3 Rickettsia felis URRWXCal2, complete genome
- 4 Rickettsia akari str. Hartford chromosome, whole genome shotgun sequence
- 5 Rickettsia conorii str. Malish 7, complete genome
- 6 Rickettsia sibirica 246 rsib agncrt, whole genome shotgun sequence
- 7 Rickettsia rickettsii chromosome, whole genome shotgun sequence

Reg\_id: 520

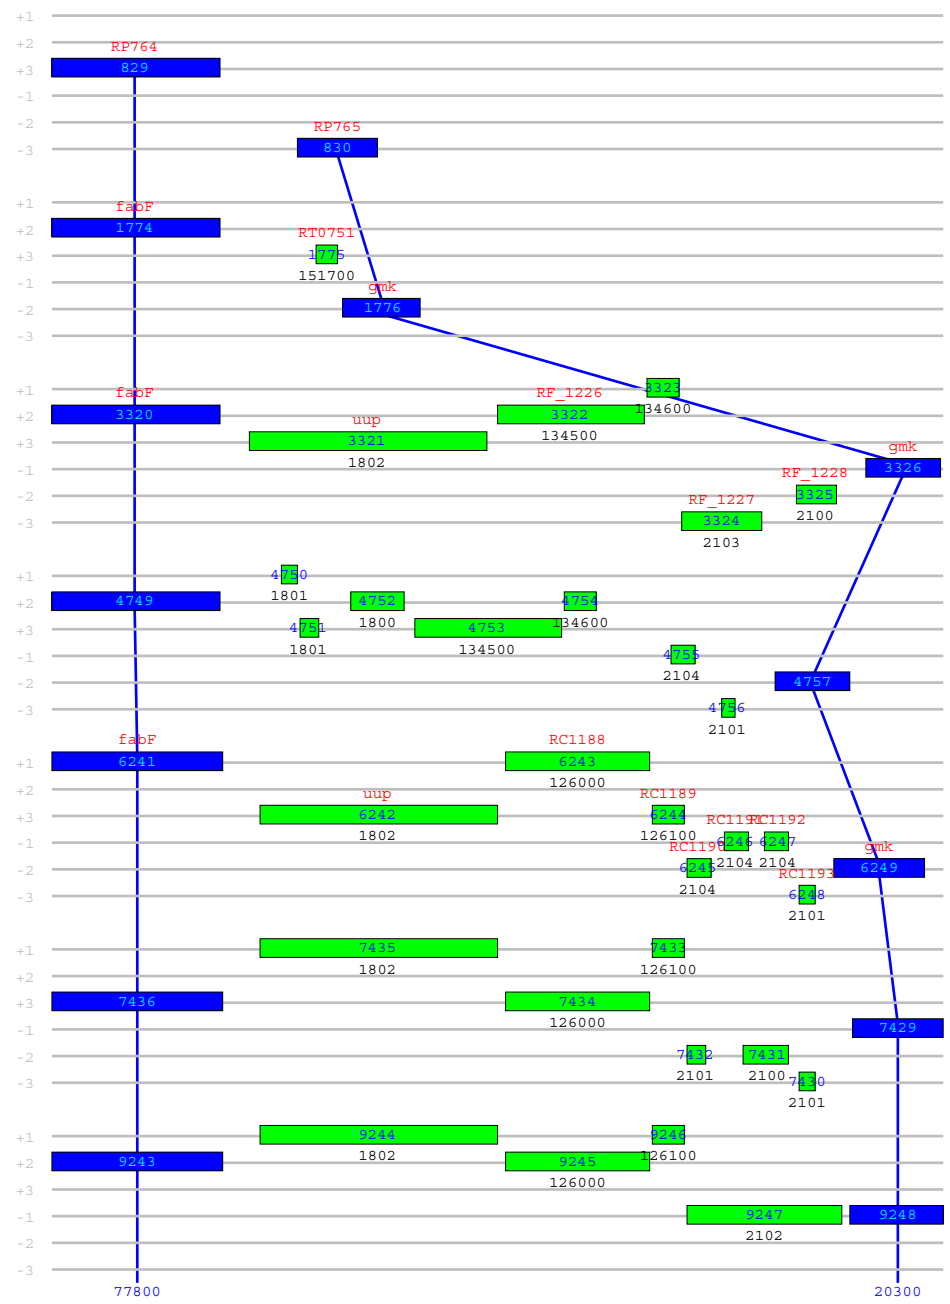

1 Rickettsia prowazekii str. Madrid E, complete genome  
 2 Rickettsia typhi str. wilmington, complete genome  
 3 Rickettsia felis URRWXCal2, complete genome  
 4 Rickettsia akari str. Hartford chromosome, whole genome shotgun sequence  
 5 Rickettsia conorii str. Malish 7, complete genome  
 6 Rickettsia sibirica 246 rsib\_agnrct, whole genome shotgun sequence  
 7 Rickettsia rickettsii chromosome, whole genome shotgun sequence

Reg\_id: 523

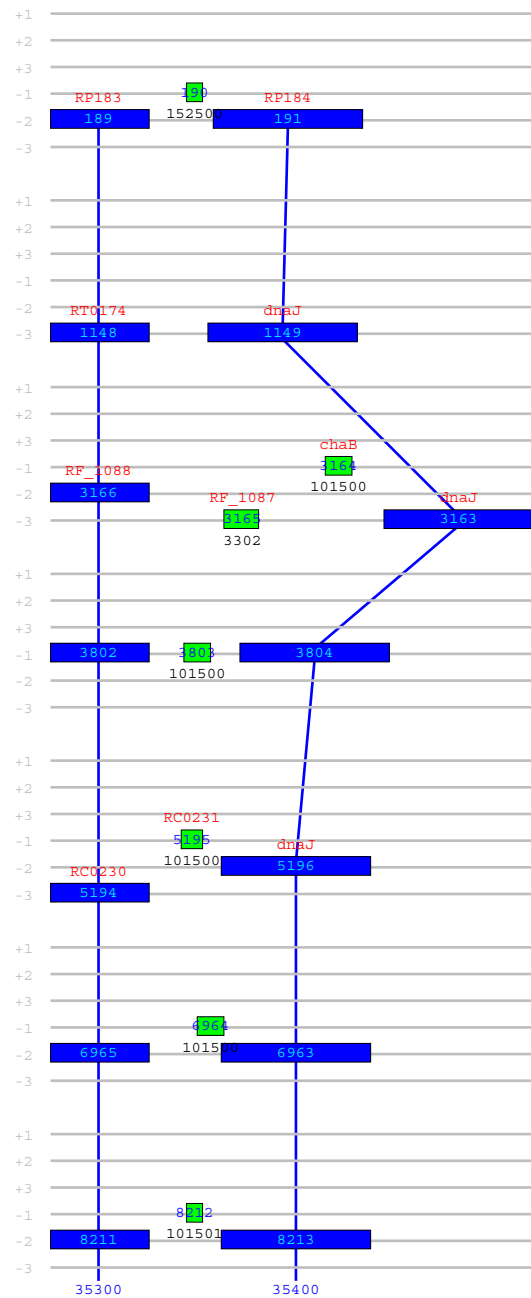

1 Rickettsia prowazekii str. Madrid E, complete genome  
 2 Rickettsia typhi str. wilmington, complete genome  
 3 Rickettsia felis URRWXCal2, complete genome  
 4 Rickettsia akari str. Hartford chromosome, whole genome shotgun sequence  
 5 Rickettsia conorii str. Malish 7, complete genome  
 6 Rickettsia sibirica 246 rsib\_agnrcr, whole genome shotgun sequence  
 7 Rickettsia rickettsii chromosome, whole genome shotgun sequence

Reg\_id: 525

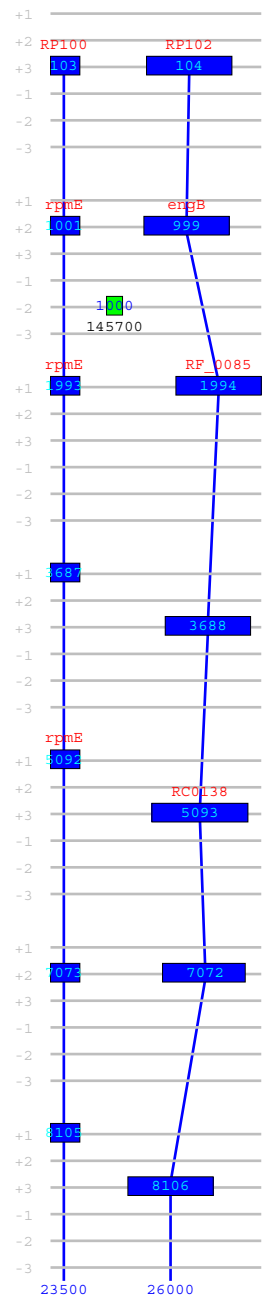

1 Rickettsia prowazekii str. Madrid E, complete genome  
 2 Rickettsia typhi str. wilmington, complete genome  
 3 Rickettsia felis URRWXCal2, complete genome  
 4 Rickettsia akari str. Hartford chromosome, whole genome shotgun sequence  
 5 Rickettsia conorii str. Malish 7, complete genome  
 6 Rickettsia sibirica 246 rsib\_agnrct, whole genome shotgun sequence  
 7 Rickettsia rickettsii chromosome, whole genome shotgun sequence

Reg\_id: 530

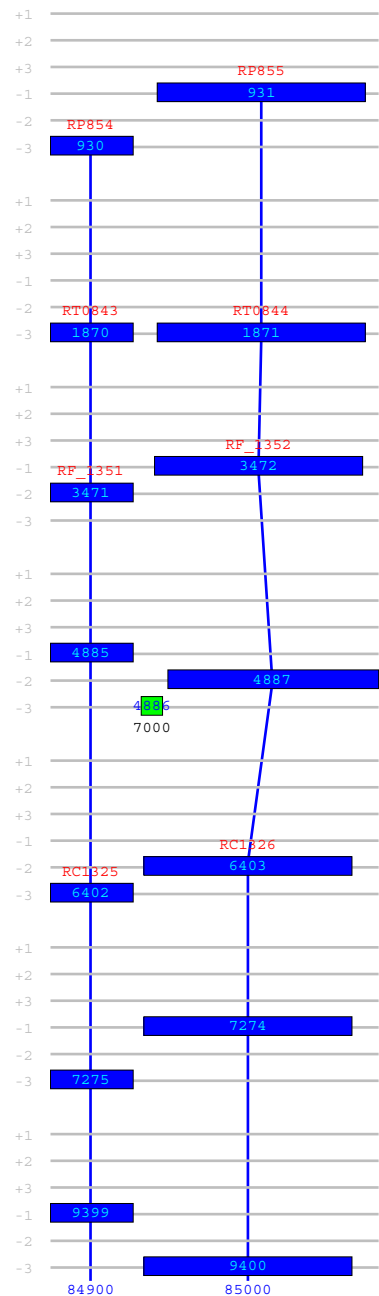



- 1 Rickettsia prowazekii str. Madrid E, complete genome
- 2 Rickettsia typhi str.wilmington, complete genome
- 3 Rickettsia felis URRWXCa12, complete genome
- 4 Rickettsia akari str. Hartford chromosome, whole genome shotgun sequence
- 5 Rickettsia conorii str. Malish 7, complete genome
- 6 Rickettsia sibirica 246 rsib agncrt, whole genome shotgun sequence
- 7 Rickettsia rickettsii chromosome, whole genome shotgun sequence

Reg\_id: 534

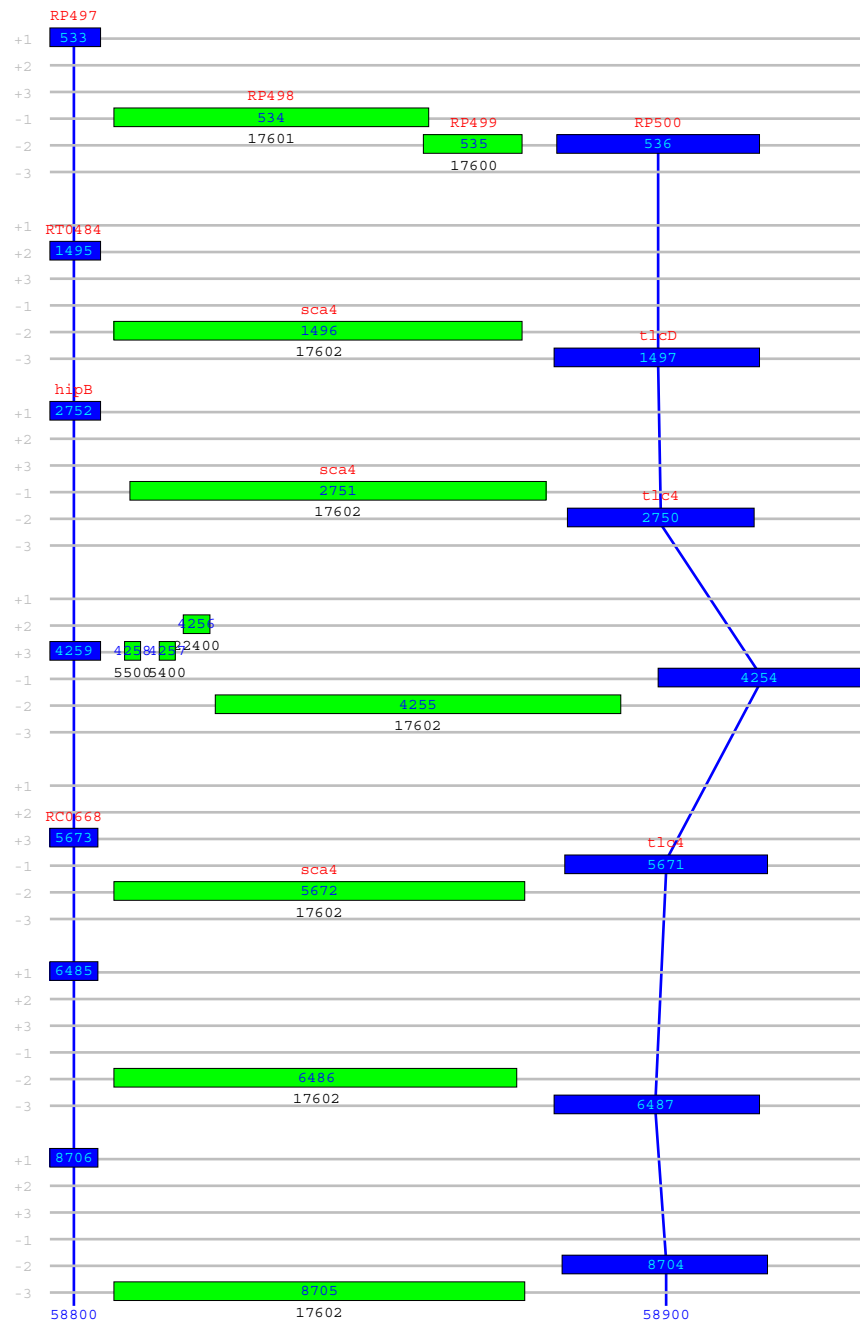



1 Rickettsia prowazekii str. Madrid E, complete genome  
 2 Rickettsia typhi str. wilmington, complete genome  
 3 Rickettsia felis URRWXCal2, complete genome  
 4 Rickettsia akari str. Hartford chromosome, whole genome shotgun sequence  
 5 Rickettsia conorii str. Malish 7, complete genome  
 6 Rickettsia sibirica 246 rsib\_agnrcr, whole genome shotgun sequence  
 7 Rickettsia rickettsii chromosome, whole genome shotgun sequence

Reg\_id: 540

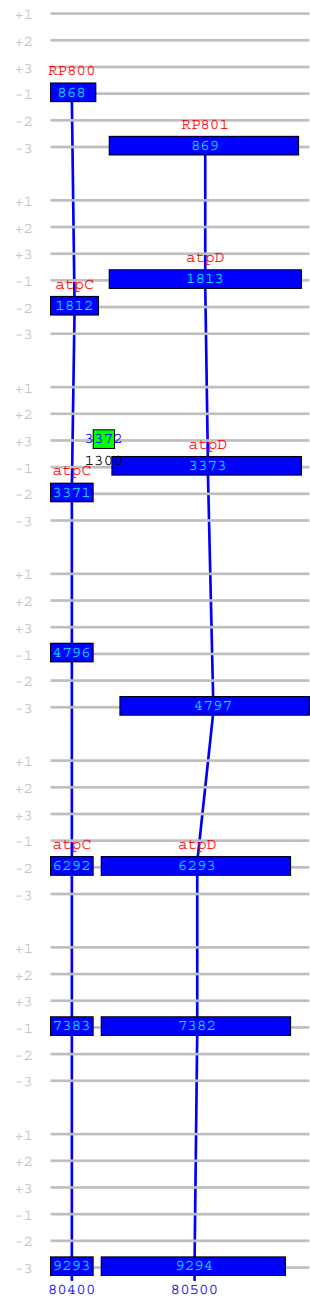

- 1 Rickettsia prowazekii str. Madrid E, complete genome  
 2 Rickettsia typhi str. wilmington, complete genome  
 3 Rickettsia felis URRWXCal2, complete genome  
 4 Rickettsia akari str. Hartford chromosome, whole genome shotgun sequence  
 5 Rickettsia conorii str. Malish 7, complete genome  
 6 Rickettsia sibirica 246 rsib\_agnrcr, whole genome shotgun sequence  
 7 Rickettsia rickettsii chromosome, whole genome shotgun sequence

Reg\_id: 542

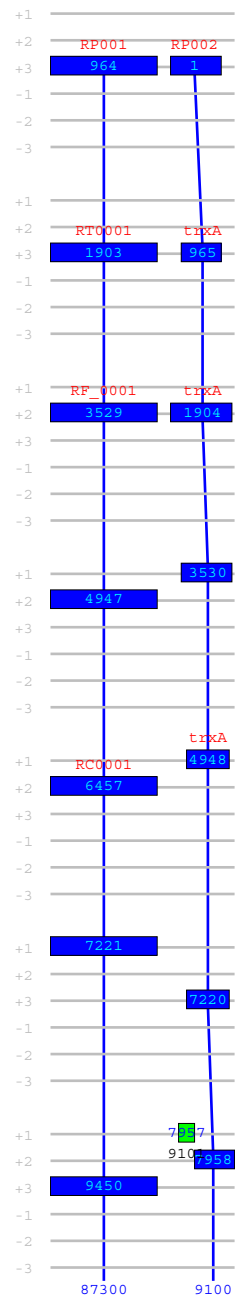

- 1 Rickettsia prowazekii str. Madrid E, complete genome
- 2 Rickettsia typhi str. wilmington, complete genome
- 3 Rickettsia felis URRWXCal2, complete genome
- 4 Rickettsia akari str. Hartford chromosome, whole genome shotgun sequence
- 5 Rickettsia conorii str. Malish 7, complete genome
- 6 Rickettsia sibirica 246 rsib\_agnrcr, whole genome shotgun sequence
- 7 Rickettsia rickettsii chromosome, whole genome shotgun sequence

Reg\_id: 544

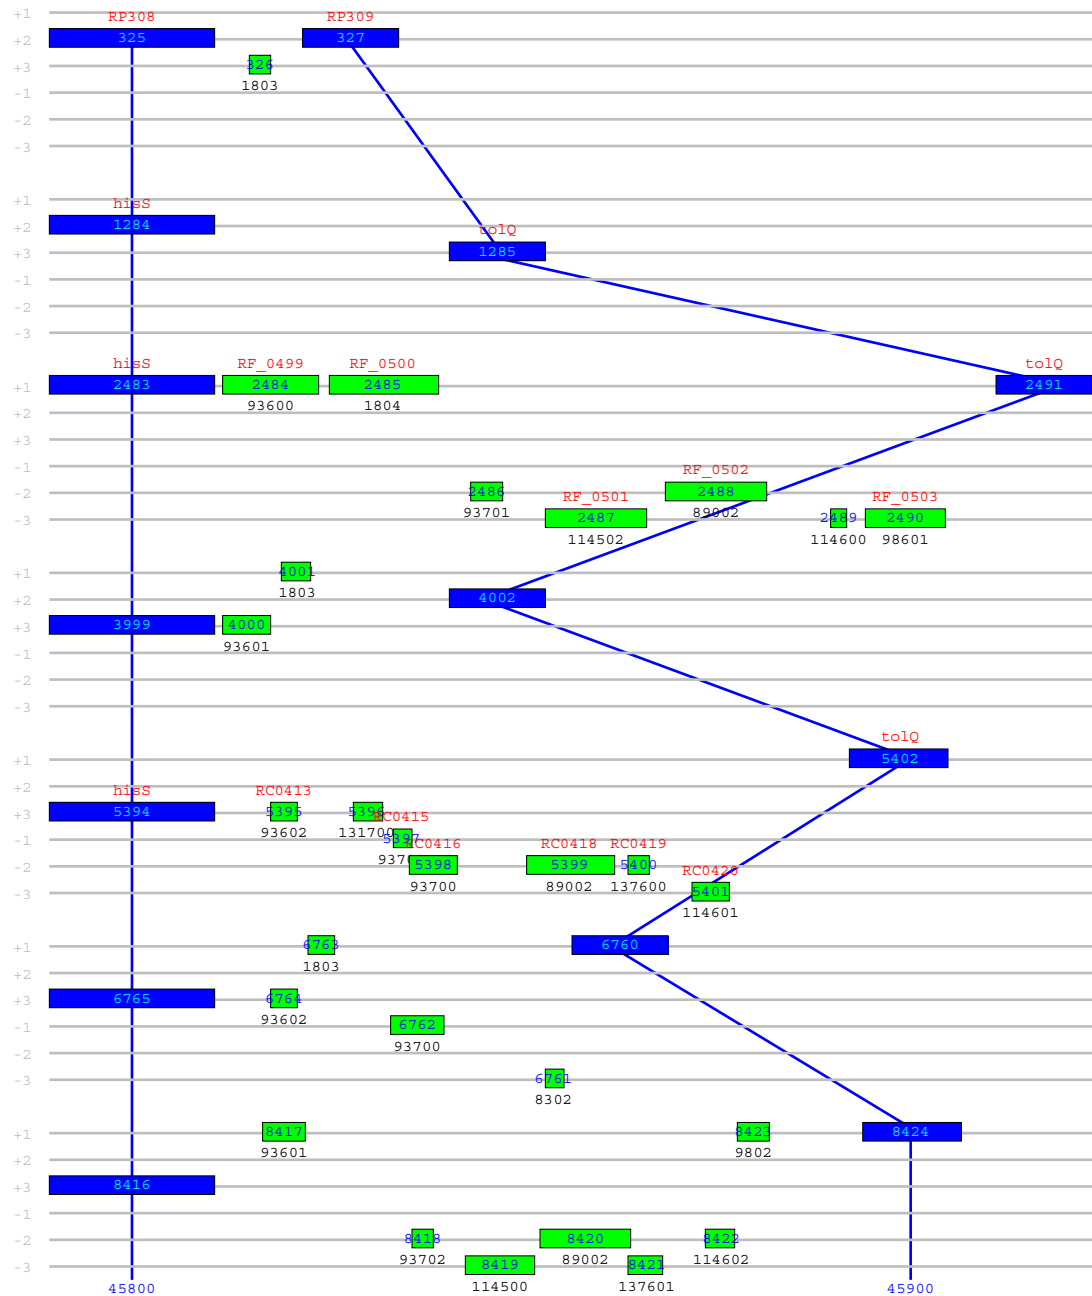

- 1 Rickettsia prowazekii str. Madrid E, complete genome
- 2 Rickettsia typhi str. wilmington, complete genome
- 3 Rickettsia felis URRWXCal2, complete genome
- 4 Rickettsia akari str. Hartford chromosome, whole genome shotgun sequence
- 5 Rickettsia conorii str. Malish 7, complete genome
- 6 Rickettsia sibirica 246 rsib\_agnrcr, whole genome shotgun sequence
- 7 Rickettsia rickettsii chromosome, whole genome shotgun sequence

Reg\_id: 546

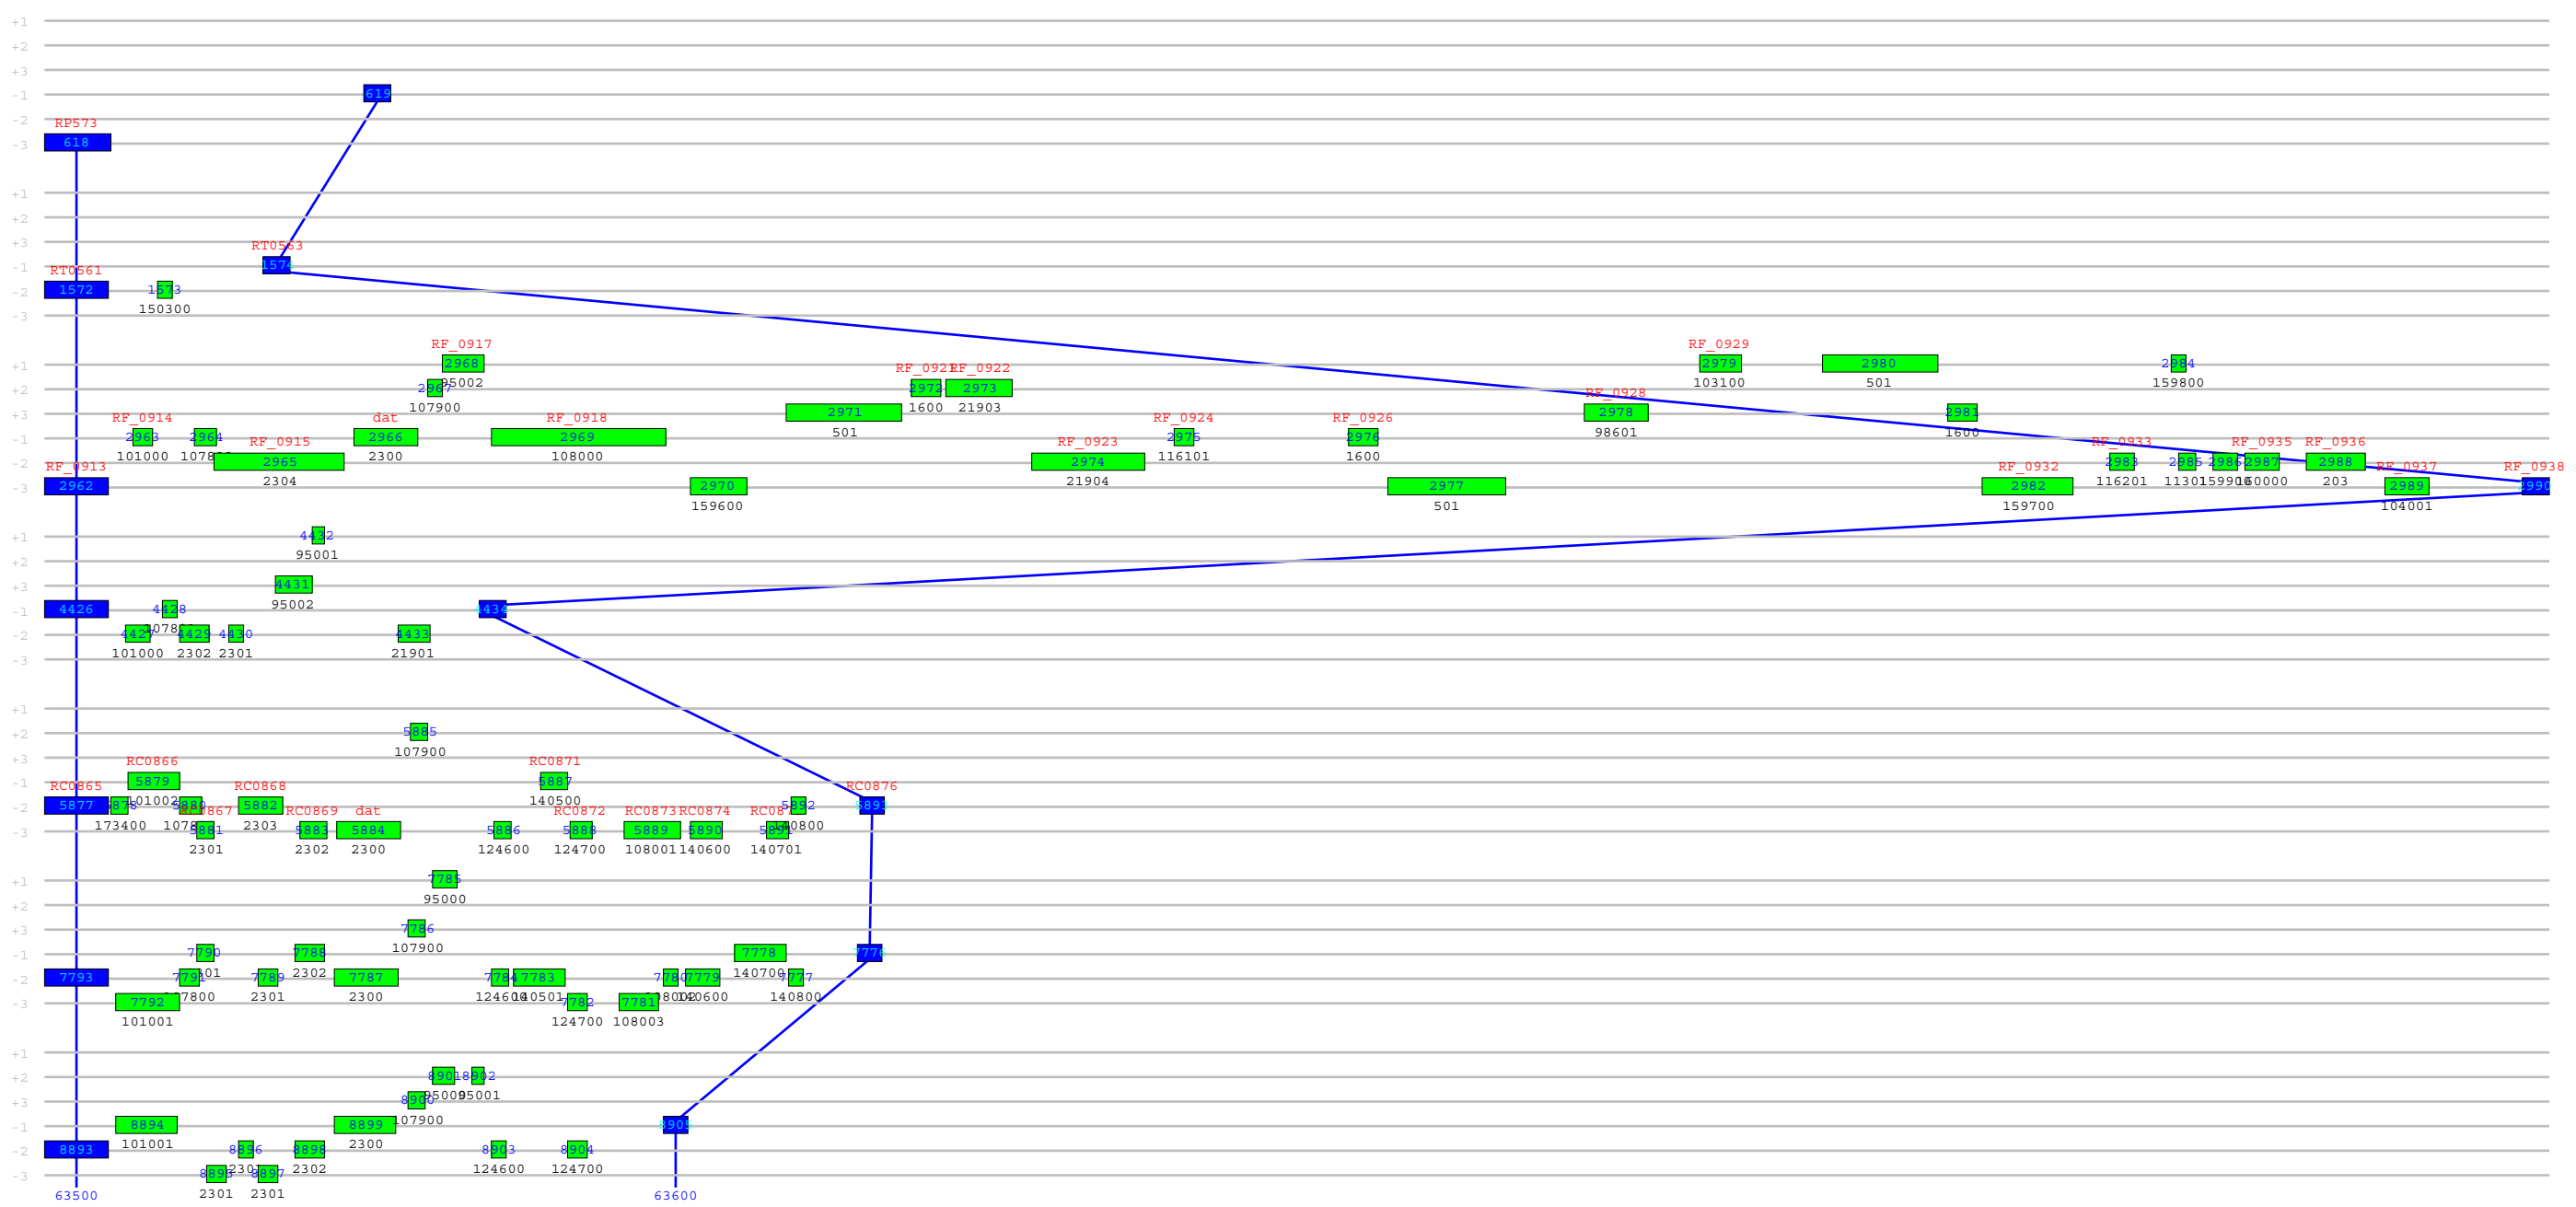

- 1 Rickettsia prowazekii str. Madrid E, complete genome
- 2 Rickettsia typhi str. wilmington, complete genome
- 3 Rickettsia felis URRWXCal2, complete genome
- 4 Rickettsia akari str. Hartford chromosome, whole genome shotgun sequence
- 5 Rickettsia conorii str. Malish 7, complete genome
- 6 Rickettsia sibirica 246 rsib\_agnrcr, whole genome shotgun sequence
- 7 Rickettsia rickettsii chromosome, whole genome shotgun sequence

Reg\_id: 547

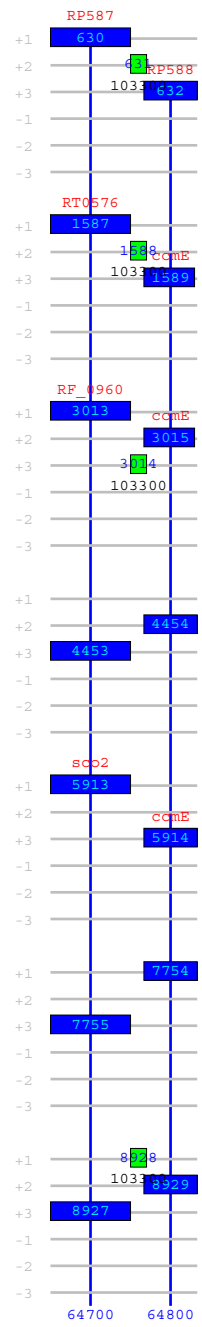

- 1 Rickettsia prowazekii str. Madrid E, complete genome
- 2 Rickettsia typhi str. wilmington, complete genome
- 3 Rickettsia felis URRWXCal2, complete genome
- 4 Rickettsia akari str. Hartford chromosome, whole genome shotgun sequence
- 5 Rickettsia conorii str. Malish 7, complete genome
- 6 Rickettsia sibirica 246 rsib\_agnrct, whole genome shotgun sequence
- 7 Rickettsia rickettsii chromosome, whole genome shotgun sequence

Reg\_id: 550

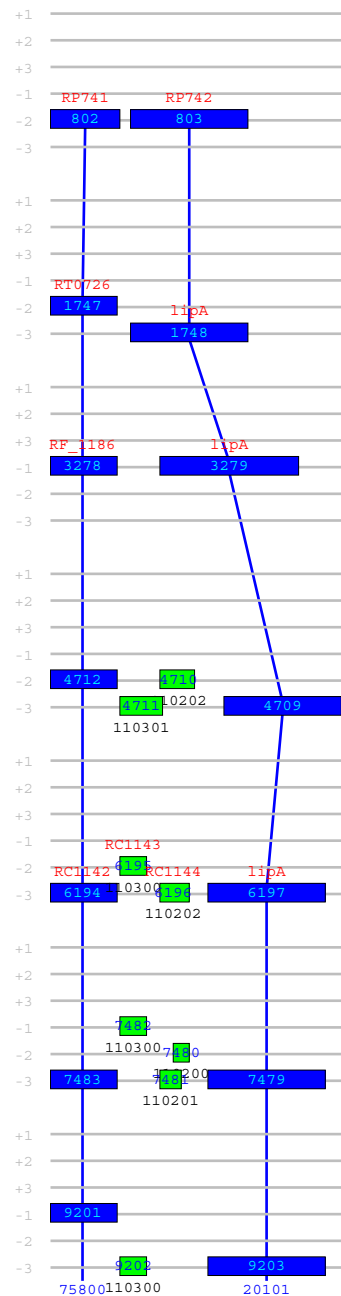



1 Rickettsia prowazekii str. Madrid E, complete genome  
 2 Rickettsia typhi str. wilmington, complete genome  
 3 Rickettsia felis URRWXCal2, complete genome  
 4 Rickettsia akari str. Hartford chromosome, whole genome shotgun sequence  
 5 Rickettsia conorii str. Malish 7, complete genome  
 6 Rickettsia sibirica 246 rsib\_agnrcr, whole genome shotgun sequence  
 7 Rickettsia rickettsii chromosome, whole genome shotgun sequence

Reg\_id: 551

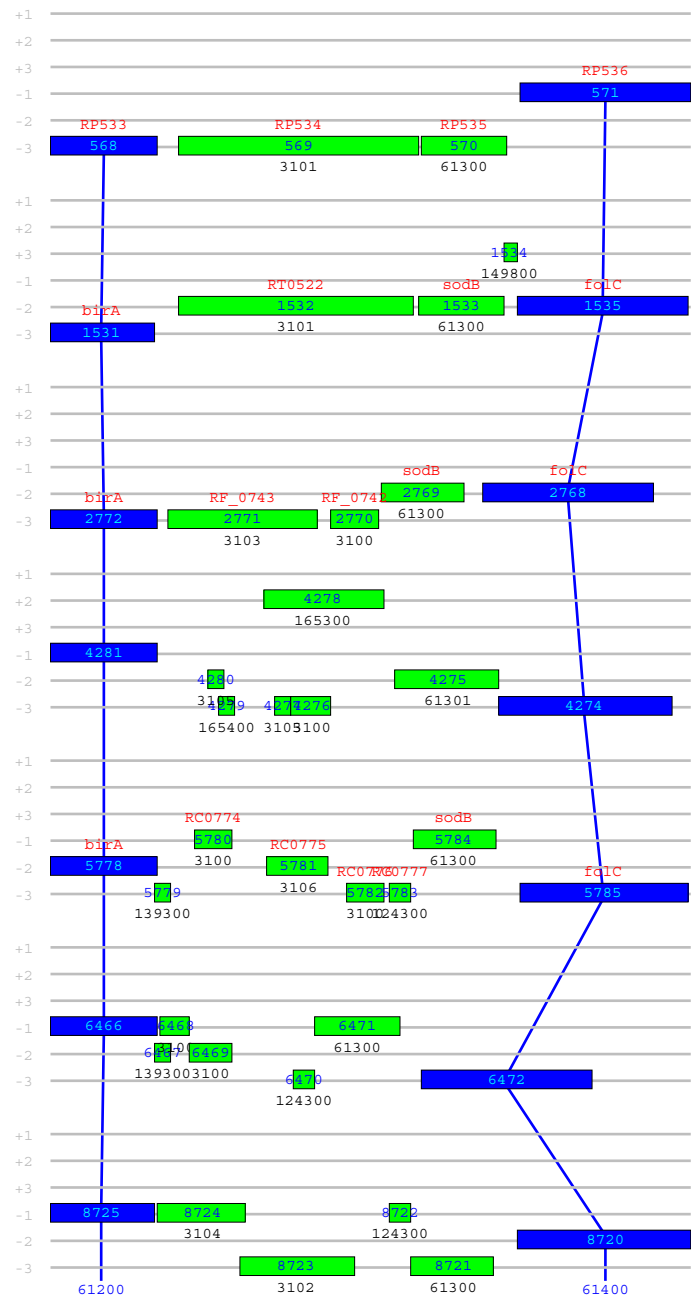

- 1 Rickettsia prowazekii str. Madrid E, complete genome
- 2 Rickettsia typhi str. wilmington, complete genome
- 3 Rickettsia felis URRWXCal2, complete genome
- 4 Rickettsia akari str. Hartford chromosome, whole genome shotgun sequence
- 5 Rickettsia conorii str. Malish 7, complete genome
- 6 Rickettsia sibirica 246 rsib\_agnrcr, whole genome shotgun sequence
- 7 Rickettsia rickettsii chromosome, whole genome shotgun sequence

Reg\_id: 552

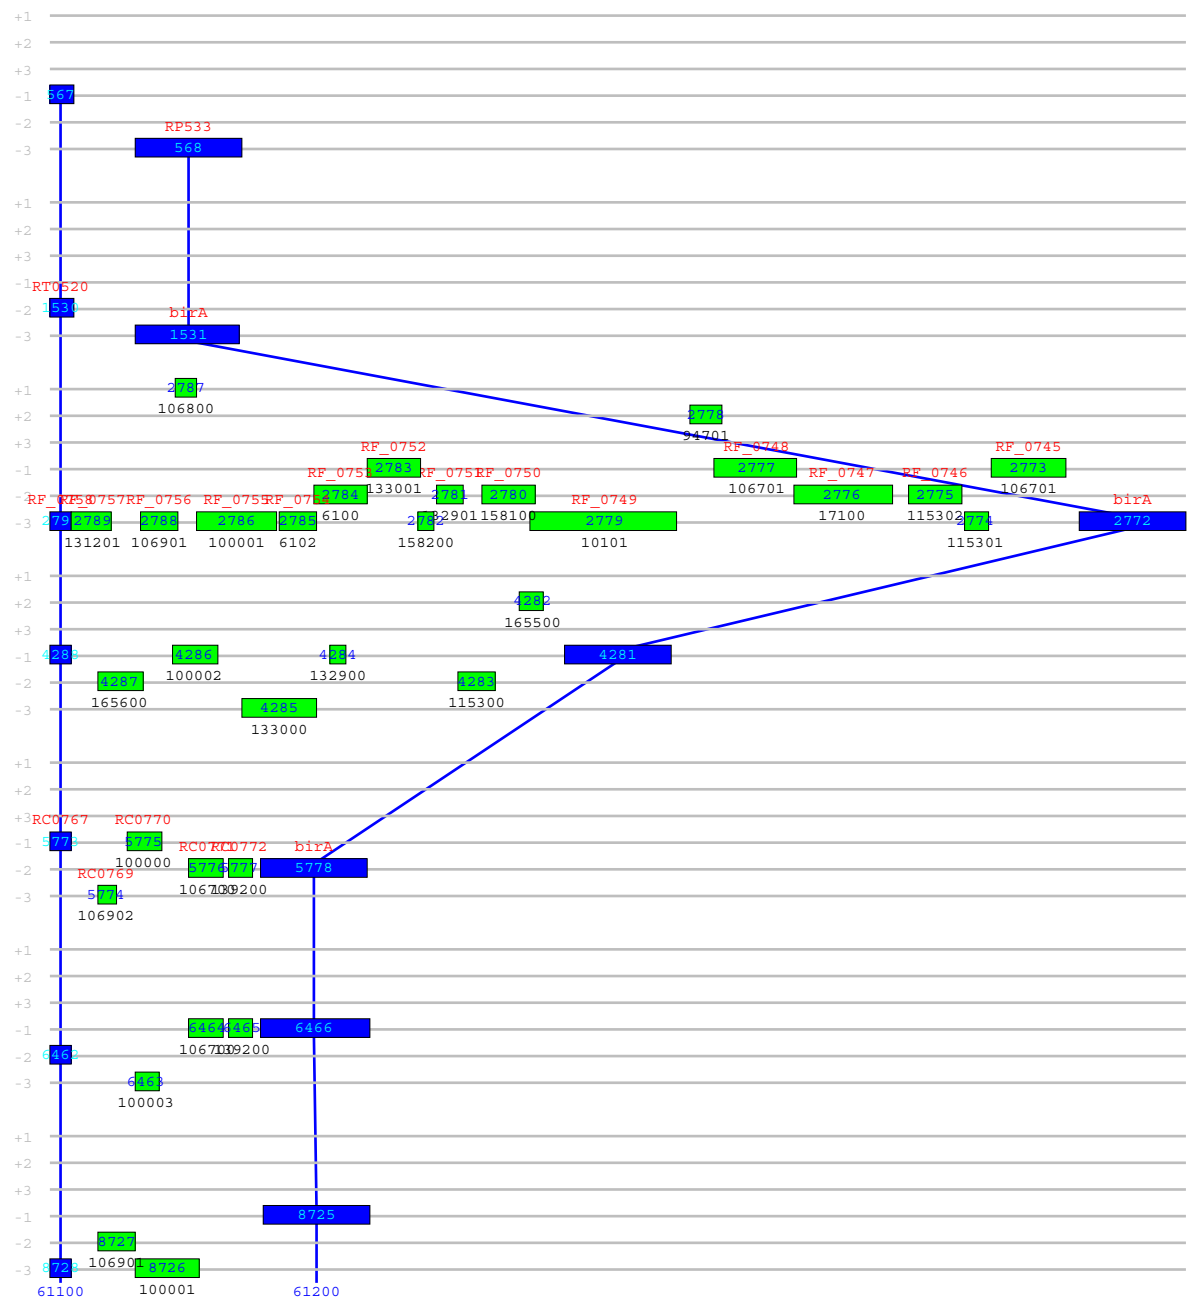

- 1 Rickettsia prowazekii str. Madrid E, complete genome
- 2 Rickettsia typhi str. wilmington, complete genome
- 3 Rickettsia felis URRWXCal2, complete genome
- 4 Rickettsia akari str. Hartford chromosome, whole genome shotgun sequence
- 5 Rickettsia conorii str. Malish 7, complete genome
- 6 Rickettsia sibirica 246 rsib\_agnrcr, whole genome shotgun sequence
- 7 Rickettsia rickettsii chromosome, whole genome shotgun sequence

Reg\_id: 555

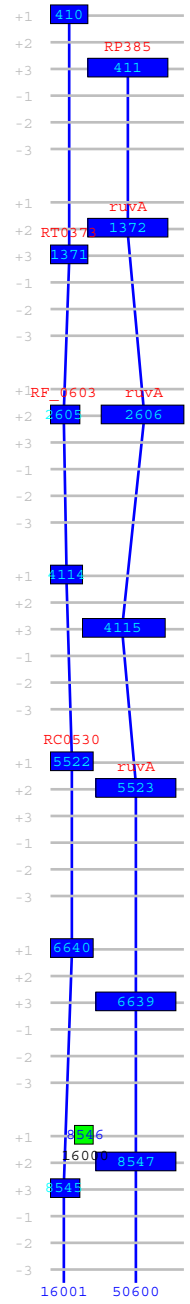

1 Rickettsia prowazekii str. Madrid E, complete genome  
 2 Rickettsia typhi str. wilmington, complete genome  
 3 Rickettsia felis URRWXCal2, complete genome  
 4 Rickettsia akari str. Hartford chromosome, whole genome shotgun sequence  
 5 Rickettsia conorii str. Malish 7, complete genome  
 6 Rickettsia sibirica 246 rsib\_agnrcr, whole genome shotgun sequence  
 7 Rickettsia rickettsii chromosome, whole genome shotgun sequence

Reg\_id: 560

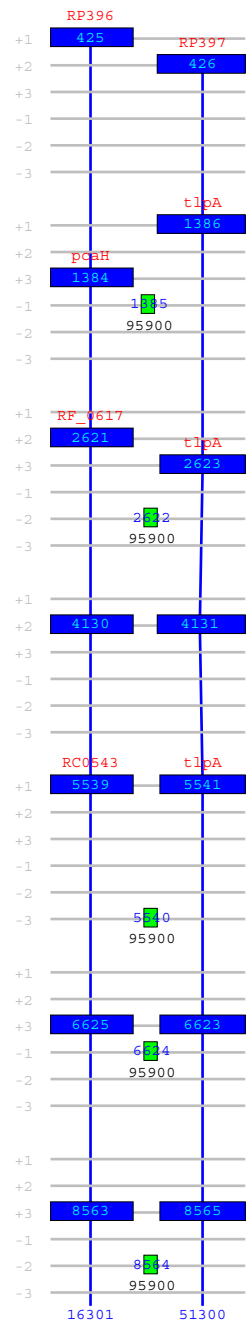

- 1 Rickettsia prowazekii str. Madrid E, complete genome
- 2 Rickettsia typhi str. wilmington, complete genome
- 3 Rickettsia felis URRWXCal2, complete genome
- 4 Rickettsia akari str. Hartford chromosome, whole genome shotgun sequence
- 5 Rickettsia conorii str. Malish 7, complete genome
- 6 Rickettsia sibirica 246 rsib\_agnrcr, whole genome shotgun sequence
- 7 Rickettsia rickettsii chromosome, whole genome shotgun sequence

Reg\_id: 562

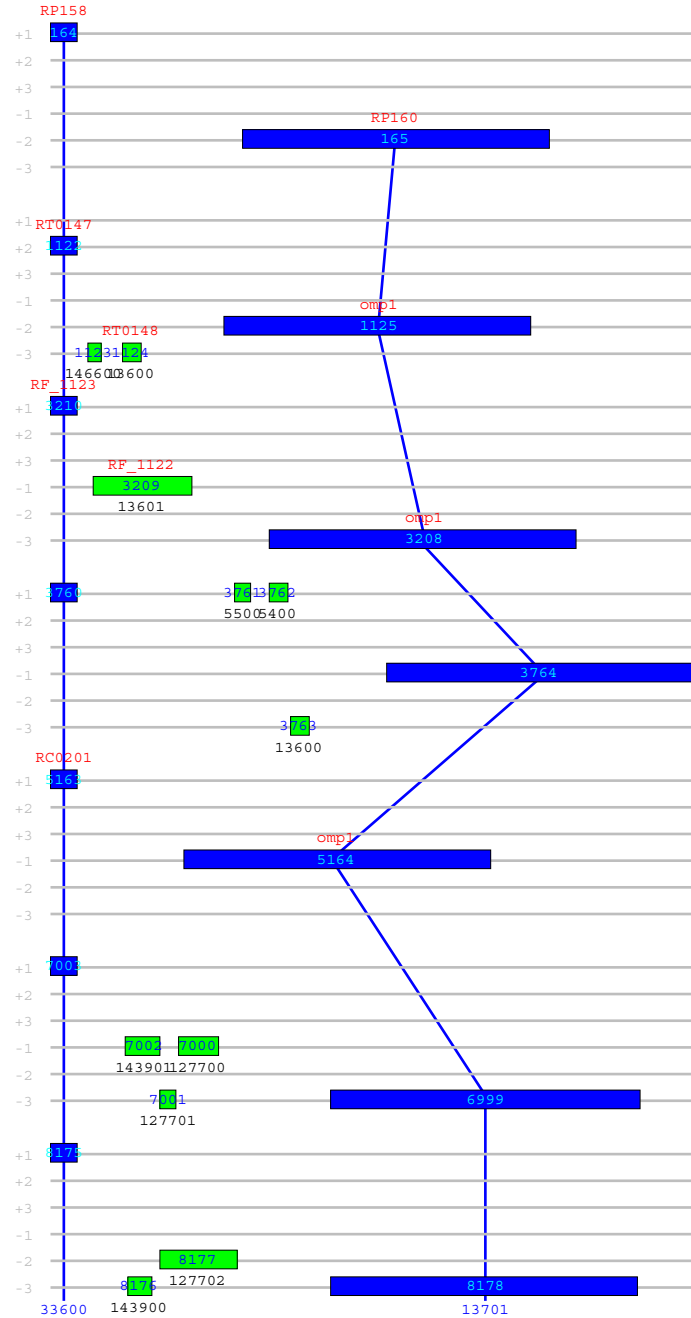



1 Rickettsia prowazekii str. Madrid E, complete genome  
 2 Rickettsia typhi str. wilmington, complete genome  
 3 Rickettsia felis URRWXCal2, complete genome  
 4 Rickettsia akari str. Hartford chromosome, whole genome shotgun sequence  
 5 Rickettsia conorii str. Malish 7, complete genome  
 6 Rickettsia sibirica 246 rsib\_agnrcr, whole genome shotgun sequence  
 7 Rickettsia rickettsii chromosome, whole genome shotgun sequence

Reg\_id: 565

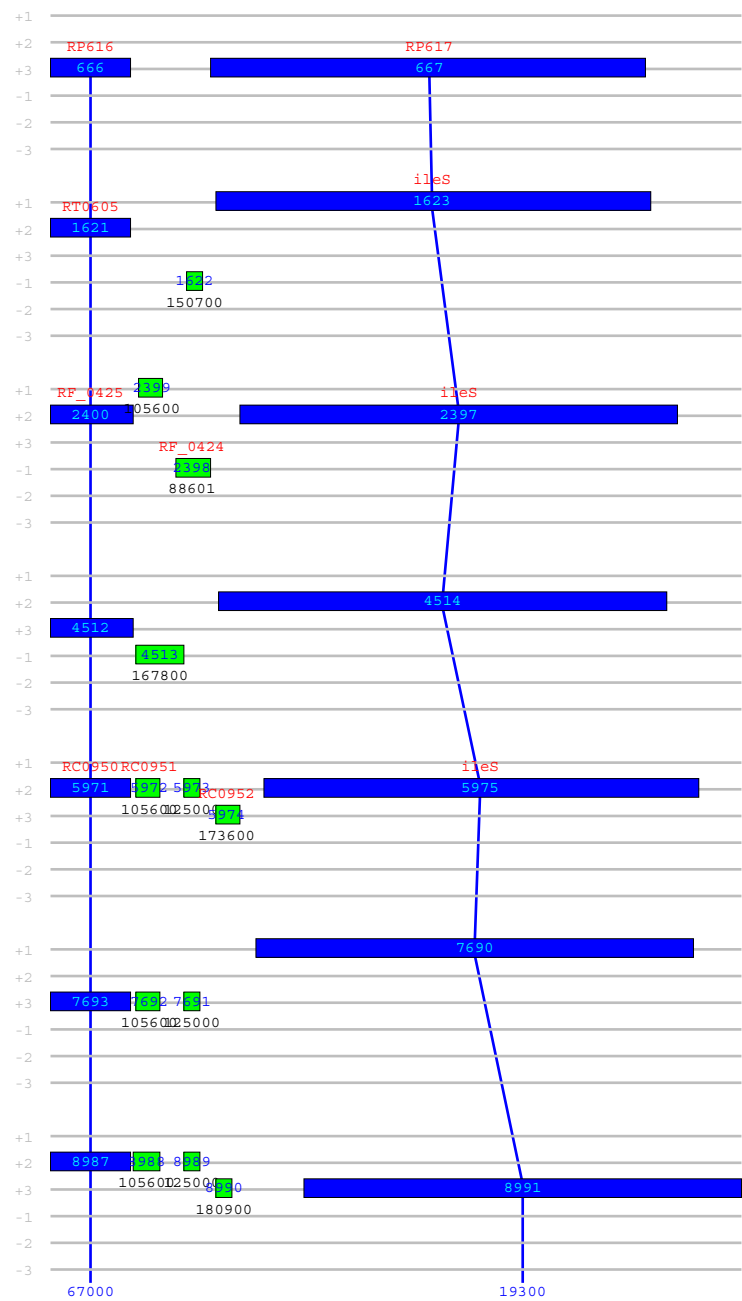

1 Rickettsia prowazekii str. Madrid E, complete genome  
 2 Rickettsia typhi str. wilmington, complete genome  
 3 Rickettsia felis URRWXCal2, complete genome  
 4 Rickettsia akari str. Hartford chromosome, whole genome shotgun sequence  
 5 Rickettsia conorii str. Malish 7, complete genome  
 6 Rickettsia sibirica 246 rsib\_agnrct, whole genome shotgun sequence  
 7 Rickettsia rickettsii chromosome, whole genome shotgun sequence

Reg\_id: 570

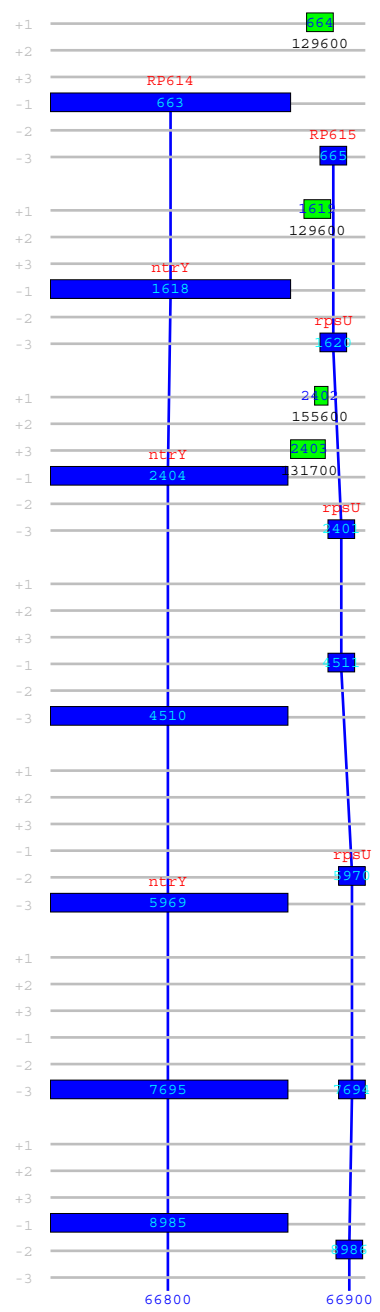



1 Rickettsia prowazekii str. Madrid E, complete genome  
 2 Rickettsia typhi str. wilmington, complete genome  
 3 Rickettsia felis URRWXCal2, complete genome  
 4 Rickettsia akari str. Hartford chromosome, whole genome shotgun sequence  
 5 Rickettsia conorii str. Malish 7, complete genome  
 6 Rickettsia sibirica 246 rsib\_agnrcr, whole genome shotgun sequence  
 7 Rickettsia rickettsii chromosome, whole genome shotgun sequence

Reg\_id: 571

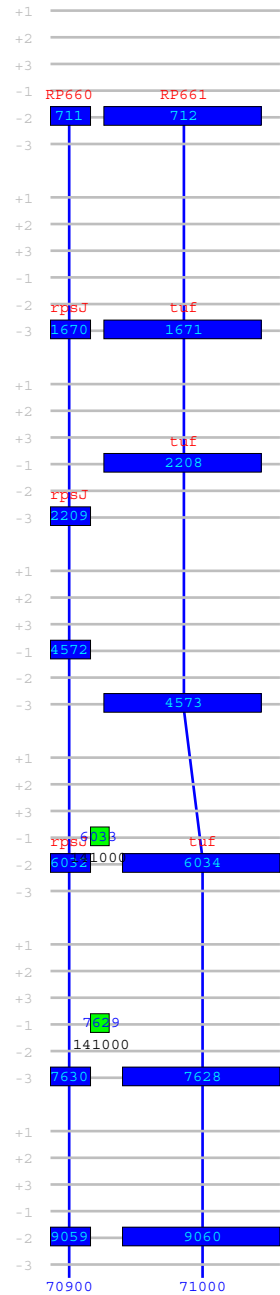

1 Rickettsia prowazekii str. Madrid E, complete genome  
 2 Rickettsia typhi str. wilmington, complete genome  
 3 Rickettsia felis URRWXCal2, complete genome  
 4 Rickettsia akari str. Hartford chromosome, whole genome shotgun sequence  
 5 Rickettsia conorii str. Malish 7, complete genome  
 6 Rickettsia sibirica 246 rsib\_agnrct, whole genome shotgun sequence  
 7 Rickettsia rickettsii chromosome, whole genome shotgun sequence

Reg\_id: 574

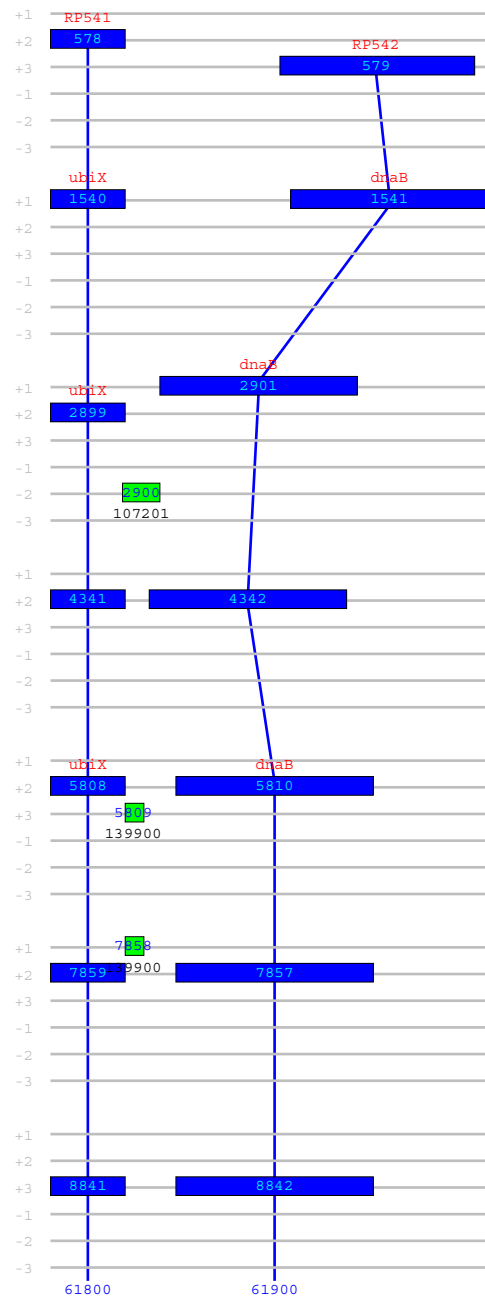

1 Rickettsia prowazekii str. Madrid E, complete genome  
 2 Rickettsia typhi str. wilmington, complete genome  
 3 Rickettsia felis URRWXCal2, complete genome  
 4 Rickettsia akari str. Hartford chromosome, whole genome shotgun sequence  
 5 Rickettsia conorii str. Malish 7, complete genome  
 6 Rickettsia sibirica 246 rsib\_agnrcr, whole genome shotgun sequence  
 7 Rickettsia rickettsii chromosome, whole genome shotgun sequence

Reg\_id: 576

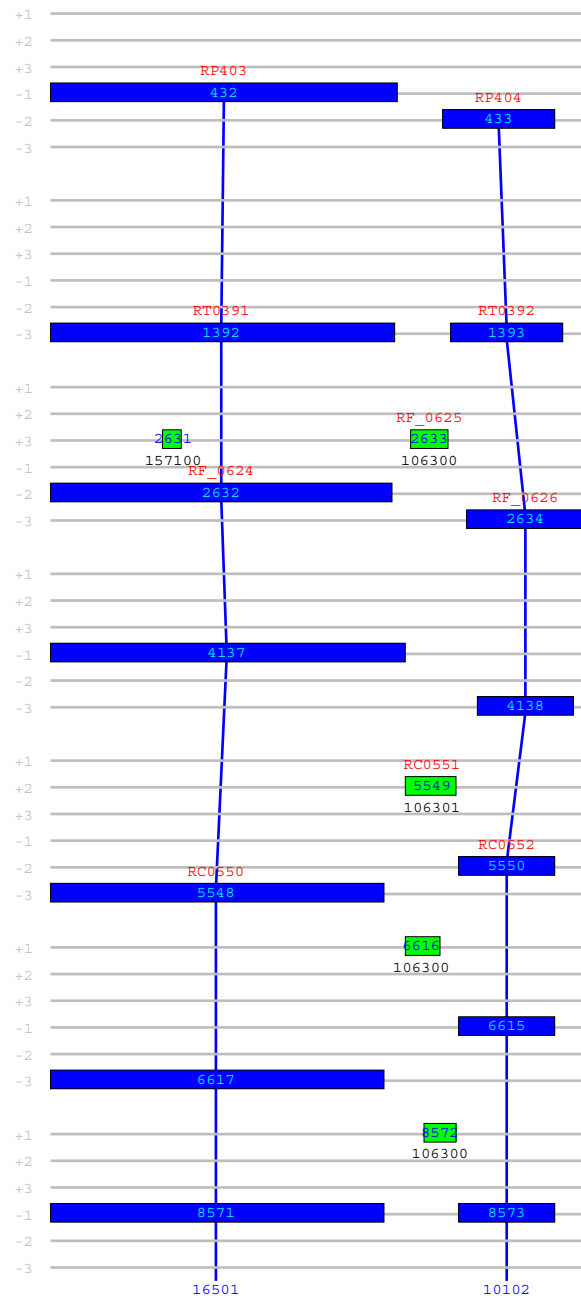

1 Rickettsia prowazekii str. Madrid E, complete genome  
 2 Rickettsia typhi str. wilmington, complete genome  
 3 Rickettsia felis URRWXCal2, complete genome  
 4 Rickettsia akari str. Hartford chromosome, whole genome shotgun sequence  
 5 Rickettsia conorii str. Malish 7, complete genome  
 6 Rickettsia sibirica 246 rsib\_agnrcr, whole genome shotgun sequence  
 7 Rickettsia rickettsii chromosome, whole genome shotgun sequence

Reg\_id: 577

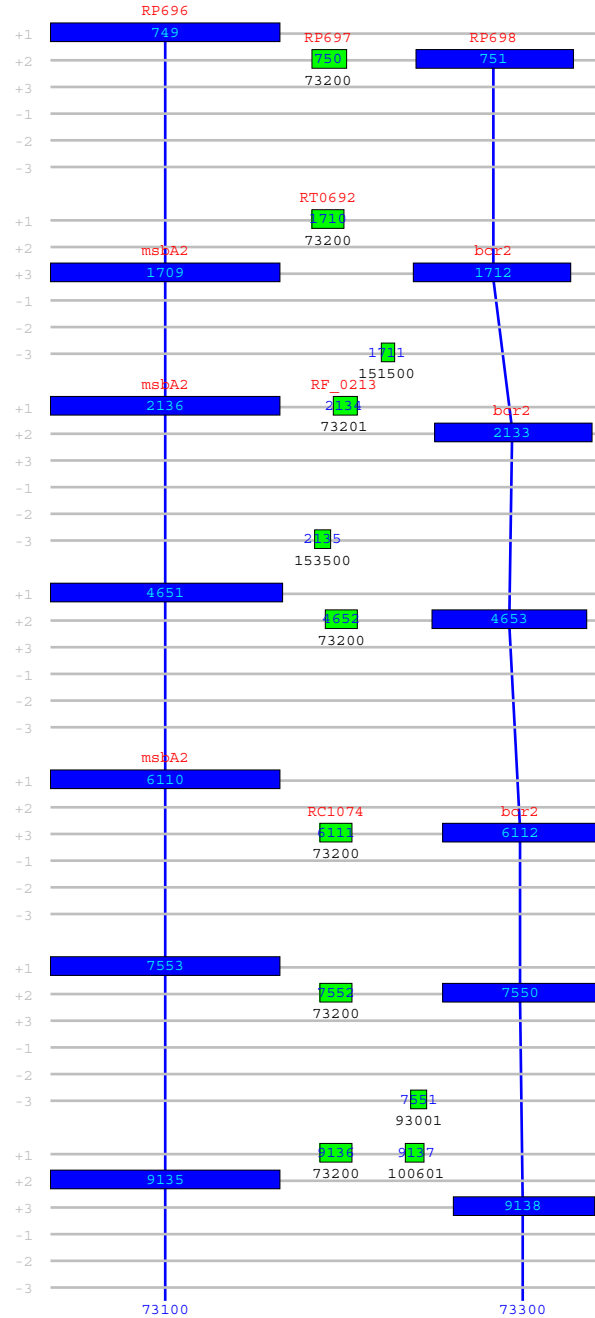

- 1 Rickettsia prowazekii str. Madrid E, complete genome
- 2 Rickettsia typhi str. wilmington, complete genome
- 3 Rickettsia felis URRWXCal2, complete genome
- 4 Rickettsia akari str. Hartford chromosome, whole genome shotgun sequence
- 5 Rickettsia conorii str. Malish 7, complete genome
- 6 Rickettsia sibirica 246 rsib\_agnrcr, whole genome shotgun sequence
- 7 Rickettsia rickettsii chromosome, whole genome shotgun sequence

Reg\_id: 581

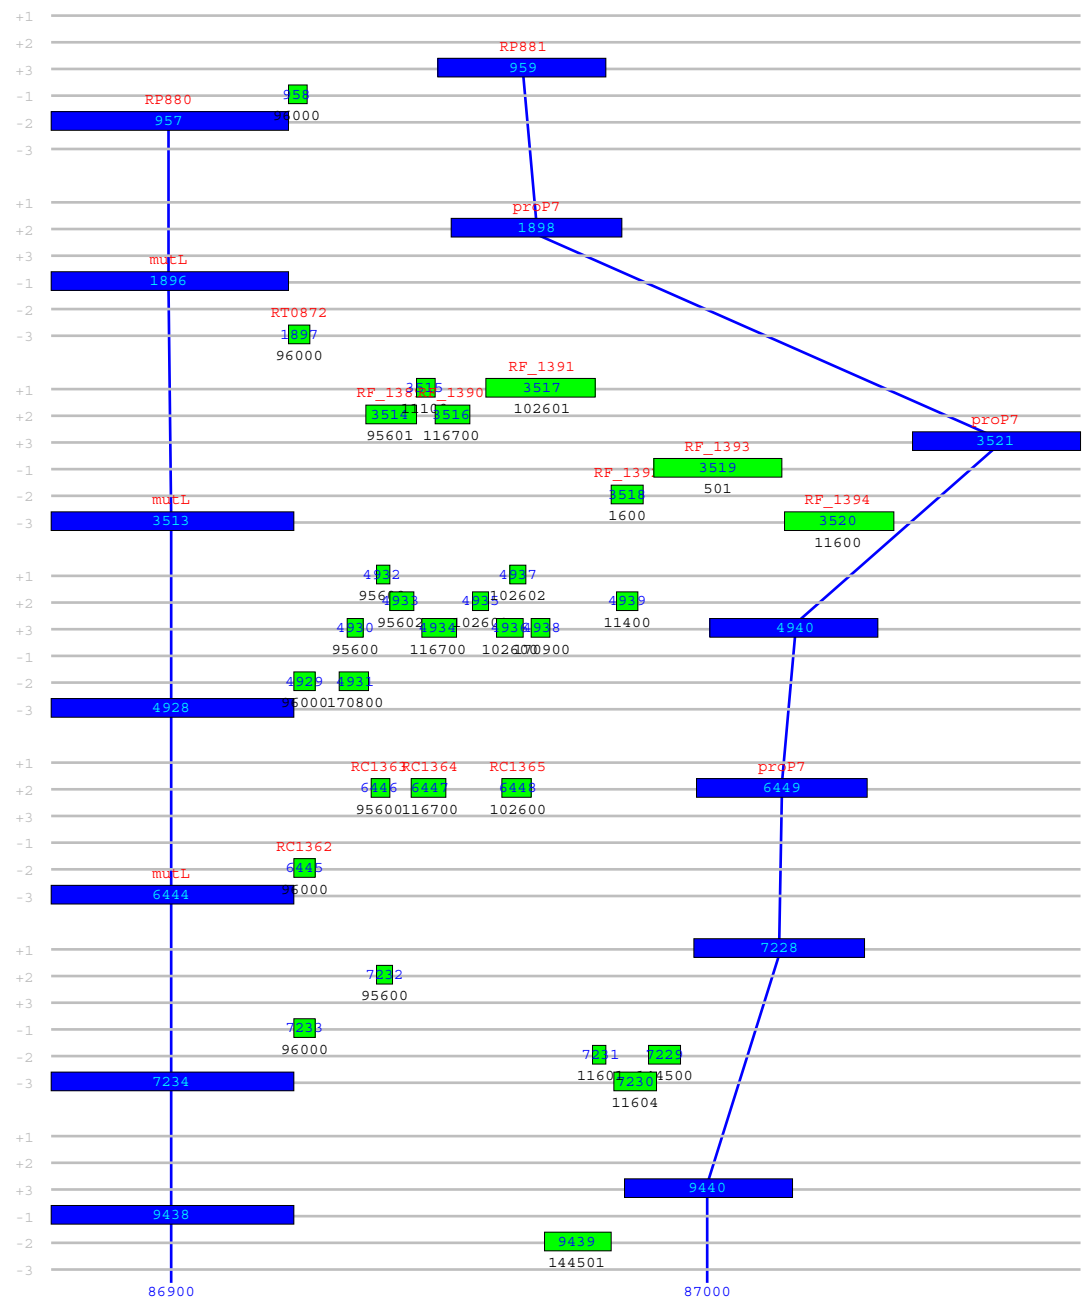

1 Rickettsia prowazekii str. Madrid E, complete genome  
 2 Rickettsia typhi str. wilmington, complete genome  
 3 Rickettsia felis URRWXCal2, complete genome  
 4 Rickettsia akari str. Hartford chromosome, whole genome shotgun sequence  
 5 Rickettsia conorii str. Malish 7, complete genome  
 6 Rickettsia sibirica 246 rsib\_agnrcr, whole genome shotgun sequence  
 7 Rickettsia rickettsii chromosome, whole genome shotgun sequence

Reg\_id: 584

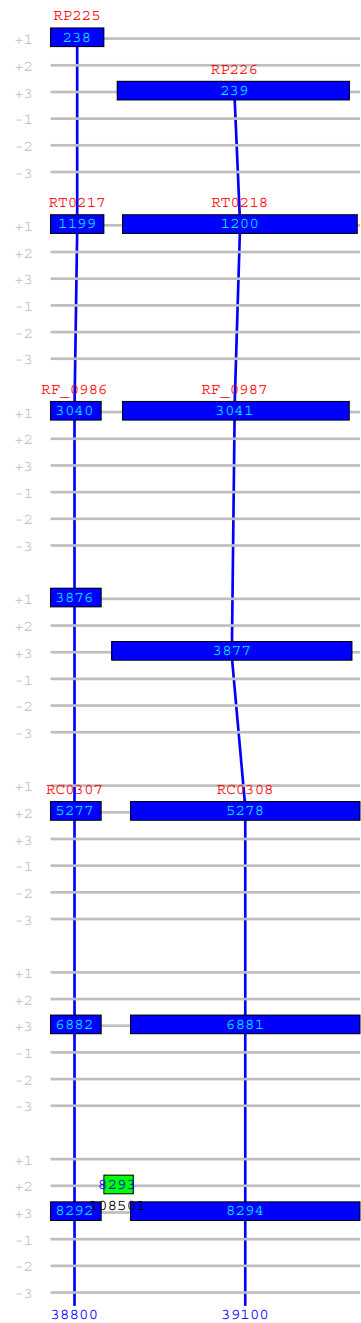

1 Rickettsia prowazekii str. Madrid E, complete genome  
 2 Rickettsia typhi str. wilmington, complete genome  
 3 Rickettsia felis URRWXCal2, complete genome  
 4 Rickettsia akari str. Hartford chromosome, whole genome shotgun sequence  
 5 Rickettsia conorii str. Malish 7, complete genome  
 6 Rickettsia sibirica 246 rsib\_agnrct, whole genome shotgun sequence  
 7 Rickettsia rickettsii chromosome, whole genome shotgun sequence

Reg\_id: 586

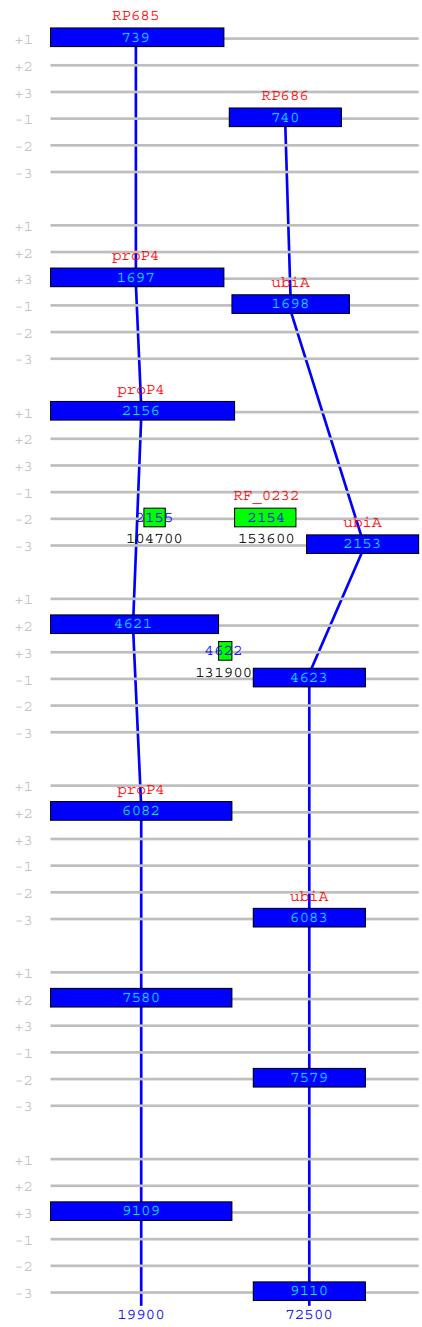

- 1 Rickettsia prowazekii str. Madrid E, complete genome
- 2 Rickettsia typhi str. wilmington, complete genome
- 3 Rickettsia felis URRWXCal2, complete genome
- 4 Rickettsia akari str. Hartford chromosome, whole genome shotgun sequence
- 5 Rickettsia conorii str. Malish 7, complete genome
- 6 Rickettsia sibirica 246 rsib\_agnrct, whole genome shotgun sequence
- 7 Rickettsia rickettsii chromosome, whole genome shotgun sequence

Reg\_id: 588

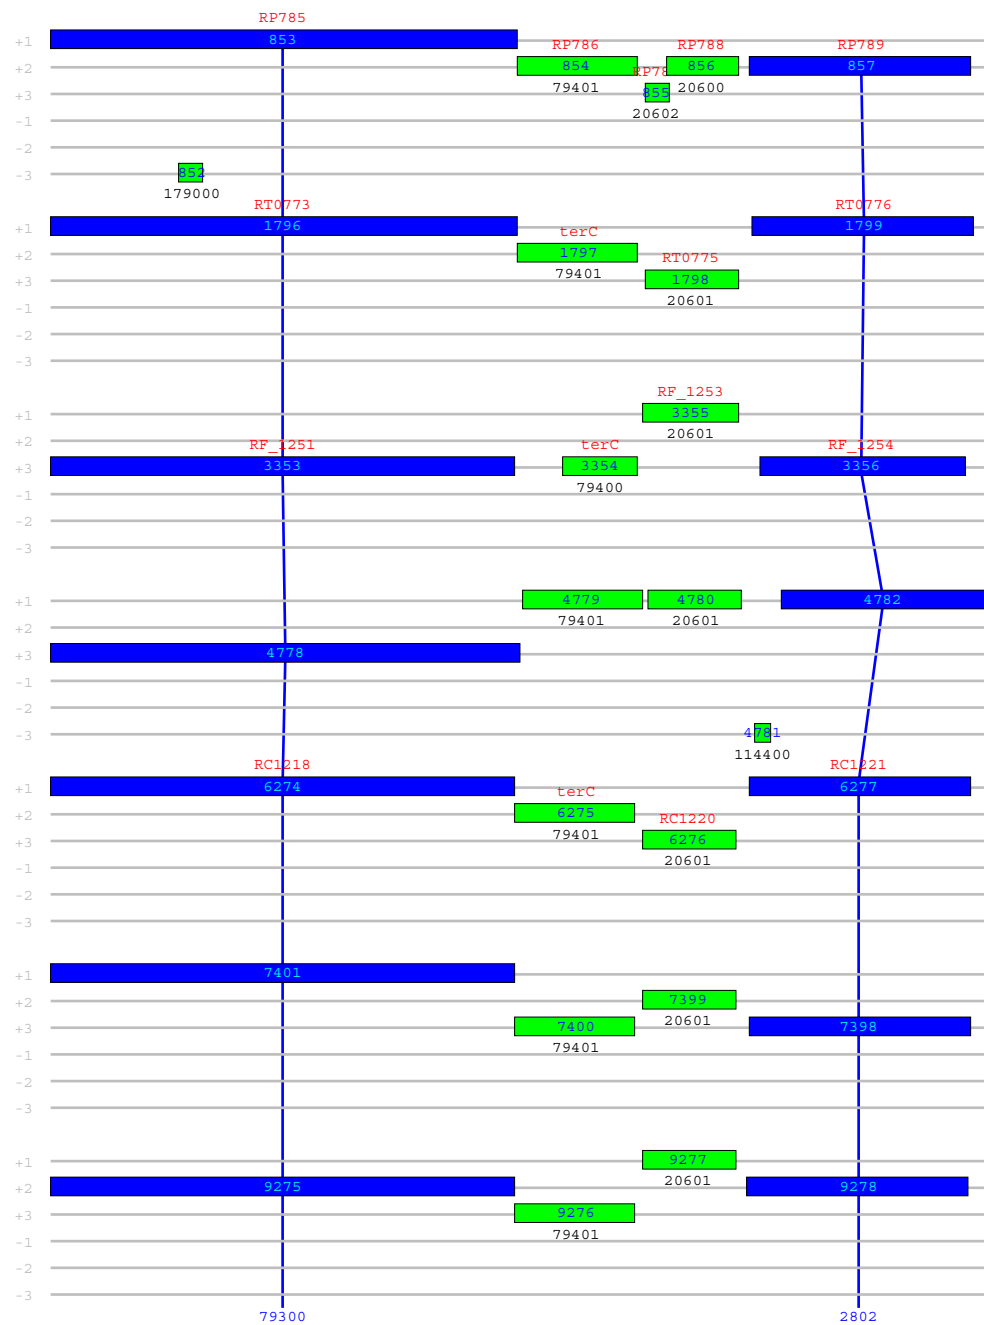



- 1 Rickettsia prowazekii str. Madrid E, complete genome
- 2 Rickettsia typhi str. wilmington, complete genome
- 3 Rickettsia felis URRWXCal2, complete genome
- 4 Rickettsia akari str. Hartford chromosome, whole genome shotgun sequence
- 5 Rickettsia conorii str. Malish 7, complete genome
- 6 Rickettsia sibirica 246 rsib\_agnrcr, whole genome shotgun sequence
- 7 Rickettsia rickettsii chromosome, whole genome shotgun sequence

Reg\_id: 589

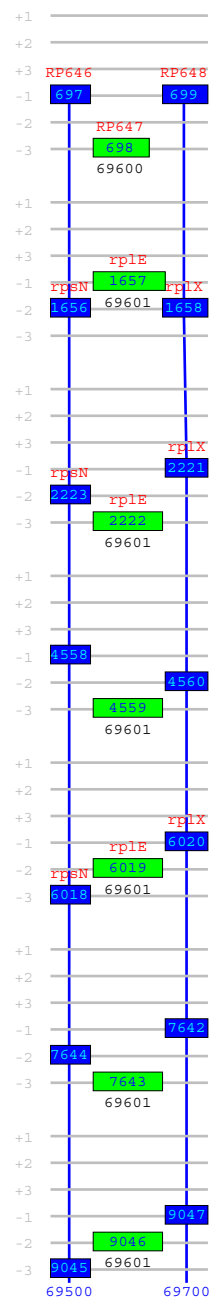

- 1 Rickettsia prowazekii str. Madrid E, complete genome
- 2 Rickettsia typhi str. wilmington, complete genome
- 3 Rickettsia felis URRWXCal2, complete genome
- 4 Rickettsia akari str. Hartford chromosome, whole genome shotgun sequence
- 5 Rickettsia conorii str. Malish 7, complete genome
- 6 Rickettsia sibirica 246 rsib\_agnrct, whole genome shotgun sequence
- 7 Rickettsia rickettsii chromosome, whole genome shotgun sequence

Reg\_id: 590

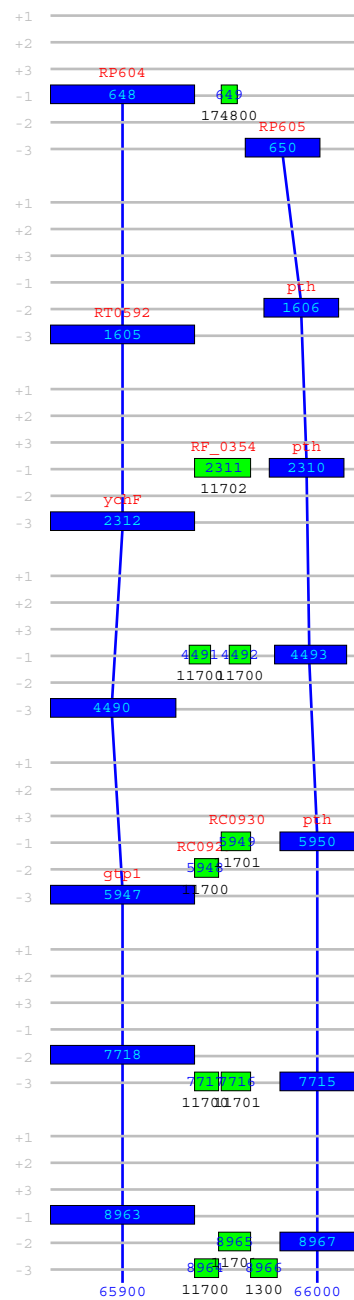

1 Rickettsia prowazekii str. Madrid E, complete genome  
 2 Rickettsia typhi str. wilmington, complete genome  
 3 Rickettsia felis URRWXCal2, complete genome  
 4 Rickettsia akari str. Hartford chromosome, whole genome shotgun sequence  
 5 Rickettsia conorii str. Malish 7, complete genome  
 6 Rickettsia sibirica 246 rsib\_agnrct, whole genome shotgun sequence  
 7 Rickettsia rickettsii chromosome, whole genome shotgun sequence

Reg\_id: 595

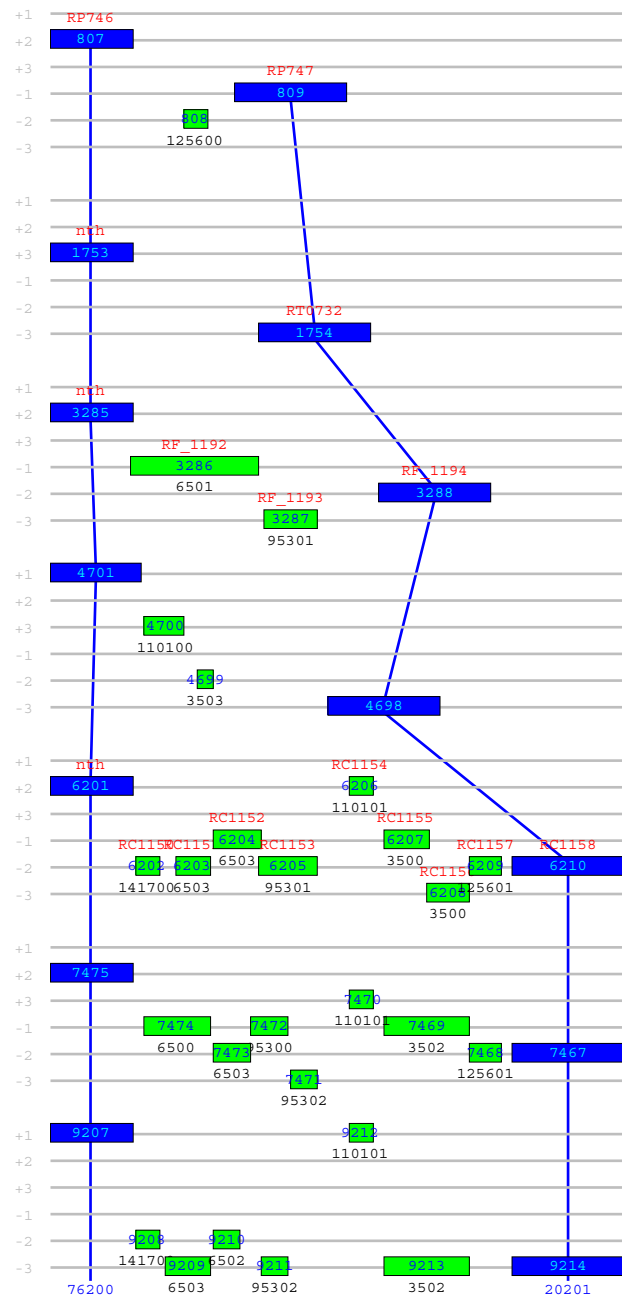

1 Rickettsia prowazekii str. Madrid E, complete genome  
 2 Rickettsia typhi str. wilmington, complete genome  
 3 Rickettsia felis URRWXCal2, complete genome  
 4 Rickettsia akari str. Hartford chromosome, whole genome shotgun sequence  
 5 Rickettsia conorii str. Malish 7, complete genome  
 6 Rickettsia sibirica 246 rsib\_agnrct, whole genome shotgun sequence  
 7 Rickettsia rickettsii chromosome, whole genome shotgun sequence

Reg\_id: 598

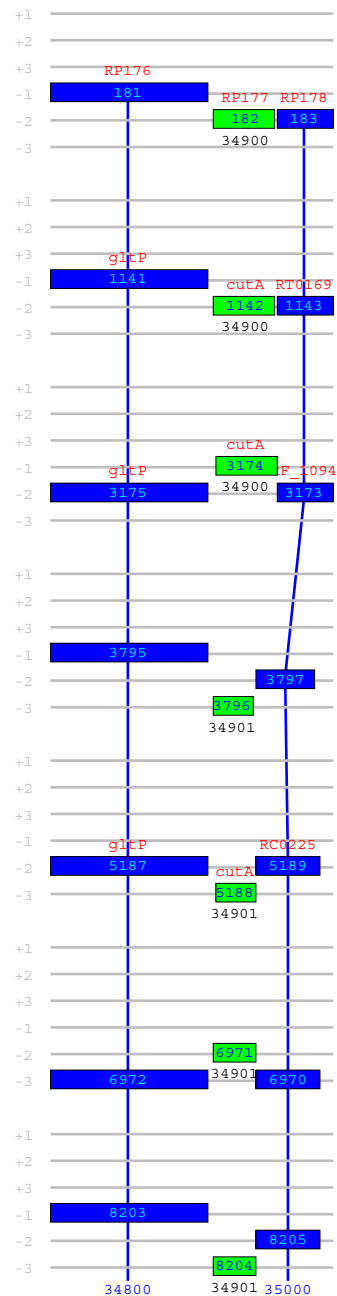

- 1 Rickettsia prowazekii str. Madrid E, complete genome
- 2 Rickettsia typhi str. wilington, complete genome
- 3 Rickettsia felis URRWXCal2, complete genome
- 4 Rickettsia akari str. Hartford chromosome, whole genome shotgun sequence
- 5 Rickettsia conorii str. Malish 7, complete genome
- 6 Rickettsia sibirica 246 rsib\_agnrcr, whole genome shotgun sequence
- 7 Rickettsia rickettsii chromosome, whole genome shotgun sequence

Reg\_id: 599

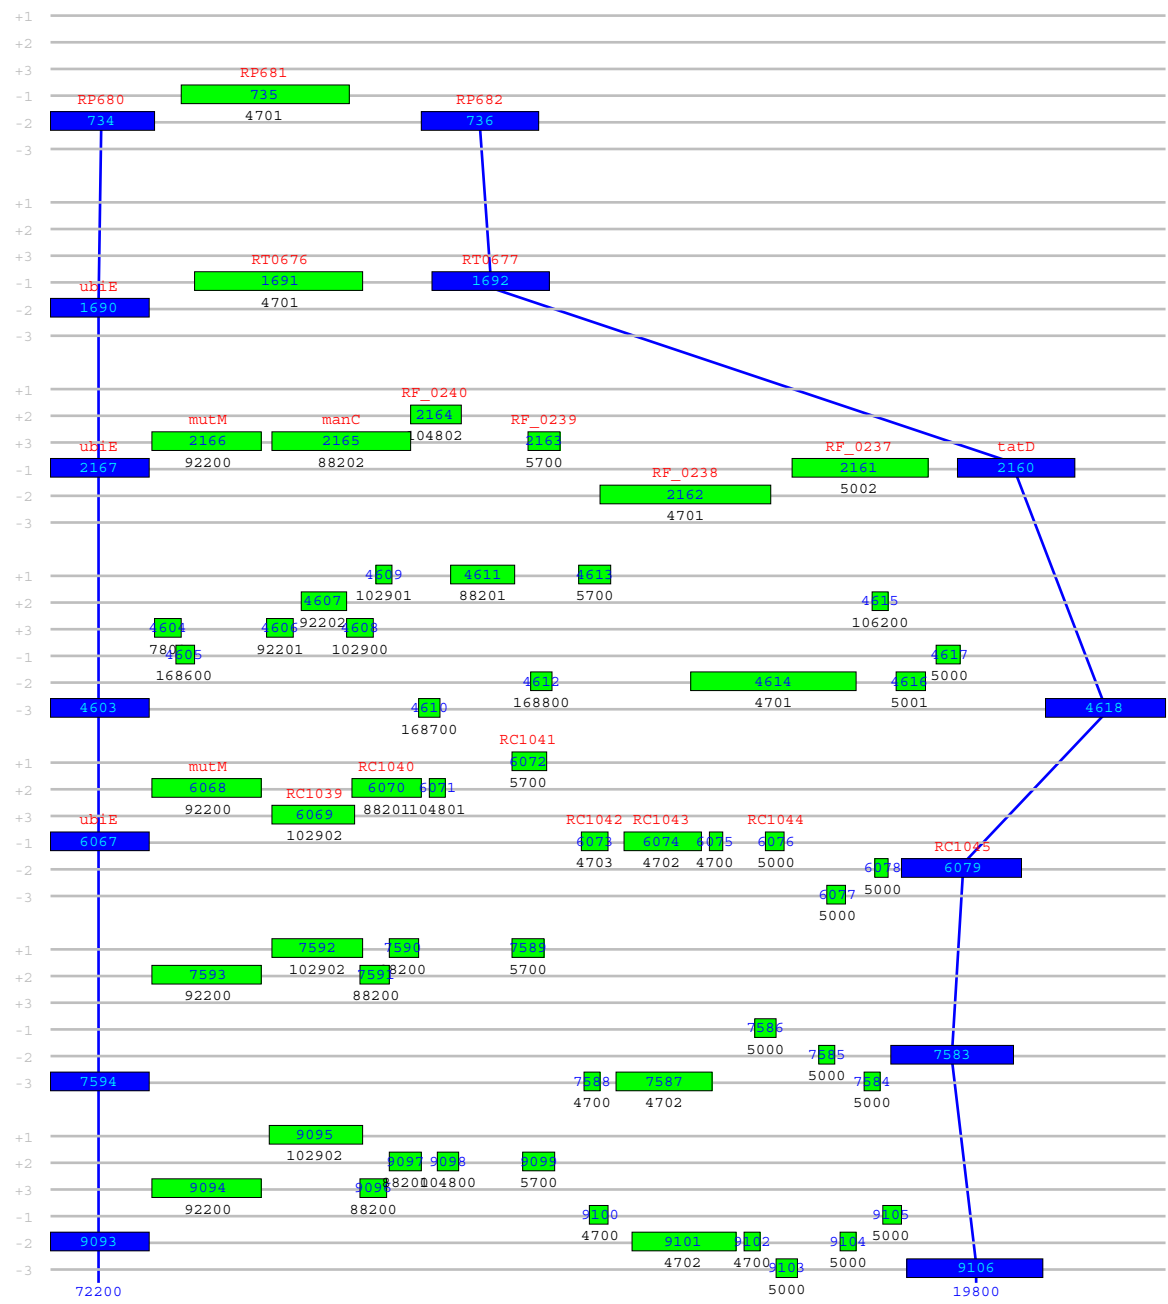

1 Rickettsia prowazekii str. Madrid E, complete genome  
 2 Rickettsia typhi str. wilmington, complete genome  
 3 Rickettsia felis URRWXCal2, complete genome  
 4 Rickettsia akari str. Hartford chromosome, whole genome shotgun sequence  
 5 Rickettsia conorii str. Malish 7, complete genome  
 6 Rickettsia sibirica 246 rsib\_agnrcr, whole genome shotgun sequence  
 7 Rickettsia rickettsii chromosome, whole genome shotgun sequence

Reg\_id: 601

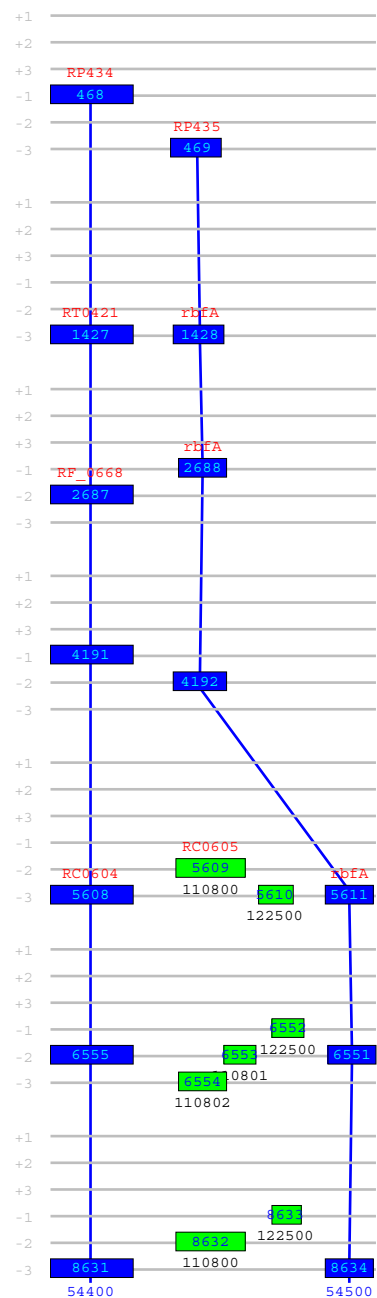

1 Rickettsia prowazekii str. Madrid E, complete genome  
 2 Rickettsia typhi str. wilmington, complete genome  
 3 Rickettsia felis URRWXCal2, complete genome  
 4 Rickettsia akari str. Hartford chromosome, whole genome shotgun sequence  
 5 Rickettsia conorii str. Malish 7, complete genome  
 6 Rickettsia sibirica 246 rsib\_agnrct, whole genome shotgun sequence  
 7 Rickettsia rickettsii chromosome, whole genome shotgun sequence

Reg\_id: 603

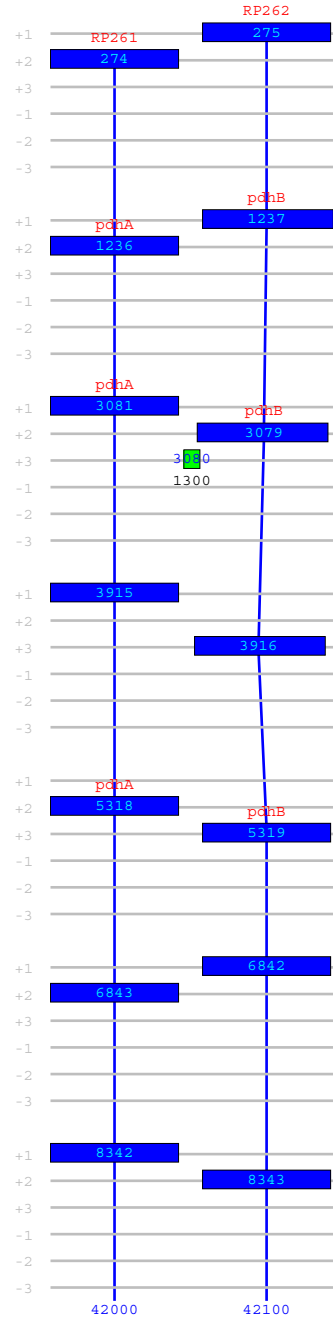

- 1 Rickettsia prowazekii str. Madrid E, complete genome
- 2 Rickettsia typhi str.wilmington, complete genome
- 3 Rickettsia felis URRWXCa12, complete genome
- 4 Rickettsia akari str. Hartford chromosome, whole genome shotgun sequence
- 5 Rickettsia conorii str. Malish 7, complete genome
- 6 Rickettsia sibirica 246 rsib agncrt, whole genome shotgun sequence
- 7 Rickettsia rickettsii chromosome, whole genome shotgun sequence

Reg\_id: 604

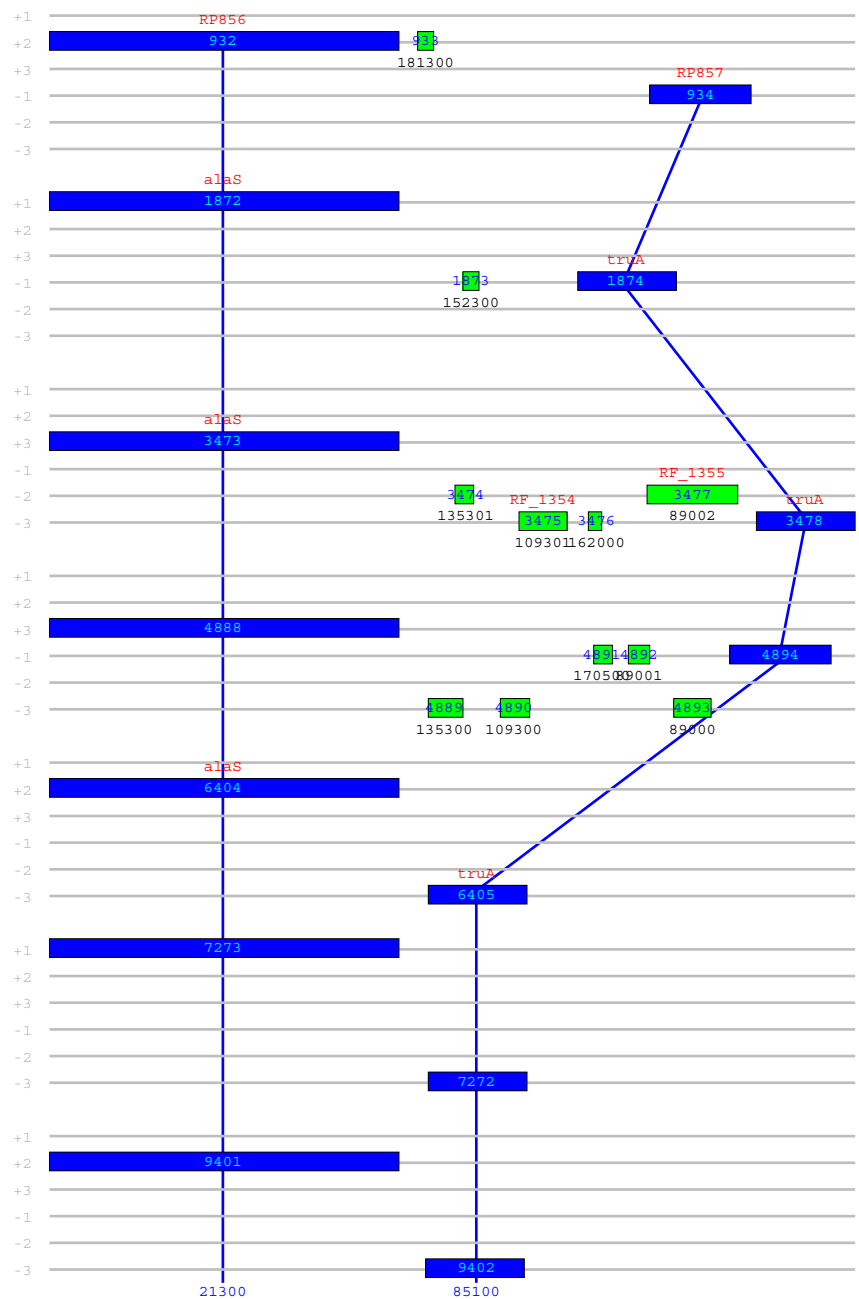



1 Rickettsia prowazekii str. Madrid E, complete genome  
 2 Rickettsia typhi str. wilmington, complete genome  
 3 Rickettsia felis URRWXCal2, complete genome  
 4 Rickettsia akari str. Hartford chromosome, whole genome shotgun sequence  
 5 Rickettsia conorii str. Malish 7, complete genome  
 6 Rickettsia sibirica 246 rsib\_agnrcr, whole genome shotgun sequence  
 7 Rickettsia rickettsii chromosome, whole genome shotgun sequence

Reg\_id: 605

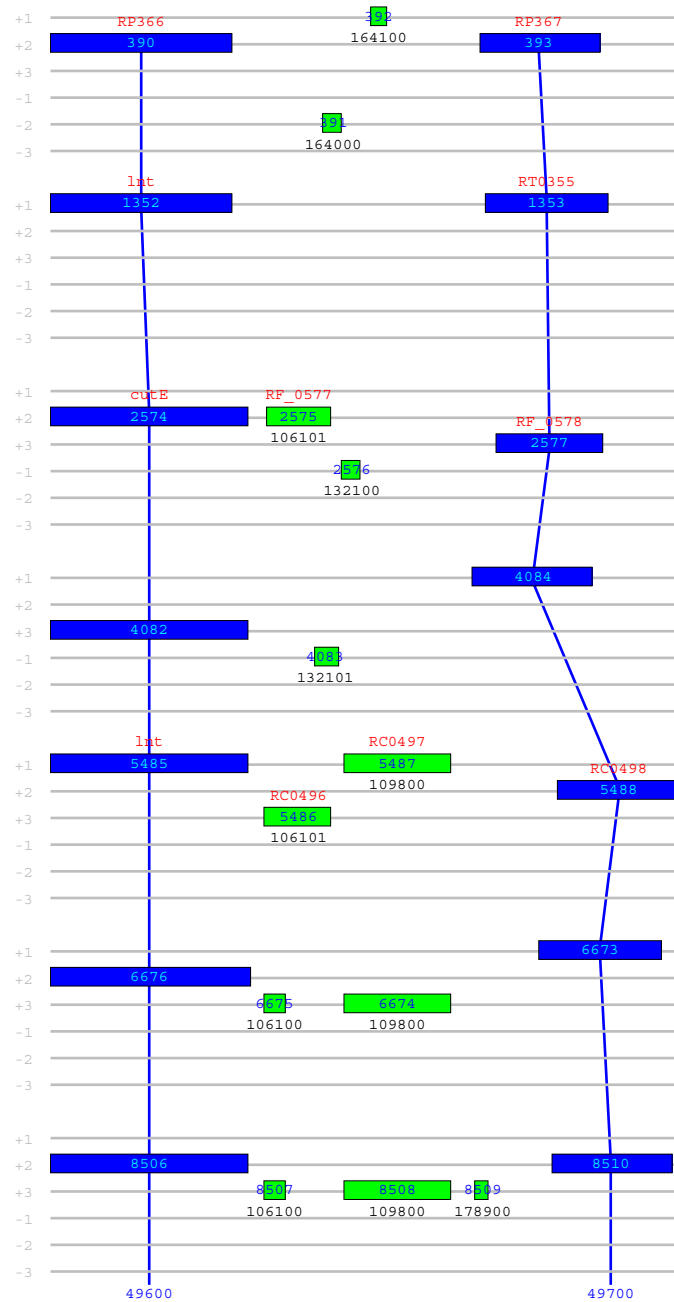

1 Rickettsia prowazekii str. Madrid E, complete genome  
 2 Rickettsia typhi str. wilmington, complete genome  
 3 Rickettsia felis URRWXCal2, complete genome  
 4 Rickettsia akari str. Hartford chromosome, whole genome shotgun sequence  
 5 Rickettsia conorii str. Malish 7, complete genome  
 6 Rickettsia sibirica 246 rsib\_agnrcr, whole genome shotgun sequence  
 7 Rickettsia rickettsii chromosome, whole genome shotgun sequence

Reg\_id: 606

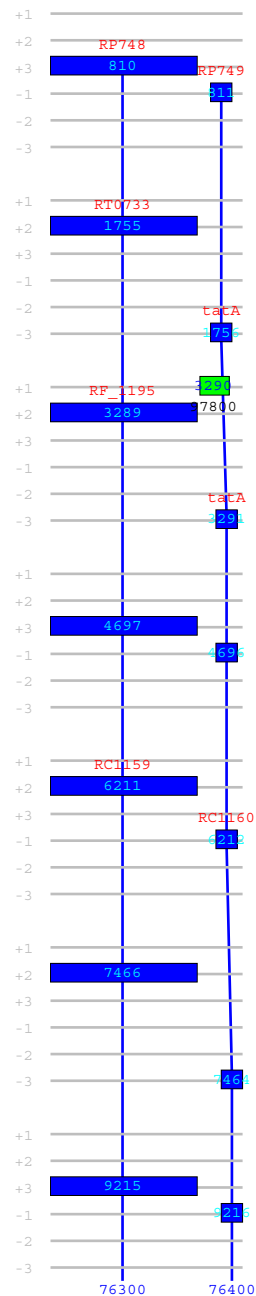

1 Rickettsia prowazekii str. Madrid E, complete genome  
 2 Rickettsia typhi str. wilmington, complete genome  
 3 Rickettsia felis URRWXCal2, complete genome  
 4 Rickettsia akari str. Hartford chromosome, whole genome shotgun sequence  
 5 Rickettsia conorii str. Malish 7, complete genome  
 6 Rickettsia sibirica 246 rsib\_agnrct, whole genome shotgun sequence  
 7 Rickettsia rickettsii chromosome, whole genome shotgun sequence

Reg\_id: 609

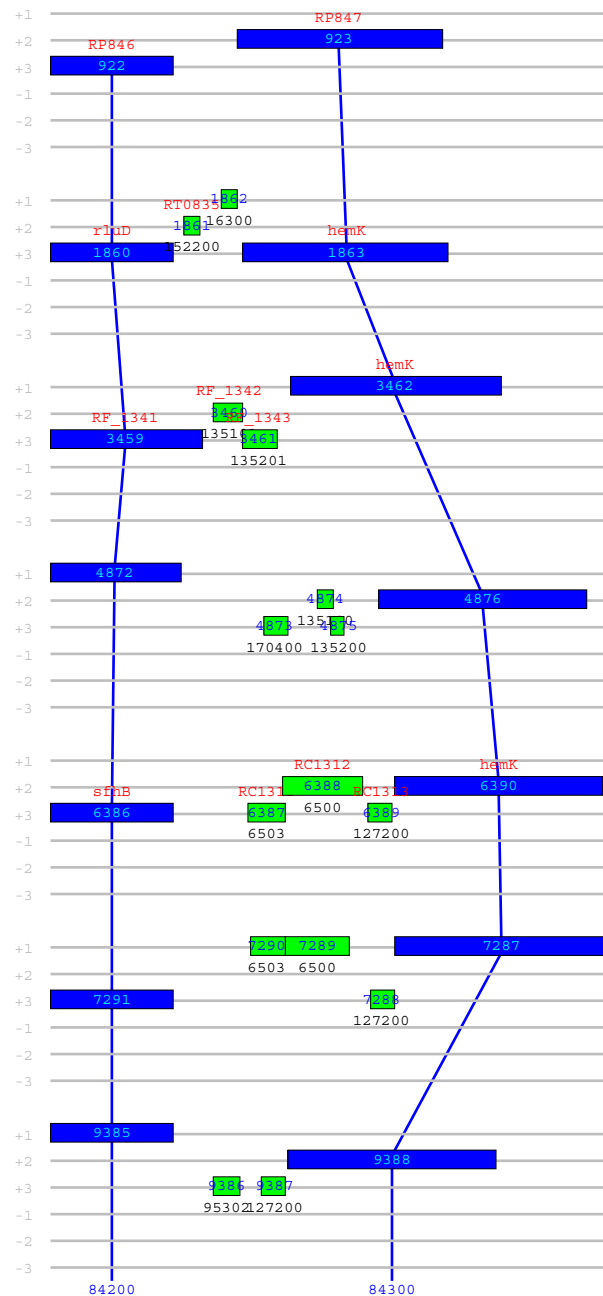

1 Rickettsia prowazekii str. Madrid E, complete genome  
 2 Rickettsia typhi str. wilmington, complete genome  
 3 Rickettsia felis URRWXCal2, complete genome  
 4 Rickettsia akari str. Hartford chromosome, whole genome shotgun sequence  
 5 Rickettsia conorii str. Malish 7, complete genome  
 6 Rickettsia sibirica 246 rsib\_agnrcr, whole genome shotgun sequence  
 7 Rickettsia rickettsii chromosome, whole genome shotgun sequence

Reg\_id: 610

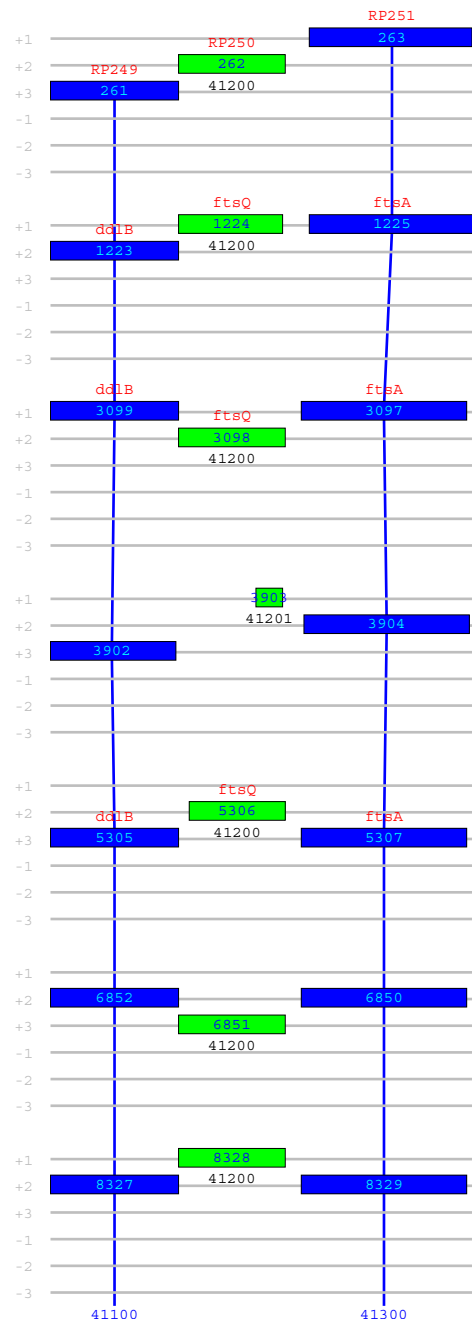

1 Rickettsia prowazekii str. Madrid E, complete genome  
 2 Rickettsia typhi str. wilmington, complete genome  
 3 Rickettsia felis URRWXCal2, complete genome  
 4 Rickettsia akari str. Hartford chromosome, whole genome shotgun sequence  
 5 Rickettsia conorii str. Malish 7, complete genome  
 6 Rickettsia sibirica 246 rsib\_agnrct, whole genome shotgun sequence  
 7 Rickettsia rickettsii chromosome, whole genome shotgun sequence

Reg\_id: 612

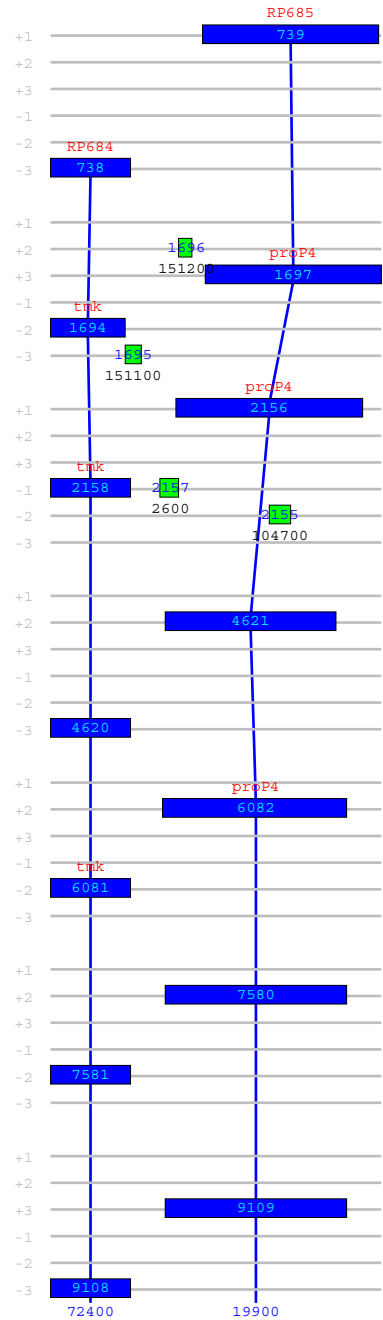

- 1 Rickettsia prowazekii str. Madrid E, complete genome
- 2 Rickettsia typhi str. wilmington, complete genome
- 3 Rickettsia felis URRWXCal2, complete genome
- 4 Rickettsia akari str. Hartford chromosome, whole genome shotgun sequence
- 5 Rickettsia conorii str. Malish 7, complete genome
- 6 Rickettsia sibirica 246 rsib\_agnrct, whole genome shotgun sequence
- 7 Rickettsia rickettsii chromosome, whole genome shotgun sequence

Reg\_id: 614

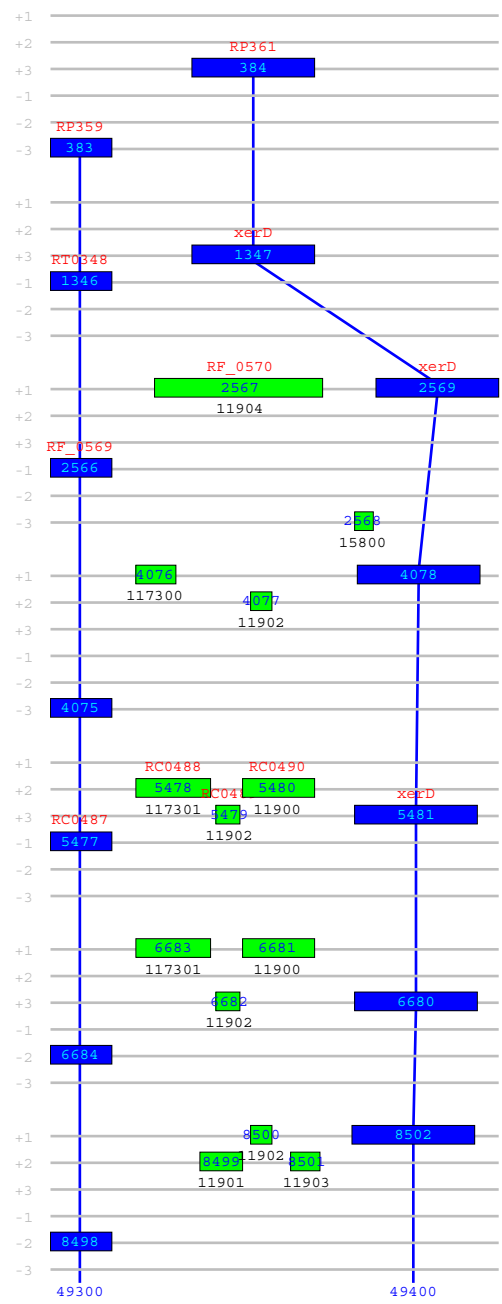

1 Rickettsia prowazekii str. Madrid E, complete genome  
 2 Rickettsia typhi str. wilmington, complete genome  
 3 Rickettsia felis URRWXCal2, complete genome  
 4 Rickettsia akari str. Hartford chromosome, whole genome shotgun sequence  
 5 Rickettsia conorii str. Malish 7, complete genome  
 6 Rickettsia sibirica 246 rsib\_agnrcr, whole genome shotgun sequence  
 7 Rickettsia rickettsii chromosome, whole genome shotgun sequence

Reg\_id: 618

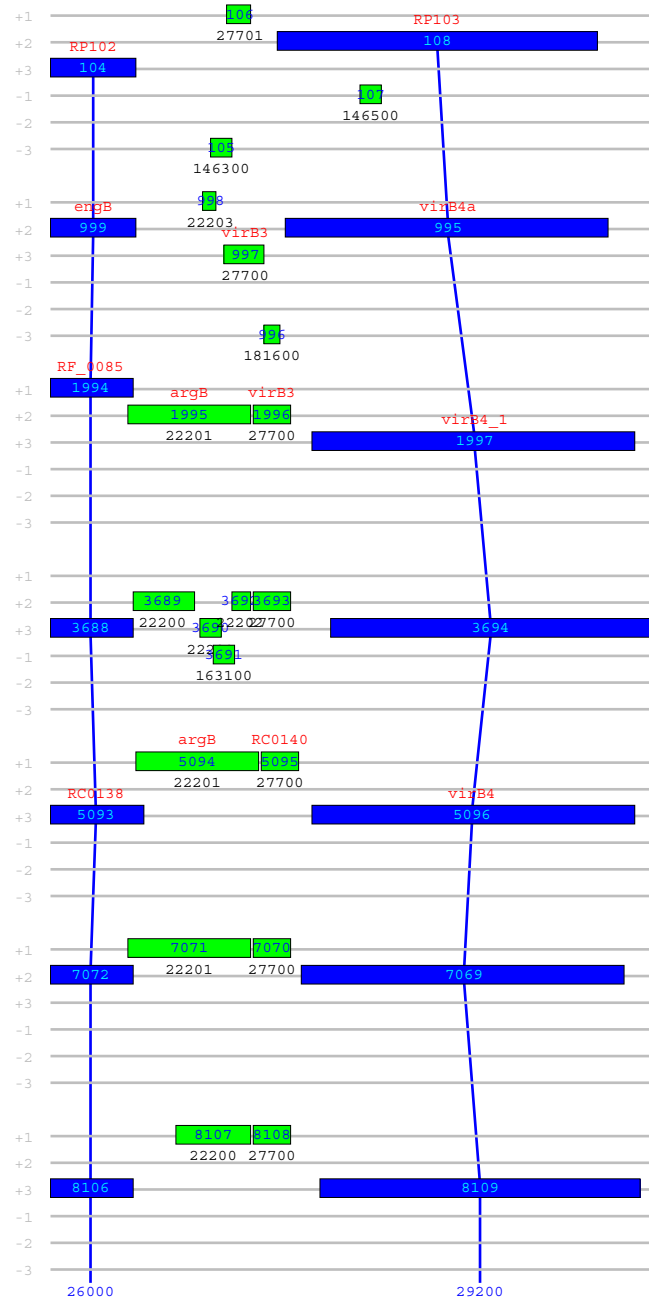

1 Rickettsia prowazekii str. Madrid E, complete genome  
 2 Rickettsia typhi str. wilmington, complete genome  
 3 Rickettsia felis URRWXCal2, complete genome  
 4 Rickettsia akari str. Hartford chromosome, whole genome shotgun sequence  
 5 Rickettsia conorii str. Malish 7, complete genome  
 6 Rickettsia sibirica 246 rsib\_agnrcr, whole genome shotgun sequence  
 7 Rickettsia rickettsii chromosome, whole genome shotgun sequence

Reg\_id: 623

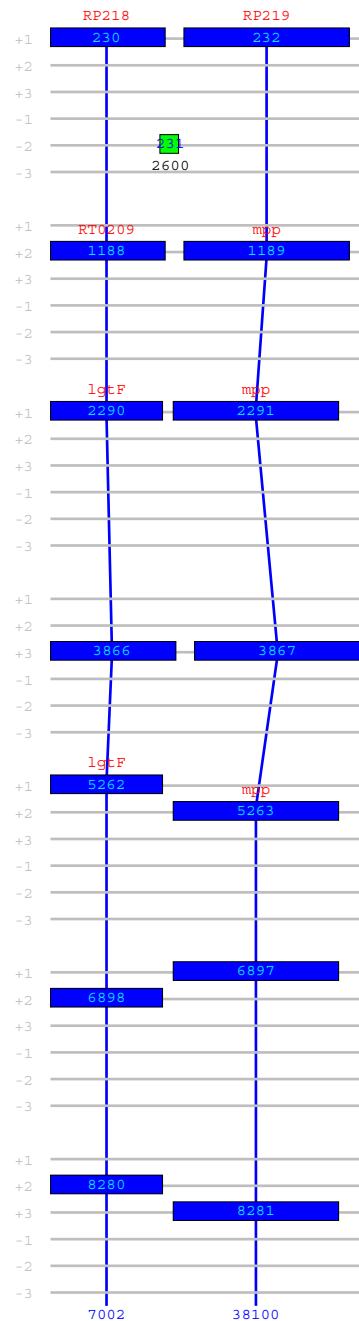



1 Rickettsia prowazekii str. Madrid E, complete genome  
 2 Rickettsia typhi str. wilmington, complete genome  
 3 Rickettsia felis URRWXCal2, complete genome  
 4 Rickettsia akari str. Hartford chromosome, whole genome shotgun sequence  
 5 Rickettsia conorii str. Malish 7, complete genome  
 6 Rickettsia sibirica 246 rsib agncrt, whole genome shotgun sequence  
 7 Rickettsia rickettsii chromosome, whole genome shotgun sequence

Reg\_id: 626

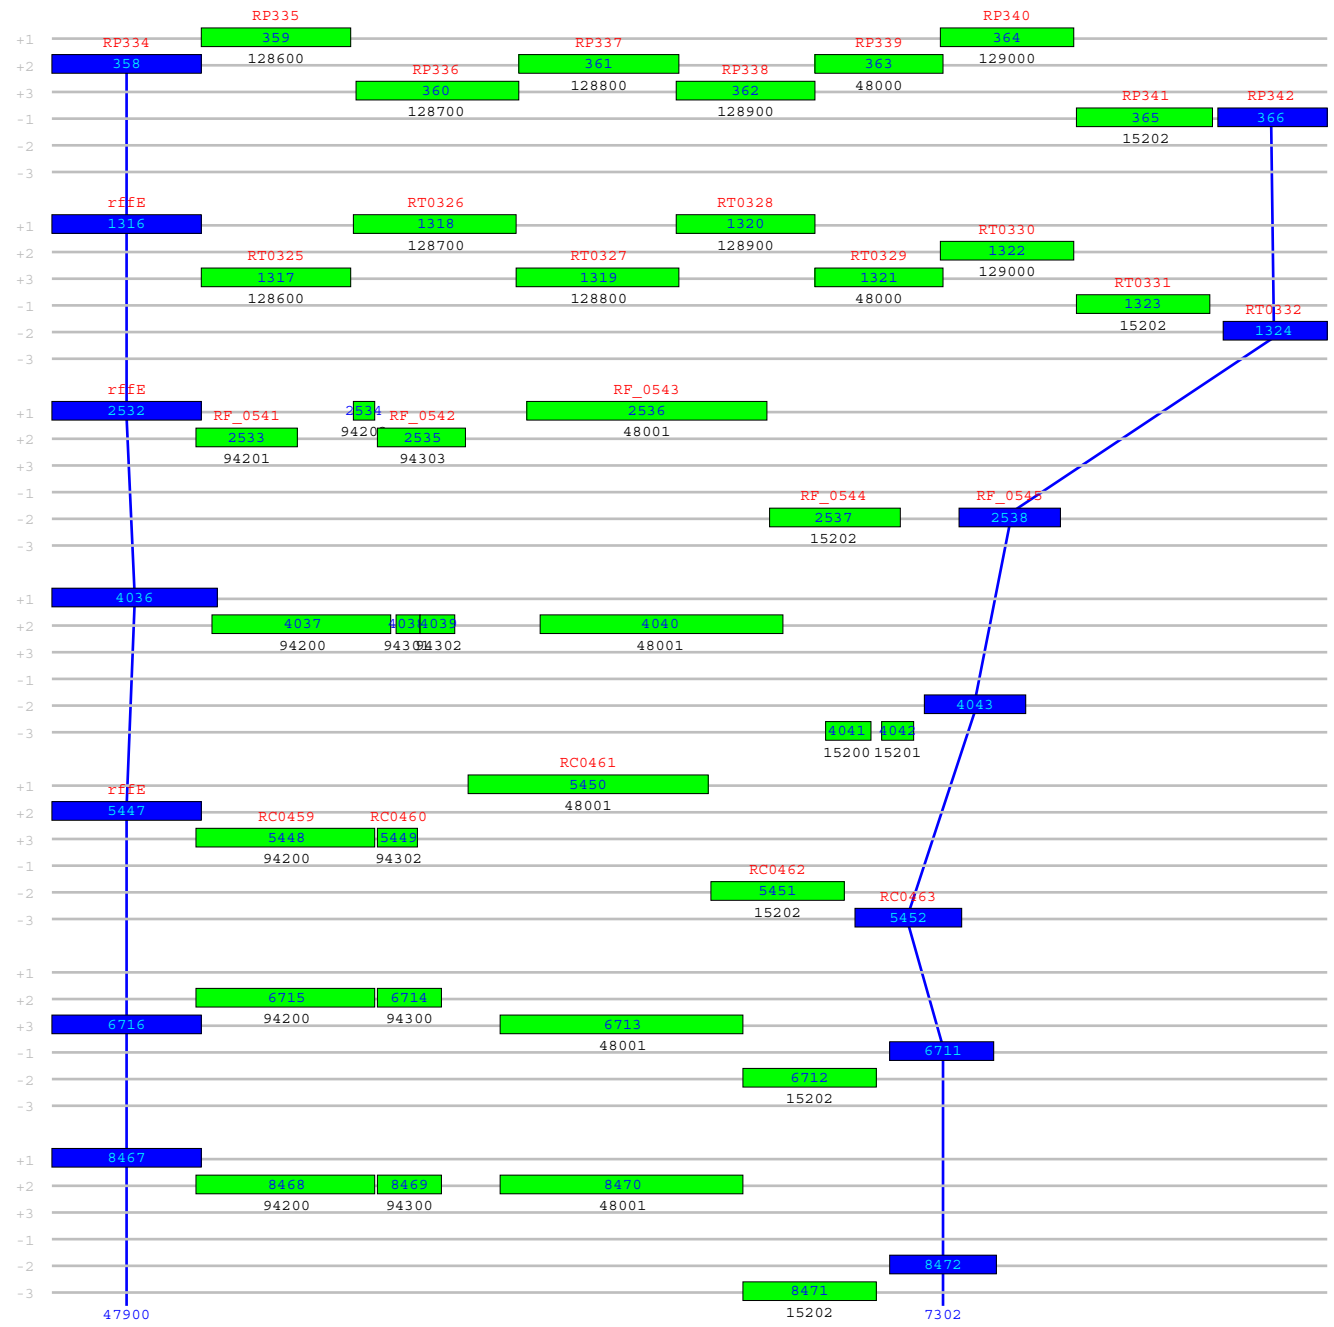

1 Rickettsia prowazekii str. Madrid E, complete genome  
 2 Rickettsia typhi str. wilmington, complete genome  
 3 Rickettsia felis URRWXCal2, complete genome  
 4 Rickettsia akari str. Hartford chromosome, whole genome shotgun sequence  
 5 Rickettsia conorii str. Malish 7, complete genome  
 6 Rickettsia sibirica 246 rsib\_agnrcr, whole genome shotgun sequence  
 7 Rickettsia rickettsii chromosome, whole genome shotgun sequence

Reg\_id: 627

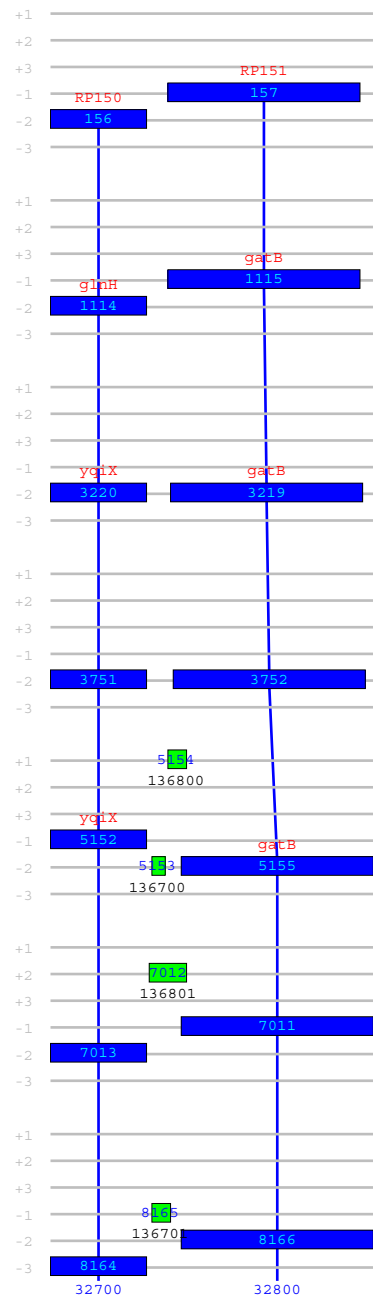

1 Rickettsia prowazekii str. Madrid E, complete genome  
 2 Rickettsia typhi str. wilmington, complete genome  
 3 Rickettsia felis URRWXCal2, complete genome  
 4 Rickettsia akari str. Hartford chromosome, whole genome shotgun sequence  
 5 Rickettsia conorii str. Malish 7, complete genome  
 6 Rickettsia sibirica 246 rsib\_agncrt, whole genome shotgun sequence  
 7 Rickettsia rickettsii chromosome, whole genome shotgun sequence

Reg\_id: 631

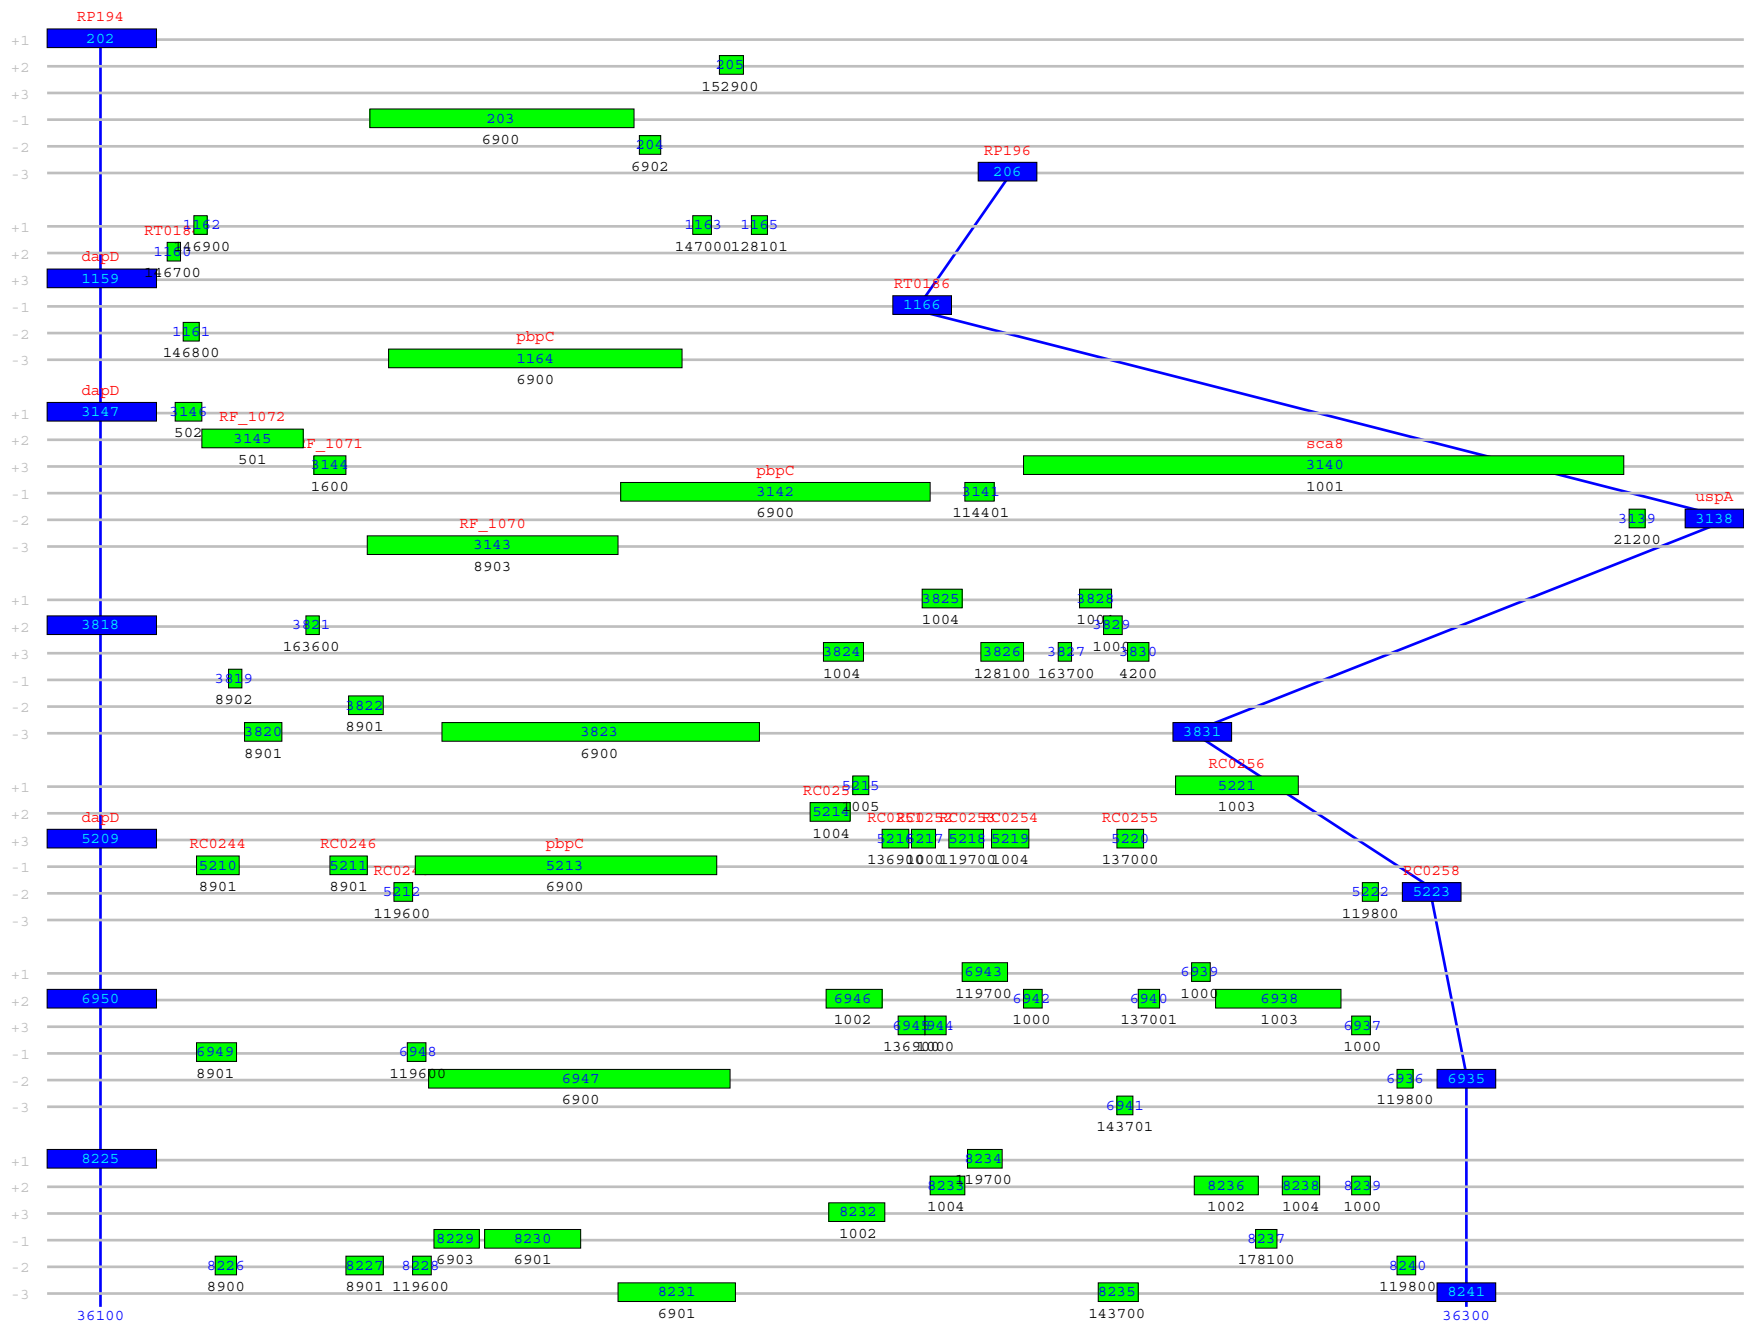

1 Rickettsia prowazekii str. Madrid E, complete genome  
 2 Rickettsia typhi str. wilmington, complete genome  
 3 Rickettsia felis URRWXCal2, complete genome  
 4 Rickettsia akari str. Hartford chromosome, whole genome shotgun sequence  
 5 Rickettsia conorii str. Malish 7, complete genome  
 6 Rickettsia sibirica 246 rsib\_agnrt, whole genome shotgun sequence  
 7 Rickettsia rickettsii chromosome, whole genome shotgun sequence

Reg\_id: 634

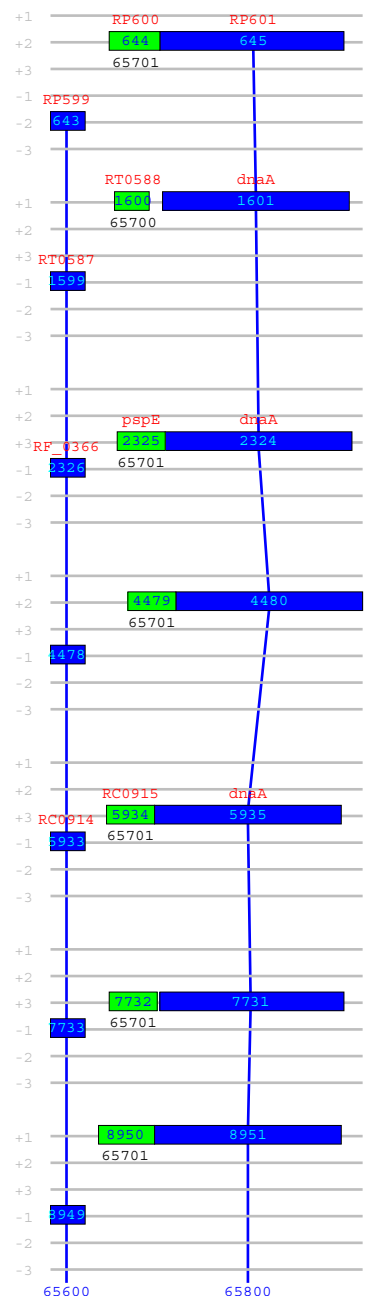

1 Rickettsia prowazekii str. Madrid E, complete genome  
 2 Rickettsia typhi str. wilmington, complete genome  
 3 Rickettsia felis URRWXCal2, complete genome  
 4 Rickettsia akari str. Hartford chromosome, whole genome shotgun sequence  
 5 Rickettsia conorii str. Malish 7, complete genome  
 6 Rickettsia sibirica 246 rsib\_agnrcr, whole genome shotgun sequence  
 7 Rickettsia rickettsii chromosome, whole genome shotgun sequence

Reg\_id: 636

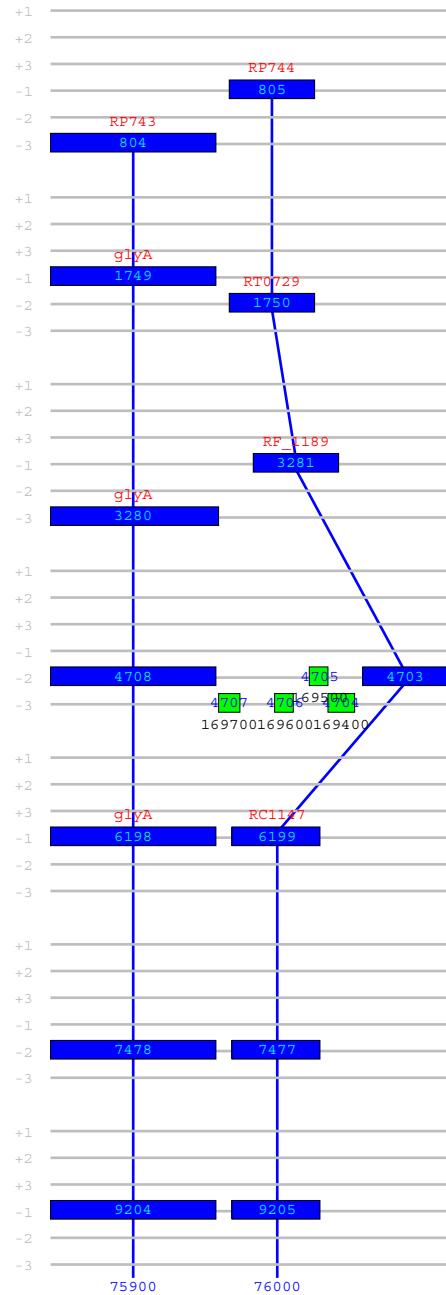

1 Rickettsia prowazekii str. Madrid E, complete genome  
 2 Rickettsia typhi str. wilmington, complete genome  
 3 Rickettsia felis URRWXCal2, complete genome  
 4 Rickettsia akari str. Hartford chromosome, whole genome shotgun sequence  
 5 Rickettsia conorii str. Malish 7, complete genome  
 6 Rickettsia sibirica 246 rsib\_agnrct, whole genome shotgun sequence  
 7 Rickettsia rickettsii chromosome, whole genome shotgun sequence

Reg\_id: 637

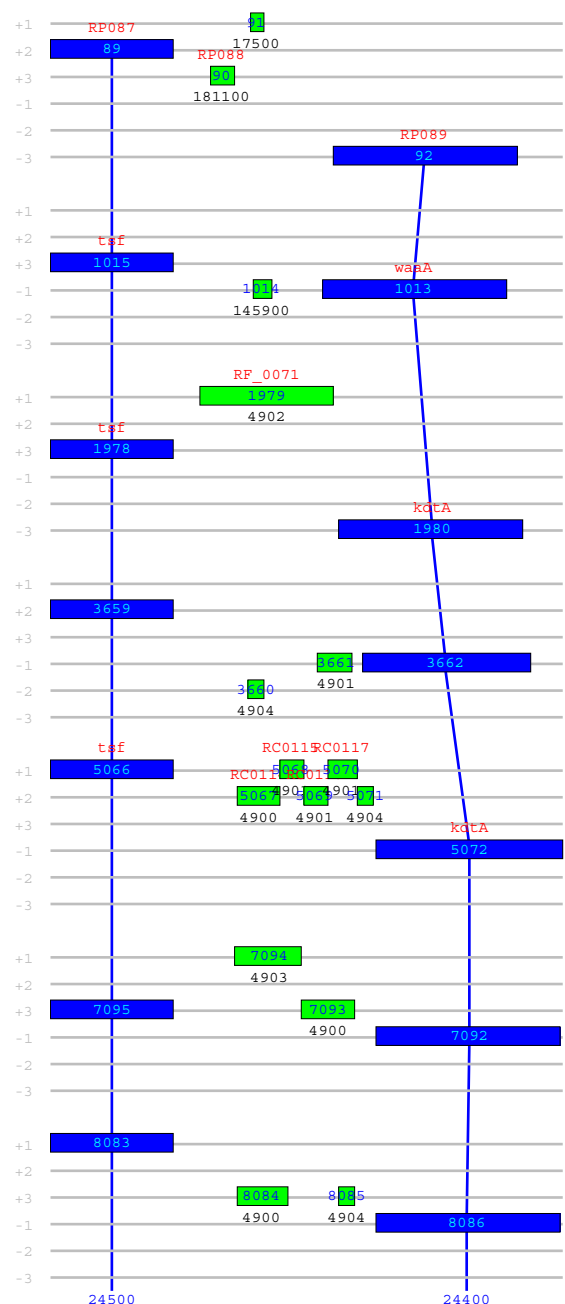

1 Rickettsia prowazekii str. Madrid E, complete genome  
2 Rickettsia typhi str. wilmington, complete genome  
3 Rickettsia felis URRWXCal2, complete genome  
4 Rickettsia akari str. Hartford chromosome, whole genome shotgun sequence  
5 Rickettsia conorii str. Malish 7, complete genome  
6 Rickettsia sibirica 246 rsib\_agnrcr, whole genome shotgun sequence  
7 Rickettsia rickettsii chromosome, whole genome shotgun sequence

Reg\_id: 639

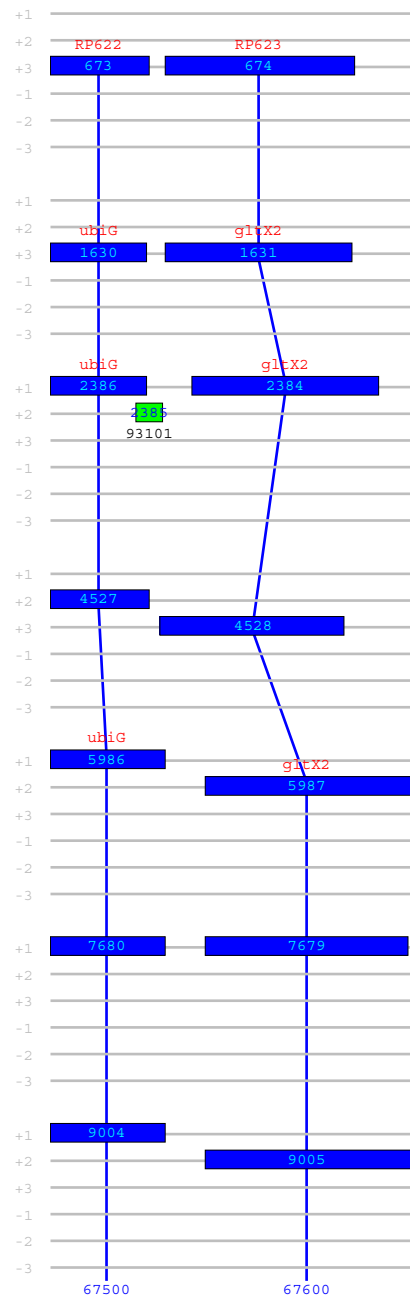





1 Rickettsia prowazekii str. Madrid E, complete genome  
 2 Rickettsia typhi str. wilmington, complete genome  
 3 Rickettsia felis URRWXCal2, complete genome  
 4 Rickettsia akari str. Hartford chromosome, whole genome shotgun sequence  
 5 Rickettsia conorii str. Malish 7, complete genome  
 6 Rickettsia sibirica 246 rsib\_agnrcr, whole genome shotgun sequence  
 7 Rickettsia rickettsii chromosome, whole genome shotgun sequence

Reg\_id: 641

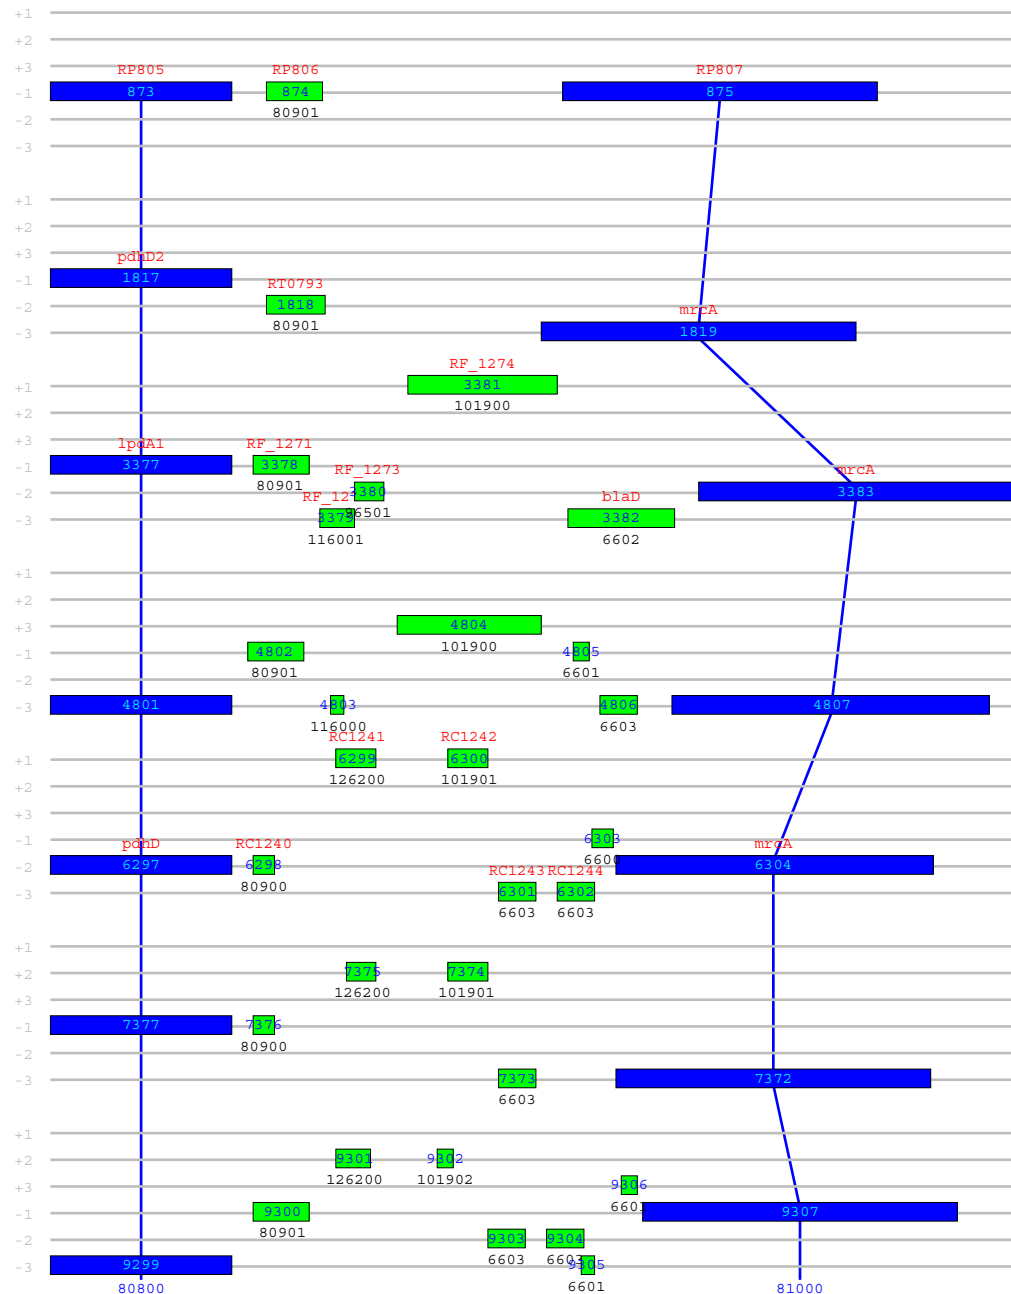

1 Rickettsia prowazekii str. Madrid E, complete genome  
 2 Rickettsia typhi str. wilmington, complete genome  
 3 Rickettsia felis URRWXCal2, complete genome  
 4 Rickettsia akari str. Hartford chromosome, whole genome shotgun sequence  
 5 Rickettsia conorii str. Malish 7, complete genome  
 6 Rickettsia sibirica 246 rsib\_agnrcr, whole genome shotgun sequence  
 7 Rickettsia rickettsii chromosome, whole genome shotgun sequence

Reg\_id: 642

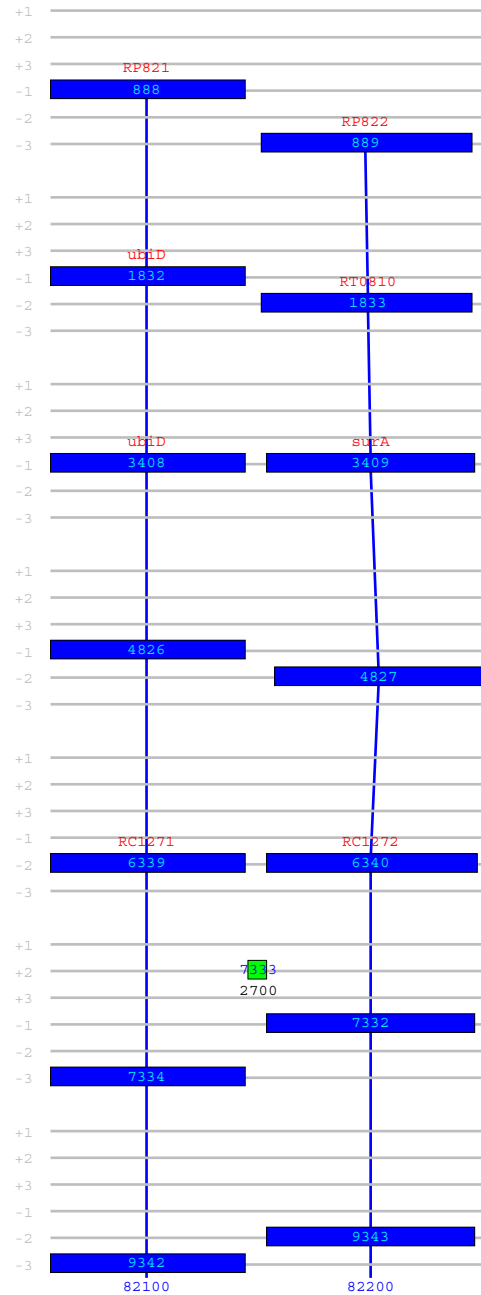

- 1 Rickettsia prowazekii str. Madrid E, complete genome
- 2 Rickettsia typhi str. wilmington, complete genome
- 3 Rickettsia felis URRWXCal2, complete genome
- 4 Rickettsia akari str. Hartford chromosome, whole genome shotgun sequence
- 5 Rickettsia conorii str. Malish 7, complete genome
- 6 Rickettsia sibirica 246 rsib\_agnrcr, whole genome shotgun sequence
- 7 Rickettsia rickettsii chromosome, whole genome shotgun sequence

Reg\_id: 643

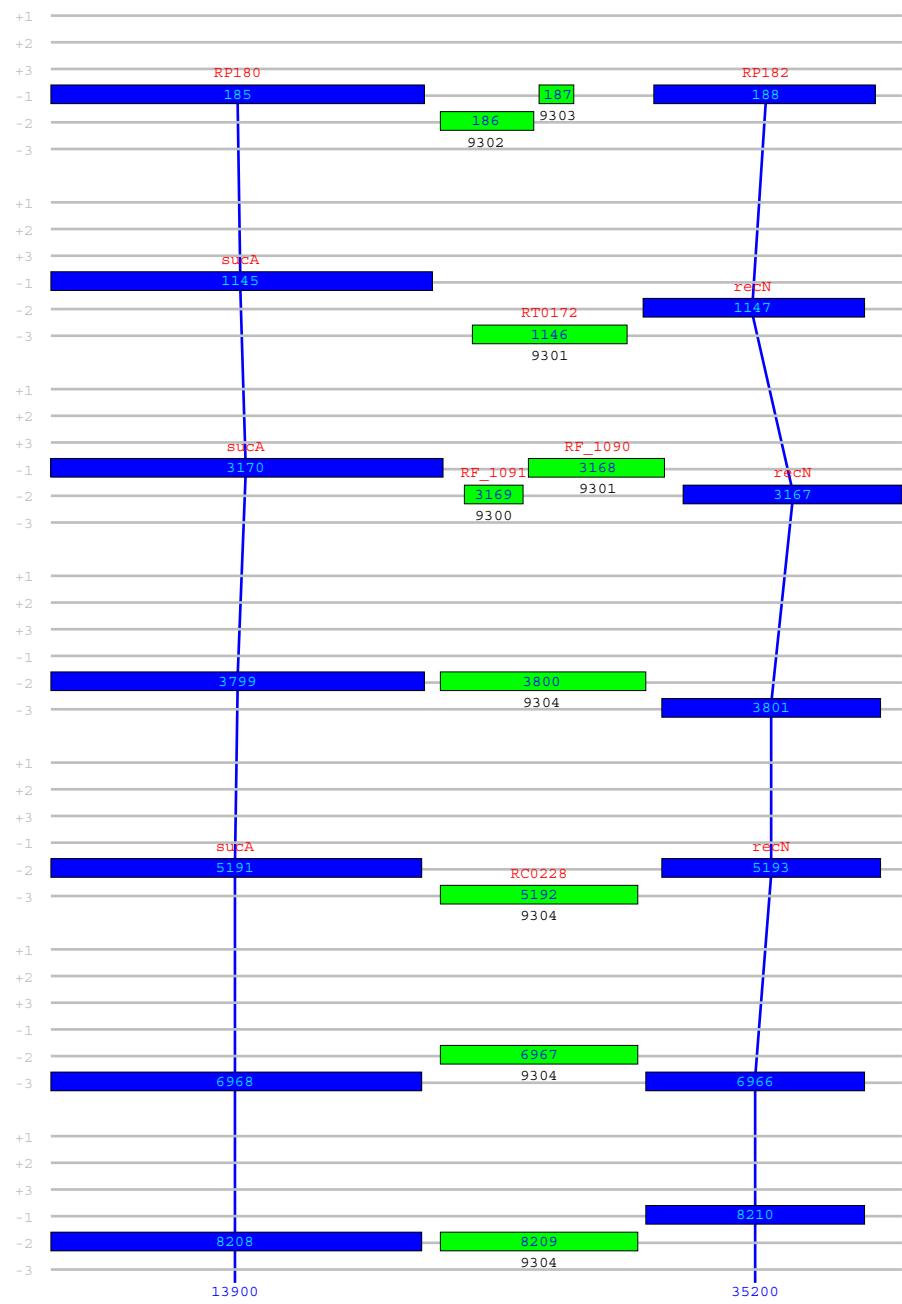

1 Rickettsia prowazekii str. Madrid E, complete genome  
 2 Rickettsia typhi str. wilmington, complete genome  
 3 Rickettsia felis URRWXCal2, complete genome  
 4 Rickettsia akari str. Hartford chromosome, whole genome shotgun sequence  
 5 Rickettsia conorii str. Malish 7, complete genome  
 6 Rickettsia sibirica 246 rsib\_agnrct, whole genome shotgun sequence  
 7 Rickettsia rickettsii chromosome, whole genome shotgun sequence

Reg\_id: 644

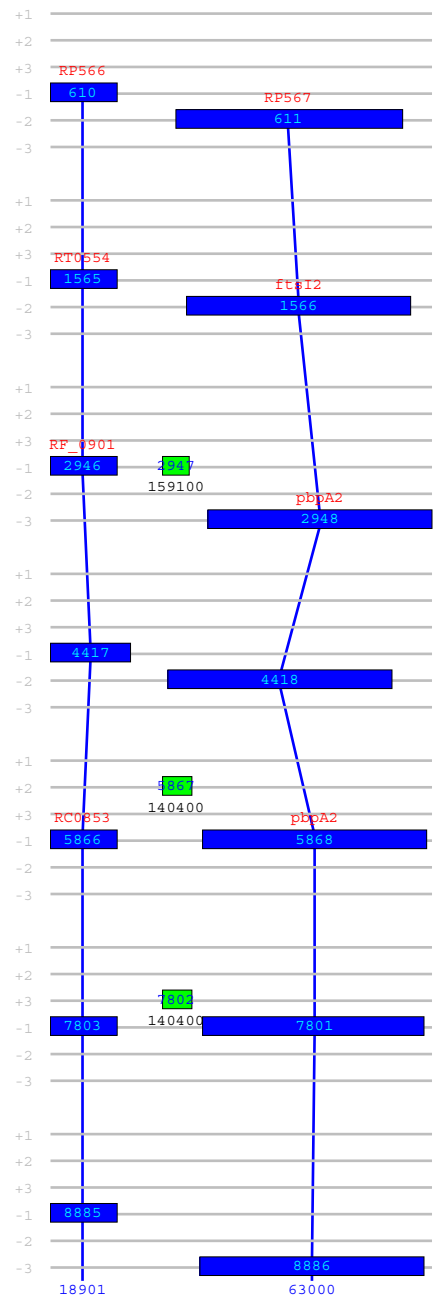

- 1 Rickettsia prowazekii str. Madrid E, complete genome
- 2 Rickettsia typhi str. wilmington, complete genome
- 3 Rickettsia felis URRWXCa2, complete genome
- 4 Rickettsia akari str. Hartford chromosome, whole genome shotgun sequence
- 5 Rickettsia conorii str. Malish 7, complete genome
- 6 Rickettsia sibirica 246 rsib\_agnrcr, whole genome shotgun sequence
- 7 Rickettsia rickettsii chromosome, whole genome shotgun sequence

Reg\_id: 646

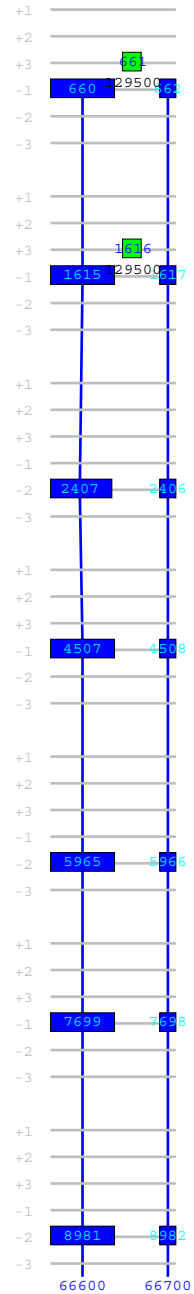

1 Rickettsia prowazekii str. Madrid E, complete genome  
 2 Rickettsia typhi str. wilmington, complete genome  
 3 Rickettsia felis URRWXCal2, complete genome  
 4 Rickettsia akari str. Hartford chromosome, whole genome shotgun sequence  
 5 Rickettsia conorii str. Malish 7, complete genome  
 6 Rickettsia sibirica 246 rsib\_agnrct, whole genome shotgun sequence  
 7 Rickettsia rickettsii chromosome, whole genome shotgun sequence

Reg\_id: 647

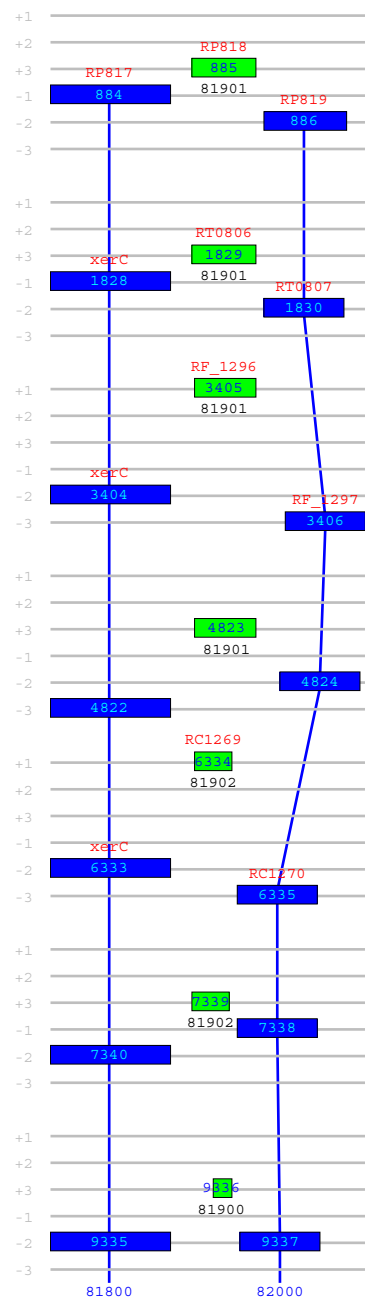

1 Rickettsia prowazekii str. Madrid E, complete genome  
 2 Rickettsia typhi str. wilmington, complete genome  
 3 Rickettsia felis URRWXCa12, complete genome  
 4 Rickettsia akari str. Hartford chromosome, whole genome shotgun sequence  
 5 Rickettsia conorii str. Malish 7, complete genome  
 6 Rickettsia sibirica 246 rsib\_agnrcr, whole genome shotgun sequence  
 7 Rickettsia rickettsii chromosome, whole genome shotgun sequence

Reg\_id: 648

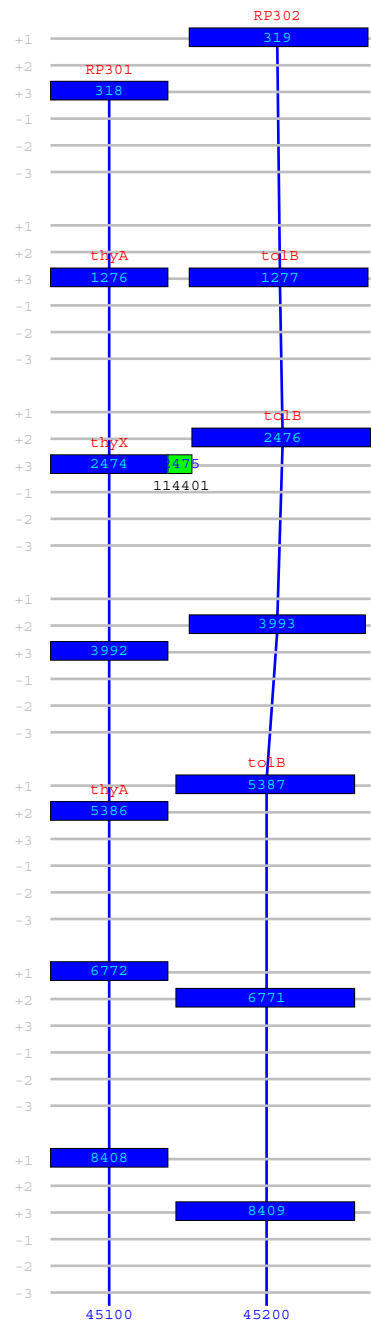

1 Rickettsia prowazekii str. Madrid E, complete genome  
 2 Rickettsia typhi str. wilmington, complete genome  
 3 Rickettsia felis URRWXCal2, complete genome  
 4 Rickettsia akari str. Hartford chromosome, whole genome shotgun sequence  
 5 Rickettsia conorii str. Malish 7, complete genome  
 6 Rickettsia sibirica 246 rsib\_agnrct, whole genome shotgun sequence  
 7 Rickettsia rickettsii chromosome, whole genome shotgun sequence

Reg\_id: 653

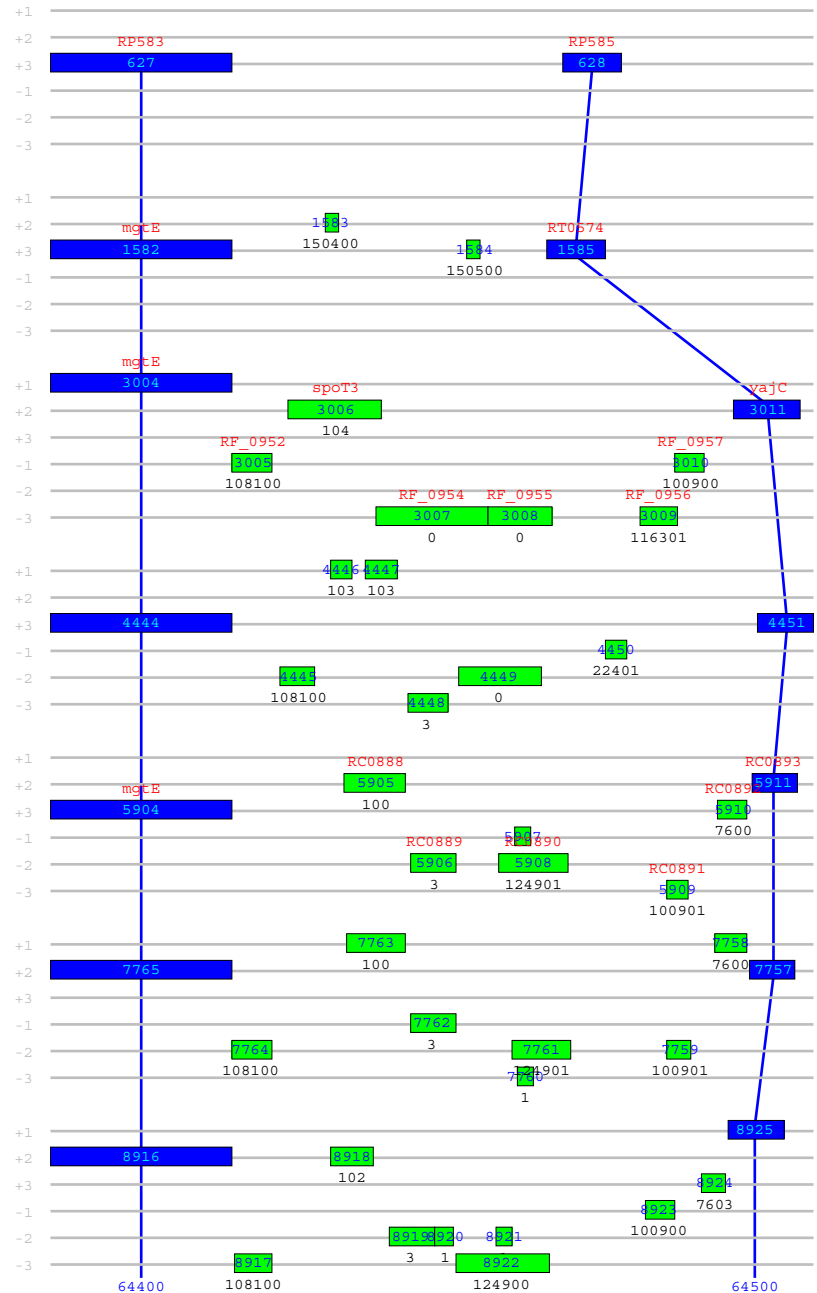



1 Rickettsia prowazekii str. Madrid E, complete genome  
 2 Rickettsia typhi str. wilmington, complete genome  
 3 Rickettsia felis URRWXCal2, complete genome  
 4 Rickettsia akari str. Hartford chromosome, whole genome shotgun sequence  
 5 Rickettsia conorii str. Malish 7, complete genome  
 6 Rickettsia sibirica 246 rsib\_agnrcr, whole genome shotgun sequence  
 7 Rickettsia rickettsii chromosome, whole genome shotgun sequence

Reg\_id: 655

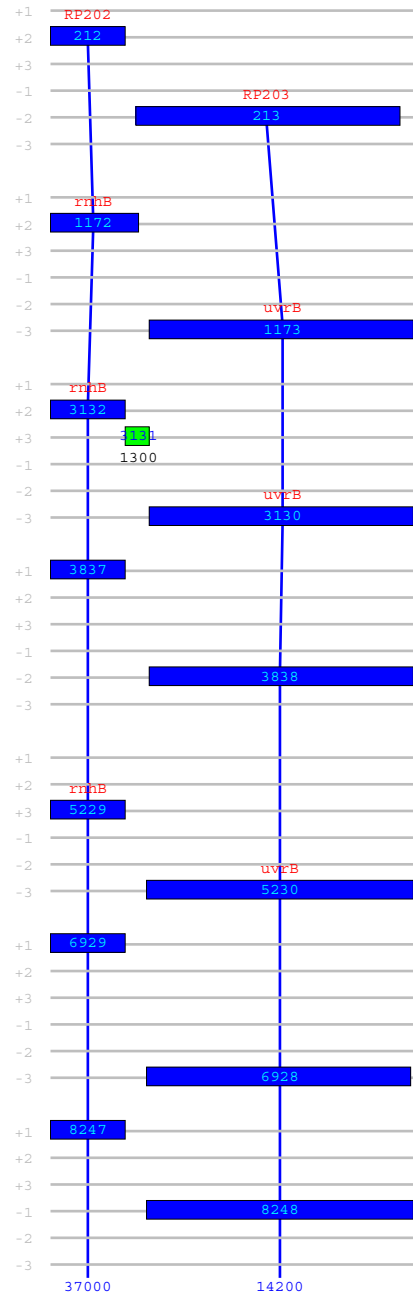

1 Rickettsia prowazekii str. Madrid E, complete genome  
 2 Rickettsia typhi str. wilmington, complete genome  
 3 Rickettsia felis URRWXCal2, complete genome  
 4 Rickettsia akari str. Hartford chromosome, whole genome shotgun sequence  
 5 Rickettsia conorii str. Malish 7, complete genome  
 6 Rickettsia sibirica 246 rsib\_agnrcr, whole genome shotgun sequence  
 7 Rickettsia rickettsii chromosome, whole genome shotgun sequence

Reg\_id: 657

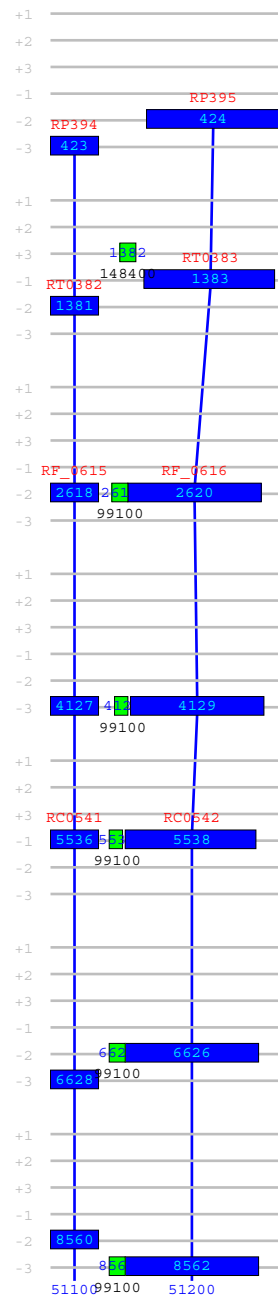

Supplement: gb-2008-9-2-r42-S1.pdf [file gb-2008-9-2-r42-S1.pdf]
